# Supplementary material
Source: Research Square preprint supplement (doi:10.21203/rs.3.rs-10299849/v1)
Supplement: Supplementary file 1 [file 10d1745a38850e3964572145.xlsx]

## Sheet: Contents
Sheet	Description	Rows	Columns	Units / notes	Source file
Boundaries	Global planetary boundary thresholds used (lower and upper bound) per indicator, with units and source notes.	7	5	see Unit column	results/PlanetaryBoundaries_BoundariesUsed.csv
Footprint_Absolute	Consumption-based (footprint) absolute environmental pressure by indicator, region and year (2000-2020).	364	23	Acid: kg CO2eq; Biodiversity: pdf (potentially disappeared fraction); Climate: kg CO2eq; Land: km2; Nitrogen: kg; Phosphorus: kg; Water: million m3 (AWARE scarcity-weighted, normalised to blue water total)	results/PlanetaryBoundariesRawResults.csv
Footprint_PerCapita	Footprint per capita by indicator, region and year (2000-2050; 2021+ projected).	364	53	absolute units per person	results/PlanetaryBoundariesPerCapResults.csv
Footprint_PerGDP	Footprint per unit GDP by indicator, region and year (2000-2050; 2021+ projected).	364	53	absolute units per 2010 Int$ (PPP)	results/PlanetaryBoundariesPerGDPResults.csv
ImportShare	Share of each region's footprint embodied in imports, by indicator and year (2000-2020).	364	23	percent	results/PlanetaryBoundaries_imp_share.csv
Exceedance_LowerBound	Footprint relative to the population/PPP-allocated LOWER planetary boundary. Value > 1 means the allocated boundary is exceeded.	364	53	dimensionless ratio	results/PlanetaryBoundaries_Exceedence_LowerBound.csv
Exceedance_UpperBound	Footprint relative to the population/PPP-allocated UPPER planetary boundary. Value > 1 means exceeded.	364	53	dimensionless ratio	results/PlanetaryBoundaries_Exceedence_UpperBound.csv
Alloc_LowerBound_Pop	Lower planetary boundary allocated to each region on a per-capita (population-share) basis.	364	53	Acid: kg CO2eq; Biodiversity: pdf (potentially disappeared fraction); Climate: kg CO2eq; Land: km2; Nitrogen: kg; Phosphorus: kg; Water: million m3 (AWARE scarcity-weighted, normalised to blue water total)	results/PlanetaryBoundaries_LowerBound_Population.csv
Alloc_LowerBound_PPP	Lower planetary boundary allocated to each region on a GDP-share (PPP) basis.	364	53	Acid: kg CO2eq; Biodiversity: pdf (potentially disappeared fraction); Climate: kg CO2eq; Land: km2; Nitrogen: kg; Phosphorus: kg; Water: million m3 (AWARE scarcity-weighted, normalised to blue water total)	results/PlanetaryBoundaries_LowerBound_PPP.csv
Alloc_UpperBound_Pop	Upper planetary boundary allocated to each region on a per-capita (population-share) basis.	364	53	Acid: kg CO2eq; Biodiversity: pdf (potentially disappeared fraction); Climate: kg CO2eq; Land: km2; Nitrogen: kg; Phosphorus: kg; Water: million m3 (AWARE scarcity-weighted, normalised to blue water total)	results/PlanetaryBoundaries_UpperBound_Population.csv
Alloc_UpperBound_PPP	Upper planetary boundary allocated to each region on a GDP-share (PPP) basis.	364	53	Acid: kg CO2eq; Biodiversity: pdf (potentially disappeared fraction); Climate: kg CO2eq; Land: km2; Nitrogen: kg; Phosphorus: kg; Water: million m3 (AWARE scarcity-weighted, normalised to blue water total)	results/PlanetaryBoundaries_UpperBound_PPP.csv
Decoupling_AbsIndex	Absolute decoupling index by indicator and region.	364	3	index	results/AbsoluteDecouplingIndex.csv
Decoupling_RelIndex	Relative decoupling index by indicator and region.	364	3	index	results/RelativeDecouplingIndex.csv
Decoupling_Yearly	Year-by-year decoupling metric by indicator and region.	364	52	see methods	results/PlanetaryBoundariesDecoupYearly.csv
Decoupling_Total	Whole-period decoupling metric by indicator and region.	364	3	see methods	results/PlanetaryBoundariesDecoupTotal.csv
Decoupling_DiffTotal	Whole-period difference metric by indicator and region.	364	3	see methods	results/PlanetaryBoundariesDiffTotal.csv
SDA_3driver	Structural decomposition (3 drivers: Technology, Affluence, Population) of the change in footprint, long format.	21840	6	absolute units (component contributions)	results/decomp.csv
SDA_4driver_MD	Structural decomposition (4 drivers: Tech-Imported, Tech-Domestic, Affluence, Population), long format.	29120	6	absolute units (component contributions)	results/decompMD.csv
SDA_5driver_MDa	Structural decomposition (5 drivers: Tech-Imp, Tech-Dom, Aff-Imp, Aff-Dom, Population), long format.	36400	6	absolute units (component contributions)	results/decompMDa.csv
Decomp_5drv_2000_2020	Headline 5-driver decomposition over 2000-2020 with base/final levels and percentage-point contributions per region and indicator.	364	23	absolute and percent	results/decompMDa_relative_2000_2020.csv
Trade_LMDI	LMDI trade-channel decomposition (5 drivers) of the change in footprint, long format.	35700	6	absolute units (component contributions)	results/decompTrade.csv
Trade_Origin	Footprint by consumer region, origin group (domestic vs import regions) and year.	22932	5	Acid: kg CO2eq; Biodiversity: pdf (potentially disappeared fraction); Climate: kg CO2eq; Land: km2; Nitrogen: kg; Phosphorus: kg; Water: million m3 (AWARE scarcity-weighted, normalised to blue water total)	results/PlanetaryBoundaries_trade_origin.csv
Trade_DecompInputs	Inputs to the trade decomposition: domestic impact (I_d), imported impact (I_m), import share (alpha) and total final demand (Y_total).	7644	7	I_d/I_m in absolute units; alpha fraction; Y_total in 2010 Int$	results/PlanetaryBoundaries_trade_decomp_inputs.csv
Sens_Allocation	Allocation-principle sensitivity: 2020 exceedance of the lower bound under equal per-capita, grandfathering and ability-to-pay downscaling.	21	5	dimensionless ratio	results/PlanetaryBoundaries_AllocationSensitivity.csv
Sens_WaterScarcity	Water scarcity-weighting sensitivity: consumption-based water footprint by region and year under all three weightings: AWARE (main, normalised per year so the global total equals blue water consumption), unweighted blue water, and Pfister/WSI. AWARE-main and unweighted share the same global total each year (comparable in Mm3); Pfister is in Mm3 WSI-eq (see unit column).	3276	5	see unit column	results/PlanetaryBoundaries_WaterScarcitySensitivity.csv
Input_Population	Population by region and year (2000-2050). Input reference series.	52	52	persons	input_data/pop.csv
Input_GDP_PPP	GDP at purchasing power parity, constant 2010 international dollars, by region and year (2000-2050). Input reference series.	52	52	2010 Int$ (PPP)	input_data/ppp.csv

## Sheet: Boundaries
Indicator	Lower	Upper	Unit
Acid	32000000000000	40000000000000	kg CO2eq
Biodiversity	0.1	0.3	pdf
Climate	20000000000000	45000000000000	kg CO2eq
Land	15000000	24000000	km2
Nitrogen	62000000000	112000000000	kg
Phosphorus	6200000000	11200000000	kg
Water	4000000	6000000	million m3

## Sheet: Footprint_Absolute
indicator	region	2000	2001	2002	2003	2004	2005	2006	2007	2008	2009	2010	2011	2012	2013	2014	2015	2016	2017	2018	2019	2020
Acid	AUT	8.69889e+10	9.25348e+10	9.50908e+10	9.91166e+10	1.02147e+11	1.02477e+11	1.02649e+11	1.0322e+11	1.03323e+11	9.74098e+10	9.61333e+10	9.44139e+10	8.99154e+10	9.07701e+10	8.78012e+10	8.79918e+10	8.70886e+10	9.21311e+10	9.17695e+10	8.93843e+10	7.92032e+10
Acid	BEL	1.34822e+11	1.3236e+11	1.26737e+11	1.37227e+11	1.33588e+11	1.40582e+11	1.50046e+11	1.49745e+11	1.6448e+11	1.49918e+11	1.32975e+11	1.27815e+11	1.2108e+11	1.23199e+11	1.23428e+11	1.26519e+11	1.20462e+11	1.24105e+11	1.31264e+11	1.23736e+11	1.12702e+11
Acid	BGR	4.13859e+10	4.42219e+10	4.17203e+10	4.61293e+10	4.25563e+10	4.46965e+10	4.5821e+10	4.99535e+10	4.14454e+10	3.88405e+10	3.37249e+10	3.61453e+10	3.54473e+10	3.18993e+10	3.22381e+10	3.17168e+10	3.08254e+10	3.08241e+10	2.85183e+10	2.93893e+10	2.83858e+10
Acid	CYP	8.1038e+09	7.98665e+09	9.00848e+09	9.794e+09	9.99275e+09	1.09662e+10	1.24176e+10	1.35664e+10	1.66275e+10	1.52972e+10	1.47608e+10	1.41092e+10	1.25468e+10	1.08998e+10	1.06948e+10	9.86205e+09	1.02848e+10	1.07563e+10	1.05253e+10	1.07922e+10	9.05208e+09
Acid	CZE	1.11965e+11	1.12874e+11	1.10058e+11	1.19792e+11	1.08821e+11	1.05866e+11	1.18636e+11	1.16136e+11	1.1798e+11	1.03039e+11	1.10379e+11	1.12023e+11	1.0103e+11	9.92209e+10	9.37783e+10	9.46066e+10	8.56753e+10	9.79895e+10	8.89886e+10	1.00231e+11	8.39364e+10
Acid	DEU	1.02422e+12	1.00373e+12	9.63053e+11	1.01845e+12	1.00778e+12	1.00969e+12	1.03044e+12	9.9833e+11	1.03395e+12	9.39718e+11	9.38055e+11	9.52278e+11	9.10807e+11	9.09169e+11	8.92639e+11	8.65499e+11	8.82225e+11	8.98131e+11	8.82866e+11	8.65223e+11	7.59321e+11
Acid	DNK	7.27726e+10	7.19728e+10	6.79063e+10	7.29414e+10	7.60096e+10	7.06919e+10	7.89528e+10	8.26457e+10	7.80147e+10	6.90387e+10	6.5871e+10	6.55188e+10	5.89067e+10	6.30114e+10	6.10997e+10	6.25848e+10	7.03049e+10	6.34728e+10	4.78661e+10	6.89522e+10	5.73869e+10
Acid	EST	1.40582e+10	1.44706e+10	1.35967e+10	1.56519e+10	1.5416e+10	1.46196e+10	1.69364e+10	1.8661e+10	1.52869e+10	1.24838e+10	1.39836e+10	1.34902e+10	1.18893e+10	1.35761e+10	1.2936e+10	1.15948e+10	1.12555e+10	1.21135e+10	1.11386e+10	8.59142e+09	8.35984e+09
Acid	ESP	3.26624e+11	3.34931e+11	3.598e+11	3.68933e+11	4.0141e+11	4.23736e+11	4.28377e+11	4.60687e+11	4.12532e+11	3.45106e+11	3.21258e+11	3.24333e+11	2.93225e+11	2.73663e+11	2.84101e+11	2.92658e+11	2.81936e+11	3.0147e+11	2.88636e+11	2.87299e+11	2.36984e+11
Acid	FIN	6.32037e+10	6.83703e+10	6.36547e+10	8.26833e+10	7.51096e+10	7.56694e+10	8.4784e+10	8.37446e+10	7.61705e+10	6.96537e+10	7.73076e+10	7.57135e+10	6.5165e+10	6.50786e+10	5.94152e+10	5.30489e+10	5.63284e+10	5.63059e+10	5.84778e+10	5.41695e+10	4.34545e+10
Acid	FRA	4.95146e+11	4.90478e+11	4.88059e+11	5.16561e+11	5.37751e+11	5.42945e+11	5.39212e+11	5.37213e+11	5.36149e+11	4.94227e+11	4.94138e+11	4.86391e+11	4.81469e+11	4.76274e+11	4.50236e+11	4.43789e+11	4.54418e+11	4.82805e+11	4.73298e+11	4.64057e+11	3.91955e+11
Acid	GRC	1.12518e+11	1.11857e+11	1.15484e+11	1.25042e+11	1.25704e+11	1.34624e+11	1.4241e+11	1.66475e+11	1.47488e+11	1.42037e+11	1.43364e+11	1.24103e+11	1.0603e+11	1.00214e+11	1.03404e+11	7.9197e+10	7.45232e+10	8.51176e+10	9.19886e+10	6.54978e+10	8.40586e+10
Acid	HRV	2.00166e+10	2.18015e+10	2.41127e+10	2.72026e+10	2.73761e+10	2.8228e+10	2.83723e+10	2.91152e+10	2.98306e+10	2.62339e+10	2.38856e+10	2.30356e+10	1.99839e+10	2.08442e+10	1.95597e+10	1.91234e+10	2.02265e+10	2.10586e+10	2.10944e+10	2.10893e+10	2.01052e+10
Acid	HUN	5.22111e+10	5.60976e+10	5.84044e+10	6.82582e+10	6.90789e+10	6.71785e+10	6.8498e+10	6.76297e+10	6.90139e+10	5.78812e+10	5.66492e+10	5.48264e+10	5.12537e+10	5.18555e+10	5.02485e+10	5.13922e+10	5.13649e+10	5.21819e+10	5.58486e+10	5.95699e+10	4.95024e+10
Acid	IRL	5.08563e+10	5.58222e+10	5.51407e+10	6.47568e+10	6.54258e+10	7.39189e+10	8.03567e+10	8.46728e+10	8.16646e+10	7.23423e+10	5.56077e+10	5.38077e+10	4.97475e+10	4.63268e+10	5.3023e+10	5.10892e+10	5.88883e+10	7.61517e+10	6.85726e+10	1.22895e+11	7.5679e+10
Acid	ITA	5.33559e+11	5.26905e+11	5.45473e+11	5.72721e+11	6.00157e+11	6.00643e+11	6.13594e+11	6.07743e+11	5.87844e+11	5.3858e+11	5.65646e+11	5.47883e+11	4.87337e+11	4.58177e+11	4.43356e+11	4.45192e+11	4.34269e+11	4.33879e+11	4.44637e+11	4.24862e+11	3.68012e+11
Acid	LTU	1.15296e+10	1.20288e+10	1.22046e+10	1.23097e+10	1.37181e+10	1.66207e+10	1.77533e+10	2.03117e+10	2.05494e+10	1.50635e+10	1.70672e+10	1.82443e+10	1.80367e+10	1.53818e+10	1.60268e+10	1.41998e+10	1.34559e+10	1.37839e+10	1.50984e+10	1.5632e+10	1.19111e+10
Acid	LUX	9.58552e+09	1.24489e+10	1.263e+10	1.3712e+10	1.60001e+10	1.62858e+10	1.5831e+10	1.59896e+10	1.63961e+10	1.51648e+10	1.38239e+10	1.33162e+10	1.37174e+10	1.38781e+10	1.6285e+10	1.46181e+10	1.60984e+10	1.51762e+10	1.44283e+10	1.6785e+10	1.5735e+10
Acid	LVA	8.64721e+09	9.13562e+09	9.35999e+09	9.92371e+09	1.03044e+10	9.9179e+09	1.30095e+10	1.46096e+10	1.34718e+10	8.95195e+09	9.1321e+09	1.02776e+10	8.9431e+09	9.14578e+09	1.06765e+10	9.42719e+09	9.05045e+09	8.73177e+09	9.39983e+09	8.96563e+09	7.81586e+09
Acid	MLT	2.87796e+09	3.12234e+09	2.80309e+09	3.1879e+09	3.2467e+09	3.37089e+09	3.2697e+09	3.2519e+09	3.2999e+09	3.03006e+09	3.02552e+09	2.97512e+09	3.15554e+09	2.67794e+09	2.53388e+09	2.30823e+09	2.55967e+09	2.54942e+09	2.76695e+09	2.82994e+09	2.86925e+09
Acid	NLD	2.07422e+11	2.06218e+11	2.05672e+11	2.15283e+11	2.2598e+11	2.19635e+11	2.22361e+11	2.27335e+11	2.27064e+11	2.08705e+11	1.96779e+11	1.98356e+11	1.90247e+11	1.90645e+11	1.80209e+11	1.96591e+11	1.75615e+11	1.94092e+11	1.8972e+11	2.04552e+11	1.75768e+11
Acid	POL	2.75054e+11	2.74516e+11	2.70782e+11	2.74731e+11	2.73143e+11	2.8185e+11	2.82268e+11	3.01942e+11	3.09493e+11	2.8593e+11	3.00758e+11	2.88817e+11	2.80121e+11	2.71035e+11	2.67017e+11	2.60051e+11	2.65229e+11	2.77938e+11	2.82952e+11	2.68235e+11	2.56543e+11
Acid	PRT	7.26161e+10	7.31392e+10	7.68294e+10	7.34398e+10	8.00329e+10	8.2792e+10	7.57034e+10	7.54948e+10	7.49658e+10	6.92403e+10	6.64335e+10	6.12701e+10	5.25539e+10	4.90254e+10	5.16548e+10	4.96521e+10	5.1978e+10	5.20521e+10	5.25089e+10	4.92401e+10	4.46799e+10
Acid	ROM	8.25327e+10	8.80919e+10	8.52653e+10	9.25666e+10	8.82937e+10	9.15633e+10	1.00286e+11	1.06087e+11	1.04508e+11	8.28212e+10	7.69727e+10	8.72027e+10	7.97299e+10	6.77421e+10	6.55553e+10	6.74195e+10	6.94763e+10	7.37426e+10	7.93775e+10	7.76093e+10	7.43243e+10
Acid	SWE	8.51333e+10	7.98556e+10	8.06982e+10	9.08727e+10	8.8646e+10	8.66629e+10	8.86605e+10	8.83959e+10	8.66713e+10	7.6034e+10	8.12136e+10	8.02735e+10	7.14163e+10	7.3477e+10	7.33589e+10	7.41702e+10	7.37163e+10	7.27381e+10	7.40376e+10	7.36342e+10	6.29652e+10
Acid	SVN	1.57163e+10	1.42984e+10	1.44631e+10	1.64432e+10	1.59945e+10	1.60625e+10	1.63786e+10	1.81234e+10	2.09694e+10	1.64341e+10	1.68517e+10	1.70535e+10	1.52219e+10	1.40473e+10	1.31813e+10	1.36246e+10	1.35567e+10	1.40001e+10	1.31796e+10	1.37651e+10	1.38889e+10
Acid	SVK	3.75199e+10	3.67359e+10	3.62836e+10	3.6482e+10	3.61837e+10	3.7857e+10	3.85385e+10	4.35432e+10	4.7651e+10	3.94461e+10	3.92046e+10	3.79688e+10	3.33031e+10	3.37379e+10	3.23022e+10	3.29183e+10	3.42186e+10	3.56953e+10	3.72446e+10	3.726e+10	3.27957e+10
Acid	GBR	7.05995e+11	7.09878e+11	7.1545e+11	7.23507e+11	7.63662e+11	7.67747e+11	8.09761e+11	7.99809e+11	7.48127e+11	6.43164e+11	6.73185e+11	6.53337e+11	6.4782e+11	6.40025e+11	6.34582e+11	6.36305e+11	5.95392e+11	5.88902e+11	5.86963e+11	5.98571e+11	4.67249e+11
Acid	USA	6.39636e+12	6.42489e+12	6.3903e+12	6.48183e+12	6.62033e+12	6.75667e+12	6.71556e+12	6763999943360	6.27042e+12	5.81759e+12	6.0827e+12	5.8704e+12	5.61592e+12	5.74393e+12	5.89711e+12	5.88435e+12	5.67788e+12	5.69479e+12	5.92189e+12	6.61071e+12	5.07628e+12
Acid	JPN	1.47102e+12	1.44464e+12	1.43754e+12	1.46653e+12	1.47563e+12	1.51395e+12	1.51291e+12	1.49033e+12	1.46984e+12	1.34563e+12	1.39883e+12	1.53014e+12	1.55147e+12	1.48124e+12	1.43845e+12	1.3566e+12	1.31702e+12	1.32107e+12	1.28855e+12	1.30182e+12	1.17723e+12
Acid	CHN	2.83484e+12	3.00486e+12	3.17827e+12	3.61554e+12	4.17451e+12	4.5174e+12	4.73567e+12	5.20637e+12	5.42453e+12	6.45704e+12	6.86406e+12	7.57541e+12	7.72015e+12	8.21187e+12	8.3688e+12	8.47332e+12	8.45997e+12	8.61037e+12	9.13142e+12	9.33941e+12	9.30155e+12
Acid	CAN	4.53585e+11	4.54227e+11	4.54413e+11	5.09657e+11	5.19196e+11	5.10278e+11	5.15328e+11	5.34053e+11	5.36815e+11	4.66215e+11	5.45853e+11	5.59996e+11	5.4398e+11	5.4721e+11	4.55859e+11	4.07051e+11	4.69097e+11	5.00021e+11	2.7591e+11	-9.31571e+11	5.07973e+11
Acid	KOR	4.42554e+11	4.48307e+11	4.78024e+11	5.03973e+11	5.15449e+11	5.45021e+11	6.0159e+11	6.20412e+11	5.94956e+11	5.22763e+11	5.76149e+11	6.25477e+11	6.12456e+11	5.93726e+11	5.76345e+11	5.89216e+11	5.87233e+11	6.48677e+11	6.33591e+11	6.31985e+11	5.81009e+11
Acid	BRA	3.43303e+11	3.51214e+11	3.46799e+11	3.45237e+11	3.35867e+11	3.4686e+11	3.53724e+11	3.79865e+11	4.34272e+11	4.04419e+11	4.94889e+11	5.34448e+11	5.60059e+11	5.99761e+11	6.11194e+11	5.32492e+11	4.83747e+11	5.06461e+11	4.88767e+11	5.06864e+11	4.40998e+11
Acid	IND	9.02046e+11	9.12506e+11	9.47961e+11	9.62665e+11	1.01461e+12	1.08868e+12	1.12912e+12	1.28416e+12	1.31713e+12	1.48408e+12	1.62805e+12	1.7581e+12	1.85388e+12	1.78869e+12	1.99314e+12	2.06508e+12	2.06399e+12	2.24694e+12	2.32999e+12	2.31711e+12	2.12502e+12
Acid	MEX	4.42371e+11	4.3996e+11	4.4509e+11	4.40142e+11	4.51682e+11	4.70789e+11	4.97001e+11	5.06487e+11	5.17526e+11	4.7019e+11	4.90756e+11	5.02671e+11	5.07925e+11	4.95389e+11	4.94934e+11	4.9906e+11	4.98374e+11	5.05934e+11	4.91708e+11	4.8724e+11	3.69649e+11
Acid	RUS	8.64339e+11	9.47768e+11	8.91879e+11	9.44685e+11	9.83066e+11	9.7772e+11	1.08226e+12	1.13769e+12	1.18119e+12	1.04299e+12	1.05645e+12	1.16889e+12	1.1925e+12	1.2058e+12	1.13666e+12	1.07821e+12	1.08811e+12	1.15574e+12	1.14846e+12	1.17286e+12	1.146e+12
Acid	AUS	3.44905e+11	3.43726e+11	3.7447e+11	3.67095e+11	3.9557e+11	4.06446e+11	4.18914e+11	4.39589e+11	4.16489e+11	4.36927e+11	4.28635e+11	4.57422e+11	4.5146e+11	4.41121e+11	4.3565e+11	4.4285e+11	4.24918e+11	4.43952e+11	4.1635e+11	4.26232e+11	3.94297e+11
Acid	CHE	8.92234e+10	8.66997e+10	8.89331e+10	9.18934e+10	9.56263e+10	1.00641e+11	9.62034e+10	9.70826e+10	1.0297e+11	1.06165e+11	1.1402e+11	1.32091e+11	1.19071e+11	1.22016e+11	1.11685e+11	1.20779e+11	1.24166e+11	1.24927e+11	1.20092e+11	1.2513e+11	1.2665e+11
Acid	TUR	2.46122e+11	1.99862e+11	2.18467e+11	2.29693e+11	2.5332e+11	2.80997e+11	3.06513e+11	3.40817e+11	3.32218e+11	2.96761e+11	3.45242e+11	3.87659e+11	3.9945e+11	4.16637e+11	4.71144e+11	4.57005e+11	4.29202e+11	4.64703e+11	4.25736e+11	3.80784e+11	4.04643e+11
Acid	TWN	2.69221e+11	2.75069e+11	2.67532e+11	2.77136e+11	3.13578e+11	3.00846e+11	3.04485e+11	2.85004e+11	2.95306e+11	2.52779e+11	2.9282e+11	2.88753e+11	2.88961e+11	2.87663e+11	2.83813e+11	2.81096e+11	2.86356e+11	2.81974e+11	2.94812e+11	2.86044e+11	2.61729e+11
Acid	NOR	5.32795e+10	5.24765e+10	5.63398e+10	5.76206e+10	5.78009e+10	5.76829e+10	6.27533e+10	6.72831e+10	6.52512e+10	6.50589e+10	6.97739e+10	6.90622e+10	6.77998e+10	7.0371e+10	6.12862e+10	7.15924e+10	6.18612e+10	6.72019e+10	6.42138e+10	6.77935e+10	5.35272e+10
Acid	IDN	2.19196e+11	2.35181e+11	2.6264e+11	2.82659e+11	2.86746e+11	2.8477e+11	3.17319e+11	3.38518e+11	3.75193e+11	3.41545e+11	3.91073e+11	4.47909e+11	4.58693e+11	4.58658e+11	4.92141e+11	4.82997e+11	4.70617e+11	5.29967e+11	5.67084e+11	6.14726e+11	559345512526
Acid	ZAF	2.511e+11	2.50643e+11	2.70535e+11	3.06689e+11	3.41354e+11	3.29724e+11	3.25138e+11	3.43268e+11	3.64463e+11	3.54448e+11	3.60276e+11	3.45208e+11	3.80104e+11	3.7441e+11	3.83979e+11	3.60837e+11	3.46657e+11	3.57915e+11	3.26991e+11	3.72402e+11	3.61542e+11
Acid	WWA	1.21509e+12	1.20493e+12	1.31953e+12	1.33843e+12	1.44427e+12	1.55689e+12	1.64364e+12	1.60561e+12	1.70723e+12	1.76153e+12	2.06964e+12	1.98689e+12	2.29051e+12	2.37516e+12	2.22581e+12	2.1341e+12	2.62799e+12	2.37934e+12	2.83849e+12	2.74061e+12	2.72833e+12
Acid	WWL	5.33417e+11	5.23406e+11	4.7116e+11	4.8213e+11	4.94673e+11	6.00665e+11	6.51878e+11	6.85105e+11	7.44537e+11	6.80945e+11	8.07441e+11	8.69462e+11	9.1791e+11	9.48793e+11	9.28122e+11	9.90013e+11	8.82708e+11	9.04016e+11	8.21078e+11	8.64653e+11	7.32688e+11
Acid	WWE	3.73819e+11	4.03819e+11	4.16937e+11	4.34657e+11	3.87364e+11	3.91719e+11	4.50335e+11	5.07566e+11	4.65299e+11	4.02239e+11	4.11474e+11	4.13891e+11	4.24516e+11	3.88401e+11	3.31627e+11	3.09794e+11	3.07245e+11	2.87257e+11	3.30784e+11	3.06666e+11	2.98643e+11
Acid	WWF	3.19784e+11	3.44725e+11	3.59975e+11	3.8199e+11	4.00528e+11	4.18943e+11	4.37915e+11	5.3455e+11	5.77065e+11	5.87705e+11	6.34033e+11	6.69005e+11	6.83246e+11	7.71146e+11	7.90278e+11	8.24501e+11	8.62361e+11	9.14034e+11	8.60398e+11	9.03675e+11	8.47455e+11
Acid	WWM	1.08058e+12	1.16618e+12	1.22652e+12	1.24037e+12	1.31723e+12	1.44412e+12	1.52865e+12	1.58636e+12	1.86422e+12	1.92323e+12	2.05133e+12	1.99458e+12	2.16245e+12	2.23622e+12	2.26548e+12	2.28056e+12	2.28307e+12	2.23924e+12	2.25601e+12	2.51812e+12	2.34083e+12
Acid	Advanced	1.41832e+13	1.41959e+13	1.42073e+13	1.46635e+13	1.50067e+13	1.52684e+13	1.54531e+13	1.55822e+13	1.4937e+13	1.36489e+13	1.4147e+13	1.41083e+13	1.35612e+13	1.35023e+13	1.34015e+13	1.32507e+13	1.2999e+13	1.32705e+13	1.31686e+13	1.2681e+13	1.17533e+13
Acid	EmergingDeveloping	9.62602e+12	9.98506e+12	1.03558e+13	1.10049e+13	1.18852e+13	1.27093e+13	1.34592e+13	1.44564e+13	1.53049e+13	1.62071e+13	1.76047e+13	1.86541e+13	1.95514e+13	2.02709e+13	2.04933e+13	2.0488e+13	2.0804e+13	2.11019e+13	2.20169e+13	2.25251e+13	2.16567e+13
Acid	Global	2.38092e+13	2.4181e+13	2.45631e+13	2.56683e+13	2.68919e+13	2.79777e+13	2.89122e+13	3.00386e+13	3.02419e+13	2.9856e+13	3.17517e+13	3.27624e+13	3.31126e+13	3.37732e+13	3.38949e+13	3.37387e+13	3.3803e+13	3.43724e+13	3.51855e+13	3.52061e+13	3.341e+13
Biodiversity	AUT	0.000520898	0.000546442	0.000543597	0.000551319	0.000563023	0.000543569	0.000551472	0.000560499	0.000534293	0.000517349	0.000519909	0.00053005	0.000515573	0.000536141	0.000505722	0.000519146	0.00052673	0.000564583	0.000560371	0.000533326	0.000504698
Biodiversity	BEL	0.000891883	0.000899364	0.000847702	0.000895542	0.000923085	0.000888149	0.000980732	0.000950288	0.00107261	0.000981886	0.000808797	0.000726948	0.000744241	0.000759559	0.000766913	0.000682359	0.000751575	0.000787337	0.000807626	0.000760005	0.000698173
Biodiversity	BGR	0.00025023	0.000261925	0.000265138	0.00026828	0.000270232	0.000258101	0.000263053	0.000276636	0.000254942	0.000244156	0.000176866	0.000174111	0.000192289	0.000154977	0.000162442	0.000164575	0.000158238	0.00016646	0.000163854	0.000172905	0.000170381
Biodiversity	CYP	6.35312e-05	6.34876e-05	7.86805e-05	8.16971e-05	8.28087e-05	9.79649e-05	0.000121633	0.000137515	0.000190696	0.000173243	0.000164886	0.000159813	0.000143189	0.000129147	0.000120589	0.000110884	0.000106694	0.000106722	0.00010605	9.41457e-05	8.16217e-05
Biodiversity	CZE	0.000393992	0.00040848	0.000405995	0.00042327	0.000433244	0.000417945	0.000448345	0.00045414	0.000455243	0.000393088	0.000391096	0.000438112	0.000420787	0.00039237	0.000378939	0.000378257	0.000370951	0.000427569	0.000415895	0.000428887	0.000394396
Biodiversity	DEU	0.00476175	0.00448384	0.00439901	0.00469649	0.00496269	0.00478851	0.00494784	0.00497654	0.005023	0.00458967	0.00429717	0.00455854	0.0042939	0.00407516	0.00410486	0.00409705	0.00396474	0.00430534	0.00429689	0.00435317	0.00389962
Biodiversity	DNK	0.000490429	0.000479019	0.000430234	0.000428072	0.000503087	0.000455402	0.000522469	0.000545663	0.000537422	0.000486695	0.000448796	0.000520337	0.0004822	0.000468002	0.000523764	0.00048725	0.000522664	0.000597035	0.000344199	0.000560698	0.000543727
Biodiversity	EST	4.12566e-05	4.63475e-05	4.92061e-05	5.29758e-05	5.55607e-05	5.13868e-05	5.91063e-05	6.30887e-05	5.83976e-05	4.83598e-05	4.16588e-05	4.44286e-05	4.379e-05	4.95811e-05	4.60613e-05	4.80284e-05	4.37683e-05	5.07879e-05	5.72206e-05	4.55468e-05	5.61433e-05
Biodiversity	ESP	0.00374816	0.00390291	0.0040927	0.00403403	0.00415241	0.00433947	0.00406515	0.00419115	0.00400349	0.003582	0.00333644	0.00338157	0.00312192	0.00284645	0.00277815	0.00278535	0.0026787	0.00277601	0.00286897	0.00268877	0.00282306
Biodiversity	FIN	0.000348737	0.000345529	0.000319657	0.000388401	0.000396484	0.000403306	0.000429978	0.000426336	0.00041	0.000398058	0.000365595	0.000387683	0.000383853	0.000387149	0.000362282	0.000343554	0.000347489	0.000357503	0.000360649	0.00035291	0.000304819
Biodiversity	FRA	0.00356792	0.00362714	0.00356492	0.0036751	0.00366543	0.00365081	0.00368049	0.00363631	0.0035117	0.00321808	0.00309676	0.00320259	0.00328018	0.0031721	0.00312821	0.00305661	0.00310665	0.00321672	0.00326735	0.00321213	0.00289139
Biodiversity	GRC	0.00183386	0.00168618	0.00152854	0.00163822	0.00174505	0.00181258	0.00187947	0.0023458	0.0019187	0.00198471	0.00202094	0.00175118	0.0015564	0.00150439	0.00146108	0.00107404	0.00104492	0.00126107	0.00137659	0.000892409	0.00141436
Biodiversity	HRV	0.00013286	0.000141341	0.000155522	0.000170561	0.000177679	0.000168664	0.000170862	0.000172851	0.00018421	0.000161748	0.000144003	0.00013986	0.000129299	0.000127693	0.000119655	0.000114223	0.000116251	0.000121734	0.000126442	0.000128618	0.000123097
Biodiversity	HUN	0.000334813	0.000326285	0.000349349	0.00035096	0.000400197	0.00038071	0.000339191	0.000348443	0.000338637	0.000291924	0.000232839	0.000267786	0.000245712	0.000244878	0.000244239	0.000233567	0.000256668	0.000254944	0.000251962	0.000251161	0.000230648
Biodiversity	IRL	0.000411231	0.000449802	0.000428987	0.000448925	0.000421123	0.000447832	0.000488267	0.000518819	0.000486975	0.000476729	0.000323987	0.000310139	0.000264685	0.000315654	0.000361802	0.000346472	0.000460456	0.000569141	0.000533241	0.000754281	0.000510422
Biodiversity	ITA	0.00447294	0.00437414	0.00446395	0.00456624	0.00475547	0.00458273	0.00491934	0.0048233	0.00465759	0.004428	0.00430701	0.0042732	0.00388772	0.00368751	0.00344433	0.00361613	0.00358184	0.00371858	0.00365067	0.00337095	0.00309281
Biodiversity	LTU	3.211e-05	3.29227e-05	4.18626e-05	4.16797e-05	5.07458e-05	6.23148e-05	7.16862e-05	7.81445e-05	9.3438e-05	6.24961e-05	5.82545e-05	6.71262e-05	8.98132e-05	6.19185e-05	7.21046e-05	6.49605e-05	6.33145e-05	6.4251e-05	7.55855e-05	8.27076e-05	7.1282e-05
Biodiversity	LUX	7.28351e-05	7.75486e-05	6.58464e-05	7.26138e-05	8.47772e-05	8.71645e-05	9.02273e-05	8.90072e-05	9.44864e-05	8.71097e-05	8.16532e-05	8.4652e-05	8.70524e-05	9.46138e-05	0.000109146	9.2179e-05	0.000107191	9.62141e-05	9.39255e-05	0.000132771	0.000116871
Biodiversity	LVA	4.37304e-05	4.86801e-05	4.87808e-05	5.31822e-05	5.75227e-05	5.80574e-05	8.00585e-05	0.000103515	8.3621e-05	5.2194e-05	4.29314e-05	5.59735e-05	9.93522e-05	5.42459e-05	6.46831e-05	6.21296e-05	6.70462e-05	8.47761e-05	7.62195e-05	8.2372e-05	9.4185e-05
Biodiversity	MLT	2.42579e-05	2.45322e-05	2.2434e-05	2.48062e-05	2.51876e-05	2.24158e-05	2.16375e-05	2.11506e-05	2.16741e-05	1.96911e-05	1.92024e-05	1.82138e-05	1.92566e-05	1.76859e-05	1.75573e-05	1.58204e-05	1.76355e-05	1.72108e-05	2.22165e-05	2.50618e-05	2.17564e-05
Biodiversity	NLD	0.00169993	0.00164766	0.0016371	0.00171157	0.00186229	0.00167983	0.00165486	0.00173993	0.00160519	0.00152685	0.00105279	0.00116042	0.0011566	0.00111848	0.0011567	0.0013924	0.00118699	0.00139767	0.0013531	0.00135292	0.00123755
Biodiversity	POL	0.00111422	0.00111551	0.00108428	0.00109875	0.00109489	0.00116089	0.00117424	0.00128912	0.0013227	0.00118353	0.00126963	0.00126735	0.00121658	0.00116303	0.00112809	0.00114119	0.00113824	0.00122007	0.00122268	0.00120015	0.00122258
Biodiversity	PRT	0.000633704	0.000641714	0.000658638	0.00066111	0.000644738	0.000610337	0.000597156	0.000649077	0.000643655	0.000580644	0.000585499	0.000532633	0.000466533	0.000456748	0.000449656	0.000469607	0.000443704	0.000461948	0.000489066	0.000478594	0.000459037
Biodiversity	ROM	0.00036267	0.000376219	0.000366956	0.000403999	0.000436206	0.000408712	0.000435277	0.00048637	0.000492402	0.000438686	0.000431242	0.000458159	0.000362435	0.000352909	0.000372404	0.00035322	0.00036376	0.000407425	0.000427151	0.000436492	0.000427682
Biodiversity	SWE	0.000519954	0.000490969	0.00048414	0.000520047	0.000529349	0.000523181	0.000537561	0.000557844	0.000539397	0.000506485	0.000555548	0.000567808	0.000574441	0.000584412	0.000579785	0.000558452	0.000550636	0.000586854	0.000555359	0.000533207	0.000520292
Biodiversity	SVN	0.000188766	0.000179558	0.00017825	0.000186039	0.000191489	0.000174778	0.000169337	0.000168076	0.00017084	0.000150696	0.000143009	0.000138692	0.00012737	0.000118144	0.000115258	0.000115485	0.000102434	0.000108754	0.000111102	0.000110316	0.00011682
Biodiversity	SVK	0.000116837	0.000118837	0.00012474	0.000131017	0.000142173	0.000145102	0.000151545	0.000169098	0.000185995	0.000161879	0.000143073	0.000149179	0.000141779	0.000139932	0.000150969	0.000151991	0.000138409	0.000158483	0.000156735	0.000170167	0.000153453
Biodiversity	GBR	0.0046094	0.00455674	0.00471045	0.00468403	0.00504652	0.00522594	0.0051163	0.00449394	0.00434781	0.00375079	0.00366567	0.0038218	0.00378325	0.00372655	0.00378233	0.00439141	0.00354576	0.00368264	0.00377853	0.00372228	0.00319309
Biodiversity	USA	0.06732	0.0642638	0.0657302	0.0653566	0.0632238	0.0647295	0.0637571	0.0590074	0.056701	0.0514251	0.0557992	0.0575828	0.0593109	0.0579356	0.056012	0.0548221	0.0558626	0.0557884	0.0546001	0.0545462	0.0544307
Biodiversity	JPN	0.0110296	0.0105186	0.00965868	0.00980683	0.0100133	0.0105331	0.0106679	0.010459	0.0107679	0.00916669	0.00931182	0.0103976	0.0105609	0.00897488	0.00835009	0.00757028	0.00692587	0.00761692	0.00735928	0.00747004	0.00681132
Biodiversity	CHN	0.0253683	0.0258544	0.0263269	0.0272928	0.0299467	0.0314625	0.0329342	0.0339314	0.0353182	0.0391346	0.0403603	0.044854	0.0486349	0.050809	0.0529704	0.0587908	0.0566155	0.0574055	0.062663	0.0663601	0.0695445
Biodiversity	CAN	0.00261195	0.00265726	0.0025942	0.00286076	0.00284191	0.00299373	0.00311259	0.00329798	0.00314022	0.00311884	0.00321887	0.00366695	0.00365968	0.00344362	0.00305321	0.0030263	0.00285796	0.00314082	0.0028445	0.00185807	0.00303081
Biodiversity	KOR	0.002875	0.00280669	0.00330368	0.00313943	0.00328585	0.0035567	0.00392985	0.00444349	0.00404959	0.00321053	0.00380044	0.00459703	0.00458762	0.00415469	0.00377384	0.00372361	0.00374296	0.0042161	0.00425696	0.00394057	0.00375125
Biodiversity	BRA	0.0266631	0.0249817	0.0261362	0.0276453	0.0266801	0.0273006	0.0265474	0.0265375	0.0267303	0.0268374	0.0266639	0.0272047	0.0255686	0.0264706	0.0250198	0.0217315	0.0257455	0.0256048	0.0212097	0.0212754	0.0176041
Biodiversity	IND	0.0298281	0.03059	0.0285479	0.0300633	0.0297059	0.0311449	0.0324934	0.0336484	0.0341538	0.0345386	0.0360446	0.0355076	0.0370226	0.0366362	0.0375675	0.0411533	0.0443488	0.0472123	0.0460293	0.0487975	0.0489293
Biodiversity	MEX	0.0365787	0.0376091	0.0367013	0.0349512	0.0333225	0.0356258	0.0356193	0.0340289	0.0343391	0.0351697	0.0329988	0.0330693	0.0342715	0.0324546	0.0304035	0.0298252	0.02778	0.029594	0.0308166	0.0308194	0.0258367
Biodiversity	RUS	0.00328921	0.00341495	0.00287153	0.00314077	0.00408343	0.00375955	0.0042034	0.00422485	0.00468163	0.00421253	0.00480107	0.00516846	0.00558838	0.00592604	0.00520687	0.00432511	0.0039787	0.00434274	0.00435341	0.00465352	0.00437127
Biodiversity	AUS	0.00981905	0.0119148	0.0120654	0.0112482	0.00971567	0.010096	0.010625	0.00899316	0.00672375	0.00810766	0.00648973	0.00681661	0.00768112	0.007698	0.00749283	0.00734211	0.006644	0.00754219	0.00650088	0.00590381	0.00639172
Biodiversity	CHE	0.000658819	0.000649718	0.00071884	0.000688597	0.00079095	0.000677956	0.000637131	0.000620421	0.000713487	0.000712234	0.000704641	0.000880033	0.000762043	0.000871141	0.000817562	0.000885288	0.000931207	0.000989318	0.000939685	0.000952869	0.00104761
Biodiversity	TUR	0.00370889	0.00335078	0.00357052	0.00375065	0.00355116	0.00406804	0.00417722	0.00433274	0.00421594	0.00362601	0.00442493	0.00441646	0.00461582	0.00441824	0.00469629	0.00469447	0.00475417	0.0047152	0.00440053	0.00445989	0.00442336
Biodiversity	TWN	0.00144209	0.00122501	0.00112596	0.00112718	0.00121764	0.00118747	0.001183	0.00106034	0.00107652	0.00089959	0.00115944	0.00117175	0.0010799	0.00112646	0.00101884	0.000960618	0.000937079	0.000926434	0.000965617	0.000941838	0.000851085
Biodiversity	NOR	0.000374203	0.000402961	0.000414375	0.000405568	0.000415053	0.000418181	0.000456062	0.000489085	0.000490048	0.000443675	0.000453474	0.000466167	0.000457162	0.00046293	0.000371806	0.000439352	0.000383343	0.000438057	0.000417286	0.000429552	0.000344523
Biodiversity	IDN	0.00969781	0.00978006	0.0104581	0.0106623	0.0110062	0.0112006	0.0114348	0.0120365	0.0125427	0.0124444	0.0135194	0.0136435	0.0135087	0.0137683	0.0140875	0.0133667	0.0139457	0.013643	0.0147766	0.0144334	0.0138963
Biodiversity	ZAF	0.00427507	0.00407266	0.00407617	0.00458607	0.00476677	0.00453493	0.00437747	0.00478146	0.00439569	0.00438233	0.0044033	0.00418685	0.00490941	0.00456711	0.00442889	0.00421126	0.00373203	0.00471992	0.00406526	0.00454361	0.00454041
Biodiversity	WWA	0.0228265	0.020943	0.0233036	0.0218227	0.023082	0.0233748	0.021592	0.0218958	0.0229254	0.0266444	0.02715	0.0251659	0.0289814	0.0297068	0.028095	0.0281514	0.0343952	0.0303638	0.0350999	0.0307764	0.0335989
Biodiversity	WWL	0.00910709	0.0100851	0.00933461	0.00893366	0.00870686	0.00946541	0.0109417	0.0119007	0.0123004	0.0119671	0.0122104	0.0122671	0.0136109	0.0141158	0.0136839	0.0134125	0.0118279	0.0118543	0.0103646	0.00986624	0.00999668
Biodiversity	WWE	0.00405323	0.0045018	0.00356778	0.00433459	0.00377676	0.00353968	0.00408339	0.00438204	0.00364958	0.0033401	0.00317147	0.00302784	0.00293752	0.0034847	0.00285029	0.002899	0.00295051	0.00274736	0.00269224	0.00303268	0.00295744
Biodiversity	WWF	0.0199096	0.0202905	0.0212358	0.0215425	0.021796	0.0220508	0.0220342	0.0232043	0.0232876	0.023732	0.0240502	0.0261608	0.0263573	0.0274829	0.0279318	0.0284876	0.028772	0.0282065	0.0272224	0.0283935	0.0284056
Biodiversity	WWM	0.0112974	0.0119688	0.0119659	0.0108149	0.0116934	0.0118331	0.0134709	0.0143693	0.0159901	0.0170259	0.0172329	0.0185578	0.0198916	0.0199026	0.0196149	0.0197216	0.0197761	0.0199609	0.0199469	0.0211768	0.0199235
Biodiversity	Advanced	0.127814	0.125792	0.126958	0.126892	0.125178	0.127638	0.128336	0.122644	0.116902	0.107581	0.109663	0.114767	0.11593	0.111407	0.107398	0.105636	0.104048	0.108226	0.105434	0.10297	0.102033
Biodiversity	EmergingDeveloping	0.206603	0.207443	0.208096	0.209541	0.212118	0.219361	0.223909	0.229274	0.23453	0.243055	0.247031	0.25323	0.265899	0.269743	0.266557	0.27077	0.278622	0.28037	0.28364	0.288589	0.284028
Biodiversity	Global	0.334417	0.333235	0.335054	0.336433	0.337296	0.346999	0.352245	0.351917	0.351432	0.350636	0.356694	0.367998	0.381828	0.38115	0.373954	0.376407	0.38267	0.388596	0.389074	0.391558	0.386061
Climate	AUT	1.11569e+11	1.18206e+11	1.22355e+11	1.2651e+11	1.2727e+11	1.27286e+11	1.2754e+11	1.28102e+11	1.26404e+11	1.2004e+11	1.17628e+11	1.16896e+11	1.12229e+11	1.13654e+11	1.10458e+11	1.10006e+11	1.0843e+11	1.14895e+11	1.15012e+11	1.10872e+11	9.99397e+10
Climate	BEL	1.71059e+11	1.68605e+11	1.62277e+11	1.74556e+11	1.68908e+11	1.74863e+11	1.88955e+11	1.87185e+11	2.05444e+11	1.88235e+11	1.6548e+11	1.58651e+11	1.50019e+11	1.52742e+11	1.55844e+11	1.54412e+11	1.49128e+11	1.55974e+11	1.61835e+11	1.52623e+11	1.41531e+11
Climate	BGR	5.40088e+10	5.74378e+10	5.64319e+10	6.18591e+10	5.69514e+10	5.82733e+10	5.87114e+10	6.36296e+10	5.53214e+10	5.19191e+10	4.48586e+10	4.7313e+10	4.65543e+10	4.30296e+10	4.30368e+10	4.21208e+10	4.15439e+10	4.19687e+10	3.84926e+10	4.06112e+10	3.85754e+10
Climate	CYP	8.80142e+09	8.65585e+09	9.83977e+09	1.06658e+10	1.09792e+10	1.1942e+10	1.3533e+10	1.47788e+10	1.83196e+10	1.6722e+10	1.65108e+10	1.57843e+10	1.41078e+10	1.23368e+10	1.21657e+10	1.13997e+10	1.21086e+10	1.32131e+10	1.31117e+10	1.52232e+10	1.27406e+10
Climate	CZE	1.34067e+11	1.3523e+11	1.32014e+11	1.42895e+11	1.30279e+11	1.26447e+11	1.41101e+11	1.38044e+11	1.39906e+11	1.23184e+11	1.31738e+11	1.35257e+11	1.22999e+11	1.19891e+11	1.14669e+11	1.15236e+11	1.04314e+11	1.19483e+11	1.09164e+11	1.22169e+11	1.03687e+11
Climate	DEU	1.2767e+12	1.23302e+12	1.19291e+12	1.25117e+12	1.23477e+12	1.21788e+12	1.23413e+12	1.20183e+12	1.24282e+12	1.14485e+12	1.12341e+12	1.15791e+12	1.10603e+12	1.09985e+12	1.08607e+12	1.04957e+12	1.06368e+12	1.09042e+12	1.06801e+12	1.05521e+12	9.29736e+11
Climate	DNK	9.26131e+10	9.10115e+10	8.65419e+10	9.03481e+10	9.49724e+10	8.86512e+10	9.6766e+10	1.01011e+11	9.53784e+10	8.46043e+10	7.99399e+10	8.25762e+10	7.60437e+10	7.8769e+10	7.76316e+10	8.00501e+10	8.66957e+10	8.07297e+10	6.43324e+10	8.80594e+10	7.49459e+10
Climate	EST	1.79489e+10	1.83041e+10	1.77202e+10	2.00001e+10	1.97092e+10	1.8656e+10	2.12302e+10	2.27087e+10	1.92511e+10	1.59184e+10	1.70729e+10	1.66011e+10	1.51825e+10	1.73674e+10	1.64812e+10	1.51016e+10	1.45212e+10	1.5909e+10	1.52662e+10	1.28409e+10	1.26876e+10
Climate	ESP	4.46879e+11	4.57422e+11	4.85126e+11	4.94864e+11	5.27881e+11	5.49168e+11	5.60968e+11	5.92215e+11	5.38669e+11	4.57586e+11	4.33676e+11	4.33685e+11	3.944e+11	3.68519e+11	3.83053e+11	3.86415e+11	3.71743e+11	3.94644e+11	3.78204e+11	3.75252e+11	3.24047e+11
Climate	FIN	8.149e+10	8.36744e+10	7.83088e+10	1.0077e+11	9.22558e+10	9.34922e+10	1.04147e+11	1.02035e+11	9.74264e+10	8.90189e+10	9.41311e+10	9.4232e+10	8.28374e+10	8.28011e+10	7.64871e+10	6.88106e+10	7.16447e+10	7.22729e+10	7.47603e+10	7.09086e+10	5.76449e+10
Climate	FRA	6.70429e+11	6.64722e+11	6.64747e+11	6.93856e+11	7.15073e+11	7.19559e+11	7.22299e+11	7.11316e+11	7.06136e+11	6.5433e+11	6.45913e+11	6.38119e+11	6.35622e+11	6.24451e+11	5.98593e+11	5.87041e+11	5.96117e+11	6.29477e+11	6.15635e+11	6.02872e+11	5.24072e+11
Climate	GRC	1.42665e+11	1.41081e+11	1.46152e+11	1.56714e+11	1.5653e+11	1.656e+11	1.73227e+11	2.00745e+11	1.8186e+11	1.72924e+11	1.73581e+11	1.52122e+11	1.33586e+11	1.25926e+11	1.28824e+11	1.01826e+11	9.61639e+10	1.0873e+11	1.16757e+11	8.80992e+10	1.07134e+11
Climate	HRV	2.60329e+10	2.7825e+10	3.12712e+10	3.50531e+10	3.54097e+10	3.59652e+10	3.60376e+10	3.63828e+10	3.80883e+10	3.32212e+10	3.04537e+10	2.99022e+10	2.63959e+10	2.69615e+10	2.5658e+10	2.50514e+10	2.56877e+10	2.74019e+10	2.7295e+10	2.83916e+10	2.68875e+10
Climate	HUN	6.84041e+10	7.13479e+10	7.49433e+10	8.57332e+10	8.75683e+10	8.44786e+10	8.52073e+10	8.46915e+10	8.58503e+10	7.18799e+10	6.98507e+10	6.83112e+10	6.38299e+10	6.47994e+10	6.3976e+10	6.43739e+10	6.34843e+10	6.53013e+10	6.94357e+10	7.37559e+10	6.36624e+10
Climate	IRL	7.25046e+10	7.92808e+10	8.399e+10	9.42146e+10	9.03751e+10	9.8499e+10	1.05341e+11	1.10939e+11	1.05715e+11	9.76221e+10	7.48344e+10	7.16684e+10	6.42822e+10	6.39031e+10	7.53898e+10	6.97876e+10	7.99735e+10	1.01018e+11	9.17058e+10	1.55116e+11	9.72255e+10
Climate	ITA	7.00517e+11	6.86719e+11	7.17304e+11	7.41014e+11	7.65615e+11	7.61135e+11	7.88719e+11	7.65879e+11	7.43174e+11	6.79769e+11	7.12166e+11	6.87415e+11	6.19529e+11	5.82538e+11	5.67238e+11	5.66213e+11	5.51065e+11	5.55603e+11	5.64586e+11	5.37163e+11	4.74249e+11
Climate	LTU	1.92754e+10	1.92927e+10	2.02732e+10	2.03161e+10	2.20767e+10	2.50347e+10	2.59353e+10	2.89056e+10	2.90009e+10	2.24649e+10	2.33859e+10	2.49228e+10	2.51749e+10	2.20201e+10	2.32129e+10	2.16128e+10	2.06465e+10	2.04892e+10	2.14872e+10	2.36185e+10	1.88697e+10
Climate	LUX	1.26437e+10	1.53856e+10	1.52166e+10	1.68566e+10	1.89582e+10	1.93685e+10	1.88666e+10	1.8867e+10	1.94559e+10	1.80223e+10	1.6717e+10	1.63758e+10	1.68239e+10	1.77286e+10	2.05539e+10	1.81376e+10	1.95551e+10	1.8664e+10	1.78426e+10	2.09353e+10	2.00839e+10
Climate	LVA	1.22805e+10	1.27685e+10	1.31602e+10	1.39959e+10	1.4637e+10	1.46747e+10	1.83132e+10	2.02928e+10	1.8964e+10	1.31915e+10	1.29749e+10	1.46832e+10	1.31397e+10	1.33903e+10	1.51423e+10	1.38173e+10	1.2797e+10	1.35027e+10	1.35779e+10	1.42527e+10	1.24512e+10
Climate	MLT	3.25554e+09	3.38963e+09	3.05332e+09	3.47588e+09	3.55296e+09	3.7217e+09	3.61279e+09	3.61649e+09	3.68733e+09	3.41246e+09	3.39228e+09	3.36546e+09	3.51045e+09	3.0059e+09	2.86187e+09	2.75208e+09	3.29075e+09	3.38314e+09	3.82346e+09	5.44338e+09	4.12808e+09
Climate	NLD	2.74965e+11	2.70982e+11	2.73478e+11	2.85441e+11	2.96358e+11	2.83215e+11	2.90302e+11	2.92799e+11	2.92478e+11	2.6712e+11	2.4664e+11	2.47977e+11	2.38611e+11	2.40464e+11	2.28855e+11	2.59862e+11	2.25621e+11	2.51671e+11	2.45591e+11	2.63673e+11	2.27706e+11
Climate	POL	3.56151e+11	3.57588e+11	3.53094e+11	3.5294e+11	3.46138e+11	3.56941e+11	3.57021e+11	3.80428e+11	3.95318e+11	3.58499e+11	3.78712e+11	3.65512e+11	3.50962e+11	3.39528e+11	3.30976e+11	3.22402e+11	3.29636e+11	3.47393e+11	3.52472e+11	3.35166e+11	3.1984e+11
Climate	PRT	9.90448e+10	9.8768e+10	1.02381e+11	1.00735e+11	1.05464e+11	1.07634e+11	9.95756e+10	9.94414e+10	9.94143e+10	9.12972e+10	8.86869e+10	8.13744e+10	7.06778e+10	6.66409e+10	6.97121e+10	6.78271e+10	6.84327e+10	6.90627e+10	7.03721e+10	6.82348e+10	6.38112e+10
Climate	ROM	1.08447e+11	1.14152e+11	1.13933e+11	1.25652e+11	1.21276e+11	1.29314e+11	1.3349e+11	1.37917e+11	1.3564e+11	1.11346e+11	1.04844e+11	1.16246e+11	1.05677e+11	9.20691e+10	9.1951e+10	9.45506e+10	9.65867e+10	1.02472e+11	1.09304e+11	1.08522e+11	1.04549e+11
Climate	SWE	1.12878e+11	1.05881e+11	1.07055e+11	1.19825e+11	1.16236e+11	1.13102e+11	1.13334e+11	1.14563e+11	1.12866e+11	9.91786e+10	1.04766e+11	1.05991e+11	9.5572e+10	9.87526e+10	9.7924e+10	9.89042e+10	9.70518e+10	9.78072e+10	9.7629e+10	9.85708e+10	8.62627e+10
Climate	SVN	2.13094e+10	1.96591e+10	2.00178e+10	2.28442e+10	2.20743e+10	2.16007e+10	2.16103e+10	2.32587e+10	2.64873e+10	2.12334e+10	2.14955e+10	2.19016e+10	1.96777e+10	1.85566e+10	1.79304e+10	1.81616e+10	1.71758e+10	1.82952e+10	1.73004e+10	1.92005e+10	1.85787e+10
Climate	SVK	4.67971e+10	4.55787e+10	4.55269e+10	4.59561e+10	4.50486e+10	4.6883e+10	4.7462e+10	5.31773e+10	5.85268e+10	4.91969e+10	4.83654e+10	4.74751e+10	4.15398e+10	4.33657e+10	4.19427e+10	4.24919e+10	4.32984e+10	4.56311e+10	4.83246e+10	4.85378e+10	4.34321e+10
Climate	GBR	918891508274	9.24594e+11	9.35322e+11	9.4687e+11	9.85252e+11	9.89248e+11	1.04528e+12	1.00707e+12	9.43828e+11	8.18058e+11	8.3871e+11	8.23794e+11	8.22285e+11	8.12586e+11	8.14087e+11	8.19239e+11	7.55218e+11	7.60181e+11	7.50122e+11	7.61478e+11	6.11639e+11
Climate	USA	7.80889e+12	7.86394e+12	7.78143e+12	7.89648e+12	8.09666e+12	8.22829e+12	8165860004143	8.1609e+12	7.60096e+12	7.05942e+12	7.34982e+12	7.12955e+12	6.80405e+12	6.87556e+12	7.05312e+12	7.0696e+12	6.81003e+12	6.86086e+12	7.04689e+12	7.75586e+12	6.18412e+12
Climate	JPN	1.80052e+12	1.75425e+12	1.72379e+12	1.77302e+12	1.76867e+12	1.81144e+12	1.82374e+12	1.77744e+12	1.7508e+12	1.56978e+12	1.64089e+12	1.81525e+12	1.8153e+12	1.70711e+12	1.66797e+12	1.56518e+12	1.4911e+12	1.53582e+12	1.4865e+12	1.50293e+12	1.35644e+12
Climate	CHN	3.82079e+12	4.03354e+12	4.20401e+12	4.72007e+12	5.42892e+12	5.81755e+12	6.08826e+12	6.59112e+12	6.87308e+12	8.08374e+12	8.50571e+12	9.37641e+12	9.56045e+12	1.01194e+13	1.036e+13	1.05409e+13	1.04229e+13	1.06834e+13	1.14135e+13	1.16575e+13	1.16818e+13
Climate	CAN	5.55608e+11	5.52426e+11	5.59875e+11	6.3065e+11	6.28822e+11	6.26034e+11	6.36824e+11	6.54469e+11	6.55422e+11	5.74697e+11	6.56672e+11	6.80382e+11	6.70955e+11	6.70649e+11	5.70223e+11	5.19991e+11	5.75433e+11	6.13656e+11	3.85292e+11	-8.19845e+11	6.1529e+11
Climate	KOR	5.8054e+11	5.76912e+11	6.16899e+11	6.5679e+11	6.51214e+11	6.86195e+11	7.64099e+11	7.84001e+11	7.37219e+11	6.38652e+11	7.12013e+11	7.91812e+11	7.64798e+11	7.27521e+11	7.10906e+11	7.17316e+11	7.08517e+11	7.96835e+11	7.78239e+11	7.6853e+11	7.09343e+11
Climate	BRA	8.48181e+11	8.6915e+11	8.95677e+11	9.18184e+11	8.9942e+11	9.2111e+11	9.1502e+11	9.51771e+11	1.00672e+12	9.62916e+11	1.08322e+12	1.11725e+12	1.11819e+12	1.16171e+12	1.17819e+12	1.06864e+12	1.06195e+12	1.08711e+12	1.00448e+12	1.0191e+12	9.04363e+11
Climate	IND	1.6519e+12	1.64596e+12	1.66224e+12	1.73721e+12	1.77959e+12	1.8812e+12	1.95814e+12	2.10722e+12	2.18638e+12	2.35981e+12	2.54311e+12	2.67886e+12	2.74136e+12	2.67148e+12	2.87499e+12	2.9678e+12	2.96853e+12	3.22607e+12	3.30429e+12	3.30411e+12	3.08408e+12
Climate	MEX	6.27321e+11	6.29308e+11	6.4028e+11	6.22406e+11	6.26243e+11	6.57164e+11	6.86457e+11	6.99361e+11	7.15483e+11	6.53535e+11	6.76812e+11	6.90982e+11	6.94841e+11	6.82434e+11	6.82788e+11	6.87641e+11	6.85375e+11	7.01659e+11	6.8641e+11	6.82603e+11	5.52222e+11
Climate	RUS	1.08015e+12	1.17791e+12	1.09818e+12	1.15517e+12	1.25912e+12	1.24191e+12	1.35141e+12	1.41809e+12	1.46459e+12	1.33386e+12	1.32265e+12	1.45289e+12	1.4852e+12	1.50743e+12	1.42783e+12	1.34151e+12	1.35796e+12	1.44533e+12	1.42299e+12	1.45753e+12	1.44633e+12
Climate	AUS	4.82586e+11	5.11143e+11	5.40103e+11	4.9225e+11	5.45523e+11	5.41453e+11	5.71977e+11	5.95278e+11	5.3959e+11	5.67908e+11	5.40677e+11	6.1713e+11	6.20066e+11	5.64305e+11	5.71933e+11	5.87327e+11	5.29879e+11	5.83144e+11	5.26695e+11	5.3141e+11	5.00954e+11
Climate	CHE	1.12998e+11	1.09572e+11	1.13377e+11	1.17687e+11	1.20333e+11	1.27193e+11	1.2069e+11	1.21833e+11	1.29685e+11	1.32804e+11	1.41203e+11	1.64777e+11	1.49529e+11	1.51998e+11	1.3872e+11	1.4829e+11	1.50542e+11	1.52966e+11	1.44429e+11	1.53233e+11	1.56333e+11
Climate	TUR	3.13455e+11	2.60633e+11	2.89495e+11	3.06166e+11	3.26917e+11	3.6346e+11	3.95291e+11	4.35608e+11	4.26963e+11	3.79898e+11	4.57465e+11	5.07913e+11	5.14117e+11	5.36463e+11	5.95573e+11	5.84317e+11	5.58927e+11	6.00598e+11	5.63953e+11	5.1439e+11	5.43967e+11
Climate	TWN	4.41207e+11	3.8568e+11	3.74588e+11	3.61277e+11	3.95097e+11	3.67567e+11	3.56211e+11	3.32963e+11	3.41571e+11	2.89689e+11	3.32692e+11	3.24472e+11	3.22697e+11	3.24236e+11	3.18988e+11	3.13827e+11	3.16193e+11	3.12472e+11	3.26843e+11	3.2024e+11	2.91746e+11
Climate	NOR	7.14539e+10	6.94846e+10	7.52667e+10	7.72185e+10	7.56172e+10	7.47361e+10	8.11998e+10	8.49139e+10	8.31222e+10	8.26833e+10	8.72689e+10	8.78747e+10	8.6129e+10	8.93987e+10	7.84994e+10	8.96165e+10	7.82167e+10	8.63467e+10	8.12502e+10	8.71989e+10	7.0729e+10
Climate	IDN	3.43967e+11	3.58251e+11	3.975e+11	4.22754e+11	4.43659e+11	4.32669e+11	4.86599e+11	5.1917e+11	5.6844e+11	5.24264e+11	5.88854e+11	6.82522e+11	7.25937e+11	7.23847e+11	7.90615e+11	7.72072e+11	7.52975e+11	8.45837e+11	8.94105e+11	9.88498e+11	9.01995e+11
Climate	ZAF	3.32414e+11	3.28476e+11	3.54176e+11	3.90311e+11	4.29807e+11	4.05925e+11	3.82664e+11	4.23e+11	4.42454e+11	4.32945e+11	4.30753e+11	4.13793e+11	4.84758e+11	4.75415e+11	4.77073e+11	4.52561e+11	4.24911e+11	4.59828e+11	4.17748e+11	4.66123e+11	4.59506e+11
Climate	WWA	2.03614e+12	1.97229e+12	2.14001e+12	2.12354e+12	2.3038e+12	2.42513e+12	2.41693e+12	2.43887e+12	2.5329e+12	2.75375e+12	3.10454e+12	2.90457e+12	3.35587e+12	3.4245e+12	3.22934e+12	3.08259e+12	3.89599e+12	3.42659e+12	4.14697e+12	3.84086e+12	4.00096e+12
Climate	WWL	9.20628e+11	9.6337e+11	8.9872e+11	8.98146e+11	8.86566e+11	1.03111e+12	1.14515e+12	1.21877e+12	1.29049e+12	1.18588e+12	1.32577e+12	1.39261e+12	1.46814e+12	1.51361e+12	1.4927e+12	1.52696e+12	1.36593e+12	1.40271e+12	1.25165e+12	1.30951e+12	1.2049e+12
Climate	WWE	4.89615e+11	5.33675e+11	5.36414e+11	5.55969e+11	5.02765e+11	5.0605e+11	5.77663e+11	6.30498e+11	5.95928e+11	5.07611e+11	5.17562e+11	5.13184e+11	5.32061e+11	4.97075e+11	4.25453e+11	4.00197e+11	3.9828e+11	3.78049e+11	4.24324e+11	3.99128e+11	3.94589e+11
Climate	WWF	1.09565e+12	1.12769e+12	1.18196e+12	1.25384e+12	1.2651e+12	1.32068e+12	1.33464e+12	1.51826e+12	1.51704e+12	1.54671e+12	1.63997e+12	1.74075e+12	1.74731e+12	1.89197e+12	1.93796e+12	1.96508e+12	2.07921e+12	2.08255e+12	2.05905e+12	2.17826e+12	2.12309e+12
Climate	WWM	1.59329e+12	1.67628e+12	1.72679e+12	1.73633e+12	1.82556e+12	1.99598e+12	2.12068e+12	2.16303e+12	2.5088e+12	2.57132e+12	2.73236e+12	2.71223e+12	2.90196e+12	2.93521e+12	2.99805e+12	3.06564e+12	3.1123e+12	3.07932e+12	3.05483e+12	3.36702e+12	3.20302e+12
Climate	Advanced	1.79154e+13	1.7854e+13	1.78498e+13	1.83405e+13	1.86936e+13	1.89055e+13	1.91533e+13	1.91536e+13	1.83738e+13	1.67905e+13	1.72812e+13	1.73873e+13	1.67008e+13	1.64564e+13	1.64011e+13	1.62383e+13	1.57855e+13	1.62777e+13	1.60476e+13	1.55964e+13	1.45051e+13
Climate	EmergingDeveloping	1.51535e+13	1.55765e+13	1.60255e+13	1.68401e+13	1.79775e+13	1.89999e+13	1.98589e+13	2.11148e+13	2.21293e+13	2.32962e+13	2.49288e+13	2.6184e+13	2.73302e+13	2.81405e+13	2.84705e+13	2.84559e+13	2.90852e+13	2.94191e+13	3.06443e+13	3.11846e+13	3.05009e+13
Climate	Global	3.30689e+13	3.34305e+13	3.38752e+13	3.51806e+13	3.6671e+13	3.79055e+13	3.90122e+13	4.02684e+13	4.05031e+13	4.00867e+13	4.22099e+13	4.35713e+13	4.4031e+13	4.45969e+13	4.48716e+13	4.46942e+13	4.48707e+13	4.56968e+13	4.66919e+13	4.6781e+13	4.50059e+13
Land	AUT	39752.2	41007.8	42064.5	42149.3	40524.9	38453.4	38861.1	38842.7	37546.1	39332.9	39419.8	39421.6	37598.2	38345.2	37269	39010.9	38586.3	39016.6	38892.4	35675.3	36261.9
Land	BEL	66162.4	57354.4	55987.1	60083.8	59150.3	57537.9	60035.8	55899.3	68416.8	65824.5	56038.8	44336	47286.9	55575.4	48210	41216.5	52574.3	58953.1	55392	49146	44615.9
Land	BGR	35804	37158.5	38312.5	38779.7	38227.1	35543.6	34245.6	32166.3	30038.5	30358.4	19730.3	18446.5	22585.2	14880	16733.7	17400.7	16114.2	17824.8	16312.1	16824.9	18102
Land	CYP	433.35	394.701	420.66	460.355	481.242	497.948	505.266	496.027	878.071	521.062	455.638	448.929	497.069	380.766	451.691	701.806	646.213	843.45	1151.23	1151.48	1274.15
Land	CZE	43298	41146.2	44691.9	46466.1	45365.8	41010.3	44655.1	42765.9	44229.5	37963.1	40236.7	41685.8	42218.4	37186.5	36906.3	37168.6	36433.6	41660.3	41759.7	39146.5	40551.7
Land	DEU	376753	305260	310376	347256	355614	333391	323501	333638	339147	315345	316268	335994	324227	306585	304370	297118	298772	320276	331991	328712	306759
Land	DNK	30148.2	28524.6	25716.9	22433.3	29896.9	26286	27709.6	28166.6	29802	28896.8	22627	27705.5	27935.8	22410.9	20367.8	21168.7	20890	20675.5	22502	23306.1	23037
Land	EST	10843.9	9820	8509.06	8928.87	8014.87	7158.29	8309.6	7771.16	7129.02	6878.94	5111.83	3582.76	3567.12	4779.42	3442	5046.69	4554.51	5666.37	6648.55	3693.88	6583.86
Land	ESP	227190	233379	253530	232008	239054	252044	239953	231965	248533	226750	217512	222285	205792	185754	183059	172777	161163	165271	172345	147862	161663
Land	FIN	22994.2	21199.9	17361.5	25654	25596.5	27137.5	26373.4	25712.2	25479.5	26058.2	21774	22989.5	24785.3	23941.2	21142.3	22091.9	21832.4	23481.7	23629	22732.7	20804.4
Land	FRA	291445	287102	292110	293474	281023	280561	281156	278097	258851	257147	248923	245286	244720	237953	226911	224725	245602	239979	240963	233155	233885
Land	GRC	67004	67251	67193.9	71400.5	71097	69541.4	66992.9	71491.8	72857.3	61727.3	56011.3	57851.4	53038.1	50053.6	47147.3	47027.9	41721.6	43526.6	47499.5	41387.3	43564.9
Land	HRV	14063.8	14672.7	15480.3	16209.3	16615	16275.8	15667	14844.8	16876.8	14434.6	14665.8	14382.6	13673.9	15541.5	15237.4	13934.4	13742.6	13963.5	14186.3	12522.8	12858.4
Land	HUN	49458.6	43641.6	44812	42495.7	51287.2	51451.5	38113.3	37942.8	39627.2	33440.5	24133.2	34256.3	30208.8	30120.4	30519.8	26246.6	29441.6	26008.7	27905.2	25999.5	25852.8
Land	IRL	41167.7	47500.8	42505.8	46252.3	40196.7	42322.7	40138.7	50391.4	46804.9	44085	33992.7	31214.1	23952.5	30255.9	38827.6	29034.2	47994.2	41170.2	42279.5	55870.4	28196.5
Land	ITA	239126	234701	246090	250744	251521	245926	248829	238894	242351	223821	231357	232254	202976	193902	183793	187975	176627	186132	188953	167527	161209
Land	LTU	37115.1	30504.4	29908.1	26158.3	27190.8	26071.3	26374	25560.7	22555.5	19275.7	17532.9	17388.3	14279.8	13465	11993.4	12273.5	19494.7	16715.9	16352.9	17002.3	17328.2
Land	LUX	5534.03	5007.48	3963.14	4235.44	4371.8	4980.3	4783.34	4478.78	5055.54	5060.56	4939.68	6276.97	6515.64	8621.87	7634.1	6253.31	7035.2	5257.57	5598.18	9076.13	7053.26
Land	LVA	18380.4	18228.5	18342	18223.9	18740.9	18573.2	20485.8	20416.9	15066.2	13419.8	12152.8	14644.5	19213.4	12263.8	12638.7	10584.7	11084.5	11030.9	12416.5	11092.8	10826.3
Land	MLT	76.9589	51.5537	41.3489	59.0374	73.6216	77.1229	62.5787	55.6684	57.9402	48.0317	44.9953	44.4771	45.8203	42.4279	35.6183	138.759	261.048	322.006	566.843	610.675	670.665
Land	NLD	137362	113996	112969	121372	116615	104938	99532.1	102539	104655	99169.7	64386.2	69591.5	72507	68871.6	77775.5	103281	85308.1	91248.2	90316	87774.9	80536.6
Land	POL	178877	181903	162357	159269	153917	155716	153486	153026	161045	142759	148068	150276	140551	127594	125521	122250	127849	126396	131530	123277	116193
Land	PRT	45145.8	44278.9	43504.5	46853.4	42526.6	41003.3	39979.1	41365.7	44533.5	42092.5	42195.9	40610.2	35562.5	34911.8	35878.6	36149.7	31477.7	31937.3	33733.4	30965.7	30107.7
Land	ROM	95448.6	96320.7	97212.5	102959	98281.8	92556.8	92436.4	87908.1	83105	76554.5	79502.6	78976.7	62317.6	54586.8	55566.1	43497.1	51733.1	54309.9	51400.2	49659.7	52346.3
Land	SWE	36810.8	33974.8	36757.4	36862.3	39097	37303.6	36134.5	38788.8	37216.1	39384.9	42619.1	44723.3	44342.2	45185.8	41870.9	38786.8	36981.8	39789.6	39063.6	37663.1	37554
Land	SVN	8827.36	7976.33	8268.16	8676.36	8950.52	8385.19	7925.38	8330.2	9013.74	8333.88	8135.15	8188.24	9145.48	8267.13	6630.37	6614.52	5602.3	5783.98	5959.51	5826.54	6122.91
Land	SVK	21697.6	18051.3	20284.9	19553.8	19887	17596.7	15839	17371.5	20716.5	18141.6	14649.7	15412.1	13433.4	14313.1	16175.8	15074.4	15880.8	14840.7	17002.2	18827.8	16312.1
Land	GBR	328918	305789	344986	338868	332751	358256	348125	316543	300124	299754	276029	283640	285433	275056	281812	313402	244772	262503	278091	247039	246098
Land	USA	1.74722e+06	1.75188e+06	1.84894e+06	1.74705e+06	1.74142e+06	1.78086e+06	1.76529e+06	1.53441e+06	1.48371e+06	1.40286e+06	1.40018e+06	1.41822e+06	1.36191e+06	1.35154e+06	1.36541e+06	1.37437e+06	1.39293e+06	1.38727e+06	1.32226e+06	1.33534e+06	1.36641e+06
Land	JPN	481509	465461	387553	433259	442279	466180	449844	436274	479011	378494	424909	429228	418323	368580	349474	318422	274966	302284	281938	297919	262963
Land	CHN	1.93837e+06	1.96939e+06	1.88891e+06	1.94279e+06	2.03808e+06	2.01268e+06	1.92784e+06	2.03016e+06	2.06863e+06	2.15711e+06	2.20064e+06	2.3216e+06	2.37056e+06	2.49067e+06	2.61737e+06	2.75098e+06	2.78865e+06	2.78384e+06	2.95803e+06	3.19176e+06	3.28646e+06
Land	CAN	204287	173975	194420	219824	211390	231275	194147	203168	169855	189638	193437	191006	191995	185189	179120	187977	179204	190867	178769	188878	184725
Land	KOR	126312	125737	139465	139413	150185	160191	167009	166343	167897	134094	172858	186703	181527	184353	174420	169664	164314	174832	168416	157610	144136
Land	BRA	1.04722e+06	971411	992703	976752	867724	895406	876060	856707	866804	868424	864928	866941	835096	830019	821628	797865	859938	839342	782413	752713	680289
Land	IND	1.26685e+06	1.26992e+06	1.25168e+06	1.27987e+06	1.25943e+06	1.25675e+06	1.2761e+06	1.26179e+06	1.13559e+06	1.20174e+06	1.16137e+06	1.12202e+06	1.07743e+06	1.00621e+06	1.09479e+06	1.14615e+06	1.21918e+06	1.20879e+06	1.17334e+06	1.18884e+06	1.168e+06
Land	MEX	453844	471016	454020	445920	440226	453127	444029	446549	446527	420476	387427	395323	388630	387789	376129	400791	359154	375894	368219	350690	312256
Land	RUS	1.0257e+06	1.13554e+06	1.00718e+06	871602	1.14509e+06	987701	1.06311e+06	959905	993459	887056	944542	925355	870019	958110	838483	785084	641448	873445	862173	898647	873145
Land	AUS	330495	368188	366851	373177	322743	327409	333212	295520	238218	291252	183531	228311	241045	230110	224074	208770	161052	217390	162008	120312	167657
Land	CHE	34788.5	32388.2	31295.2	38132.1	32623.8	31618.1	28636	30115.3	33348.1	34854.6	31862.5	37790.8	33201.6	35440.4	32983.7	35155.2	34943.9	36747.4	33709.9	36053.6	38674.5
Land	TUR	247383	228151	244808	250172	218116	225017	230243	241833	257258	207332	257928	266781	257094	255403	252641	251187	221890	238408	230709	200820	201035
Land	TWN	33020.4	22731.5	25294.4	26101.1	27793.8	31178.3	27765.9	24222.2	25410.5	22280.1	26373.5	22401.8	18604.2	22726.9	22611.1	21063.8	16743.4	18030.8	18863.9	16889.3	15434.4
Land	NOR	15765.2	16539.2	17578.8	18204	17104.2	17511.8	18916.8	19796.6	21338.9	18703.9	20676.7	22695.4	21801.3	21362.5	18435.6	19106.3	17913.8	19757.7	18498.9	19659	16891.7
Land	IDN	166219	172058	174981	193581	203326	196294	213183	212831	226771	207079	261420	274573	244448	243369	269253	255306	243300	245274	272426	242439	229530
Land	ZAF	89760.7	81339.5	80382.1	89323.9	90961.8	90506.7	96418	99719.7	92165.6	96681.9	92989.3	91578.6	87663.6	85896.4	80836.2	83447.3	70424.4	82452.5	77560.7	75728.3	71074.9
Land	WWA	1.75471e+06	1.61902e+06	1.74623e+06	1.66848e+06	1.66353e+06	1.65183e+06	1.59211e+06	1.62617e+06	1.71027e+06	1.90714e+06	1.9026e+06	1.65788e+06	1.85873e+06	1.89899e+06	1.77521e+06	1.77989e+06	2.16316e+06	1.7985e+06	1.99228e+06	1.86399e+06	1.98391e+06
Land	WWL	1.05547e+06	1.17251e+06	1.09667e+06	1.08967e+06	1.04761e+06	1.07304e+06	1.1991e+06	1.31575e+06	1.35111e+06	1.31261e+06	1.29534e+06	1.24738e+06	1.30757e+06	1.31912e+06	1.32993e+06	1.20555e+06	1.1061e+06	1.08974e+06	913648	897368	986479
Land	WWE	427505	447900	361678	447536	359553	320960	352725	354083	273559	251918	245826	213674	196105	224800	201243	201393	223088	220234	213394	233645	222491
Land	WWF	1.90641e+06	1.97629e+06	2.04111e+06	2.05324e+06	2.05174e+06	2.06636e+06	2.02619e+06	2.12089e+06	2.06102e+06	2.06194e+06	2.1186e+06	2.20293e+06	2.052e+06	2.11799e+06	2.12399e+06	2.12948e+06	2.05578e+06	1.98686e+06	1.9549e+06	1.96531e+06	1.95458e+06
Land	WWM	462203	473964	499284	502091	485962	576865	595343	661190	784875	960551	933594	949944	1.06333e+06	956111	1.03726e+06	1.03552e+06	942396	983727	1.00122e+06	1.02733e+06	966145
Land	Advanced	5.44324e+06	5.28309e+06	5.39515e+06	5.42305e+06	5.36161e+06	5.43682e+06	5.32503e+06	5.01532e+06	4.9305e+06	4.64875e+06	4.51235e+06	4.63827e+06	4.47681e+06	4.31014e+06	4.25445e+06	4.22548e+06	4.08624e+06	4.25176e+06	4.13891e+06	4.01619e+06	3.98326e+06
Land	EmergingDeveloping	1.18416e+07	1.19885e+07	1.18396e+07	1.1811e+07	1.18714e+07	1.18065e+07	1.18925e+07	1.21876e+07	1.2268e+07	1.25401e+07	1.26672e+07	1.2536e+07	1.26087e+07	1.27745e+07	1.28188e+07	1.28226e+07	1.28945e+07	1.27265e+07	1.28003e+07	1.28893e+07	1.29354e+07
Land	Global	1.72849e+07	1.72716e+07	1.72348e+07	1.72341e+07	1.7233e+07	1.72434e+07	1.72175e+07	1.72029e+07	1.71985e+07	1.71888e+07	1.71796e+07	1.71743e+07	1.70855e+07	1.70846e+07	1.70732e+07	1.70481e+07	1.69807e+07	1.69783e+07	1.69392e+07	1.69055e+07	1.69186e+07
Nitrogen	AUT	1.79231e+08	1.92188e+08	2.06865e+08	1.88172e+08	1.80499e+08	1.69721e+08	1.78728e+08	1.86906e+08	1.98051e+08	1.76272e+08	1.80586e+08	2.00239e+08	1.93841e+08	2.09159e+08	2.34918e+08	2.20628e+08	2.09544e+08	3.28017e+08	2.07285e+08	3.18286e+08	2.67949e+08
Nitrogen	BEL	3.20753e+08	3.14436e+08	3.12983e+08	3.4439e+08	3.60073e+08	3.26946e+08	3.45424e+08	3.47843e+08	3.84806e+08	3.66407e+08	3.27956e+08	2.71487e+08	2.81837e+08	2.94941e+08	3.23654e+08	2.73099e+08	2.85158e+08	3.20689e+08	3.06047e+08	2.81886e+08	2.83483e+08
Nitrogen	BGR	1.4367e+08	1.74416e+08	2.7547e+08	3.10519e+08	2.33332e+08	1.84484e+08	1.41752e+08	1.86311e+08	1.73828e+08	2.285e+08	1.33176e+08	1.56939e+08	1.49533e+08	1.40394e+08	1.24903e+08	1.31378e+08	1.25173e+08	1.31843e+08	1.13058e+08	1.2551e+08	1.3555e+08
Nitrogen	CYP	7.31625e+06	6.74225e+06	7.10728e+06	8.05497e+06	8.26343e+06	6.60654e+06	6.59392e+06	6.66651e+06	8.10588e+06	7.89995e+06	9.14838e+06	7.80338e+06	9.07969e+06	6.74722e+06	6.24843e+06	8.17848e+06	8.70912e+06	1.27434e+07	1.25611e+07	1.93033e+07	2.02026e+07
Nitrogen	CZE	2.47301e+08	2.76387e+08	1.86328e+08	2.13496e+08	2.01798e+08	1.92956e+08	2.13048e+08	2.18028e+08	2.18243e+08	2.05623e+08	2.03943e+08	2.05708e+08	2.4821e+08	2.27667e+08	2.9256e+08	2.53527e+08	2.33498e+08	2.56129e+08	2.35141e+08	2.3144e+08	2.21839e+08
Nitrogen	DEU	2.24967e+09	2.19481e+09	2.07382e+09	2.35228e+09	2.40133e+09	2.26653e+09	2.18252e+09	2.41496e+09	2.22787e+09	2.09046e+09	2.20397e+09	2.25592e+09	2.17109e+09	2.19298e+09	2.34506e+09	2.15157e+09	2.01605e+09	2.18538e+09	2.00303e+09	2.22395e+09	2.01564e+09
Nitrogen	DNK	2.46091e+08	2.21848e+08	1.75046e+08	1.57036e+08	1.94903e+08	1.64521e+08	1.61471e+08	1.84389e+08	1.73932e+08	1.57242e+08	1.3455e+08	1.74272e+08	1.83325e+08	1.57511e+08	1.89115e+08	1.84081e+08	1.68462e+08	2.10209e+08	1.72898e+08	1.90364e+08	2.12014e+08
Nitrogen	EST	2.32249e+07	2.14204e+07	2.02463e+07	2.63427e+07	2.71707e+07	2.18276e+07	2.60078e+07	2.16865e+07	3.11362e+07	2.06444e+07	1.71419e+07	1.73129e+07	1.84295e+07	2.26914e+07	2.21938e+07	2.69198e+07	2.12561e+07	2.74022e+07	3.02959e+07	2.29037e+07	4.41526e+07
Nitrogen	ESP	1.19537e+09	1.26775e+09	1.25882e+09	1.36486e+09	1.32287e+09	1.21609e+09	1.2224e+09	1.27605e+09	1.08686e+09	1.02978e+09	1.15073e+09	1.09348e+09	1.02201e+09	1.02841e+09	1.17776e+09	1.13591e+09	1.01987e+09	1.11505e+09	1.11706e+09	1.01071e+09	1.10734e+09
Nitrogen	FIN	1.67683e+08	1.5521e+08	1.45462e+08	1.7669e+08	1.74651e+08	1.68698e+08	1.71789e+08	1.72584e+08	1.75613e+08	1.71014e+08	1.60699e+08	1.59289e+08	1.62144e+08	1.68037e+08	1.63151e+08	1.61139e+08	1.52911e+08	1.61106e+08	1.56842e+08	1.61578e+08	1.75755e+08
Nitrogen	FRA	1.97277e+09	2.08395e+09	1.93437e+09	2.0214e+09	2.00937e+09	1.94238e+09	1.98916e+09	2.09301e+09	1.68995e+09	1.56465e+09	1.58278e+09	1.55469e+09	2.09046e+09	1.66702e+09	1.65979e+09	1.66853e+09	1.73205e+09	1.80296e+09	1.58942e+09	1.53551e+09	1.5551e+09
Nitrogen	GRC	3.39549e+08	3.15707e+08	3.02216e+08	3.29195e+08	3.46179e+08	3.04237e+08	2.87933e+08	3.3042e+08	3.11622e+08	2.71633e+08	2.86621e+08	2.69389e+08	2.41135e+08	2.57967e+08	2.2165e+08	2.04929e+08	1.92435e+08	2.13926e+08	2.26084e+08	2.17861e+08	2.35142e+08
Nitrogen	HRV	1.43403e+07	1.30999e+07	1.50564e+07	1.95075e+07	1.81878e+07	1.77516e+07	1.74876e+08	1.81146e+08	2.33972e+08	8.82004e+07	1.0636e+08	1.22063e+08	9.27184e+07	7.38767e+07	6.97734e+07	7.6043e+07	6.13227e+07	8.04601e+07	8.02131e+07	8.00144e+07	8.76909e+07
Nitrogen	HUN	2.89799e+08	2.63325e+08	2.56772e+08	2.2507e+08	2.65554e+08	2.37646e+08	2.06272e+08	2.37559e+08	2.3649e+08	1.80001e+08	1.48987e+08	2.00669e+08	1.81858e+08	2.19904e+08	2.10671e+08	1.86765e+08	2.23225e+08	2.22532e+08	2.2368e+08	2.15881e+08	2.37368e+08
Nitrogen	IRL	2.56915e+08	2.78876e+08	3.12092e+08	3.20707e+08	2.49285e+08	2.45405e+08	2.41209e+08	2.80719e+08	2.41511e+08	2.76086e+08	2.10422e+08	1.82178e+08	1.56314e+08	1.94528e+08	2.56503e+08	1.99389e+08	2.52107e+08	2.69875e+08	2.75766e+08	3.22344e+08	2.23128e+08
Nitrogen	ITA	1.24757e+09	1.23604e+09	1.34234e+09	1.41898e+09	1.45897e+09	1.3521e+09	1.45981e+09	1.44745e+09	1.26994e+09	1.09487e+09	1.10682e+09	1.12613e+09	1.08936e+09	1.0575e+09	1.07836e+09	1.10929e+09	1.05267e+09	1.16962e+09	1.14852e+09	1.04827e+09	1.03065e+09
Nitrogen	LTU	9.89306e+07	1.01086e+08	1.15772e+08	1.14336e+08	1.16938e+08	1.07419e+08	1.10307e+08	9.33377e+07	9.98042e+07	8.22495e+07	7.38374e+07	7.75746e+07	1.02853e+08	8.23813e+07	8.72959e+07	8.56215e+07	1.41367e+08	1.00976e+08	9.22017e+07	1.10468e+08	1.26431e+08
Nitrogen	LUX	2.77226e+07	2.9031e+07	2.3309e+07	2.96277e+07	3.25903e+07	3.21435e+07	3.20365e+07	3.00759e+07	3.27481e+07	2.98509e+07	3.01192e+07	3.29086e+07	3.24673e+07	4.29806e+07	4.59795e+07	4.06653e+07	3.99816e+07	4.01705e+07	3.44721e+07	4.57369e+07	5.20614e+07
Nitrogen	LVA	3.06607e+07	3.30642e+07	2.89462e+07	3.98864e+07	3.92584e+07	4.61807e+07	5.08495e+07	4.60709e+07	4.22482e+07	3.86773e+07	3.77831e+07	4.3465e+07	4.76216e+07	5.3041e+07	5.52179e+07	4.38513e+07	2.12956e+07	4.9478e+07	4.52929e+07	5.12256e+07	2.25068e+07
Nitrogen	MLT	2.12863e+06	959597	765190	757239	812757	873258	876658	779403	518444	514013	628718	553654	638598	614326	579079	1.19075e+06	2.19268e+06	2.9771e+06	4.70367e+06	1.02698e+07	6.53213e+06
Nitrogen	NLD	5.87764e+08	6.00704e+08	5.95585e+08	6.14034e+08	6.21233e+08	5.46739e+08	5.45929e+08	5.90196e+08	5.39431e+08	5.25888e+08	3.80212e+08	3.90717e+08	4.19962e+08	3.98449e+08	4.49738e+08	6.0886e+08	4.25258e+08	5.04324e+08	4.61769e+08	4.67016e+08	4.82869e+08
Nitrogen	POL	8.77552e+08	8.79641e+08	8.07319e+08	8.54702e+08	8.31161e+08	9.3898e+08	9.72179e+08	1.08156e+09	1.05781e+09	9.26575e+08	1.04085e+09	1.0262e+09	2.86232e+08	9.44873e+08	2.74118e+08	8.9342e+08	3.13798e+08	5.3499e+08	7.96691e+08	5.2192e+08	5.65651e+08
Nitrogen	PRT	1.8051e+08	1.77273e+08	1.90416e+08	1.99085e+08	1.75144e+08	1.62849e+08	1.62858e+08	1.98005e+08	1.91366e+08	1.79512e+08	1.91568e+08	1.76209e+08	1.62116e+08	1.67773e+08	1.95459e+08	1.83448e+08	1.57022e+08	1.68167e+08	1.67248e+08	1.68374e+08	1.68791e+08
Nitrogen	ROM	2.5251e+08	2.76728e+08	2.49681e+08	2.75319e+08	3.00895e+08	3.19192e+08	2.79719e+08	3.12176e+08	3.08879e+08	3.1282e+08	3.02574e+08	3.25172e+08	2.4772e+08	8.22429e+07	2.85205e+08	2.78573e+08	2.65783e+08	3.16511e+08	3.34439e+08	3.37938e+08	3.80998e+08
Nitrogen	SWE	2.41622e+08	2.3496e+08	2.34354e+08	2.43104e+08	2.41504e+08	2.23355e+08	2.28125e+08	2.50824e+08	2.57636e+08	2.27414e+08	2.64368e+08	2.68858e+08	2.51222e+08	2.72639e+08	2.79701e+08	2.82006e+08	2.62496e+08	2.91111e+08	2.65282e+08	2.65052e+08	2.86181e+08
Nitrogen	SVN	4.94749e+07	4.63695e+07	4.50139e+07	4.83834e+07	4.5476e+07	4.10107e+07	4.19458e+07	4.40682e+07	4.21456e+07	4.07396e+07	4.08953e+07	4.131e+07	3.70182e+07	3.9346e+07	3.9488e+07	3.81613e+07	2.95327e+07	3.50024e+07	3.24361e+07	3.78311e+07	4.1616e+07
Nitrogen	SVK	9.03317e+07	7.80143e+07	8.62404e+07	8.19407e+07	8.39646e+07	7.7421e+07	7.94933e+07	8.4157e+07	9.18116e+07	9.12148e+07	8.30081e+07	8.3329e+07	7.48847e+07	9.62486e+07	1.18306e+08	9.71795e+07	9.47277e+07	6.44698e+07	1.75119e+08	1.86624e+08	2.01611e+08
Nitrogen	GBR	1.84961e+09	1.98981e+09	2.00076e+09	1.98532e+09	2.05754e+09	2.06322e+09	2.02761e+09	1.96835e+09	1.84309e+09	1.72973e+09	1.65594e+09	1.67295e+09	1.73685e+09	1.69852e+09	1.94204e+09	2.07448e+09	1.65458e+09	1.81953e+09	1.78934e+09	1.76083e+09	1.65457e+09
Nitrogen	USA	1.05173e+10	1.08908e+10	1.16456e+10	1.20167e+10	1.12647e+10	1.11425e+10	1.20013e+10	1.10466e+10	9.79257e+09	1.01311e+10	1.05255e+10	1.10922e+10	1.12433e+10	1.12356e+10	1.16924e+10	1.1631e+10	1.07057e+10	1.08569e+10	1.06024e+10	1.09882e+10	1.11792e+10
Nitrogen	JPN	2.21027e+09	2.33541e+09	2.12648e+09	2.29177e+09	2.25864e+09	2.33265e+09	2.33228e+09	2.41742e+09	2.35616e+09	2.08119e+09	2.20103e+09	2.43329e+09	2.63311e+09	2.5813e+09	5.55749e+09	4.30817e+09	1.61196e+09	1.83272e+09	1.73426e+09	1.84441e+09	2.1753e+09
Nitrogen	CHN	1.95627e+10	1.99772e+10	2.19356e+10	2.22221e+10	2.41739e+10	2.44911e+10	2.49298e+10	2.50645e+10	2.62925e+10	2.73222e+10	2.80142e+10	2.93591e+10	2.92524e+10	2.88831e+10	2.32714e+10	2.40527e+10	3.11106e+10	3.10669e+10	3.03729e+10	2.92372e+10	2.85035e+10
Nitrogen	CAN	1.00304e+09	1.00752e+09	1.10459e+09	1.24901e+09	1.1304e+09	1.2892e+09	1.06478e+09	1.446e+09	1.26638e+09	1.3496e+09	1.47372e+09	1.64011e+09	1.77912e+09	1.65916e+09	1.63759e+09	1.62339e+09	1.44608e+09	1.48816e+09	1.54066e+09	1.51588e+09	1.65518e+09
Nitrogen	KOR	8.60513e+08	9.15215e+08	1.15006e+09	1.08398e+09	1.06768e+09	1.14392e+09	1.10376e+09	1.38769e+09	1.11642e+09	8.7125e+08	9.95387e+08	1.17126e+09	1.31472e+09	1.46483e+09	2.3728e+09	2.01038e+09	9.42078e+08	1.061e+09	1.07171e+09	1.05068e+09	1.206e+09
Nitrogen	BRA	1.68014e+09	1.59546e+09	1.88272e+09	2.22957e+09	2.23456e+09	1.95503e+09	2.11497e+09	2.67488e+09	2.4929e+09	2.1564e+09	2.77699e+09	3.30551e+09	2.83076e+09	3.34066e+09	3.85865e+09	2.78384e+09	2.9906e+09	3.5709e+09	3.47352e+09	3.62748e+09	3.95907e+09
Nitrogen	IND	1.05591e+10	1.10269e+10	1.01363e+10	1.08022e+10	1.12881e+10	1.22381e+10	1.32303e+10	1.37961e+10	1.38218e+10	1.47302e+10	1.54574e+10	1.60565e+10	1.53823e+10	1.51397e+10	1.59418e+10	1.66277e+10	1.60299e+10	1.65264e+10	1.67936e+10	1.79515e+10	1.93829e+10
Nitrogen	MEX	1.66273e+09	1.82162e+09	1.53992e+09	1.52034e+09	1.32242e+09	1.61398e+09	1.50402e+09	1.61476e+09	1.39919e+09	1.42509e+09	1.36539e+09	1.67718e+09	1.74279e+09	1.78507e+09	1.78754e+09	1.58829e+09	1.70957e+09	1.73286e+09	1.59237e+09	1.46933e+09	1.53598e+09
Nitrogen	RUS	1.07911e+09	1.12612e+09	7.86624e+08	8.21655e+08	1.18903e+09	1.04618e+09	1.27701e+09	1.35231e+09	1.53032e+09	1.40607e+09	1.62845e+09	1.69211e+09	1.68996e+09	1.96171e+09	1.74421e+09	1.46328e+09	1.44704e+09	1.63463e+09	1.50935e+09	1.71292e+09	1.76491e+09
Nitrogen	AUS	6.02388e+08	7.17333e+08	6.82483e+08	8.0543e+08	7.47815e+08	6.91893e+08	7.07801e+08	7.35635e+08	5.86554e+08	6.57726e+08	6.55899e+08	7.518e+08	7.33157e+08	7.84827e+08	8.74939e+08	9.07728e+08	6.85951e+08	7.8027e+08	6.4704e+08	6.46854e+08	8.62576e+08
Nitrogen	CHE	1.40225e+08	1.48999e+08	1.41934e+08	1.51602e+08	1.42002e+08	1.42142e+08	1.39143e+08	1.42597e+08	1.59123e+08	1.65953e+08	1.68255e+08	1.9827e+08	1.92225e+08	1.98706e+08	1.9894e+08	2.10717e+08	1.7821e+08	2.10332e+08	1.69097e+08	1.91204e+08	2.15269e+08
Nitrogen	TUR	1.26408e+09	1.03251e+09	1.16861e+09	1.25423e+09	1.20639e+09	1.26494e+09	1.3183e+09	1.31411e+09	1.17644e+09	1.28568e+09	1.50587e+09	1.37394e+09	1.46098e+09	1.52053e+09	1.48347e+09	1.42512e+09	1.66487e+09	1.62247e+09	1.35181e+09	1.4996e+09	1.86013e+09
Nitrogen	TWN	1.43661e+09	6.31339e+08	4.15085e+08	2.77066e+08	2.16528e+08	2.04372e+08	1.88264e+08	1.75924e+08	1.66448e+08	1.57979e+08	2.04873e+08	1.73052e+08	1.55676e+08	1.92213e+08	1.88271e+08	1.82666e+08	1.38051e+08	1.49551e+08	1.39487e+08	1.50082e+08	1.41778e+08
Nitrogen	NOR	1.32064e+08	1.43046e+08	1.54656e+08	1.59862e+08	1.33754e+08	1.37633e+08	1.52787e+08	1.60109e+08	1.69407e+08	1.47777e+08	1.47792e+08	1.68464e+08	1.59453e+08	1.74459e+08	1.65133e+08	1.79148e+08	1.44472e+08	1.66215e+08	1.46422e+08	1.75114e+08	1.661e+08
Nitrogen	IDN	1.47885e+09	1.44166e+09	1.53645e+09	1.65819e+09	1.82066e+09	1.83959e+09	2.00365e+09	2.04271e+09	2.18642e+09	2.22346e+09	2.40404e+09	2.59922e+09	2.57609e+09	2.44859e+09	2.62348e+09	2.54343e+09	2.58827e+09	2.5287e+09	2.94343e+09	2.63941e+09	3.13189e+09
Nitrogen	ZAF	4.05309e+08	3.30708e+08	3.97496e+08	4.11168e+08	4.14903e+08	3.37592e+08	4.17164e+08	4.75747e+08	3.95722e+08	3.87662e+08	3.74544e+08	3.73369e+08	4.17011e+08	3.9571e+08	3.62172e+08	3.48074e+08	2.95898e+08	4.26384e+08	4.20621e+08	4.60531e+08	4.86949e+08
Nitrogen	WWA	6.49107e+09	6.07633e+09	6.80979e+09	6.89602e+09	7.12297e+09	7.18326e+09	6.32968e+09	6.71056e+09	6.74933e+09	8.92975e+09	8.83819e+09	8.02034e+09	8.68314e+09	9.45743e+09	9.58088e+09	1.04438e+10	1.09437e+10	9.50542e+09	1.05156e+10	9.1574e+09	1.11017e+10
Nitrogen	WWL	1.81514e+09	1.9421e+09	1.79927e+09	1.86745e+09	1.94824e+09	1.80963e+09	2.16581e+09	2.51487e+09	2.55352e+09	2.31107e+09	2.63225e+09	2.68853e+09	2.79367e+09	2.88766e+09	3.22657e+09	2.9292e+09	2.69873e+09	2.9305e+09	2.70711e+09	2.68371e+09	3.18803e+09
Nitrogen	WWE	6.50131e+08	7.30949e+08	6.05531e+08	8.09593e+08	7.01536e+08	6.87647e+08	1.04897e+09	1.17602e+09	1.09035e+09	1.00136e+09	9.49562e+08	9.92044e+08	9.85522e+08	1.20633e+09	9.3186e+08	9.82806e+08	1.07524e+09	1.07088e+09	1.06059e+09	1.12579e+09	1.23834e+09
Nitrogen	WWF	1.32366e+09	1.35465e+09	1.86739e+09	1.70599e+09	1.85142e+09	1.86814e+09	1.98534e+09	2.0918e+09	2.10911e+09	2.10585e+09	2.69759e+09	2.72233e+09	2.76028e+09	2.95216e+09	3.13368e+09	3.01909e+09	3.15007e+09	3.50633e+09	3.21125e+09	3.33372e+09	3.78721e+09
Nitrogen	WWM	2.76744e+09	3.03543e+09	2.89479e+09	2.58563e+09	2.69725e+09	2.82937e+09	3.36925e+09	3.55051e+09	3.94963e+09	4.02194e+09	4.02533e+09	4.19886e+09	4.61102e+09	4.75917e+09	5.15783e+09	4.69968e+09	4.83004e+09	4.67737e+09	4.54233e+09	4.86638e+09	5.15082e+09
Nitrogen	Advanced	3.00925e+10	3.02535e+10	3.0624e+10	3.19986e+10	3.09605e+10	3.04616e+10	3.1231e+10	3.17973e+10	2.87825e+10	2.76771e+10	2.84381e+10	2.97653e+10	2.99017e+10	3.00896e+10	3.4837e+10	3.3672e+10	2.7015e+10	2.89807e+10	2.8148e+10	2.85315e+10	2.94442e+10
Nitrogen	EmergingDeveloping	5.07394e+10	5.14917e+10	5.33605e+10	5.47841e+10	5.79715e+10	5.91646e+10	6.16942e+10	6.43789e+10	6.57472e+10	6.93068e+10	7.26698e+10	7.5059e+10	7.51859e+10	7.67378e+10	7.31036e+10	7.2907e+10	8.05346e+10	8.07997e+10	8.04946e+10	7.9765e+10	8.50913e+10
Nitrogen	Global	8.0832e+10	8.17452e+10	8.39845e+10	8.67827e+10	8.89319e+10	8.96262e+10	9.29253e+10	9.61761e+10	9.45297e+10	9.69838e+10	1.01108e+11	1.04824e+11	1.05088e+11	1.06827e+11	1.07941e+11	1.06579e+11	1.0755e+11	1.0978e+11	1.08643e+11	1.08297e+11	1.14535e+11
Phosphorus	AUT	3.24683e+07	3.32063e+07	3.26431e+07	3.27652e+07	2.93448e+07	2.65804e+07	2.67172e+07	2.7541e+07	2.64192e+07	1.94563e+07	2.28592e+07	2.4765e+07	2.4865e+07	2.62552e+07	2.71786e+07	2.71528e+07	2.59087e+07	2.8348e+07	2.56374e+07	2.47848e+07	2.66722e+07
Phosphorus	BEL	4.05881e+07	4.08355e+07	3.92903e+07	4.26207e+07	4.66936e+07	3.99263e+07	4.43275e+07	4.08882e+07	3.23418e+07	3.25613e+07	3.31081e+07	2.71803e+07	3.12306e+07	3.13374e+07	3.08388e+07	2.70844e+07	2.62174e+07	3.09907e+07	2.88735e+07	2.84712e+07	3.06437e+07
Phosphorus	BGR	3.70565e+06	1.31675e+07	4.01667e+07	7.44377e+07	1.32116e+07	1.90154e+07	3.24953e+07	4.58339e+07	4.82858e+07	2.12093e+07	1.26653e+07	1.97031e+07	2.04553e+07	2.22469e+07	2.14729e+07	2.45501e+07	2.70171e+07	2.33816e+07	2.61553e+07	2.92137e+07	3.20501e+07
Phosphorus	CYP	1.77381e+06	1.97154e+06	2.26696e+06	2.61037e+06	2.28214e+06	2.06305e+06	2.07986e+06	2.04751e+06	1.29988e+06	2.34031e+06	2.41852e+06	1.3002e+06	2.17033e+06	1.82026e+06	1.56107e+06	1.8893e+06	2.05417e+06	3.00623e+06	2.70533e+06	3.86398e+06	4.55336e+06
Phosphorus	CZE	2.2195e+07	2.62934e+07	1.99012e+07	2.28602e+07	2.19613e+07	2.17828e+07	2.57813e+07	2.59464e+07	2.02009e+07	1.91413e+07	2.06931e+07	2.29656e+07	2.25354e+07	2.18877e+07	2.1449e+07	2.32515e+07	2.00299e+07	2.66181e+07	2.35641e+07	2.5609e+07	2.55428e+07
Phosphorus	DEU	2.7371e+08	2.3142e+08	2.35099e+08	2.41861e+08	2.67056e+08	2.37572e+08	2.36313e+08	2.53408e+08	1.80518e+08	1.93009e+08	2.25628e+08	2.12192e+08	2.31552e+08	2.25021e+08	2.34957e+08	2.26417e+08	2.05976e+08	2.17084e+08	1.9223e+08	2.14461e+08	1.98241e+08
Phosphorus	DNK	2.13587e+07	2.14936e+07	1.7434e+07	1.69409e+07	2.50172e+07	2.14098e+07	1.84338e+07	2.22203e+07	1.65283e+07	1.38836e+07	1.57791e+07	1.88806e+07	1.85027e+07	1.89462e+07	1.69487e+07	1.96062e+07	1.67577e+07	2.03475e+07	1.71772e+07	1.87473e+07	1.96163e+07
Phosphorus	EST	2.71976e+06	2.07354e+06	2.31868e+06	3.30042e+06	3.80196e+06	3.35447e+06	4.30068e+06	2.96517e+06	4.17437e+06	2.15455e+06	2.13555e+06	2.72805e+06	2.85858e+06	3.71052e+06	3.32598e+06	3.51562e+06	2.70678e+06	4.53599e+06	3.87506e+06	3.77674e+06	5.6427e+06
Phosphorus	ESP	2.53193e+08	2.66198e+08	2.69177e+08	2.74164e+08	2.76378e+08	2.39425e+08	2.20347e+08	2.64098e+08	1.5112e+08	1.34297e+08	1.66295e+08	1.71415e+08	1.73992e+08	1.83023e+08	1.73462e+08	1.71347e+08	1.69967e+08	1.70414e+08	1.6881e+08	1.77914e+08	1.87763e+08
Phosphorus	FIN	2.48115e+07	1.99254e+07	2.18494e+07	2.51753e+07	2.44704e+07	2.23315e+07	2.30023e+07	2.26645e+07	1.61323e+07	1.88959e+07	1.59485e+07	1.64533e+07	1.76057e+07	1.77418e+07	1.8229e+07	1.72048e+07	1.48402e+07	1.81495e+07	1.6576e+07	1.73204e+07	1.606e+07
Phosphorus	FRA	3.43065e+08	3.20703e+08	2.99469e+08	3.05426e+08	2.99211e+08	2.70736e+08	2.6561e+08	2.79776e+08	1.58629e+08	1.13971e+08	1.51341e+08	1.40523e+08	2.0353e+08	2.12663e+08	2.00421e+08	1.95232e+08	1.84299e+08	2.00195e+08	1.85341e+08	1.84434e+08	1.96687e+08
Phosphorus	GRC	5.90744e+07	6.003e+07	5.15848e+07	5.9812e+07	5.55697e+07	4.92825e+07	4.81357e+07	4.71336e+07	4.0677e+07	3.48488e+07	4.07026e+07	3.45266e+07	3.37226e+07	3.53561e+07	3.04267e+07	2.84282e+07	2.6609e+07	2.96802e+07	3.22746e+07	3.18428e+07	3.38993e+07
Phosphorus	HRV	2.75889e+06	2.84572e+06	2.92244e+06	3.51875e+06	3.70269e+06	3.36068e+06	3.4236e+07	3.02047e+07	3.73959e+07	1.88351e+07	3.90628e+07	3.62315e+07	1.40522e+07	1.43301e+07	1.68917e+07	1.31995e+07	6.56451e+06	1.54988e+07	1.51127e+07	1.59226e+07	1.76896e+07
Phosphorus	HUN	2.20136e+07	2.64763e+07	2.95966e+07	2.96548e+07	3.44035e+07	2.77386e+07	3.01586e+07	3.53022e+07	2.51521e+07	1.68368e+07	1.64616e+07	1.82109e+07	2.07223e+07	2.69956e+07	2.53824e+07	2.53042e+07	2.78077e+07	3.71323e+07	3.20087e+07	3.29836e+07	3.48576e+07
Phosphorus	IRL	3.34638e+07	3.97276e+07	4.33933e+07	4.04627e+07	3.34986e+07	3.18656e+07	2.99441e+07	3.41563e+07	2.34378e+07	2.8164e+07	2.42232e+07	1.99331e+07	1.78279e+07	2.4067e+07	2.33894e+07	2.11776e+07	2.53636e+07	3.03763e+07	2.66799e+07	3.62381e+07	2.1853e+07
Phosphorus	ITA	2.73451e+08	2.17449e+08	2.0715e+08	2.14555e+08	2.25878e+08	2.00318e+08	2.08047e+08	2.09405e+08	1.52513e+08	1.32971e+08	1.52769e+08	1.52825e+08	1.50312e+08	1.4152e+08	1.37234e+08	1.38353e+08	1.33358e+08	1.46458e+08	1.38054e+08	1.35269e+08	1.54124e+08
Phosphorus	LTU	8.96415e+06	8.69116e+06	1.31692e+07	1.36859e+07	1.43984e+07	1.36664e+07	1.61182e+07	1.09819e+07	9.6283e+06	8.67939e+06	7.46929e+06	8.18755e+06	1.22993e+07	1.21245e+07	1.45668e+07	1.58834e+07	1.62038e+07	1.60291e+07	1.5262e+07	1.6908e+07	1.88637e+07
Phosphorus	LUX	3.61677e+06	3.77143e+06	2.65783e+06	3.26555e+06	3.75204e+06	3.628e+06	3.62434e+06	3.03098e+06	2.64466e+06	2.37382e+06	3.04289e+06	3.13679e+06	3.26361e+06	4.53639e+06	4.49474e+06	3.87715e+06	3.221e+06	3.75365e+06	3.29933e+06	4.16934e+06	4.78686e+06
Phosphorus	LVA	4.85885e+06	5.98092e+06	3.85238e+06	4.57901e+06	8.18823e+06	7.58719e+06	7.84063e+06	6.31828e+06	5.31232e+06	4.08898e+06	4.99288e+06	5.38273e+06	7.83506e+06	9.78918e+06	9.03299e+06	9.15989e+06	7.80077e+06	9.99172e+06	9.06891e+06	9.95931e+06	1.11285e+07
Phosphorus	MLT	319581	162980	93832.3	123065	176445	117970	101525	102871	70614	29616.7	54754.1	77953.6	56853.4	58070.1	45104.3	148719	412754	723838	734555	2.29564e+06	1.57105e+06
Phosphorus	NLD	7.73423e+07	7.09438e+07	7.14416e+07	7.67744e+07	9.13292e+07	7.08449e+07	6.96154e+07	7.54917e+07	5.21229e+07	4.88184e+07	4.45353e+07	4.54475e+07	5.01422e+07	4.91746e+07	5.01177e+07	5.84594e+07	5.04159e+07	6.09678e+07	5.45053e+07	5.55711e+07	5.59264e+07
Phosphorus	POL	1.36644e+08	1.40798e+08	1.27782e+08	1.36497e+08	1.34155e+08	1.78506e+08	1.64784e+08	1.87032e+08	1.52523e+08	1.3965e+08	1.68419e+08	1.492e+08	1.5133e+08	1.33143e+08	1.17996e+08	1.24986e+08	1.35561e+08	1.3163e+08	1.24726e+08	1.32456e+08	1.16868e+08
Phosphorus	PRT	3.92507e+07	4.07305e+07	3.92122e+07	3.99048e+07	3.69181e+07	3.24976e+07	3.3924e+07	4.25155e+07	2.80934e+07	2.17383e+07	2.94835e+07	2.2351e+07	2.2534e+07	2.53022e+07	2.52926e+07	2.82936e+07	2.41716e+07	2.56174e+07	2.39879e+07	2.5256e+07	2.62984e+07
Phosphorus	ROM	2.72715e+07	3.83715e+07	3.36691e+07	4.38082e+07	4.44403e+07	6.28771e+07	4.69685e+07	5.28266e+07	4.9852e+07	4.8354e+07	5.71113e+07	6.05347e+07	5.04111e+07	4.31247e+07	5.20329e+07	5.94901e+07	5.42487e+07	6.34743e+07	7.96657e+07	8.74868e+07	8.50018e+07
Phosphorus	SWE	3.31339e+07	3.10813e+07	2.95224e+07	3.29674e+07	3.26197e+07	2.99127e+07	2.82074e+07	2.90148e+07	2.7028e+07	1.84707e+07	2.68878e+07	2.75422e+07	2.88216e+07	3.12626e+07	2.90062e+07	2.95931e+07	2.72232e+07	3.1993e+07	2.76265e+07	3.01438e+07	3.25141e+07
Phosphorus	SVN	1.03999e+07	9.79705e+06	8.46499e+06	9.06084e+06	8.82548e+06	7.5742e+06	7.64682e+06	7.72873e+06	7.14753e+06	5.15374e+06	6.28313e+06	5.99697e+06	5.1014e+06	6.37376e+06	5.92767e+06	6.07382e+06	4.13974e+06	5.45786e+06	4.60965e+06	5.24698e+06	6.03219e+06
Phosphorus	SVK	1.04648e+07	1.06575e+07	9.62462e+06	9.51575e+06	9.67904e+06	9.99585e+06	1.12436e+07	1.10619e+07	9.69983e+06	9.45321e+06	9.09113e+06	1.0534e+07	1.08239e+07	1.24833e+07	1.38407e+07	1.299e+07	1.16636e+07	1.33496e+07	1.53469e+07	1.83075e+07	1.67187e+07
Phosphorus	GBR	2.6485e+08	2.53644e+08	2.64492e+08	2.69359e+08	2.87727e+08	2.99033e+08	2.81737e+08	2.44647e+08	2.05184e+08	1.63362e+08	1.87898e+08	1.76395e+08	2.11878e+08	1.98262e+08	2.0304e+08	2.1923e+08	1.96617e+08	1.98996e+08	1.78452e+08	1.81677e+08	1.68237e+08
Phosphorus	USA	1.88348e+09	2.0161e+09	1.97016e+09	2.09598e+09	2.18883e+09	2.11515e+09	2.1505e+09	1.9202e+09	1.49596e+09	1.78375e+09	1.87749e+09	1.84356e+09	1.97806e+09	1.96369e+09	1.86986e+09	1.956e+09	1.90648e+09	1.91364e+09	1.8348e+09	1.87163e+09	1.96537e+09
Phosphorus	JPN	5.63232e+08	5.30655e+08	4.6385e+08	4.98871e+08	4.56781e+08	4.58656e+08	4.73473e+08	4.63309e+08	3.6847e+08	3.42403e+08	4.25934e+08	4.32042e+08	4.57853e+08	4.18422e+08	4.17276e+08	3.74844e+08	3.25205e+08	3.83597e+08	3.46012e+08	3.67178e+08	3.4502e+08
Phosphorus	CHN	3.1843e+09	3.5839e+09	4.08294e+09	3.81976e+09	4.39967e+09	4.65988e+09	4.76551e+09	4.10083e+09	4.31294e+09	5.1864e+09	5.71704e+09	5.72673e+09	5.71422e+09	5.81051e+09	5.76798e+09	5.64881e+09	5.5646e+09	5.5268e+09	5.50805e+09	5.38916e+09	5.74458e+09
Phosphorus	CAN	1.65277e+08	1.6065e+08	1.73997e+08	2.31963e+08	1.91234e+08	2.0929e+08	1.97432e+08	2.33503e+08	2.14657e+08	1.98985e+08	2.33734e+08	2.87003e+08	2.88217e+08	3.08782e+08	2.94559e+08	3.10878e+08	2.94067e+08	3.3032e+08	3.41991e+08	3.12641e+08	3.52834e+08
Phosphorus	KOR	1.6599e+08	1.54742e+08	1.86411e+08	1.82742e+08	1.56333e+08	1.65266e+08	1.68184e+08	1.98935e+08	1.35013e+08	1.3577e+08	1.71415e+08	1.92004e+08	2.02338e+08	2.01278e+08	1.88544e+08	1.80072e+08	1.6965e+08	1.97639e+08	1.98543e+08	2.01725e+08	1.67812e+08
Phosphorus	BRA	9.81068e+08	1.00174e+09	1.09839e+09	1.27121e+09	1.409e+09	1.08039e+09	1.1178e+09	1.44744e+09	1.27648e+09	9.25349e+08	1.12969e+09	1.39567e+09	1.26294e+09	1.52298e+09	1.55774e+09	1.23001e+09	1.27465e+09	1.40583e+09	1.36899e+09	1.26404e+09	1.57574e+09
Phosphorus	IND	1.61113e+09	1.56396e+09	1.40283e+09	1.59484e+09	1.71332e+09	1.90969e+09	2.04059e+09	1.86717e+09	2.25189e+09	2.61719e+09	2.98353e+09	2.91397e+09	2.35253e+09	2.05491e+09	2.12416e+09	2.43667e+09	2.35726e+09	2.54392e+09	2.52169e+09	2.78888e+09	3.13514e+09
Phosphorus	MEX	2.11082e+08	2.12856e+08	2.1372e+08	2.01286e+08	2.0623e+08	2.15699e+08	2.136e+08	1.83132e+08	1.26985e+08	1.6327e+08	1.66637e+08	1.61455e+08	1.70505e+08	1.8783e+08	2.12225e+08	2.34165e+08	2.27291e+08	2.12364e+08	2.28024e+08	2.45931e+08	1.70039e+08
Phosphorus	RUS	1.31956e+08	1.34802e+08	1.38238e+08	1.47545e+08	1.86386e+08	2.01366e+08	2.41376e+08	2.49383e+08	2.57468e+08	2.32344e+08	3.11478e+08	3.29143e+08	3.39847e+08	3.49017e+08	3.35663e+08	2.68044e+08	2.66031e+08	3.07348e+08	2.9839e+08	3.08598e+08	3.20902e+08
Phosphorus	AUS	1.42013e+08	1.91374e+08	2.44968e+08	2.94826e+08	3.19276e+08	3.22598e+08	3.12332e+08	3.1902e+08	2.49816e+08	2.19488e+08	2.5873e+08	2.77999e+08	2.87626e+08	2.62016e+08	2.77029e+08	3.01485e+08	2.72243e+08	3.28503e+08	2.6779e+08	2.6692e+08	2.94915e+08
Phosphorus	CHE	2.20848e+07	2.31009e+07	2.21893e+07	2.20852e+07	2.21484e+07	2.06544e+07	2.07717e+07	2.05186e+07	1.90177e+07	1.99017e+07	2.30992e+07	2.69957e+07	2.6198e+07	2.94342e+07	2.69729e+07	2.74145e+07	2.54071e+07	2.90258e+07	2.23761e+07	2.65806e+07	3.00587e+07
Phosphorus	TUR	2.15711e+08	1.67387e+08	1.86798e+08	2.16205e+08	2.11964e+08	2.20734e+08	2.30657e+08	2.01596e+08	1.37709e+08	2.14571e+08	2.4948e+08	2.19759e+08	2.05489e+08	2.33745e+08	2.14739e+08	2.25021e+08	2.99485e+08	2.89239e+08	2.27753e+08	2.4244e+08	2.86189e+08
Phosphorus	TWN	2.57671e+08	1.34663e+08	8.13905e+07	5.79725e+07	4.62563e+07	4.09529e+07	4.15391e+07	3.53334e+07	2.88414e+07	2.72891e+07	4.50112e+07	3.49629e+07	3.73372e+07	4.40804e+07	4.29929e+07	3.89878e+07	3.15298e+07	3.6194e+07	3.38408e+07	3.0952e+07	2.9385e+07
Phosphorus	NOR	2.02395e+07	2.1634e+07	2.15513e+07	2.25282e+07	2.0045e+07	1.94756e+07	2.11415e+07	2.09008e+07	1.85746e+07	1.71678e+07	1.87312e+07	1.83586e+07	1.9923e+07	2.17725e+07	1.89212e+07	2.01236e+07	1.74734e+07	2.12347e+07	1.70361e+07	1.95342e+07	1.97816e+07
Phosphorus	IDN	5.41425e+07	5.16292e+07	5.99849e+07	1.27142e+08	1.20063e+08	9.67467e+07	1.59841e+08	1.62141e+08	1.49427e+08	1.97068e+08	2.25538e+08	2.62957e+08	5.42615e+08	4.15885e+08	5.4091e+08	5.94534e+08	5.53656e+08	6.70479e+08	6.44738e+08	3.47425e+08	3.06621e+08
Phosphorus	ZAF	7.88509e+07	9.71319e+07	8.78976e+07	8.98942e+07	9.93842e+07	6.58943e+07	8.44985e+07	6.87554e+07	6.6966e+07	7.33234e+07	8.10537e+07	8.27878e+07	8.95397e+07	1.18592e+08	1.05528e+08	1.05212e+08	8.9133e+07	1.12834e+08	1.24337e+08	1.31025e+08	1.16904e+08
Phosphorus	WWA	1.19827e+09	1.11759e+09	1.21781e+09	1.17612e+09	1.23888e+09	1.33148e+09	1.26728e+09	1.423e+09	1.08369e+09	1.38968e+09	1.43373e+09	1.44508e+09	1.416e+09	1.58128e+09	1.63992e+09	1.53054e+09	1.91931e+09	1.60842e+09	1.91312e+09	1.51807e+09	1.95446e+09
Phosphorus	WWL	3.94914e+08	4.64591e+08	3.77286e+08	4.28756e+08	4.726e+08	4.8383e+08	6.02538e+08	7.55933e+08	5.50396e+08	4.55464e+08	7.15541e+08	7.57081e+08	7.91233e+08	8.50245e+08	8.27739e+08	6.98152e+08	6.39834e+08	6.63877e+08	6.0915e+08	5.665e+08	7.1113e+08
Phosphorus	WWE	6.78227e+07	6.63321e+07	6.12462e+07	8.45726e+07	9.28011e+07	1.11e+08	1.70639e+08	1.90325e+08	1.70457e+08	1.57067e+08	1.51856e+08	1.75004e+08	1.72472e+08	1.80757e+08	1.44162e+08	1.44916e+08	1.4871e+08	1.61832e+08	1.6122e+08	1.56779e+08	1.92667e+08
Phosphorus	WWF	2.87611e+08	2.87741e+08	3.52766e+08	3.34004e+08	3.08931e+08	2.95934e+08	3.40094e+08	3.99865e+08	3.13985e+08	3.695e+08	4.5418e+08	4.66903e+08	5.57082e+08	5.36487e+08	5.31976e+08	5.53541e+08	5.43826e+08	6.01688e+08	5.01096e+08	5.77797e+08	5.87988e+08
Phosphorus	WWM	4.8063e+08	4.78097e+08	4.60065e+08	4.19694e+08	4.74421e+08	5.07676e+08	6.0814e+08	7.00923e+08	5.22982e+08	6.34792e+08	6.8365e+08	7.43454e+08	6.12409e+08	6.93787e+08	7.15159e+08	7.18929e+08	6.28563e+08	7.26401e+08	6.45997e+08	7.3871e+08	8.97347e+08
Phosphorus	Advanced	5.24746e+09	5.17136e+09	5.08276e+09	5.43667e+09	5.43559e+09	5.28505e+09	5.30711e+09	5.22607e+09	4.01448e+09	4.0175e+09	4.5415e+09	4.54754e+09	4.83798e+09	4.78203e+09	4.64472e+09	4.7417e+09	4.48921e+09	4.80435e+09	4.53475e+09	4.64749e+09	4.75502e+09
Phosphorus	EmergingDeveloping	8.89749e+09	9.22776e+09	9.73997e+09	9.91103e+09	1.09336e+10	1.11803e+10	1.18426e+10	1.17505e+10	1.12214e+10	1.2616e+10	1.43034e+10	1.468e+10	1.42269e+10	1.4536e+10	1.47179e+10	1.43885e+10	1.45124e+10	1.4831e+10	1.47525e+10	1.42754e+10	1.59997e+10
Phosphorus	Global	1.41449e+10	1.43991e+10	1.48227e+10	1.53477e+10	1.63692e+10	1.64654e+10	1.71497e+10	1.69766e+10	1.52358e+10	1.66335e+10	1.88449e+10	1.92275e+10	1.90649e+10	1.93181e+10	1.93626e+10	1.91302e+10	1.90016e+10	1.96354e+10	1.92873e+10	1.89228e+10	2.07547e+10
Water	AUT	2139.51	2174.59	1988.86	1801.82	2092.6	2072.36	2037.94	1957.75	1866.37	1828.31	1430.31	1479.39	1543.87	1312.97	1460.21	1307.27	1275.64	1367.57	1347.96	1473.65	1319.89
Water	BEL	5888.1	5556.08	4767.27	5667.66	5723.84	5213.4	5487.37	5307.56	6354.46	7127.64	3352.02	3045.87	3356.47	3076.04	3391.88	2695	3029.89	3147.32	2872.46	2577.76	2507.88
Water	BGR	1025.2	795.766	681.751	928.694	940.878	885.793	856.607	848.37	1063.1	970.841	583.033	589.713	690.234	478.789	517.326	526.166	525.867	539.961	444.861	536.269	524.927
Water	CYP	416.969	356.386	319.83	313.135	380.592	332.135	339.274	329.227	560.87	369.386	303.797	297.125	295.324	274.051	278.494	265.862	321.309	263.714	306.978	266.515	261.898
Water	CZE	1280.67	1464.77	1658.99	1436.08	1909.7	1850.95	1474.25	1733.06	1680.83	1330.29	1036.54	1119.71	1126.72	895.381	895.654	831.603	814.466	919.037	778.73	858.602	789.756
Water	DEU	19274.8	20421.5	17160.3	20706.6	20696.5	21253.5	24132.6	23989.1	23631.6	22008.7	18224.2	19056	20559.2	16309.1	16244.2	15726.4	14002.6	15449.6	14237.6	16067.4	16297.7
Water	DNK	1187.18	1247.94	1078.75	1138.48	1161.39	1267.75	1415.95	1366.73	1580.43	1498.92	948.572	1276.66	1290.66	1034.23	1113.06	982.379	980.025	924.755	929.544	1147.51	1044.02
Water	EST	28.7826	74.7987	104.053	125.841	172.248	173.227	246.092	220.21	232.403	170.543	86.6798	116.485	129.615	129.85	128.208	118.851	111.32	114.844	128.998	134.361	122.883
Water	ESP	26200.6	26981	26045.7	30038.4	28641.1	32524.6	27501.5	25238	25591.9	27792.5	21644.3	22023.2	23254.6	18131.8	18611.8	18523.2	16674.7	17602.1	16476.8	15806	21152.5
Water	FIN	1270.52	1326.09	1131.22	1398	1546.01	1494.14	1638.44	1512.2	1509.89	1603.23	1191.44	1057.41	1331.64	1158.98	1101.4	992.276	975.658	1040.61	972.243	984.939	940.223
Water	FRA	18499.9	18532.1	16027.8	18977.2	19863.2	19285.6	18536.2	18226.2	17181.4	13956.3	11389.3	12198.9	14567.1	12869.2	13007.9	12346.2	11886.2	12577.6	11426.8	12531	12024.7
Water	GRC	8709.77	7886.58	6224.83	7314.32	8557.29	7288.6	7469.74	8098.3	9408.94	7475.96	5486.93	5833	5873.53	4844.66	3663.85	3509.92	3696.4	3753.31	3245.71	3617.26	3754.77
Water	HRV	263.749	290.985	288.271	330.999	369.996	358.028	380.777	360.155	533.145	400.951	262.534	216.206	213.003	189.672	195.648	174.861	165.364	166.331	185.398	251.714	177.672
Water	HUN	735.824	738.966	803.316	891.102	846.214	752.61	781.625	780.321	888.53	735.63	462.233	480.152	463.435	432.53	444.986	389.631	430.187	497.51	403.014	407.114	404.965
Water	IRL	1122.68	1191.99	955.524	1112.35	1149.33	1301.14	1557.23	1470.96	1495.77	1428.75	645.876	639.596	647.148	655.02	754.996	965.028	1072.48	1269.51	1053.91	1562.08	1075.45
Water	ITA	21096.2	20646.3	19160.7	21733.1	19780.6	20124.4	22369.7	20675.5	18980.3	20191.5	16570.6	16188.2	15233.1	13369.9	11732.6	12935.7	12083.1	16004.1	12653.9	11962.1	11673.6
Water	LTU	22.5105	51.4143	156.987	179.974	279.011	380.196	472.698	482.051	571.264	391.223	177.638	198.711	524.465	274.915	562.522	242.183	219.323	186.744	224.802	273.61	250.942
Water	LUX	663.766	590.028	508.923	586.035	685.961	638.152	661.991	641.92	738.93	802.323	405.557	379.029	430.4	429.442	501.346	368.533	442.003	340.901	213.445	425.537	401.877
Water	LVA	8.75865	36.9662	25.9771	60.4048	108.735	209.628	581.282	1277.14	926.062	256.436	125.169	170.794	501.853	195.749	480.55	492.948	1083.16	1590.67	1035.55	1203.43	1867.68
Water	MLT	5.95779	4.52801	4.14365	5.39785	6.50135	7.09927	6.87011	7.47209	5.92666	5.2484	5.05141	4.26297	4.35672	6.77998	6.33347	13.7428	29.6637	33.6279	58.2185	66.9689	55.5959
Water	NLD	7943.82	8302.72	7572.55	9748.78	8056.32	8331.73	8878.35	9608.48	8298.99	9458.4	3939.05	3993.86	5195.01	4054.11	4694.17	5280.07	3938.59	5120.44	4529.33	4549.05	5008.75
Water	POL	2656.04	2907.45	2767.42	2680.09	3017.19	2612.67	2240.75	2608.35	2888.33	2348.77	2349.52	2197.47	2501.59	2128.88	2563.01	3250.26	2207.07	2525.79	2343.64	2585.6	2427.55
Water	PRT	4136.7	3953.33	3796.44	3841.84	3295.71	3409.1	3129.05	3236.49	3371.82	3012.16	2861.92	2586.38	2713.23	2576.78	2322.51	2587.14	2378.86	2499.34	2077.25	2402.81	2228.58
Water	ROM	1576.52	1637.25	1390.02	1668.68	1816.59	1286.63	1522.06	1744.22	1976.36	1562.63	1368.11	1234.69	1124.9	973.683	1374.27	1076.42	936.919	1209.74	1197.32	1389.33	1304.1
Water	SWE	1919.24	1960.06	1771.53	1884.02	1799.73	1838.86	2114.3	2043.43	2043.85	2143.96	2113.01	2010.3	2323.26	2316.38	2316.14	1713.21	1699.29	2087.33	1707.19	1752.62	1675.24
Water	SVN	423.609	471.392	428.008	446.695	584.371	520.448	505.013	472.083	557.811	635.488	608.697	573.038	704.615	582.507	454.006	477.457	482.019	467.075	427.926	470.551	732.985
Water	SVK	332.202	472.439	502.314	616.194	767.281	636.499	549.252	524.591	526.471	497.626	429.544	394.857	418.585	382.875	437.42	480.226	404.627	397.109	392.075	414.031	373.49
Water	GBR	19578.7	20416	19015.1	20109.8	22858	23586.8	25521.8	22704.3	22351.8	20516.2	17143.5	16788.6	18770.2	16425.3	17007.6	16650.2	14219.1	14178.6	13638.3	15580.2	13586.1
Water	USA	95239.9	87727.5	97239.5	103320	94726.5	97620.2	104259	91308.2	94131.4	73807.4	84316.3	85187.5	98834.4	94710.1	90201.6	77782.5	81226.8	82781.9	79020.2	77163.6	77380.9
Water	JPN	28325.7	26673.3	24893.7	23793.2	27003.5	28465.8	30846.6	28453	27630.4	22970	19830	24049.4	23766.8	19953	19685.9	15356.9	11971.6	14402.9	12962.3	14460.3	12362.3
Water	CHN	103921	97873.6	92752.4	89685.2	89826.4	103072	111317	111283	115905	137931	147901	166282	160857	166560	175121	178881	164011	176789	176755	195915	188260
Water	CAN	4792.27	5248.96	5178.85	5593.16	5842.22	6515.13	7409.8	7848.08	6892.88	7143.82	6730.7	7394	7813.23	6761.21	6185.13	6056.58	5437.47	6036.18	5547.94	5735.66	6034.03
Water	KOR	8225.69	9521.79	16047.9	9803.48	11718.8	11591.4	13351.3	14919.8	12019.2	8969.34	9313	12093.3	12758.6	12083.6	10159.8	8877.36	8254.7	9885.65	9719.32	8931.32	8474.3
Water	BRA	5812.12	4741.03	4907.36	5023.49	4827.68	4819.66	5298.92	5832.46	6709.97	6227.44	6532.81	7854.23	7809.1	7584.11	7124.95	6180.89	5900.89	6281.47	5888.03	6262.23	6038.91
Water	IND	264605	271201	246156	257735	248399	256793	274758	281590	290351	281290	288852	270707	289065	279614	271874	286926	322742	325545	331875	331135	331953
Water	MEX	26742	28165.3	27532.1	25577.6	24238.1	26198.4	27334	25296.8	25296.6	27534.9	25154.2	26325	27753.4	24871.1	22687.7	21279.8	20209	22113.4	22700.2	22268.3	19285
Water	RUS	18043.5	18148.3	12243.6	13820	19483.1	16713	21643.3	22551.6	24825.2	21352.2	24635.4	25297.1	29347.5	30596.5	26414.2	21721.2	18635.8	19133.1	20350.6	21105.6	17719.4
Water	AUS	10968.7	14413.2	14811.7	12179.8	10897.4	11650.1	15385.5	11246.1	7989.01	8941.3	7347.3	8151.12	8853.62	9910.91	9457.96	9433.46	7209.43	9705.99	7599.78	6581.86	6486.39
Water	CHE	2688.2	2515.13	2316.83	2631.63	2510.92	2510.89	2416.77	2366.59	2694.71	2841.47	2049.16	2401.54	2621.76	2410.43	2298.36	2298.53	1905.27	2280.01	1812.85	2185.87	2340.33
Water	TUR	14388.9	11082.5	10857.1	12711.1	11571.4	13974.4	14492.7	14705	15776	10749.4	15614	11341.1	15293.8	14838.6	18950.2	15547.2	16021.3	17061	15025.4	15060.1	22237.2
Water	TWN	2994.68	2295.46	2733.9	2369.19	2541.36	2669.73	2733.5	2307.43	2278.15	2116.13	2141.83	1872.65	1655.72	2026.82	2048.66	1795.14	1616.2	1678.2	1610.35	1580.08	1338.39
Water	NOR	1131.81	1468.66	1235.31	1255.12	1392.71	1389.6	1476.52	1528.67	1897	1482.53	1432.3	1612.57	1588.76	1518.93	1158.93	1056.18	1056.72	1184.71	1164.14	1285.2	1089.08
Water	IDN	20165.8	19780.4	21162.7	20792.6	22337.1	22640.4	23519.9	26225.4	26424.9	24916.5	26438.9	28413.6	28284.9	27998.3	28979.8	26174.6	25411.6	26417.3	31014.6	26253.8	25001.6
Water	ZAF	7721.38	6703.02	6523.63	8723.25	8994.14	8513.63	7376.13	8781.01	7482.86	6468.68	5892.3	5469.46	6572.04	5662.82	5662.71	6336.34	5737.72	5814.26	5432.41	6025.93	5456.24
Water	WWA	112905	107510	123508	117560	126422	123877	112926	102428	110326	141088	134723	124464	137685	142098	141614	132800	144450	146108	154407	129946	146478
Water	WWL	13431.5	13650.4	13360.6	11791.4	11783.2	12915.4	15997.7	15726.1	17516.7	18788.8	16124.9	16910.8	17519.4	18399.8	18536	19201.6	15015.6	15356.7	14623.9	13821.7	14104.4
Water	WWE	4767	4704.42	4256.29	8589.05	5676.6	4320.91	6231.41	6118.67	7194.33	5945.96	5335.41	5071.07	6244.82	6168.1	4495.5	5372.62	4294.61	5602.85	5223.88	5004.54	5192.64
Water	WWF	47862.5	49922.9	60980.3	60051	55138.5	65079.9	57655.5	65975.1	70034.2	66872.7	68355.3	78180.4	79435.3	79882.9	83894.9	81583.3	85690	82832.4	73259.9	79445	78767.1
Water	WWM	155270	143167	151500	113071	127004	139784	130955	141839	155594	147272	147132	170541	157589	179158	176943	161636	162785	159189	154191	155344	154129
Water	Advanced	302775	300353	300794	316687	313740	322049	340288	317442	312350	278792	248306	258912	283681	254884	247458	227579	214764	234231	214747	219222	219492
Water	EmergingDeveloping	795635	776650	775740	745131	755702	798702	809505	828353	873435	896438	912691	936856	963456	983432	982297	963641	990904	1.00824e+06	1.01075e+06	1.00759e+06	1.01462e+06
Water	Global	1.09841e+06	1.077e+06	1.07653e+06	1.06182e+06	1.06944e+06	1.12075e+06	1.14979e+06	1.14579e+06	1.18579e+06	1.17523e+06	1.161e+06	1.19577e+06	1.24714e+06	1.23832e+06	1.22976e+06	1.19122e+06	1.20567e+06	1.24247e+06	1.22549e+06	1.22681e+06	1.23411e+06

## Sheet: Footprint_PerCapita
indicator	region	2000	2001	2002	2003	2004	2005	2006	2007	2008	2009	2010	2011	2012	2013	2014	2015	2016	2017	2018	2019	2020
Acid	AUT	10944.4	11626.4	11934	12425.6	12780.7	12791.1	12763.6	12771.7	12722.3	11920	11683.9	11418.3	10832.2	10887.7	10495.9	10488	10360.1	10929	10829.8	10440.2	9156.28
Acid	BEL	13300.3	13031.9	12448.1	13449.6	13063	13713.7	14586.6	14492.2	15851.7	14385.9	12690.1	12117.5	11395	11503.2	11432.2	11585.7	10903.8	11152.2	11725.1	10940.3	9863.48
Acid	BGR	4923.33	5287.92	5019.25	5586.83	5183.07	5470.69	5713.14	6348.57	5297.52	4991.6	4357.28	4694.79	4697.9	4257.46	4330.49	4288.61	4194.89	4219.08	3925.38	4009.56	3838.47
Acid	CYP	9473.82	9145.93	10113.6	10785.9	10797.2	11625.5	12915.1	13845	16658.5	15058.9	14295	13459	11802.1	10119.7	9806.77	8935.56	9211.52	9527.31	9223.33	9346.72	7748.09
Acid	CZE	10841.7	10942.5	10680.9	11636.7	10581.8	10323.3	11612.1	11389.3	11573.5	10104.8	10809.6	10941	9809.88	9554.62	8979.21	9032.16	8162.59	9322.75	8457.81	9428.44	7814.54
Acid	DEU	12539.7	12253.4	11739.6	12413	12275	12281.6	12513	12102.7	12527.6	11388.3	11374.6	11560.1	11071.4	11072.6	10898.8	10583.7	10785.5	11167.2	10950.7	10627.8	9236.59
Acid	DNK	13905.5	13675.1	12848.9	13751.6	14282.7	13239.1	14733.3	15373.3	14472.4	12774.2	12154.6	12049.9	10785.9	11469.9	11062.6	11281.2	12620.8	11351.5	8526.64	12156.9	10014.1
Acid	EST	9785.54	10222.3	9715.13	11291.6	11166	10465.1	12201	13528.8	11152.4	9162.11	10321.7	10016.4	8868.09	10153.4	9693.4	8708.21	8479.09	9142.14	8408.98	6421.77	6186.81
Acid	ESP	8292.69	8483.96	9089.89	9288.08	10053.8	10524.2	10510.8	11119.2	9778.51	8040.32	7359.32	7305.23	6483.42	5955.13	6127.75	6283.33	6031.67	6447	6187.61	6095.89	4976.83
Acid	FIN	12374	13341.7	12384.6	16044.1	14540.7	14618.7	16342.3	16102.9	14611.6	13322.8	14736.2	14377.1	12321.5	12248	11128.8	9890.99	10453.9	10400.1	10750.8	9856.5	7825.68
Acid	FRA	8316.09	8208.55	8139.23	8582.86	8889.11	8913.73	8788.29	8692.32	8613.87	7882.15	7821.58	7645.5	7521.47	7398.88	6958.51	6825.1	6954.29	7351.24	7168.1	6955.11	5813.43
Acid	GRC	10580.6	10445	10716.2	11540.7	11551	12331.1	13003.4	15156.5	13385.7	12847.4	12923.9	11152.4	9498.37	8958.5	9243.14	7100.67	6699.79	7673.25	8338.1	5878.11	7469.16
Acid	HRV	4287.13	4851.26	5274	6043.69	6011.44	6377.77	6390.17	6557.48	6718.61	5909.86	5377.22	5188.2	4504.94	4700.45	4416.21	4328.74	4725.13	4934.58	4960.24	4911.07	4636.6
Acid	HUN	5054.82	5440.43	5675.57	6648.58	6747.61	6579.05	6723.68	6657.37	6813.13	5726.76	5616.02	5443.79	5096.94	5165.82	5013.49	5139.2	5151.05	5260.08	5642.84	5961.03	4906.03
Acid	IRL	14092.1	15346.3	15007.7	17442	17424.7	19425.9	20784.2	21534.6	20433.9	17773.4	13367.5	12589.1	11309	10318.8	11691	11203.4	12866.7	16602	14922.4	26444.7	16102.7
Acid	ITA	9386.31	9266.66	9588.14	10064.2	10544.5	10548.3	10769.7	10651.1	10256.7	9336.52	9757.65	9422.87	8339.35	7788.59	7502.38	7510.31	7313.45	7287.23	7431.53	7030.95	6030.05
Acid	LTU	3176.98	3339.83	3413.74	3468.18	3892.51	4749.41	5115.02	5899.31	6017.02	4460.5	5136.81	5579.44	5581.87	4809.48	5067.09	4584.6	4443.66	4613.44	5107.5	5237.4	3952.52
Acid	LUX	23458	30053.4	30111	32286.3	37168.6	37327	35855.2	35837.1	36304.3	33104.1	29718.6	28174.4	28578.4	28401	32715	28835.2	31057.3	28583.4	26561.6	30533.8	28284.3
Acid	LVA	3479.68	3717.86	3847.33	4117.69	4310.59	4189.1	5566.36	6324.01	5888.15	3955.58	4079.02	4632.97	4064.44	4200.47	4985.11	4494.37	4394.04	4292.23	4668.67	4411.11	3809.23
Acid	MLT	7769.17	8377.91	7470.21	8444.41	8558.36	8839.05	8319.27	8212.52	8279.1	7551.21	7491.99	7340.39	7758.44	6541.47	6143.07	5568.6	6149.1	6077.94	6536.89	6619.52	6645
Acid	NLD	13417.6	13278.3	13175.1	13706	14291.6	13791.4	13857.6	14077.4	13994.4	12818.3	12057.6	12134.7	11613.4	11592.5	10901.7	11831.9	10520.2	11584.2	11290	12050	10250
Acid	POL	7126.67	7107.32	7006.07	7105.69	7065.21	7366.96	7379.92	7897.97	8100.93	7488.56	7880.39	7572.3	7348.29	7108.98	6998.83	6810.52	6882.95	7212.46	7343.53	6893.9	6529.29
Acid	PRT	7242.65	7267.44	7600.11	7228.18	7832.67	8045.95	7305.36	7245.44	7167.71	6604.47	6325	5822.89	4984.74	4643.35	4887.74	4696.08	4923.3	4950.34	5020.06	4661.39	4188.2
Acid	ROM	3677.44	3980.3	3923.76	4290.59	4115.92	4294.78	4731.86	5080.07	5088.57	4066.34	3801.71	4328.21	3971.26	3393.28	3252.52	3313.2	3381.82	3555.35	3790.64	3670.96	3482.15
Acid	SWE	9595.61	8976.62	9041.85	10144	9856.65	9597.68	9763.83	9662.76	9400.73	8177.01	8659.9	8495.25	7502.21	7659.8	7566.31	7568.78	7442.6	7265.89	7317.18	7200.07	6091.48
Acid	SVN	7901.88	7177.67	7251.38	8239.16	8009.22	8029.36	8161.3	8980.31	10374.1	8057.23	8226.03	8307.28	7399.46	6817.47	6333.83	6482.03	6385.87	6529.46	6085.94	6293.35	6287.06
Acid	SVK	6962.67	6829.67	6748.03	6789.41	6735.26	7046.04	7172.54	8101.63	8858.32	7323.27	7271.66	7033.36	6158.59	6231.5	5907.23	5960.31	6134.41	6335.77	6545.31	6483.19	5649.91
Acid	GBR	11987.9	12007.5	12050.6	12129.7	12730.3	12710.8	13308.2	13042.7	12104.2	10327.6	10725.2	10328	10170.5	9985.25	9797.16	9721.4	9001.53	8810.64	8690.11	8769.63	6774.3
Acid	USA	22669.1	22545.9	22217.5	22342.8	22610	22863.9	22506.7	22454.5	20620	18963.9	19664.3	18840.6	17892.3	18169.6	18452.2	18213	17383.7	17246.7	17740.4	19589.6	14879.8
Acid	JPN	11594.7	11361.8	11279.7	11482.6	11549.9	11848.7	11842.2	11664.1	11509.7	10549.2	10975.5	11971.3	12162.5	11632.3	11190.3	10454.5	10054.2	9990.44	9653.12	9660.97	8654.4
Acid	CHN	2245.16	2362.59	2482.25	2806.22	3220.88	3465	3612.2	3950.55	4095.05	4850.32	5131.22	5635.92	5715.68	6049.8	6101.43	6113.53	6040.56	6084.15	6385.37	6463.05	6370.06
Acid	CAN	14741.3	14613.9	14489.3	16089.7	16227.4	15792.2	15821.9	16238.6	16146.9	13863.7	16052	16306.1	15652.2	15564.2	12824.2	11325.9	12909.7	13610.3	7428.04	-24805.6	13378.3
Acid	KOR	9414.41	9466.47	10037.8	10530.3	10729.7	11322	12436.8	12766.3	12154.7	10629.1	11660.5	12565	12248	11822.6	11358.6	11493	11336.6	12394.2	11981.6	11828.5	10762.7
Acid	BRA	1967.3	1984.62	1933.17	1899.48	1825.26	1863.41	1880.17	1999.32	2264.6	2090.12	2535.16	2713.83	2819.24	2993.39	3017.7	2600.89	2337.43	2420.91	2311.25	2371.09	2040.82
Acid	IND	865.469	861.26	880.428	880.121	913.546	965.872	987.605	1107.9	1121.28	1246.98	1350.38	1439.7	1499.07	1428.5	1573.96	1612.5	1593.58	1715.4	1758.88	1729.56	1568.41
Acid	MEX	4258.74	4176.58	4170.49	4073.26	4129.42	4251.61	4432.89	4461.27	4501.47	4038.65	4162.96	4211.34	4203.03	4049.53	4000.6	3988.88	3938.89	3953.96	3799.84	3723.24	2793.11
Acid	RUS	5896.03	6492.61	6133.63	6530.04	6835.33	6831.76	7595.49	8005.42	8320.77	7349.67	7419.68	8176.54	8328.76	8402.79	7846.75	7373.53	7371.57	7756.34	7635.32	7724.47	7476.88
Acid	AUS	18007.9	17706	19055.6	18451.2	19653.3	19928.9	20239.5	21106.1	19600.2	20142.6	19455.3	20475.5	19867.2	19070.6	18621.3	18715.2	17754.4	18340.1	17005.5	17212.4	15742.9
Acid	CHE	12419.3	11991.9	12208.1	12521.2	12940.6	13532.3	12854.7	12856.7	13464.2	13709.6	14571.5	16694.1	14889.8	15098.2	13669.7	14622.1	14868.7	14797.3	14070	14500.9	14517.6
Acid	TUR	3895.91	3117.96	3359.87	3483.46	3789.62	4147.99	4466.4	4904.09	4721.45	4165.58	4785.88	5306.13	5398.18	5560.16	6218.08	5964.82	5540.02	5931.97	5374.49	4753.9	4995.94
Acid	TWN	12085.3	12276.8	11892.6	12270.4	13828.7	13214.7	13280.6	12344.2	12701.9	10797.9	12422.9	12174.9	12109.2	11981.5	11749.7	11567.3	11724.1	11486.5	11949.3	11536.2	10503.2
Acid	NOR	11863.7	11625.9	12414.7	12622.7	12587.5	12476.6	13464.4	14287.7	13684.6	13473.3	14270.9	13943.3	13509.8	13841.2	11923.3	13777.2	11775.2	12652.9	11959	12488.5	9753.35
Acid	IDN	1049.09	1109.5	1221.36	1295.74	1295.77	1268.57	1393.52	1465.62	1601.72	1438.16	1624.89	1837.19	1858.08	1835.62	1947.64	1890.13	1821.13	2027.91	2145.73	2300.04	2069.47
Acid	ZAF	5706.82	5581.04	5905.76	6608.36	7259.84	6921.22	6735.86	7018.33	7353.79	7057.48	7078.72	6692.73	7271.26	7066.75	7171.58	6668.89	6339.84	6477.28	5855.77	6599.26	6339.83
Acid	WWA	1583.85	1546.28	1667.36	1666.15	1771.59	1882.81	1960.69	1890.17	1983.6	2019.65	2341.32	2217.43	2524.57	2583.53	2393.71	2269.14	2762.7	2473.03	2916.91	2784.49	2740.67
Acid	WWL	2159.49	2088.42	1853.56	1870.7	1893.59	2269.04	2430.76	2522.36	2706.91	2444.94	2863.09	3044.81	3174.7	3241.21	3134.85	3306.2	2914.62	2951.32	2650.34	2759.52	2311.99
Acid	WWE	4540.26	4937.33	5130.94	5381.35	4823.67	4905.78	5669.37	6419.48	5909.76	5126.85	5261.3	5309.45	5457.5	5002.6	4231.91	3916.79	3848.69	3565.09	4067.38	3736	3604.66
Acid	WWF	459.368	482.858	491.66	508.739	520.053	530.227	540.147	642.486	675.751	670.428	704.517	724.024	720.168	791.672	800.53	824.095	850.478	889.455	826.131	856.148	792.21
Acid	WWM	4645.77	4908.65	5053.52	5001.14	5195.22	5569.29	5761.85	5842.38	6709.49	6767.79	7066.2	6733.6	7159.1	7264.3	7271.52	7232.56	7154.09	6932.98	6901.54	7611.39	6991.03
Acid	Advanced	15018.5	14939.1	14859.6	15244	15506.7	15683.9	15776.8	15809	15054.4	13678.9	14106.1	13993.7	13409.3	13289.9	13055.9	12777	12406.4	12536.4	12313.2	11736.3	10766.8
Acid	EmergingDeveloping	1867.4	1910.36	1954.42	2049.32	2184.17	2305.18	2409.81	2555.61	2671.44	2793.11	2995.42	3133.55	3243.27	3320.37	3318.88	3280.54	3293.52	3302.94	3407.22	3446.48	3276.16
Acid	Global	3903.7	3914.65	3927.11	4053.8	4195.78	4312.98	4404.24	4522.27	4499.43	4390.37	4615	4706.42	4703.74	4742.76	4706.81	4632.92	4590.04	4615.36	4671.9	4622.53	4337.82
Biodiversity	AUT	6.55359e-11	6.86569e-11	6.82222e-11	6.91153e-11	7.04455e-11	6.7848e-11	6.85715e-11	6.93519e-11	6.57881e-11	6.33078e-11	6.31891e-11	6.41036e-11	6.21114e-11	6.43092e-11	6.04549e-11	6.18784e-11	6.26598e-11	6.69731e-11	6.61299e-11	6.22934e-11	5.83456e-11
Biodiversity	BEL	8.79846e-11	8.85494e-11	8.32611e-11	8.77723e-11	9.02648e-11	8.66381e-11	9.5341e-11	9.19683e-11	1.03373e-10	9.42206e-11	7.71855e-11	6.89184e-11	7.00416e-11	7.09207e-11	7.10335e-11	6.24855e-11	6.80297e-11	7.07512e-11	7.21408e-11	6.71971e-11	6.11027e-11
Biodiversity	BGR	2.97678e-11	3.13202e-11	3.1898e-11	3.2492e-11	3.29124e-11	3.15907e-11	3.27985e-11	3.51576e-11	3.25864e-11	3.13778e-11	2.28512e-11	2.26147e-11	2.54845e-11	2.06841e-11	2.18206e-11	2.22531e-11	2.15338e-11	2.27844e-11	2.25535e-11	2.35893e-11	2.30398e-11
Biodiversity	CYP	7.42717e-11	7.2703e-11	8.83323e-11	8.99708e-11	8.94754e-11	1.03855e-10	1.26505e-10	1.40339e-10	1.91051e-10	1.70545e-10	1.59682e-10	1.52448e-10	1.34691e-10	1.19904e-10	1.10576e-10	1.00467e-10	9.55597e-11	9.45282e-11	9.29316e-11	8.1536e-11	6.98638e-11
Biodiversity	CZE	3.81507e-11	3.95996e-11	3.94012e-11	4.11166e-11	4.21285e-11	4.0755e-11	4.3884e-11	4.4537e-11	4.4658e-11	3.8549e-11	3.83006e-11	4.2789e-11	4.08578e-11	3.77838e-11	3.62831e-11	3.61124e-11	3.53419e-11	4.06791e-11	3.95283e-11	4.03442e-11	3.67186e-11
Biodiversity	DEU	5.8299e-11	5.47378e-11	5.36238e-11	5.72414e-11	6.04467e-11	5.82463e-11	6.00831e-11	6.03301e-11	6.08597e-11	5.56214e-11	5.21063e-11	5.53379e-11	5.21951e-11	4.96304e-11	5.0119e-11	5.01003e-11	4.847e-11	5.35318e-11	5.32969e-11	5.34715e-11	4.7436e-11
Biodiversity	DNK	9.37118e-11	9.10151e-11	8.14067e-11	8.07041e-11	9.45333e-11	8.52874e-11	9.74977e-11	1.01501e-10	9.96966e-11	9.00533e-11	8.28124e-11	9.56981e-11	8.82917e-11	8.51901e-11	9.48317e-11	8.78295e-11	9.3826e-11	1.06774e-10	6.13141e-11	9.88564e-11	9.48814e-11
Biodiversity	EST	2.87176e-11	3.27407e-11	3.51589e-11	3.82178e-11	4.02433e-11	3.67841e-11	4.25803e-11	4.5738e-11	4.26036e-11	3.54921e-11	3.07496e-11	3.2988e-11	3.26625e-11	3.70814e-11	3.45154e-11	3.60715e-11	3.2972e-11	3.833e-11	4.3198e-11	3.40445e-11	4.15495e-11
Biodiversity	ESP	9.51622e-11	9.88625e-11	1.03397e-10	1.01559e-10	1.04002e-10	1.07778e-10	9.97436e-11	1.01158e-10	9.48973e-11	8.3454e-11	7.64307e-11	7.6166e-11	6.9028e-11	6.19412e-11	5.99217e-11	5.98011e-11	5.73073e-11	5.93656e-11	6.15033e-11	5.70501e-11	5.92864e-11
Biodiversity	FIN	6.82756e-11	6.74259e-11	6.21922e-11	7.53665e-11	7.67566e-11	7.79154e-11	8.28792e-11	8.19782e-11	7.86494e-11	7.61372e-11	6.9689e-11	7.36163e-11	7.25796e-11	7.28628e-11	6.78575e-11	6.40558e-11	6.44898e-11	6.60334e-11	6.6303e-11	6.42144e-11	5.48946e-11
Biodiversity	FRA	5.9924e-11	6.07033e-11	5.94513e-11	6.10632e-11	6.05901e-11	5.99368e-11	5.9986e-11	5.88368e-11	5.64196e-11	5.13232e-11	4.90178e-11	5.0341e-11	5.12428e-11	4.92783e-11	4.83473e-11	4.7008e-11	4.75433e-11	4.89781e-11	4.9484e-11	4.81422e-11	4.28848e-11
Biodiversity	GRC	1.72446e-10	1.57452e-10	1.4184e-10	1.51199e-10	1.60353e-10	1.66026e-10	1.71613e-10	2.1357e-10	1.74137e-10	1.79519e-10	1.82183e-10	1.57367e-10	1.39425e-10	1.34483e-10	1.30604e-10	9.62963e-11	9.39401e-11	1.13684e-10	1.24778e-10	8.00895e-11	1.25676e-10
Biodiversity	HRV	2.84557e-11	3.14511e-11	3.40162e-11	3.7894e-11	3.90159e-11	3.81075e-11	3.84824e-11	3.89304e-11	4.14887e-11	3.64379e-11	3.24184e-11	3.14999e-11	2.91477e-11	2.87953e-11	2.70157e-11	2.58553e-11	2.71576e-11	2.85254e-11	2.97321e-11	2.99514e-11	2.83884e-11
Biodiversity	HUN	3.24149e-11	3.16436e-11	3.39487e-11	3.41847e-11	3.90912e-11	3.72844e-11	3.32946e-11	3.43003e-11	3.34306e-11	2.88829e-11	2.30829e-11	2.65888e-11	2.44349e-11	2.43947e-11	2.43687e-11	2.33567e-11	2.57396e-11	2.5699e-11	2.54577e-11	2.51332e-11	2.28588e-11
Biodiversity	IRL	1.13951e-10	1.23656e-10	1.16757e-10	1.20916e-10	1.12156e-10	1.1769e-10	1.2629e-10	1.3195e-10	1.2185e-10	1.17125e-10	7.78831e-11	7.25618e-11	6.01701e-11	7.03087e-11	7.97733e-11	7.59781e-11	1.00607e-10	1.2408e-10	1.16041e-10	1.62308e-10	1.08606e-10
Biodiversity	ITA	7.86875e-11	7.69278e-11	7.84659e-11	8.02407e-11	8.3552e-11	8.04804e-11	8.63434e-11	8.45317e-11	8.12656e-11	7.67612e-11	7.42979e-11	7.34935e-11	6.65269e-11	6.26843e-11	5.82842e-11	6.10035e-11	6.03212e-11	6.24555e-11	6.10162e-11	5.57852e-11	5.06771e-11
Biodiversity	LTU	8.84792e-12	9.14111e-12	1.17094e-11	1.1743e-11	1.43991e-11	1.78066e-11	2.0654e-11	2.26962e-11	2.73593e-11	1.8506e-11	1.75332e-11	2.05285e-11	2.77948e-11	1.93602e-11	2.27969e-11	2.09734e-11	2.09089e-11	2.15046e-11	2.55692e-11	2.77105e-11	2.36538e-11
Biodiversity	LUX	1.78244e-10	1.87214e-10	1.56983e-10	1.70977e-10	1.96939e-10	1.99781e-10	2.04354e-10	1.99489e-10	2.09212e-10	1.90156e-10	1.75539e-10	1.79106e-10	1.81362e-10	1.93623e-10	2.19265e-10	1.81829e-10	2.06793e-10	1.81213e-10	1.72911e-10	2.41525e-10	2.1008e-10
Biodiversity	LVA	1.75973e-11	1.9811e-11	2.00509e-11	2.20671e-11	2.40632e-11	2.45221e-11	3.42545e-11	4.48083e-11	3.65484e-11	2.30628e-11	1.91761e-11	2.52319e-11	4.51534e-11	2.49141e-11	3.02022e-11	2.962e-11	3.25513e-11	4.1673e-11	3.78564e-11	4.05272e-11	4.59031e-11
Biodiversity	MLT	6.54852e-11	6.58253e-11	5.97863e-11	6.57089e-11	6.63949e-11	5.87782e-11	5.50532e-11	5.34148e-11	5.43781e-11	4.90721e-11	4.75503e-11	4.49382e-11	4.73457e-11	4.32017e-11	4.25656e-11	3.81666e-11	4.23657e-11	4.10313e-11	5.24863e-11	5.8622e-11	5.03866e-11
Biodiversity	NLD	1.09964e-10	1.06092e-10	1.0487e-10	1.08967e-10	1.17777e-10	1.0548e-10	1.03131e-10	1.07743e-10	9.89312e-11	9.37764e-11	6.45097e-11	7.09906e-11	7.06032e-11	6.80109e-11	6.99739e-11	8.3802e-11	7.11065e-11	8.34182e-11	8.05217e-11	7.96995e-11	7.21688e-11
Biodiversity	POL	2.88697e-11	2.88809e-11	2.80541e-11	2.84183e-11	2.83207e-11	3.03433e-11	3.07005e-11	3.37198e-11	3.46216e-11	3.0997e-11	3.32664e-11	3.32277e-11	3.19141e-11	3.05051e-11	2.95687e-11	2.9887e-11	2.95385e-11	3.16606e-11	3.17326e-11	3.08451e-11	3.1116e-11
Biodiversity	PRT	6.3205e-11	6.37637e-11	6.51538e-11	6.50686e-11	6.30993e-11	5.93142e-11	5.76254e-11	6.22936e-11	6.15418e-11	5.53845e-11	5.57442e-11	5.06195e-11	4.42506e-11	4.32602e-11	4.25478e-11	4.44152e-11	4.20272e-11	4.39329e-11	4.67567e-11	4.53068e-11	4.30292e-11
Biodiversity	ROM	1.61596e-11	1.69989e-11	1.68867e-11	1.87259e-11	2.03343e-11	1.91706e-11	2.0538e-11	2.32903e-11	2.39753e-11	2.15386e-11	2.12992e-11	2.27402e-11	1.80525e-11	1.76777e-11	1.84768e-11	1.73583e-11	1.77063e-11	1.96432e-11	2.03984e-11	2.06463e-11	2.00372e-11
Biodiversity	SWE	5.86055e-11	5.51901e-11	5.42456e-11	5.80524e-11	5.88588e-11	5.79408e-11	5.91995e-11	6.09792e-11	5.85053e-11	5.44694e-11	5.92387e-11	6.00905e-11	6.03444e-11	6.09235e-11	5.97996e-11	5.69879e-11	5.55938e-11	5.86215e-11	5.48865e-11	5.21378e-11	5.03349e-11
Biodiversity	SVN	9.49086e-11	9.0137e-11	8.93694e-11	9.32183e-11	9.58879e-11	8.73683e-11	8.43788e-11	8.32833e-11	8.45193e-11	7.38826e-11	6.98089e-11	6.7561e-11	6.19156e-11	5.73381e-11	5.53834e-11	5.49434e-11	4.82513e-11	5.07211e-11	5.13036e-11	5.0436e-11	5.28808e-11
Biodiversity	SVK	2.16818e-11	2.20934e-11	2.31992e-11	2.43826e-11	2.64641e-11	2.70067e-11	2.82047e-11	3.14624e-11	3.45765e-11	3.00532e-11	2.65371e-11	2.76339e-11	2.62186e-11	2.58459e-11	2.76083e-11	2.75201e-11	2.48128e-11	2.81301e-11	2.75445e-11	2.96089e-11	2.64362e-11
Biodiversity	GBR	7.8268e-11	7.70765e-11	7.934e-11	7.85285e-11	8.41256e-11	8.65204e-11	8.40849e-11	7.32838e-11	7.0345e-11	6.02282e-11	5.84019e-11	6.04152e-11	5.93957e-11	5.81392e-11	5.83944e-11	6.70914e-11	5.36072e-11	5.50964e-11	5.5942e-11	5.4535e-11	4.62943e-11
Biodiversity	USA	2.38586e-10	2.25512e-10	2.28527e-10	2.25284e-10	2.15925e-10	2.19039e-10	2.13678e-10	1.95887e-10	1.86459e-10	1.67633e-10	1.8039e-10	1.84807e-10	1.88964e-10	1.83266e-10	1.75263e-10	1.69683e-10	1.71032e-10	1.68956e-10	1.63567e-10	1.61637e-10	1.59549e-10
Biodiversity	JPN	8.69363e-11	8.27267e-11	7.5787e-11	7.6785e-11	7.83754e-11	8.24357e-11	8.35019e-11	8.18579e-11	8.43195e-11	7.18629e-11	7.30623e-11	8.13473e-11	8.27906e-11	7.04804e-11	6.49585e-11	5.83394e-11	5.28725e-11	5.76022e-11	5.51316e-11	5.54361e-11	5.00733e-11
Biodiversity	CHN	2.00914e-11	2.03282e-11	2.05615e-11	2.11835e-11	2.31057e-11	2.41329e-11	2.5121e-11	2.57469e-11	2.66622e-11	2.93966e-11	3.01713e-11	3.33703e-11	3.60073e-11	3.74316e-11	3.86191e-11	4.24178e-11	4.04244e-11	4.05632e-11	4.38187e-11	4.59225e-11	4.76267e-11
Biodiversity	CAN	8.48871e-11	8.54921e-11	8.2718e-11	9.03132e-11	8.88236e-11	9.26507e-11	9.55646e-11	1.00279e-10	9.44547e-11	9.27436e-11	9.46581e-11	1.06775e-10	1.05302e-10	9.7946e-11	8.58925e-11	8.42051e-11	7.86518e-11	8.54915e-11	7.65794e-11	4.94762e-11	7.98213e-11
Biodiversity	KOR	6.11596e-11	5.92663e-11	6.93726e-11	6.5597e-11	6.8399e-11	7.38854e-11	8.12423e-11	9.14342e-11	8.27313e-11	6.52785e-11	7.69159e-11	9.23479e-11	9.17442e-11	8.27303e-11	7.43748e-11	7.2631e-11	7.22585e-11	8.05564e-11	8.05017e-11	7.37531e-11	6.94885e-11
Biodiversity	BRA	1.52793e-10	1.41165e-10	1.45692e-10	1.52103e-10	1.44993e-10	1.46665e-10	1.41109e-10	1.39673e-10	1.3939e-10	1.38701e-10	1.36591e-10	1.38141e-10	1.28708e-10	1.32114e-10	1.23533e-10	1.06145e-10	1.244e-10	1.22392e-10	1.00295e-10	9.95255e-11	8.14668e-11
Biodiversity	IND	2.86186e-11	2.88721e-11	2.65141e-11	2.74855e-11	2.6747e-11	2.76317e-11	2.8421e-11	2.90299e-11	2.90754e-11	2.90207e-11	2.9897e-11	2.9077e-11	2.99369e-11	2.92589e-11	2.96665e-11	3.21341e-11	3.42413e-11	3.60437e-11	3.47469e-11	3.64239e-11	3.6113e-11
Biodiversity	MEX	3.52146e-10	3.57027e-10	3.43891e-10	3.23454e-10	3.04645e-10	3.2173e-10	3.17698e-10	2.99735e-10	2.98684e-10	3.02086e-10	2.7992e-10	2.77052e-10	2.83593e-10	2.65298e-10	2.45755e-10	2.38387e-10	2.19559e-10	2.31282e-10	2.38146e-10	2.35506e-10	1.95225e-10
Biodiversity	RUS	2.24371e-11	2.33938e-11	1.97481e-11	2.17103e-11	2.83924e-11	2.62697e-11	2.95002e-11	2.97284e-11	3.29794e-11	2.96846e-11	3.37188e-11	3.61541e-11	3.9031e-11	4.12965e-11	3.59449e-11	2.95781e-11	2.69542e-11	2.91448e-11	2.89428e-11	3.06482e-11	2.85196e-11
Biodiversity	AUS	5.12664e-10	6.13756e-10	6.13972e-10	5.65369e-10	4.82708e-10	4.95027e-10	5.13338e-10	4.3179e-10	3.16424e-10	3.73768e-10	2.94562e-10	3.0513e-10	3.3802e-10	3.32802e-10	3.20271e-10	3.10283e-10	2.77608e-10	3.11576e-10	2.65524e-10	2.38412e-10	2.55199e-10
Biodiversity	CHE	9.17033e-11	8.98659e-11	9.86774e-11	9.38271e-11	1.07035e-10	9.11584e-11	8.51332e-11	8.21628e-11	9.32946e-11	9.19743e-11	9.0051e-11	1.11222e-10	9.52928e-11	1.07795e-10	1.00065e-10	1.07177e-10	1.11511e-10	1.17182e-10	1.10094e-10	1.10425e-10	1.20085e-10
Biodiversity	TUR	5.87087e-11	5.22741e-11	5.49123e-11	5.68812e-11	5.31247e-11	6.00511e-11	6.0869e-11	6.23446e-11	5.99166e-11	5.08977e-11	6.13401e-11	6.04508e-11	6.23784e-11	5.89629e-11	6.19809e-11	6.12721e-11	6.13656e-11	6.019e-11	5.55523e-11	5.56795e-11	5.46132e-11
Biodiversity	TWN	6.47355e-11	5.46743e-11	5.00521e-11	4.99065e-11	5.36977e-11	5.21599e-11	5.15985e-11	4.59259e-11	4.63041e-11	3.84276e-11	4.91891e-11	4.94053e-11	4.52542e-11	4.69181e-11	4.21791e-11	3.953e-11	3.83662e-11	3.77394e-11	3.91385e-11	3.79844e-11	3.4154e-11
Biodiversity	NOR	8.33234e-11	8.9274e-11	9.13089e-11	8.88458e-11	9.03878e-11	9.04509e-11	9.78531e-11	1.03858e-10	1.02774e-10	9.18824e-11	9.27492e-11	9.41164e-11	9.1094e-11	9.10528e-11	7.23356e-11	8.45484e-11	7.29688e-11	8.2478e-11	7.77138e-11	7.91293e-11	6.27765e-11
Biodiversity	IDN	4.64146e-11	4.61388e-11	4.86337e-11	4.88772e-11	4.97356e-11	4.98957e-11	5.02167e-11	5.21122e-11	5.35455e-11	5.24002e-11	5.61726e-11	5.59616e-11	5.47211e-11	5.51028e-11	5.57511e-11	5.23083e-11	5.39651e-11	5.22047e-11	5.59115e-11	5.40035e-11	5.14138e-11
Biodiversity	ZAF	9.71606e-11	9.06854e-11	8.89824e-11	9.8818e-11	1.01379e-10	9.51925e-11	9.06876e-11	9.77599e-11	8.8692e-11	8.72574e-11	8.65162e-11	8.11726e-11	9.39152e-11	8.62012e-11	8.27184e-11	7.78314e-11	6.82531e-11	8.54176e-11	7.28008e-11	8.05165e-11	7.96184e-11
Biodiversity	WWA	2.97539e-11	2.68761e-11	2.94465e-11	2.71659e-11	2.83133e-11	2.82681e-11	2.5757e-11	2.57762e-11	2.66366e-11	3.05488e-11	3.0714e-11	2.8086e-11	3.1943e-11	3.23129e-11	3.02143e-11	2.99327e-11	3.61583e-11	3.15594e-11	3.60696e-11	3.12692e-11	3.37509e-11
Biodiversity	WWL	3.68692e-11	4.024e-11	3.67226e-11	3.46632e-11	3.33295e-11	3.57561e-11	4.08002e-11	4.38149e-11	4.47207e-11	4.2968e-11	4.32966e-11	4.29588e-11	4.70749e-11	4.82215e-11	4.6219e-11	4.47918e-11	3.90546e-11	3.87004e-11	3.34555e-11	3.14879e-11	3.15445e-11
Biodiversity	WWE	4.9229e-11	5.50417e-11	4.39061e-11	5.36653e-11	4.70303e-11	4.433e-11	5.14068e-11	5.54221e-11	4.63532e-11	4.25722e-11	4.05519e-11	3.88416e-11	3.77642e-11	4.48829e-11	3.63727e-11	3.66526e-11	3.69595e-11	3.40969e-11	3.31043e-11	3.69459e-11	3.56966e-11
Biodiversity	WWF	2.86e-11	2.8421e-11	2.90042e-11	2.86906e-11	2.83003e-11	2.79081e-11	2.71781e-11	2.78896e-11	2.72702e-11	2.70724e-11	2.67238e-11	2.83123e-11	2.77816e-11	2.82144e-11	2.82941e-11	2.84736e-11	2.83755e-11	2.7448e-11	2.61382e-11	2.69002e-11	2.65539e-11
Biodiversity	WWM	4.8571e-11	5.03787e-11	4.93021e-11	4.36052e-11	4.61193e-11	4.56347e-11	5.07749e-11	5.29206e-11	5.75495e-11	5.99138e-11	5.93621e-11	6.26505e-11	6.5854e-11	6.46531e-11	6.29581e-11	6.25451e-11	6.19692e-11	6.18016e-11	6.10209e-11	6.40102e-11	5.95028e-11
Biodiversity	Advanced	1.35341e-10	1.32377e-10	1.32787e-10	1.31916e-10	1.29349e-10	1.31112e-10	1.31024e-10	1.24428e-10	1.1782e-10	1.07817e-10	1.09346e-10	1.13835e-10	1.14631e-10	1.09654e-10	1.04628e-10	1.0186e-10	9.93053e-11	1.02239e-10	9.85851e-11	9.52988e-11	9.34683e-11
Biodiversity	EmergingDeveloping	4.008e-11	3.96883e-11	3.92736e-11	3.90205e-11	3.89813e-11	3.97872e-11	4.00902e-11	4.05313e-11	4.09369e-11	4.18877e-11	4.20321e-11	4.25381e-11	4.41084e-11	4.41837e-11	4.31687e-11	4.33559e-11	4.41091e-11	4.38844e-11	4.38947e-11	4.41558e-11	4.29669e-11
Biodiversity	Global	5.48301e-11	5.39472e-11	5.35681e-11	5.31328e-11	5.26261e-11	5.34926e-11	5.36581e-11	5.29807e-11	5.22865e-11	5.15615e-11	5.18443e-11	5.2864e-11	5.42398e-11	5.35247e-11	5.19292e-11	5.16873e-11	5.19621e-11	5.21788e-11	5.16609e-11	5.14114e-11	5.01246e-11
Climate	AUT	14036.8	14851.8	15355.7	15859.8	15924	15887.8	15858.7	15850.3	15564.3	14689.2	14296.3	14137.3	13520.3	13632.6	13204.3	13111.9	12898.8	13629.3	13572.7	12950.1	11553.5
Climate	BEL	16875	16600.5	15938.8	17108.3	16516.8	17057.7	18369.1	18115.7	19799.7	18062.9	15792.1	15041	14118.5	14261.7	14434.7	14139.9	13498.5	14016	14455.8	13494.5	12386.5
Climate	BGR	6424.98	6868.23	6789.15	7491.91	6936.3	7132.44	7320.37	8086.65	7071.13	6672.41	5795.76	6145.33	6169.94	5742.97	5781.06	5695.39	5653.51	5744.5	5298.28	5540.56	5216.37
Climate	CYP	10289.4	9912.27	11046.8	11745.9	11863.1	12659.9	14075.2	15082.3	18353.7	16461.5	15989.7	15056.8	13270.5	11453.8	11155.5	10328.8	10845	11703.4	11489.7	13184.2	10905.3
Climate	CZE	12981.8	13109.8	12811.7	13880.9	12668.3	12330.2	13810.9	13537.9	13724.4	12080.3	12901.3	13210.1	11943	11545.1	10979.5	11001.7	9938.32	11367.7	10375.3	11492.1	9653.32
Climate	DEU	15630.9	15052.5	14541.5	15249.3	15039.8	14814	14986.5	14569.7	15058.2	13874.2	13622.1	14056.3	13444.4	13394.9	13260.6	12834.5	13003.8	13558.1	13247.2	12961.5	11309.6
Climate	DNK	17696.6	17292.5	16375	17033.3	17845.9	16602.5	18057.5	18789.5	17693.6	15654.3	14750.6	15187.1	13923.8	14338.3	14055.8	14429.5	15563.2	14437.8	11459.9	15525.7	13078.2
Climate	EST	12493.7	12930.3	12661.5	14428.5	14275.6	13354.5	15294.3	16463.3	14044.5	11682.8	12602	12326.2	11324.5	12989	12350	11342	10939.3	12006.7	11525	9598.12	9389.62
Climate	ESP	11345.8	11586.7	12256.1	12458.5	13221.4	13639.4	13764.1	14293.8	12768.4	10660.9	9934.59	9768.28	8720.5	8019.28	8262.05	8296.28	7952.97	8439.56	8107.71	7962.07	6805.22
Climate	FIN	15954.1	16328.1	15235.7	19553.7	17860.1	18061.9	20074.6	19619.9	18689.1	17026.8	17943.1	17893.5	15663	15583.5	14326.5	12829.8	13296.4	13349.3	13744.2	12902.3	10381.2
Climate	FRA	11260	11124.7	11085.8	11528.7	11820.3	11813.3	11772.3	11509.4	11344.9	10435.5	10224	10030.5	9929.65	9700.8	9251.41	9028.19	9122.8	9584.47	9323.78	9035.61	7772.98
Climate	GRC	13415.5	13173.8	13562.1	14463.9	14383.5	15168.3	15817.3	18276.6	16505.3	15641.1	15647.9	13670.3	11966.8	11257.1	11515.5	9129.52	8645.33	9801.84	10583.2	7906.48	9519.57
Climate	HRV	5575.68	6191.59	6839.72	7787.85	7775.52	8125.9	8116.57	8194.33	8578.45	7483.93	6855.86	6734.73	5950.39	6079.94	5793.09	5670.58	6000.93	6420.98	6418.27	6611.56	6200.74
Climate	HUN	6622.55	6919.43	7282.78	8350.72	8553.66	8273.31	8363.84	8336.92	8475.23	7111.79	6924.78	6782.71	6347.58	6455.29	6383.14	6437.37	6366.43	6582.56	7015.66	7380.59	6309.38
Climate	IRL	20090.8	21795.3	22859.6	25376.3	24069.3	25885.5	27246.4	28214.7	26451.7	23984.2	17989.4	16767.9	14613.1	14233.8	16622.6	15303.8	17473.7	22023.2	19956.5	33378.1	20687.3
Climate	ITA	12323.4	12077.3	12608.5	13021.6	13451.6	13366.8	13843.5	13422.6	12966.9	11784.1	12285.2	11822.6	10601.4	9902.61	9598.69	9551.91	9280.4	9331.64	9436.33	8889.39	7770.8
Climate	LTU	5311.34	5356.68	5670.61	5723.92	6264.24	7153.72	7472.38	8395.29	8491.68	6652.19	7038.6	7621.86	7790.95	6885.1	7339.09	6978	6818.26	6857.67	7268.71	7913.19	6261.63
Climate	LUX	30942.1	37143.2	36277.5	39690.5	44040.1	44392.7	42730.5	42286.1	43079.2	39341.8	35938.3	34647.8	35050.3	36280.9	41290.8	35777.7	37725.9	35152.3	32847.2	38083.6	36101.5
Climate	LVA	4941.72	5196.3	5409.38	5807.37	6123.02	6198.26	7835.64	8784.1	8288.63	5828.88	5795.46	6618.97	5971.69	6149.91	7070.33	6587.35	6213	6637.46	6743.84	7012.38	6068.36
Climate	MLT	8788.47	9095.11	8137.07	9207.24	9365.68	9758.95	9192.19	9133.28	9251.11	8504.2	8400.19	8303.47	8631.03	7342.58	6938.25	6639.38	7905.36	8065.56	9032.89	12732.6	9560.38
Climate	NLD	17786.7	17448.4	17518.7	18172.6	18742.5	17783.7	18091.7	18131.1	18026	16406.1	15112.8	15170.4	14565.7	14621.8	13844.5	15639.8	13515.9	15020.7	14614.8	15532.8	13278.8
Climate	POL	9227.89	9258.09	9135.76	9128.52	8953.32	9329.68	9334.35	9950.93	10347.4	9389.16	9922.91	9583.12	9206.63	8905.47	8675.28	8443.45	8554.38	9014.8	9147.82	8614.09	8140.29
Climate	PRT	9878.62	9814.05	10127.7	9914.64	10321.5	10460.2	9609.02	9543.66	9505.31	8708.36	8443.69	7733.52	6703.79	6311.78	6596.37	6415.06	6481.87	6568.11	6727.86	6459.54	5981.53
Climate	ROM	4832.1	5157.8	5242.99	5824.17	5653.44	6065.47	6298.58	6604.28	6604.36	5466.85	5178.28	5769.76	5263.67	4611.85	4562.14	4646.51	4701.44	4940.49	5219.78	5133.16	4898.21
Climate	SWE	12722.8	11902.1	11995.1	13376	12924.4	12525.7	12481	12523.2	12241.9	10666.1	11171.3	11216.9	10039.7	10294.7	10100	10092.8	9798.62	9770.07	9648.74	9638.41	8345.37
Climate	SVN	10714	9868.72	10036.3	11446.5	11053.6	10797.8	10768.2	11524.9	13104	10410.2	10492.8	10668.9	9565.48	9005.94	8615.87	8640.57	8090.66	8532.62	7988.78	8778.4	8410.01
Climate	SVK	8684.26	8473.66	8467.1	8552.57	8385.38	8725.98	8833.35	9894.15	10880.1	9133.53	8970.8	8794.31	7681.77	8009.77	7670.25	7693.73	7762.14	8099.34	8492.51	8445.5	7482.31
Climate	GBR	15602.9	15639.4	15754	15874.4	16424.2	16378	17178.9	16422.5	15270.6	13135.9	13362.4	13022.6	12909.6	12677.4	12568.5	12516.2	11417.9	11373.2	11105.7	11156.4	8867.7
Climate	USA	27675.2	27595.8	27054.1	27219.1	27652	27843.8	27367.3	27091.8	24995.4	23012	23760.7	22881.7	21677.7	21749.2	22069.4	21881.5	20850	20778.2	21110.6	22983	18127.1
Climate	JPN	14191.9	13796.8	13525.8	13882.3	13843.5	14177	14275.2	13911.1	13709.8	12306.4	12874.7	14201.9	14230.8	13406.1	12975.8	12061.9	11383.1	11614.5	11136	11153.4	9971.84
Climate	CHN	3026.02	3171.4	3283.35	3663.52	4188.74	4462.27	4643.91	5001.29	5188.58	6072.25	6358.43	6975.82	7078.17	7455.06	7553.14	7605.28	7442.11	7548.99	7981.16	8067.21	8000.17
Climate	CAN	18057	17773.2	17852	19909.4	19653.8	19374.7	19552.2	19900	19714.4	17089.6	19310.9	19811.5	19305.7	19075.1	16041.5	14468.4	15836.1	16703.4	10372.8	-21830.6	16204.7
Climate	KOR	12349.8	12182.1	12954	13723.3	13555.8	14254.7	15796.3	16132.5	15061.1	12985.5	14410.2	15906.4	15294.6	14486.8	14010.5	13991.6	13678	15225	14717	14384.1	13140
Climate	BRA	4860.5	4911.33	4992.8	5051.83	4887.88	4948.42	4863.66	5009.4	5249.76	4976.54	5548.97	5673.19	5628.78	5798.07	5817.17	5219.64	5131.27	5196.42	4749.92	4767.32	4185.15
Climate	IND	1584.92	1553.52	1543.82	1588.25	1602.33	1669	1712.72	1817.99	1861.28	1982.8	2109.37	2193.71	2216.7	2133.53	2270.34	2317.37	2291.97	2462.91	2494.36	2466.28	2276.25
Climate	MEX	6039.27	5974.07	5999.42	5760.02	5725.31	5934.74	6122.7	6160.15	6223.32	5613.46	5741.22	5789	5749.74	5578.52	5519.05	5496.17	5416.84	5483.58	5304.47	5216.11	4172.65
Climate	RUS	7368.18	8069.19	7552.38	7985.01	8754.73	8677.78	9484.45	9978.46	10317.2	9399.38	9289.22	10163.1	10373.1	10504.8	9856.82	9174.16	9199.67	9699.86	9460.48	9599.3	9436.34
Climate	AUS	25196.4	26329.9	27484.2	24741.9	27103.5	26548.6	27634.6	28581.2	25393.4	26180.9	24540.7	27624.4	27286.9	24396.2	24446.5	24820.9	22140	24090.3	21512.5	21459.8	20001.3
Climate	CHE	15728.6	15155.4	15563.6	16035.9	16284.1	17102.5	16126.5	16134.4	16957.4	17149.6	18045.3	20825.1	18698.4	18808.2	16978.6	17952.7	18027.3	18118.4	16921.4	17757.7	17920
Climate	TUR	4961.73	4066.02	4452.25	4643.23	4890.62	5365.28	5760.05	6268.05	6067.96	5332.57	6341.57	6952.13	6947.8	7159.27	7860.27	7626.49	7214.49	7666.69	7119.35	6421.9	6716.1
Climate	TWN	19805.8	17213.5	16651.6	15995.8	17423.7	16145.4	15536.7	14421.5	14691.8	12374.6	14114.4	13681	13522.9	13504.8	13205.9	12914.2	12945.7	12728.9	13247.7	12915.3	11707.8
Climate	NOR	15910.6	15394	16585.3	16915.9	16467.5	16165.1	17422.3	18031.7	17432.6	17123.2	17849.1	17741.4	17162.1	17583.7	15272.2	17245.7	14888.4	16257.5	15131.7	16063.2	12887.7
Climate	IDN	1646.26	1690.1	1848.51	1937.95	2004.84	1927.42	2136.93	2247.76	2426.7	2207.55	2446.66	2799.5	2940.63	2896.94	3128.85	3021.37	2913.76	3236.58	3383.1	3698.53	3337.21
Climate	ZAF	7554.86	7314.14	7731.62	8410.21	9141.04	8520.75	7927.62	8648.49	8927.43	8620.45	8463.44	8022.42	9273.23	8973.15	8910.29	8364.11	7770.98	8321.64	7481.05	8260.08	8057.68
Climate	WWA	2654.07	2531.04	2704.13	2643.49	2825.92	2932.82	2883.14	2871.09	2942.93	3157.27	3512.08	3241.59	3698.8	3724.93	3472.94	3277.65	4095.7	3561.52	4261.54	3902.35	4019.06
Climate	WWL	3727.08	3843.89	3535.59	3484.87	3393.74	3895.06	4270.1	4487.17	4691.85	4257.91	4701	4876.85	5077.74	5170.69	5041.79	5099.35	4510.16	4579.41	4040.16	4179.27	3802.06
Climate	WWE	5946.67	6525.04	6601.26	6883.27	6260.7	6337.63	7272.34	7974.26	7568.87	6469.9	6617.8	6583.2	6840.08	6402.31	5429.23	5059.77	4989.04	4691.89	5217.57	4862.43	4762.73
Climate	WWF	1573.89	1579.57	1614.35	1669.88	1642.63	1671.49	1646.21	1824.82	1776.48	1764.42	1822.28	1883.91	1841.73	1942.33	1963.1	1964.11	2050.56	2026.55	1977.05	2063.7	1984.68
Climate	WWM	6850.05	7055.75	7114.73	7000.82	7200.09	7697.54	7993.35	7966.2	9029.35	9048.43	9412.12	9156.36	9607.35	9534.97	9622.87	9722.34	9752.51	9533.98	9345.26	10177.3	9566.04
Climate	Advanced	18970.5	18788.7	18669.3	19066.7	19316.4	19420	19554.5	19432.4	18518.2	16827.4	17231.2	17246	16513.7	16197.6	15978.1	15657.8	15065.9	15377.2	15005.1	14434.5	13287.5
Climate	EmergingDeveloping	2939.71	2980.13	3024.45	3135.95	3303.75	3446.17	3555.66	3732.69	3862.63	4014.84	4241.6	4398.43	4533.65	4609.4	4610.79	4556.37	4604.53	4604.77	4742.35	4771.44	4614.08
Climate	Global	5421.9	5412.05	5415.93	5556.07	5721.55	5843.42	5942.79	6062.36	6026.1	5894.81	6135.07	6259.14	6254.73	6262.73	6231.1	6137.31	6092.91	6135.95	6199.7	6142.31	5843.39
Land	AUT	0.00500136	0.00515237	0.00527915	0.005284	0.00507048	0.00479974	0.00483209	0.0048061	0.00462309	0.00481315	0.00479103	0.00476761	0.00452947	0.00459944	0.0044552	0.00464982	0.00459023	0.00462831	0.00458973	0.00416693	0.00419205
Land	BEL	0.00652695	0.00564698	0.00549904	0.00588883	0.00578407	0.00561277	0.00583633	0.0054099	0.00659367	0.00631644	0.00534792	0.00420328	0.00445023	0.00518913	0.00446534	0.00377431	0.00475882	0.00529761	0.00494787	0.00434532	0.00390469
Land	BGR	0.00425931	0.0044433	0.00460926	0.0046967	0.00465581	0.00435041	0.00426987	0.00408801	0.00383949	0.00390152	0.00254916	0.00239595	0.00299326	0.00198597	0.00224781	0.00235284	0.0021929	0.00243978	0.00224527	0.00229541	0.00244785
Land	CYP	0.000506612	0.000451993	0.000472262	0.000506977	0.000519985	0.000527886	0.000525508	0.000506214	0.000879706	0.000512947	0.000441259	0.000428239	0.000467567	0.000353514	0.000414185	0.000635875	0.000578778	0.000747081	0.00100882	0.000997251	0.00109061
Land	CZE	0.00419259	0.00398887	0.00433728	0.00451373	0.00441136	0.00399903	0.00437084	0.004194	0.00433878	0.00372293	0.00394045	0.00407131	0.00409934	0.00358092	0.00353375	0.00354852	0.00347116	0.00396357	0.00396899	0.00368241	0.00377539
Land	DEU	0.00461266	0.00372655	0.00378347	0.00423239	0.00433146	0.00405529	0.00392837	0.00404467	0.00410917	0.00382161	0.00383498	0.00407876	0.00394118	0.00373382	0.00371626	0.00363328	0.00365258	0.00398225	0.00411788	0.00403769	0.00373151
Land	DNK	0.00576075	0.00541975	0.00486602	0.00422934	0.00561782	0.00492283	0.00517087	0.00523938	0.00552854	0.00534678	0.00417517	0.00509547	0.0051151	0.00407945	0.00368775	0.00381578	0.00375006	0.00369761	0.0040084	0.00410908	0.00402001
Land	EST	0.00754816	0.00693702	0.00607992	0.00644146	0.00580527	0.0051241	0.00598625	0.00563393	0.00520093	0.00504858	0.00377319	0.00266019	0.00266068	0.0035745	0.00257922	0.0037903	0.00343105	0.00427646	0.00501925	0.00276104	0.00487247
Land	ESP	0.00576813	0.00591159	0.00640511	0.00584093	0.00598739	0.00625991	0.00588756	0.00559875	0.00589112	0.00528285	0.00498274	0.00500672	0.00455021	0.00404215	0.00394838	0.0037095	0.00344788	0.00353435	0.00369463	0.00313733	0.00339503
Land	FIN	0.00450178	0.0041369	0.00337784	0.00497798	0.0049553	0.00524274	0.00508352	0.00494408	0.00488766	0.00498419	0.00415052	0.00436543	0.00468645	0.00450582	0.00396006	0.00411904	0.00405183	0.00433724	0.00434404	0.00413636	0.00374665
Land	FRA	0.00489488	0.00480489	0.00487144	0.00487618	0.00464536	0.00460608	0.0045824	0.00449972	0.00415875	0.00410109	0.00394014	0.00385561	0.00382299	0.00369658	0.00350696	0.00345608	0.00375863	0.00365394	0.00364938	0.00349444	0.00346895
Land	GRC	0.0063007	0.00627976	0.00623522	0.00658988	0.0065331	0.00636973	0.00611709	0.00650888	0.00661237	0.00558329	0.00504929	0.00519875	0.00475124	0.00447448	0.00421444	0.00421644	0.00375086	0.00392387	0.00430548	0.00371431	0.00387103
Land	HRV	0.00301215	0.00326496	0.0033859	0.00360127	0.00364844	0.00367731	0.00352859	0.00334343	0.00380109	0.00325176	0.00330163	0.00323932	0.00308249	0.00350468	0.00344031	0.00315416	0.00321042	0.00327202	0.00333584	0.00291619	0.00296536
Land	HUN	0.00478834	0.00423243	0.0043547	0.00413924	0.00500972	0.00503884	0.00374116	0.00373504	0.00391204	0.0033086	0.00239249	0.00340135	0.00300413	0.00300058	0.00304508	0.00262466	0.0029525	0.00262175	0.0028195	0.00260172	0.00256219
Land	IRL	0.0114075	0.0130586	0.0115688	0.0124579	0.0107055	0.0111224	0.0103818	0.0128159	0.0117114	0.010831	0.00817149	0.00730303	0.00544505	0.00673919	0.00856106	0.00636693	0.0104864	0.00897562	0.00920062	0.0120223	0.00599956
Land	ITA	0.00420669	0.00412768	0.00432569	0.00440623	0.00441913	0.00431887	0.0043674	0.0041868	0.00422855	0.00388003	0.00399101	0.00399447	0.00347334	0.00329616	0.0031101	0.0031711	0.00297455	0.00312618	0.00315811	0.00277237	0.00264148
Land	LTU	0.0102271	0.00846965	0.00836558	0.00736993	0.00771536	0.00744993	0.00759879	0.00742382	0.00660441	0.0057078	0.00527699	0.00531766	0.00441923	0.00421013	0.00379189	0.00396267	0.00643789	0.00559475	0.00553188	0.00569651	0.0057501
Land	LUX	0.013543	0.0120888	0.00944841	0.00997278	0.0101558	0.0114148	0.0108337	0.0100382	0.011194	0.011047	0.0106194	0.0132807	0.0135745	0.0176443	0.0153362	0.0123351	0.0135724	0.00990227	0.0103059	0.0165104	0.0126785
Land	LVA	0.00739638	0.00741833	0.00753931	0.00756173	0.00783981	0.0078449	0.00876523	0.00883781	0.00658502	0.00592975	0.00542827	0.00660152	0.00873209	0.00563252	0.00590132	0.0050462	0.00538161	0.00542241	0.00616696	0.00545768	0.00527646
Land	MLT	0.000207754	0.00013833	0.000110194	0.000156384	0.000194068	0.00020223	0.000159222	0.000140588	0.000145366	0.0001197	0.00011142	0.000109737	0.000112657	0.00010364	8.63522e-05	0.000334755	0.000627115	0.000767678	0.00133916	0.00142843	0.00155322
Land	NLD	0.00888559	0.00734012	0.00723666	0.00772718	0.00737508	0.0065893	0.00620286	0.00634956	0.0064501	0.00609084	0.00394526	0.00425737	0.0044261	0.00418784	0.004705	0.006216	0.00511039	0.00544604	0.0053746	0.00517075	0.00469654
Land	POL	0.00463473	0.00470955	0.00420073	0.00411935	0.00398128	0.00407008	0.0040129	0.00400274	0.00421535	0.00373888	0.00387963	0.00393998	0.00368701	0.00334665	0.00329006	0.00320163	0.00331782	0.00327995	0.00341365	0.00316834	0.00295725
Land	PRT	0.0045028	0.00439975	0.00430355	0.00461147	0.004162	0.00398482	0.00385797	0.00396998	0.00425798	0.00401498	0.00401739	0.00385945	0.0033731	0.00330661	0.00339494	0.00341903	0.00298154	0.00303735	0.00322505	0.00293141	0.00282224
Land	ROM	0.00425294	0.00435211	0.00447355	0.0047723	0.00458153	0.00434138	0.00436149	0.00420956	0.00404642	0.00375866	0.00392666	0.00391992	0.00310397	0.00273432	0.00275691	0.00213758	0.00251815	0.00261845	0.00245459	0.00234893	0.00245246
Land	SWE	0.00414904	0.00381913	0.0041185	0.00411491	0.00434723	0.00413127	0.00397935	0.0042401	0.00403661	0.00423562	0.00454452	0.00473301	0.0046581	0.00471051	0.0043186	0.00395804	0.00373379	0.00397463	0.00386069	0.00368276	0.00363311
Land	SVN	0.00443826	0.00400406	0.00414542	0.00434745	0.00448195	0.0041916	0.00394913	0.0041277	0.00445934	0.0040859	0.00397111	0.00398873	0.00444568	0.00401223	0.00318601	0.00314692	0.00263896	0.00269756	0.00275191	0.00266387	0.00277166
Land	SVK	0.00402648	0.00335597	0.0037726	0.00363901	0.00370178	0.00327514	0.00294786	0.00323214	0.00385119	0.00336803	0.00271721	0.00285495	0.00248418	0.00264368	0.00295814	0.00272943	0.00284698	0.00263416	0.00298793	0.00327602	0.00281019
Land	GBR	0.00558506	0.00517237	0.00581074	0.00568116	0.00554697	0.00593128	0.00572134	0.00516195	0.00485583	0.0048133	0.00439772	0.00448379	0.0044812	0.00429124	0.00435083	0.00478812	0.00370063	0.00392733	0.0041172	0.00361936	0.003568
Land	USA	0.00619225	0.00614761	0.0064283	0.00602207	0.00594738	0.00602628	0.00591624	0.00509381	0.00487913	0.00457298	0.00452656	0.00455168	0.00433903	0.00427527	0.00427242	0.00425389	0.00426466	0.00420137	0.00396115	0.00395701	0.00400527
Land	JPN	0.0037953	0.00366076	0.00304095	0.00339231	0.00346177	0.0036485	0.00352112	0.00341451	0.00375095	0.00296723	0.00333391	0.00335814	0.00327938	0.00289449	0.00271869	0.00245388	0.0020991	0.00228599	0.00211212	0.0022109	0.00193317
Land	CHN	0.00153517	0.00154844	0.00147525	0.00150791	0.0015725	0.0015438	0.00147049	0.00154047	0.00156163	0.00162035	0.00164509	0.00172722	0.00175506	0.00183491	0.00190824	0.00198484	0.00199114	0.00196709	0.00206848	0.00220876	0.00225069
Land	CAN	0.00663921	0.0055973	0.00619923	0.00693977	0.00660695	0.00715755	0.00596081	0.00617757	0.00510906	0.00563919	0.00568844	0.00556176	0.00552436	0.00526729	0.00503898	0.00523036	0.00493173	0.00519529	0.00481281	0.00502938	0.00486503
Land	KOR	0.00268703	0.00265506	0.00292857	0.00291299	0.00312629	0.00332774	0.00345261	0.00342286	0.00343005	0.00272649	0.00349843	0.0037506	0.00363021	0.00367093	0.00343747	0.00330938	0.00317212	0.0033405	0.00318485	0.00294988	0.00266999
Land	BRA	0.00600109	0.00548918	0.00553365	0.00537406	0.00471563	0.00481033	0.00465657	0.00450905	0.00452012	0.00448819	0.00443075	0.00440217	0.00420373	0.0041426	0.00405669	0.00389707	0.00415516	0.00401209	0.00369982	0.00352116	0.00314819
Land	IND	0.00121548	0.0011986	0.00116251	0.00117013	0.00113398	0.00111499	0.00111616	0.0010886	0.00096674	0.00100975	0.000963297	0.000918819	0.000871225	0.00080359	0.00086454	0.000894954	0.000941317	0.000922841	0.000885739	0.000887385	0.000862058
Land	MEX	0.00436919	0.00447139	0.00425416	0.00412674	0.00402468	0.00409212	0.00396041	0.00393332	0.00388392	0.00361163	0.00328644	0.00331199	0.00321587	0.00316996	0.00304029	0.00320344	0.00283857	0.00293768	0.00284554	0.0026798	0.00235944
Land	RUS	0.00699671	0.00777891	0.00692657	0.00602487	0.00796191	0.0069015	0.00746112	0.00675443	0.00699834	0.00625087	0.00663369	0.00647298	0.00607648	0.00667673	0.00578835	0.00536895	0.00434557	0.00586183	0.00573198	0.00591851	0.00569668
Land	AUS	0.0172555	0.018966	0.0186679	0.0187569	0.016035	0.0160536	0.0160988	0.0141889	0.0112107	0.0134269	0.00833026	0.0102198	0.0106076	0.00994815	0.00957774	0.00882276	0.00672929	0.0089806	0.0066171	0.00485855	0.00669394
Land	CHE	0.00484233	0.00447978	0.00429598	0.00519582	0.00441481	0.0042514	0.00382634	0.0039882	0.00436055	0.00450096	0.00407193	0.00477614	0.00415183	0.00438538	0.00403704	0.00425605	0.00418449	0.00435264	0.00394946	0.00417814	0.00443315
Land	TUR	0.00391586	0.00355928	0.00376499	0.00379403	0.00326298	0.00332163	0.00335502	0.00347979	0.00365613	0.00291028	0.0035755	0.0036516	0.00347438	0.00340844	0.00333431	0.00327849	0.00286409	0.0030433	0.00291248	0.00250714	0.00248208
Land	TWN	0.00148228	0.00101454	0.00112441	0.00115564	0.0012257	0.00136951	0.00121106	0.00104913	0.00109297	0.000951736	0.00111889	0.000944544	0.000779624	0.000946597	0.000936085	0.000866789	0.000685516	0.000734508	0.000764594	0.000681147	0.000619382
Land	NOR	0.00351042	0.00366417	0.00387356	0.00398786	0.00372486	0.00378774	0.0040588	0.00420386	0.00447525	0.00387345	0.00422901	0.00458207	0.00434413	0.00420176	0.00358669	0.00367679	0.00340988	0.00372001	0.00344516	0.00362146	0.00307788
Land	IDN	0.00079554	0.000811707	0.000813722	0.000887394	0.000918805	0.000874433	0.000936207	0.000921455	0.000968101	0.00087196	0.00108619	0.00112621	0.000990211	0.000974001	0.00106557	0.000999096	0.00094149	0.000938538	0.0010308	0.000907102	0.00084922
Land	ZAF	0.00204002	0.00181118	0.00175473	0.0019247	0.00193456	0.00189982	0.00199748	0.00203883	0.00185963	0.00192505	0.00182706	0.00177548	0.00167697	0.00162124	0.00150978	0.00154225	0.00128795	0.00149217	0.00138896	0.00134197	0.00124634
Land	WWA	0.00228724	0.00207769	0.00220655	0.00207701	0.00204055	0.00199763	0.00189921	0.00191436	0.00198713	0.0021866	0.00215235	0.00185025	0.00204867	0.00206559	0.00190912	0.00189252	0.00227404	0.00186932	0.00204732	0.00189383	0.00199289
Land	WWL	0.00427297	0.00467838	0.00431434	0.00422801	0.00401019	0.00405347	0.00447129	0.00484422	0.00491223	0.00471293	0.00459313	0.00436825	0.00452238	0.00450628	0.004492	0.00402599	0.00365224	0.00355767	0.00294914	0.00286393	0.00311283
Land	WWE	0.00519231	0.0054763	0.0044509	0.0055408	0.00447735	0.00401962	0.00444053	0.00447828	0.00347446	0.00321089	0.00314325	0.00274104	0.00252109	0.00289542	0.00256807	0.00254626	0.0027945	0.00273327	0.00262393	0.00284641	0.00268548
Land	WWF	0.00273854	0.0027682	0.00278778	0.00273453	0.00266402	0.00261525	0.00249921	0.00254914	0.00241349	0.00235218	0.00235412	0.0023841	0.00216289	0.00217437	0.00215154	0.00212844	0.00202745	0.00193343	0.00187704	0.00186195	0.00182716
Land	WWM	0.00198715	0.00199499	0.00205716	0.00202441	0.00191665	0.0022247	0.00224398	0.00243508	0.00282482	0.00338016	0.00321594	0.00320697	0.00352031	0.0031059	0.00332931	0.00328404	0.00295303	0.00304575	0.00306292	0.00310526	0.00288546
Land	Advanced	0.00576381	0.00555967	0.00564287	0.00563776	0.00554026	0.00558476	0.00543658	0.00508832	0.00496925	0.00465897	0.00449931	0.00460058	0.00442666	0.00424234	0.00414473	0.00407442	0.00389997	0.00401655	0.00387005	0.00371699	0.0036489
Land	EmergingDeveloping	0.00229722	0.00229366	0.00223447	0.00219944	0.00218162	0.00214144	0.0021293	0.00215454	0.00214137	0.00216113	0.00215531	0.00210582	0.00209158	0.00209245	0.00207599	0.00205317	0.00204135	0.001992	0.00198091	0.00197214	0.00195682
Land	Global	0.00283398	0.00279609	0.00275548	0.00272178	0.00268875	0.0026582	0.00262277	0.00258988	0.00255882	0.00252764	0.00249699	0.00246713	0.00242704	0.00239919	0.00237087	0.00234101	0.00230578	0.00227976	0.00224917	0.00221968	0.00219665
Nitrogen	AUT	22.5497	24.1472	25.9618	23.59	22.584	21.1845	22.2235	23.1263	24.3862	21.5703	21.9482	24.2167	23.3521	25.0882	28.0825	26.2972	24.9274	38.9108	24.462	37.1764	30.9762
Nitrogen	BEL	31.6424	30.9586	30.7411	33.7538	35.2101	31.8933	33.5801	33.6641	37.0857	35.16	31.2976	25.7383	26.5241	27.5389	29.9777	25.0085	25.8114	28.8175	27.3375	24.9234	24.8099
Nitrogen	BGR	17.0912	20.8561	33.141	37.6078	28.4183	22.5802	17.6742	23.6782	22.2186	29.3658	17.2065	20.3843	19.8179	18.7378	16.778	17.7643	17.0341	18.0462	15.5617	17.1233	18.3298
Nitrogen	CYP	8.55313	7.72091	7.97914	8.87073	8.9287	7.00375	6.85809	6.80341	8.12097	7.77692	8.85968	7.44375	8.5408	6.26431	5.7296	7.41016	7.80028	11.2874	11.0072	16.7179	17.2923
Nitrogen	CZE	23.9464	26.794	18.0828	20.7391	19.6228	18.8157	20.8531	21.3818	21.409	20.1648	19.9725	20.0909	24.1008	21.9235	28.0125	24.2044	22.2462	24.3682	22.3486	21.771	20.6534
Nitrogen	DEU	27.5431	26.7937	25.2797	28.6699	29.2488	27.5695	26.503	29.2764	26.9934	25.3339	26.7247	27.3855	26.391	26.7078	28.6324	26.3103	24.6468	27.1726	24.8448	27.3176	24.5188
Nitrogen	DNK	47.0235	42.1518	33.1213	29.6059	36.6234	30.8114	30.1321	34.299	32.266	29.0946	24.8273	32.0513	33.5671	28.6716	34.2408	33.1817	30.2414	37.5938	30.7993	33.5629	36.9969
Nitrogen	EST	16.1662	15.1317	14.4665	19.0041	19.6801	15.6248	18.7361	15.7223	22.7152	15.1513	12.6529	12.8547	13.7463	16.9707	16.6306	20.218	16.0128	20.6807	22.8715	17.1197	32.6757
Nitrogen	ESP	30.3494	32.1126	31.8026	34.3611	33.1328	30.2035	29.9932	30.7989	25.7625	23.9919	26.3608	24.6294	22.5974	22.379	25.403	24.3878	21.8188	23.8457	23.9468	21.4452	23.255
Nitrogen	FIN	32.829	30.2873	28.301	34.2855	33.8112	32.5911	33.1127	33.1855	33.6875	32.7101	30.632	30.247	30.6585	31.6251	30.5591	30.0445	28.3786	29.7575	28.8345	29.4002	31.6516
Nitrogen	FRA	33.1332	34.8767	32.2589	33.5864	33.2153	31.8888	32.4201	33.8658	27.151	24.9536	25.0534	24.4379	32.6569	25.8971	25.6525	25.6605	26.5068	27.4521	24.0717	23.0136	23.065
Nitrogen	GRC	31.9293	29.48	28.044	30.3829	31.8104	27.8669	26.291	30.0827	28.2821	24.5694	25.8382	24.2083	21.6013	23.0607	19.8131	18.3736	17.3003	19.2852	20.4929	19.552	20.8939
Nitrogen	HRV	3.07138	2.91497	3.29318	4.33404	3.9938	4.01076	39.3866	40.7987	52.6964	19.8694	23.9441	27.4917	20.9013	16.6595	15.7535	17.213	14.3257	18.8539	18.8617	18.633	20.2231
Nitrogen	HUN	28.0569	25.5377	24.9524	21.9226	25.9393	23.2736	20.2474	23.385	23.3465	17.8093	14.7701	19.9247	18.0849	21.9067	21.0195	18.6764	22.3857	22.4319	22.6002	21.6027	23.5248
Nitrogen	IRL	71.1904	76.6666	84.9421	86.3811	66.3914	64.4925	62.3884	71.3943	60.4302	67.8301	50.5834	42.6233	35.5346	43.329	56.556	43.7242	55.0838	58.8361	60.0107	69.3625	47.4764
Nitrogen	ITA	21.9472	21.7382	23.5952	24.9353	25.6336	23.7452	25.6223	25.3676	22.1579	18.9801	19.0931	19.368	18.6411	17.9765	18.2479	18.7135	17.7278	19.6443	19.196	17.3475	16.8877
Nitrogen	LTU	27.2603	28.0668	32.3825	32.2134	33.1809	30.6952	31.7814	27.1089	29.2234	24.3553	22.2233	23.7238	31.8302	25.7584	27.5998	27.6441	46.6849	33.7963	31.1901	37.0114	41.9543
Nitrogen	LUX	67.8437	70.0852	55.5704	69.7614	75.7078	73.6729	72.5587	67.4082	72.5109	65.1631	64.7505	69.6277	67.6412	87.9578	92.3686	80.2152	77.1329	75.6583	63.461	83.2003	93.5823
Nitrogen	LVA	12.338	13.4559	11.8981	16.5502	16.4228	19.5057	21.7569	19.9426	18.4655	17.0903	16.8765	19.5933	21.643	24.3607	25.7826	20.9059	10.3391	24.3216	22.4959	25.2031	10.9692
Nitrogen	MLT	5.74632	2.57481	2.03922	2.00585	2.14244	2.28983	2.23052	1.96834	1.30072	1.28097	1.55687	1.36601	1.5701	1.50063	1.40391	2.87267	5.26748	7.09755	11.1124	24.022	15.128
Nitrogen	NLD	38.0208	38.679	38.1525	39.0925	39.2885	34.331	34.0224	36.5471	33.2463	32.2992	23.2975	23.9028	25.636	24.2283	27.2067	36.6443	25.4751	30.1	27.4793	27.5116	28.1588
Nitrogen	POL	22.7375	22.7742	20.8881	22.1062	21.4991	24.543	25.4177	28.2906	27.688	24.2672	27.272	26.9053	7.50859	24.783	7.18498	23.398	8.14336	13.8829	20.6768	13.4138	14.3964
Nitrogen	PRT	18.0039	17.6147	18.8363	19.5946	17.141	15.8261	15.7157	19.003	18.2971	17.1227	18.2388	16.7463	15.3767	15.8904	18.4949	17.3504	14.873	15.9933	15.9896	15.9394	15.8221
Nitrogen	ROM	11.2512	12.5036	11.4899	12.7614	14.0266	14.9717	13.1982	14.9488	15.0395	15.3588	14.9443	16.1395	12.3387	4.11965	14.1504	13.6899	12.9372	15.2599	15.971	15.9846	17.85
Nitrogen	SWE	27.2339	26.412	26.2583	27.1376	26.853	24.7359	25.1225	27.4181	27.9443	24.4571	28.1898	28.453	26.3906	28.422	28.8486	28.7776	26.5023	29.0794	26.218	25.9172	27.6862
Nitrogen	SVN	24.8752	23.2772	22.5687	24.2434	22.772	20.5005	20.9011	21.8362	20.8506	19.9736	19.9627	20.1233	17.9948	19.0955	18.9747	18.1556	13.9114	16.3246	14.9779	17.2962	18.8383
Nitrogen	SVK	16.7631	14.5039	16.039	15.2494	15.6292	14.4098	14.7948	15.6582	17.0678	16.9343	15.3963	15.4359	13.8481	17.7774	21.6351	17.5957	16.9819	11.4431	30.7753	32.4722	34.7328
Nitrogen	GBR	31.4066	33.6572	33.6995	33.2841	34.2993	34.1586	33.3232	32.0983	29.8201	27.7752	26.3825	26.4461	27.2679	26.4992	29.9827	31.6937	25.015	27.2222	26.4915	25.7979	23.9884
Nitrogen	USA	37.274	38.2175	40.4888	41.4214	38.4716	37.7053	40.2215	36.6715	32.2025	33.0249	34.0271	35.5996	35.8212	35.5412	36.5858	35.9997	32.7772	32.8801	31.762	32.5614	32.7687
Nitrogen	JPN	17.4216	18.3675	16.6854	17.944	17.6787	18.2562	18.2557	18.92	18.4501	16.3156	17.2697	19.0372	20.6419	20.2712	43.2338	33.2004	12.3057	13.8598	12.9921	13.6876	15.9917
Nitrogen	CHN	15.4934	15.7072	17.1318	17.2478	18.6516	18.7856	19.0156	19.0187	19.8485	20.5236	20.942	21.8424	21.6573	21.2786	16.9665	17.3541	22.2135	21.9521	21.239	20.2327	19.5203
Nitrogen	CAN	32.5983	32.415	35.2206	39.4309	35.3306	39.8985	32.6917	43.9674	38.0916	40.1326	43.338	47.7569	51.1912	47.1912	46.0686	45.1699	39.7965	40.5069	41.4775	40.3643	43.5919
Nitrogen	KOR	18.3056	19.3257	24.1497	22.6493	22.2251	23.7633	22.8183	28.5546	22.8079	17.7148	20.1453	23.5291	26.2921	29.1685	46.7631	39.2135	18.187	20.2723	20.2667	19.665	22.3402
Nitrogen	BRA	9.62801	9.01552	10.4949	12.267	12.1437	10.5029	11.2418	14.0785	12.9997	11.1447	14.2257	16.7848	14.2495	16.6731	19.0516	13.5973	14.4504	17.0691	16.4253	16.9692	18.3215
Nitrogen	IND	10.131	10.4076	9.41417	9.87598	10.1638	10.8576	11.5721	11.9025	11.7666	12.3769	12.8211	13.1486	12.4383	12.091	12.589	12.9836	12.3766	12.6169	12.6773	13.3995	14.3058
Nitrogen	MEX	16.0072	17.2928	14.4291	14.0699	12.09	14.5756	13.4148	14.2233	12.1703	12.2406	11.5822	14.0513	14.4214	14.592	14.4489	12.6948	13.5115	13.5426	12.3056	11.2279	11.606
Nitrogen	RUS	7.36109	7.71438	5.40977	5.67961	8.26743	7.31009	8.96225	9.51562	10.7802	9.9082	11.4369	11.8365	11.8032	13.6704	12.0409	10.007	9.80313	10.9703	10.0346	11.2813	11.5148
Nitrogen	AUS	31.4514	36.9512	34.7295	40.4832	37.1541	33.925	34.1967	35.3202	27.6036	30.3216	29.7706	33.6526	32.2637	33.9298	37.3981	38.3613	28.6612	32.2338	26.4279	26.1218	34.4396
Nitrogen	CHE	19.5184	20.6088	19.4837	20.657	19.2164	19.1126	18.5923	18.8842	20.8068	21.4304	21.5024	25.0581	24.0376	24.5878	24.3492	25.5104	21.3404	24.9132	19.8114	22.158	24.6757
Nitrogen	TUR	20.0094	16.1077	17.9725	19.0213	18.0474	18.6726	19.2098	18.909	16.7194	18.0469	20.875	18.806	19.7437	20.2919	19.5786	18.6006	21.4897	20.711	17.0653	18.7218	22.9661
Nitrogen	TWN	64.4895	28.1777	18.4518	12.2673	9.54882	8.97709	8.21147	7.61972	7.15936	6.74835	8.69175	7.29653	6.52373	8.00587	7.7943	7.51681	5.65212	6.09215	5.65372	6.05282	5.68954
Nitrogen	NOR	29.4066	31.6911	34.0791	35.0201	29.1281	29.7695	32.7823	33.9995	35.5284	30.6037	30.228	34.012	31.7725	34.3141	32.127	34.4751	27.5	31.2952	27.2691	32.2584	30.2655
Nitrogen	IDN	7.07791	6.80123	7.14499	7.6013	8.22733	8.19486	8.79913	8.84394	9.33398	9.36246	9.98867	10.6612	10.4352	9.79963	10.3824	9.95327	10.0157	9.67603	11.1373	9.87551	11.5874
Nitrogen	ZAF	9.21158	7.36384	8.6773	8.85961	8.82407	7.08637	8.64236	9.72693	7.9845	7.71881	7.35904	7.23869	7.97726	7.46876	6.76429	6.433	5.41153	7.71638	7.5325	8.16099	8.5389
Nitrogen	WWA	8.46097	7.79775	8.6049	8.58451	8.7373	8.68703	7.55064	7.89982	7.84192	10.2383	9.9984	8.95096	9.57045	10.2871	10.3036	11.1046	11.5047	9.87971	10.8062	9.30401	11.1519
Nitrogen	WWL	7.34843	7.74907	7.07839	7.24582	7.45778	6.83599	8.07602	9.25902	9.28383	8.29794	9.33364	9.41508	9.66224	9.86465	10.8981	9.78223	8.91097	9.56715	8.73821	8.56501	10.0598
Nitrogen	WWE	7.89624	8.93703	7.45182	10.0233	8.73591	8.61191	13.2057	14.8738	13.8486	12.7632	12.1416	12.7261	12.6697	15.5375	11.8915	12.4258	13.4689	13.2905	13.0412	13.7151	14.9469
Nitrogen	WWF	1.90143	1.89746	2.55051	2.27206	2.40392	2.36438	2.44882	2.51417	2.4698	2.40226	2.99748	2.94621	2.90945	3.03075	3.17433	3.0176	3.10666	3.41205	3.08336	3.15839	3.54032
Nitrogen	WWM	11.8981	12.7766	11.9272	10.4252	10.6381	10.9116	12.6995	13.0761	14.215	14.1531	13.866	14.1752	15.2654	15.46	16.5551	14.9045	15.1351	14.4818	13.8958	14.7094	15.3833
Nitrogen	Advanced	31.8648	31.8373	32.0301	33.2655	31.9921	31.2905	31.8853	32.2601	29.0087	27.7379	28.3559	29.5234	29.5667	29.6163	33.9385	32.4682	25.7835	27.3775	26.3195	26.406	26.9726
Nitrogen	EmergingDeveloping	9.84322	9.85147	10.0706	10.2019	10.6535	10.7311	11.0461	11.381	11.4761	11.9442	12.3647	12.6086	12.4722	12.5696	11.8391	11.6739	12.7496	12.647	12.4569	12.2045	12.8723
Nitrogen	Global	13.253	13.2337	13.4274	13.7056	13.8755	13.8166	14.1555	14.4792	14.0643	14.2616	14.6957	15.0583	14.928	15.0017	14.9892	14.6352	14.6039	14.7408	14.4254	14.2193	14.8708
Phosphorus	AUT	4.08494	4.17216	4.09675	4.10757	3.67163	3.31776	3.32209	3.40772	3.25303	2.38086	2.77828	2.99506	2.99549	3.14926	3.24897	3.23642	3.0821	3.36276	3.0255	2.89491	3.08344
Phosphorus	BEL	4.00403	4.02057	3.85908	4.17727	4.56598	3.89477	4.30926	3.95713	3.11694	3.12454	3.15958	2.57683	2.93916	2.926	2.85637	2.48019	2.3731	2.78487	2.57911	2.51733	2.68187
Phosphorus	BGR	0.44083	1.57453	4.83233	9.01534	1.60909	2.32742	4.05164	5.82501	6.17185	2.72573	1.63637	2.55917	2.71099	2.96919	2.88443	3.31955	3.67663	3.20038	3.60012	3.9856	4.33398
Phosphorus	CYP	2.07369	2.25771	2.54505	2.87473	2.46587	2.18708	2.16319	2.08956	1.3023	2.30387	2.3422	1.24028	2.04152	1.68998	1.43145	1.71181	1.8398	2.66275	2.37067	3.34644	3.89743
Phosphorus	CZE	2.14917	2.54898	1.93138	2.22065	2.13551	2.1241	2.52347	2.54453	1.98164	1.87714	2.02651	2.24297	2.18815	2.10771	2.05373	2.21984	1.90832	2.53246	2.23962	2.40897	2.37805
Phosphorus	DEU	3.35108	2.82513	2.86584	2.94783	3.2528	2.88976	2.86961	3.07204	2.18719	2.33904	2.7359	2.57588	2.81467	2.74048	2.86875	2.76872	2.51812	2.69918	2.38435	2.6343	2.41146
Phosphorus	DNK	4.08126	4.08386	3.29878	3.19385	4.7009	4.00961	3.43993	4.1333	3.06614	2.56888	2.91158	3.47244	3.38788	3.44877	3.06869	3.53413	3.00826	3.63897	3.05987	3.30533	3.42309
Phosphorus	EST	1.89315	1.46478	1.65675	2.38099	2.75381	2.40122	3.09822	2.14969	3.04538	1.58127	1.57631	2.02556	2.13219	2.77507	2.49227	2.64039	2.0391	3.42335	2.92543	2.82298	4.17595
Phosphorus	ESP	6.42833	6.74291	6.80041	6.90222	6.92221	5.94649	5.4065	6.37432	3.58208	3.12886	3.80946	3.86093	3.8471	3.98274	3.74138	3.6788	3.63622	3.64434	3.61885	3.77498	3.94315
Phosphorus	FIN	4.85758	3.8882	4.251	4.88509	4.7373	4.31425	4.43374	4.35806	3.09462	3.61425	3.04006	3.12429	3.32892	3.33907	3.41439	3.20785	2.75416	3.35234	3.04739	3.15155	2.89224
Phosphorus	FRA	5.76186	5.36724	4.99416	5.07478	4.94601	4.44477	4.32901	4.52688	2.54857	1.81766	2.39553	2.20886	3.17953	3.30371	3.09756	3.0025	2.82046	3.04819	2.80699	2.76423	2.91724
Phosphorus	GRC	5.55504	5.60547	4.78678	5.52032	5.1063	4.51409	4.39525	4.29122	3.69176	3.1521	3.66925	3.10269	3.02092	3.16063	2.71981	2.54883	2.3922	2.67563	2.92546	2.85774	3.01218
Phosphorus	HRV	0.590896	0.633226	0.639204	0.781771	0.813063	0.759305	7.7108	6.80287	8.42249	4.24309	8.79397	8.16025	3.16776	3.23149	3.81382	2.9878	1.53354	3.63178	3.55367	3.70789	4.07953
Phosphorus	HUN	2.13125	2.56771	2.87612	2.88848	3.36053	2.71654	2.96033	3.4751	2.48304	1.66583	1.63195	1.80819	2.06073	2.68929	2.5325	2.53041	2.78865	3.74303	3.2341	3.30059	3.45462
Phosphorus	IRL	9.27273	10.9217	11.8104	10.8985	8.92156	8.37429	7.74502	8.68686	5.86454	6.91946	5.823	4.66366	4.05278	5.36067	5.1571	4.64405	5.54179	6.62241	5.80594	7.79778	4.64982
Phosphorus	ITA	4.81052	3.82428	3.64121	3.77029	3.9686	3.51792	3.65161	3.66997	2.66104	2.30512	2.63533	2.62838	2.57214	2.4057	2.32225	2.33399	2.24587	2.45984	2.30739	2.23854	2.5254
Phosphorus	LTU	2.47007	2.41313	3.68356	3.85592	4.08554	3.9052	4.64393	3.18957	2.81924	2.57009	2.24807	2.50391	3.8063	3.79099	4.6055	5.12818	5.35112	5.36491	5.16285	5.66491	6.25962
Phosphorus	LUX	8.85107	9.10479	6.33647	7.68908	8.71605	8.31538	8.20868	6.79325	5.85581	5.18194	6.54163	6.63678	6.79928	9.28352	9.02952	7.64794	6.21399	7.06974	6.07385	7.58447	8.60456
Phosphorus	LVA	1.95523	2.43402	1.58348	1.89999	3.42535	3.20466	3.35475	2.73498	2.32187	1.80679	2.23016	2.42645	3.56087	4.49597	4.21773	4.36694	3.78732	4.91158	4.50431	4.9	5.42373
Phosphorus	MLT	0.862724	0.43731	0.250062	0.325986	0.465112	0.309337	0.258315	0.259796	0.177163	0.0738078	0.135586	0.192332	0.139784	0.141849	0.10935	0.358783	0.991557	1.72566	1.73538	5.36974	3.63846
Phosphorus	NLD	5.00306	4.56803	4.57646	4.88785	5.77591	4.44852	4.33844	4.67472	3.21244	2.99835	2.7289	2.78032	3.06086	2.99014	3.03185	3.51839	3.02017	3.63879	3.24355	3.27365	3.26139
Phosphorus	POL	3.54046	3.64532	3.30616	3.53038	3.4701	4.66578	4.3083	4.89224	3.99228	3.65745	4.41285	3.91177	3.96977	3.4922	3.09282	3.27328	3.51794	3.41578	3.23704	3.40425	2.97442
Phosphorus	PRT	3.91482	4.04717	3.87895	3.92756	3.61311	3.15821	3.27366	4.08032	2.6861	2.0735	2.80706	2.12416	2.13735	2.39645	2.39326	2.676	2.2895	2.43631	2.29334	2.39089	2.46516
Phosphorus	ROM	1.21515	1.73376	1.5494	2.03057	2.07164	2.94925	2.21615	2.52965	2.42732	2.37408	2.82075	3.00457	2.51092	2.16017	2.58161	2.92353	2.6406	3.06029	3.8044	4.13817	3.98239
Phosphorus	SWE	3.73462	3.49386	3.30784	3.68012	3.62702	3.31275	3.10637	3.17168	2.93156	1.98642	2.86708	2.91476	3.02767	3.25905	2.99173	3.01986	2.74853	3.19581	2.73035	2.94751	3.14553
Phosphorus	SVN	5.2289	4.91805	4.2441	4.5401	4.41934	3.7862	3.81033	3.82967	3.53608	2.52675	3.06706	2.9213	2.47983	3.09333	2.84835	2.88968	1.95002	2.54547	2.12859	2.3989	2.73059
Phosphorus	SVK	1.94198	1.98136	1.78999	1.77091	1.80166	1.86045	2.09259	2.05816	1.8032	1.75501	1.68622	1.95133	2.00162	2.30571	2.53111	2.35202	2.09095	2.3695	2.69704	3.18548	2.88023
Phosphorus	GBR	4.49718	4.29034	4.45495	4.51584	4.79641	4.95077	4.63026	3.98952	3.31976	2.62318	2.99361	2.78846	3.32642	3.09315	3.13469	3.34937	2.97258	2.97721	2.64202	2.66175	2.43915
Phosphorus	USA	6.67518	7.07479	6.84976	7.22481	7.47537	7.15747	7.20725	6.37452	4.91941	5.81459	6.06959	5.91676	6.30207	6.21167	5.85086	6.05412	5.83698	5.79548	5.49657	5.54622	5.76095
Phosphorus	JPN	4.43944	4.17349	3.63961	3.90604	3.57528	3.58962	3.70607	3.6261	2.88534	2.68429	3.34196	3.38015	3.58927	3.2859	3.24614	2.88869	2.48263	2.90091	2.59212	2.72488	2.53641
Phosphorus	CHN	2.52193	2.81787	3.1888	2.96473	3.39461	3.57429	3.63496	3.11168	3.25589	3.89586	4.27377	4.26055	4.23057	4.28068	4.20525	4.07563	3.97322	3.90528	3.85164	3.7294	3.9341
Phosphorus	CAN	5.37143	5.1686	5.54803	7.32299	5.977	6.47716	6.06168	7.09996	6.45667	5.91715	6.87347	8.357	8.29299	8.78262	8.2865	8.65	8.0928	8.99112	9.20707	8.3249	9.29246
Phosphorus	KOR	3.5311	3.26754	3.91437	3.81832	3.25426	3.43317	3.47689	4.09352	2.75825	2.76055	3.46922	3.8571	4.04639	4.00795	3.71582	3.51239	3.27512	3.77626	3.75457	3.77557	3.10857
Phosphorus	BRA	5.62201	5.66057	6.12278	6.99414	7.65716	5.80413	5.94149	7.61821	6.65645	4.78239	5.78704	7.08698	6.35742	7.60113	7.69117	6.00781	6.15904	6.71992	6.47356	5.91312	7.29211
Phosphorus	IND	1.5458	1.47613	1.30289	1.45809	1.54266	1.69428	1.78484	1.61089	1.91705	2.19906	2.47468	2.38624	1.90229	1.64112	1.67742	1.90265	1.82002	1.94213	1.90359	2.0817	2.31394
Phosphorus	MEX	2.0321	2.02066	2.00256	1.86279	1.88542	1.94794	1.90516	1.61307	1.10452	1.40238	1.41354	1.35266	1.41091	1.53541	1.71544	1.87163	1.79639	1.65966	1.76213	1.87928	1.28484
Phosphorus	RUS	0.90013	0.923452	0.950691	1.01989	1.29595	1.40704	1.69402	1.7548	1.81371	1.63727	2.18757	2.3024	2.3736	2.43218	2.3172	1.83307	1.80227	2.06267	1.98379	2.03243	2.09367
Phosphorus	AUS	7.41468	9.85804	12.4657	14.8188	15.8627	15.8177	15.09	15.3172	11.7565	10.1185	11.7435	12.444	12.6574	11.3275	11.8412	12.741	11.3752	13.5708	10.9377	10.779	11.7749
Phosphorus	CHE	3.07406	3.19521	3.046	3.00929	2.99723	2.7772	2.77551	2.71729	2.48673	2.57001	2.95201	3.41182	3.27603	3.64218	3.30134	3.31893	3.04248	3.43803	2.62159	3.08034	3.44555
Phosphorus	TUR	3.41452	2.61133	2.87283	3.27891	3.17094	3.2584	3.36106	2.9008	1.95711	3.01189	3.45839	3.00799	2.77698	3.1194	2.83408	2.93697	3.86567	3.69216	2.87516	3.02674	3.53344
Phosphorus	TWN	11.5668	6.01025	3.61805	2.56677	2.03989	1.79886	1.8118	1.53038	1.24054	1.1657	1.9096	1.47417	1.56465	1.836	1.77988	1.60437	1.2909	1.4744	1.37164	1.2483	1.17922
Phosphorus	NOR	4.50672	4.7929	4.7489	4.93514	4.36529	4.2125	4.53613	4.43833	3.8955	3.55534	3.83109	3.7065	3.96985	4.2824	3.68115	3.87257	3.32603	3.99809	3.17274	3.59847	3.60447
Phosphorus	IDN	0.259131	0.243568	0.27895	0.58283	0.54255	0.430979	0.701952	0.701991	0.637914	0.829805	0.937099	1.07857	2.19803	1.66444	2.14065	2.32661	2.14246	2.56558	2.43955	1.29991	1.13444
Phosphorus	ZAF	1.79207	2.16282	1.91879	1.93699	2.11368	1.38318	1.75055	1.40575	1.35118	1.45996	1.59255	1.60505	1.71286	2.23834	1.97094	1.94449	1.63011	2.04198	2.22663	2.32188	2.04997
Phosphorus	WWA	1.56192	1.4342	1.53884	1.4641	1.51965	1.61022	1.51173	1.67518	1.25911	1.59332	1.62194	1.61276	1.5607	1.72	1.76363	1.62739	2.01769	1.67176	1.96597	1.54237	1.9633
Phosphorus	WWL	1.59877	1.85374	1.48426	1.6636	1.80909	1.82769	2.24678	2.78312	2.00108	1.63535	2.53722	2.65126	2.73657	2.90455	2.7958	2.33152	2.11267	2.16735	1.96626	1.80797	2.24397
Phosphorus	WWE	0.823748	0.811016	0.753713	1.04707	1.15561	1.39013	2.14821	2.40714	2.16497	2.00194	1.94171	2.24497	2.21726	2.32815	1.83966	1.83221	1.86281	2.00846	1.98238	1.90997	2.32551
Phosphorus	WWF	0.413152	0.403041	0.481814	0.44483	0.401121	0.374543	0.419489	0.480605	0.367681	0.42151	0.504671	0.505301	0.587186	0.550767	0.538877	0.553269	0.536333	0.585509	0.481139	0.547409	0.549657
Phosphorus	WWM	2.06637	2.01239	1.89556	1.69219	1.87113	1.95787	2.29222	2.58142	1.88225	2.23382	2.35496	2.50987	2.02747	2.25375	2.29545	2.28001	1.96963	2.24903	1.97622	2.23286	2.67999
Phosphorus	Advanced	5.5565	5.44209	5.31614	5.65192	5.6167	5.42886	5.41829	5.30213	4.04604	4.02633	4.52838	4.51059	4.78378	4.70681	4.52493	4.57219	4.28457	4.53857	4.24017	4.30126	4.35588
Phosphorus	EmergingDeveloping	1.72607	1.76547	1.8382	1.84563	2.0093	2.02786	2.12037	2.07727	1.95867	2.17423	2.43371	2.46597	2.36002	2.38099	2.38356	2.3039	2.29748	2.3214	2.28303	2.18421	2.42039
Phosphorus	Global	2.31917	2.33107	2.36984	2.42386	2.55399	2.53826	2.61244	2.5558	2.26681	2.44598	2.73904	2.76209	2.70822	2.71283	2.68879	2.62692	2.58019	2.63655	2.56095	2.48456	2.69471
Water	AUT	0.00026918	0.000273223	0.000249604	0.000225882	0.000261826	0.000258671	0.000253403	0.000242237	0.000229809	0.00022373	0.000173838	0.000178915	0.00018599	0.000157489	0.000174556	0.000155817	0.00015175	0.000162227	0.000159074	0.000172125	0.000152586
Water	BEL	0.000580863	0.00054704	0.00046824	0.000555489	0.000559711	0.000508562	0.00053345	0.000513662	0.000612411	0.00068396	0.000319891	0.000288764	0.000315882	0.000287213	0.000314165	0.000246789	0.000274254	0.000282823	0.000256581	0.000227917	0.000219485
Water	BGR	0.00012196	9.51551e-05	8.20194e-05	0.000112476	0.000114593	0.000108418	0.000106805	0.000107819	0.000135885	0.000124768	7.53283e-05	7.65959e-05	9.14782e-05	6.39019e-05	6.94916e-05	7.11458e-05	7.15628e-05	7.39076e-05	6.12324e-05	7.31628e-05	7.09834e-05
Water	CYP	0.000487461	0.000408116	0.000359063	0.000344847	0.000411233	0.000352103	0.000352866	0.000335988	0.000561914	0.000363633	0.00029421	0.000283432	0.000277797	0.000254437	0.000255369	0.000240886	0.000287779	0.000233583	0.000269004	0.000230818	0.00022417
Water	CZE	0.000124009	0.000142	0.000161002	0.000139501	0.000185699	0.000180491	0.0001443	0.000169959	0.000164884	0.000130457	0.00010151	0.000109358	0.000109403	8.6222e-05	8.57582e-05	7.93938e-05	7.75971e-05	8.74375e-05	7.40134e-05	8.07663e-05	7.35269e-05
Water	DEU	0.000235985	0.000249301	0.000209183	0.000252375	0.000252088	0.000258522	0.000293049	0.000290817	0.000286324	0.000266719	0.000220981	0.000231328	0.00024991	0.000198625	0.000198336	0.000192308	0.000171186	0.000192097	0.000176598	0.000197361	0.00019825
Water	DNK	0.000226848	0.000237112	0.000204116	0.000214637	0.000218233	0.000237424	0.00026423	0.000254231	0.000293184	0.000277346	0.000175032	0.000234797	0.000236323	0.00018826	0.000201529	0.000177079	0.000175929	0.000165384	0.000165585	0.000202317	0.000182184
Water	EST	2.00347e-05	5.28391e-05	7.4348e-05	9.07844e-05	0.000124762	0.000124001	0.000177285	0.000159647	0.000169548	0.000125164	6.39809e-05	8.64894e-05	9.66787e-05	9.71138e-05	9.60711e-05	8.92624e-05	8.38606e-05	8.6674e-05	9.73853e-05	0.00010043	9.09413e-05
Water	ESP	0.000665208	0.00068344	0.000658012	0.000756233	0.000717349	0.000807798	0.000674784	0.000609149	0.000606622	0.000647514	0.000495826	0.000496048	0.000514178	0.000394563	0.000401438	0.00039769	0.000356735	0.000376424	0.00035322	0.000335372	0.000444217
Water	FIN	0.000248741	0.000258771	0.00022009	0.000271273	0.000299298	0.000288655	0.000315813	0.000290775	0.000289638	0.000306651	0.000227109	0.000200789	0.000251788	0.000218123	0.000206299	0.00018501	0.000181071	0.000192209	0.000178741	0.000179216	0.000169324
Water	FRA	0.000310711	0.00031015	0.000267292	0.000315313	0.000328343	0.000316619	0.00030211	0.000294907	0.00027604	0.000222582	0.000180279	0.000191752	0.000227567	0.000199921	0.00020104	0.000189873	0.000181903	0.000191508	0.000173058	0.00018781	0.000178349
Water	GRC	0.00081902	0.000736432	0.00057763	0.000675071	0.000786329	0.000667608	0.000682058	0.0007373	0.000853936	0.000676207	0.000494634	0.000524176	0.000526161	0.000433084	0.000327507	0.000314693	0.000332314	0.000338356	0.0002942	0.000324632	0.000333636
Water	HRV	5.64894e-05	6.47497e-05	6.30513e-05	7.3539e-05	8.12464e-05	8.0892e-05	8.57605e-05	8.1116e-05	0.000120078	9.03247e-05	5.91026e-05	4.8695e-05	4.80168e-05	4.27718e-05	4.41735e-05	3.95812e-05	3.86309e-05	3.89757e-05	4.35953e-05	5.86166e-05	4.09742e-05
Water	HUN	7.12388e-05	7.16661e-05	7.80639e-05	8.67965e-05	8.2658e-05	7.3706e-05	7.67233e-05	7.68138e-05	8.77166e-05	7.27832e-05	4.58243e-05	4.7675e-05	4.60864e-05	4.30885e-05	4.43981e-05	3.8963e-05	4.31407e-05	5.01503e-05	4.07198e-05	4.0739e-05	4.01347e-05
Water	IRL	0.000311091	0.000327693	0.000260065	0.000299606	0.000306098	0.00034194	0.000402776	0.000374104	0.000374267	0.000351023	0.000155262	0.000149643	0.000147114	0.000145899	0.000166468	0.000211622	0.00023433	0.000276769	0.000229347	0.000336132	0.000228831
Water	ITA	0.000371123	0.000363106	0.0003368	0.000381908	0.000347538	0.000353418	0.00039263	0.000362352	0.000331167	0.000350029	0.00028585	0.000278416	0.00026067	0.000227276	0.000198537	0.000218223	0.00020349	0.000268798	0.000211493	0.000197958	0.000191277
Water	LTU	6.20279e-06	1.42754e-05	4.39107e-05	5.07063e-05	7.91693e-05	0.000108642	0.000136192	0.000140006	0.00016727	0.000115847	5.34648e-05	6.07696e-05	0.000162308	8.59585e-05	0.000177849	7.81921e-05	7.2429e-05	6.25027e-05	7.60461e-05	9.16709e-05	8.32712e-05
Water	LUX	0.00162439	0.00142441	0.00121331	0.00137988	0.0015935	0.00146264	0.00149933	0.00143872	0.00163614	0.00175143	0.000871869	0.000801945	0.00089668	0.000878834	0.00100716	0.000726957	0.000852716	0.000642063	0.000392938	0.000774097	0.000722388
Water	LVA	3.52453e-06	1.50439e-05	1.06777e-05	2.50641e-05	4.54867e-05	8.85421e-05	0.000248712	0.000552831	0.000404756	0.000113311	5.5909e-05	7.69914e-05	0.000228081	8.99037e-05	0.000224381	0.000235011	0.000525879	0.000781919	0.000514335	0.00059209	0.000910254
Water	MLT	1.60833e-05	1.21496e-05	1.10428e-05	1.42983e-05	1.71377e-05	1.86155e-05	1.748e-05	1.88704e-05	1.48694e-05	1.30795e-05	1.25086e-05	1.05179e-05	1.07117e-05	1.65616e-05	1.53547e-05	3.31544e-05	7.12611e-05	8.01703e-05	0.000137541	0.000156647	0.000128757
Water	NLD	0.000513863	0.000534607	0.000485089	0.000620656	0.000509504	0.000523169	0.0005533	0.000594992	0.000511485	0.000580919	0.000241365	0.000244331	0.000317123	0.000246517	0.000283972	0.000317782	0.000235941	0.000305608	0.000269535	0.000267981	0.000292088
Water	POL	6.88182e-05	7.52749e-05	7.16027e-05	6.93185e-05	7.80437e-05	6.82898e-05	5.85845e-05	6.82271e-05	7.56017e-05	6.15147e-05	6.15616e-05	5.7614e-05	6.56232e-05	5.58384e-05	6.71797e-05	8.51217e-05	5.72757e-05	6.55438e-05	6.08253e-05	6.64525e-05	6.17839e-05
Water	PRT	0.00041259	0.000392821	0.000375551	0.000378126	0.000322545	0.000331306	0.000301953	0.000310615	0.00032239	0.000287314	0.000272477	0.0002458	0.00025735	0.000244055	0.000219763	0.00024469	0.000225323	0.000237696	0.000198593	0.000227466	0.000208903
Water	ROM	7.02454e-05	7.39766e-05	6.39664e-05	7.73458e-05	8.46825e-05	6.03494e-05	7.18165e-05	8.35234e-05	9.62298e-05	7.67217e-05	6.75716e-05	6.12824e-05	5.60299e-05	4.8773e-05	6.81842e-05	5.28987e-05	4.56053e-05	5.83254e-05	5.71776e-05	6.57162e-05	6.10981e-05
Water	SWE	0.000216323	0.000220332	0.000198492	0.000210312	0.000200114	0.000203649	0.00023284	0.000223373	0.000221685	0.00023057	0.000225312	0.000212748	0.000244056	0.000241477	0.000238889	0.000174827	0.000171565	0.000208505	0.000168723	0.000171374	0.000162069
Water	SVN	0.000212984	0.000236635	0.000214591	0.000223825	0.000292623	0.000260162	0.000251642	0.000233922	0.000275964	0.000311564	0.000297131	0.000279144	0.000342519	0.000282704	0.000218158	0.000227155	0.000227055	0.000217837	0.000197603	0.000215134	0.0003318
Water	SVK	6.16476e-05	8.78324e-05	9.34205e-05	0.000114675	0.000142822	0.000118467	0.000102223	9.76052e-05	9.7871e-05	9.23856e-05	7.96717e-05	7.31436e-05	7.74071e-05	7.07182e-05	7.99929e-05	8.69515e-05	7.25379e-05	7.04852e-05	6.89028e-05	7.20408e-05	6.43433e-05
Water	GBR	0.000332449	0.000345334	0.000320279	0.000337144	0.000381044	0.000390502	0.000419443	0.000370245	0.000361639	0.000329439	0.000273132	0.000265395	0.000294686	0.000256256	0.000262576	0.00025438	0.000214974	0.000212127	0.000201918	0.000228265	0.000196976
Water	USA	0.000337536	0.000307849	0.000338077	0.000356143	0.000323513	0.000330337	0.000349417	0.000303117	0.000309547	0.000240594	0.00027258	0.000273403	0.000314886	0.000299593	0.000282243	0.000240749	0.000248688	0.000250706	0.000236723	0.000228659	0.000226821
Water	JPN	0.000223266	0.000209779	0.000195329	0.000186295	0.000211359	0.000222784	0.000241449	0.000222688	0.000216363	0.000180075	0.00015559	0.000188154	0.000186317	0.000156692	0.000153144	0.000118346	9.13914e-05	0.000108921	9.71065e-05	0.000107312	9.08814e-05
Water	CHN	8.2304e-05	7.69537e-05	7.24402e-05	6.96098e-05	6.93065e-05	7.90599e-05	8.49087e-05	8.44406e-05	8.74979e-05	0.000103609	0.000110563	0.00012371	0.000119092	0.000122707	0.000127675	0.000129063	0.000117106	0.000124921	0.000123601	0.000135577	0.000128928
Water	CAN	0.000155746	0.000168875	0.000165131	0.000176574	0.000182598	0.000201632	0.0002275	0.000238631	0.000207331	0.000212433	0.000197931	0.0002153	0.000224813	0.000192308	0.000173999	0.000168521	0.000149641	0.000164302	0.000149361	0.000152727	0.000158916
Water	KOR	0.000174984	0.000201063	0.000336983	0.00020484	0.000243942	0.000240795	0.000276014	0.000307006	0.000245547	0.00018237	0.000188483	0.000242939	0.00025515	0.000240614	0.00020023	0.000173158	0.000159359	0.000188884	0.000183798	0.000167162	0.000156979
Water	BRA	3.33063e-05	2.67903e-05	2.73552e-05	2.76391e-05	2.62359e-05	2.58924e-05	2.81656e-05	3.06976e-05	3.49905e-05	3.21847e-05	3.34655e-05	3.98823e-05	3.93096e-05	3.7852e-05	3.51786e-05	3.01898e-05	2.85127e-05	3.00257e-05	2.78429e-05	2.92944e-05	2.79464e-05
Water	IND	0.000253876	0.00025597	0.000228619	0.000235636	0.000223657	0.000227827	0.000240322	0.00024294	0.000247178	0.000236351	0.000239587	0.000221681	0.000233741	0.000223309	0.000214695	0.000224043	0.000249186	0.000248534	0.000250528	0.000247169	0.000245003
Water	MEX	0.000257448	0.000267376	0.000257976	0.000236707	0.000221592	0.000236593	0.0002438	0.000222821	0.000220031	0.000236508	0.000213377	0.000220549	0.000229657	0.000203308	0.000183387	0.000170085	0.000159721	0.00017282	0.000175424	0.000170163	0.000145719
Water	RUS	0.000123082	0.000124323	8.42018e-05	9.55292e-05	0.000135468	0.000116781	0.000151896	0.000158686	0.000174879	0.000150464	0.000173019	0.000176957	0.000204972	0.000213216	0.000182347	0.000148544	0.000126251	0.000128405	0.000135297	0.000139002	0.000115607
Water	AUS	0.000572687	0.000742452	0.000753721	0.00061219	0.000541422	0.000571228	0.000743336	0.00053996	0.000375968	0.000412199	0.000333486	0.000364866	0.000389617	0.000428471	0.000404268	0.000398665	0.000301233	0.000400965	0.000310408	0.000265794	0.000258979
Water	CHE	0.00037418	0.000347881	0.000318039	0.000358581	0.00033979	0.000337617	0.000322927	0.000313409	0.000352357	0.000366934	0.000261876	0.000303516	0.000327848	0.000298266	0.000281307	0.000278271	0.000228153	0.000270061	0.000212394	0.000253314	0.000268265
Water	TUR	0.000227764	0.000172892	0.000166974	0.000192773	0.000173107	0.000206285	0.000211182	0.000211593	0.000224207	0.000150888	0.000216447	0.000155233	0.000206681	0.000198026	0.000250101	0.000202922	0.000206799	0.000217785	0.000189682	0.000188017	0.000274552
Water	TWN	0.000134431	0.00010245	0.00012153	0.000104897	0.000112073	0.000117268	0.000119226	9.99407e-05	9.7989e-05	9.03943e-05	9.0867e-05	7.89582e-05	6.93846e-05	8.44192e-05	8.48131e-05	7.38709e-05	6.61709e-05	6.83635e-05	6.52708e-05	6.37246e-05	5.37095e-05
Water	NOR	0.000252019	0.000325375	0.000272206	0.000274952	0.000303297	0.000300565	0.000316804	0.000324616	0.000397844	0.000307024	0.000292948	0.000325568	0.000316576	0.000298755	0.000225472	0.00020325	0.000201146	0.000223058	0.000216806	0.000236752	0.000198444
Water	IDN	9.65152e-05	9.3317e-05	9.84136e-05	9.53152e-05	0.000100939	0.000100857	0.000103289	0.000113543	0.000112809	0.000104918	0.000109852	0.000116544	0.000114577	0.000112054	0.000114687	0.00010243	9.83342e-05	0.000101085	0.000117353	9.82304e-05	9.25012e-05
Water	ZAF	0.000175486	0.000149255	0.00014241	0.000187964	0.000191286	0.000178709	0.000152811	0.000179533	0.000150982	0.000128799	0.000115772	0.000106039	0.000125721	0.000106882	0.000105762	0.000117107	0.000104934	0.000105222	9.72839e-05	0.000106784	9.56781e-05
Water	WWA	0.000147169	0.000137968	0.000156065	0.000146345	0.000155074	0.00014981	0.000134709	0.00012058	0.000128186	0.000161762	0.000152408	0.000138906	0.000151754	0.000154564	0.000152297	0.000141203	0.000151855	0.000151862	0.000158673	0.000132027	0.000147141
Water	WWL	5.43763e-05	5.44656e-05	5.25611e-05	4.57514e-05	4.51057e-05	4.87887e-05	5.96533e-05	5.78989e-05	6.36855e-05	6.74615e-05	5.71771e-05	5.92206e-05	6.05928e-05	6.28561e-05	6.26077e-05	6.41249e-05	4.95802e-05	5.01347e-05	4.72039e-05	4.41118e-05	4.45064e-05
Water	WWE	5.78981e-05	5.75192e-05	5.23791e-05	0.000106338	7.06881e-05	5.4114e-05	7.84487e-05	7.73863e-05	9.13751e-05	7.57858e-05	6.82211e-05	6.50525e-05	8.02822e-05	7.94451e-05	5.73674e-05	6.79272e-05	5.37963e-05	6.95357e-05	6.42337e-05	6.09684e-05	6.26757e-05
Water	WWF	6.87542e-05	6.99272e-05	8.3288e-05	7.99766e-05	7.15929e-05	8.23671e-05	7.11152e-05	7.92966e-05	8.2011e-05	7.62854e-05	7.59542e-05	8.46099e-05	8.37279e-05	8.20092e-05	8.49833e-05	8.15432e-05	8.45093e-05	8.06051e-05	7.03422e-05	7.52667e-05	7.36323e-05
Water	WWM	0.000667555	0.000602614	0.000624213	0.000455897	0.00050091	0.000539082	0.0004936	0.000522378	0.000559993	0.000518248	0.000506822	0.000575739	0.000521722	0.000581989	0.000567934	0.000512612	0.000510093	0.000492869	0.000471697	0.000469551	0.000460316
Water	Advanced	0.000320607	0.000316077	0.000314605	0.000329226	0.000324194	0.000330812	0.000347416	0.000322062	0.000314805	0.000279405	0.000247588	0.000256808	0.000280503	0.000250875	0.000241076	0.000219443	0.000204974	0.000221273	0.000200797	0.00020289	0.000201067
Water	EmergingDeveloping	0.00015435	0.00014859	0.000146404	0.000138758	0.000138877	0.000144867	0.000144939	0.000146437	0.000152457	0.000154491	0.000155293	0.000157375	0.000159822	0.000161086	0.000159083	0.000154299	0.000156872	0.000157814	0.000156418	0.000154167	0.000153489
Water	Global	0.000180093	0.000174355	0.000172115	0.000167693	0.000166858	0.000172772	0.00017515	0.000172498	0.000176423	0.000172819	0.000168747	0.000171776	0.000177159	0.000173896	0.00017077	0.000163576	0.000163715	0.000166834	0.00016272	0.000161079	0.000160232

## Sheet: Footprint_PerGDP
indicator	region	2000	2001	2002	2003	2004	2005	2006	2007	2008	2009	2010	2011	2012	2013	2014	2015	2016	2017	2018	2019	2020
Acid	AUT	0.202771	0.212724	0.215138	0.221737	0.223029	0.2185	0.212085	0.205618	0.202594	0.198391	0.192267	0.183328	0.173582	0.175571	0.168524	0.166967	0.161574	0.167207	0.162424	0.155722	0.147218
Acid	BEL	0.260778	0.253078	0.238228	0.255068	0.239835	0.246636	0.256928	0.247104	0.270526	0.251118	0.216924	0.204504	0.193419	0.196176	0.193158	0.194944	0.183631	0.186343	0.193319	0.178037	0.170245
Acid	BGR	0.401804	0.413289	0.369206	0.387641	0.337748	0.331085	0.316007	0.324374	0.252716	0.245826	0.209471	0.220398	0.214832	0.194508	0.194205	0.185479	0.174155	0.169363	0.153324	0.152276	0.151796
Acid	CYP	0.323226	0.306441	0.333241	0.353038	0.342963	0.358954	0.388165	0.403503	0.47715	0.448002	0.422642	0.402309	0.370531	0.344593	0.344226	0.306929	0.300342	0.297029	0.273499	0.264871	0.229556
Acid	CZE	0.370744	0.36294	0.34939	0.36746	0.319124	0.291641	0.306554	0.284646	0.281576	0.258244	0.269218	0.268641	0.244034	0.240244	0.221698	0.213078	0.188297	0.204571	0.180871	0.196531	0.173781
Acid	DEU	0.249201	0.240127	0.230948	0.246002	0.24052	0.238698	0.234725	0.220869	0.226744	0.218032	0.208921	0.204351	0.194617	0.19344	0.185967	0.177356	0.176799	0.175416	0.170438	0.165435	0.151259
Acid	DNK	0.237044	0.23217	0.218348	0.233786	0.23679	0.214869	0.231533	0.239553	0.227448	0.211775	0.199006	0.194996	0.175841	0.185328	0.177101	0.177798	0.193677	0.169713	0.125633	0.178171	0.151018
Acid	EST	0.485225	0.471718	0.414492	0.443458	0.408964	0.354113	0.373743	0.382818	0.330541	0.316192	0.345708	0.309934	0.263479	0.295666	0.272666	0.239984	0.225972	0.230226	0.204146	0.151804	0.152098
Acid	ESP	0.20162	0.199364	0.207977	0.207266	0.218158	0.223019	0.216352	0.224726	0.200258	0.17342	0.161436	0.163804	0.152721	0.144795	0.147969	0.146329	0.136862	0.142203	0.133012	0.129999	0.120296
Acid	FIN	0.260097	0.27458	0.250609	0.31924	0.279218	0.273175	0.294389	0.276385	0.249739	0.247878	0.266578	0.255789	0.223168	0.225186	0.206303	0.18356	0.190299	0.184006	0.188638	0.172514	0.142008
Acid	FRA	0.176838	0.172097	0.169465	0.177512	0.17985	0.178015	0.172272	0.167356	0.166506	0.1579	0.154902	0.148744	0.146789	0.144325	0.134801	0.131688	0.133652	0.139137	0.134079	0.128905	0.117704
Acid	GRC	0.331912	0.315091	0.31044	0.318172	0.303634	0.321299	0.319304	0.360335	0.319238	0.320626	0.342976	0.329186	0.307334	0.29737	0.304129	0.233619	0.219832	0.247435	0.262076	0.182445	0.257848
Acid	HRV	0.210277	0.222117	0.231853	0.247297	0.240141	0.23721	0.226979	0.22057	0.222617	0.209871	0.194192	0.187281	0.166533	0.173702	0.162998	0.156749	0.159264	0.160753	0.156255	0.151722	0.158308
Acid	HUN	0.231022	0.238713	0.237416	0.265596	0.256799	0.239069	0.234582	0.230818	0.233155	0.209714	0.203044	0.193051	0.182398	0.181313	0.168619	0.166318	0.162547	0.158607	0.160947	0.163653	0.142248
Acid	IRL	0.248079	0.259638	0.241845	0.275561	0.260661	0.278939	0.288017	0.288986	0.291659	0.271964	0.205955	0.195664	0.18156	0.165453	0.173278	0.134092	0.15256	0.179181	0.150049	0.25603	0.147235
Acid	ITA	0.185909	0.180447	0.186168	0.195468	0.201395	0.200214	0.201178	0.196046	0.19148	0.185717	0.191744	0.184473	0.169214	0.162474	0.157218	0.156208	0.150788	0.148082	0.150215	0.143051	0.136301
Acid	LTU	0.208897	0.20467	0.194586	0.177529	0.185763	0.208916	0.207785	0.21402	0.211039	0.181654	0.204942	0.206047	0.195149	0.159952	0.1606	0.137862	0.128151	0.125308	0.130159	0.12919	0.098439
Acid	LUX	0.193502	0.243809	0.239628	0.253515	0.283809	0.281877	0.258454	0.241487	0.248372	0.23741	0.208573	0.198838	0.201504	0.197597	0.225939	0.198312	0.208038	0.193571	0.181814	0.205519	0.194431
Acid	LVA	0.25095	0.249035	0.236985	0.231725	0.221305	0.190838	0.221872	0.225658	0.215383	0.170464	0.180503	0.197157	0.159878	0.160145	0.183111	0.155791	0.145844	0.136083	0.140442	0.133056	0.120161
Acid	MLT	0.237795	0.259955	0.227149	0.249128	0.252695	0.255014	0.241713	0.228869	0.222438	0.207139	0.194759	0.189633	0.193207	0.154259	0.135611	0.112693	0.120072	0.105859	0.107186	0.105324	0.110631
Acid	NLD	0.232536	0.225869	0.224779	0.235025	0.241949	0.230467	0.22529	0.220714	0.216251	0.206638	0.19292	0.190727	0.184706	0.185092	0.171627	0.18373	0.161115	0.173297	0.164974	0.173349	0.155547
Acid	POL	0.3874	0.381802	0.369416	0.361964	0.342714	0.342466	0.322961	0.323625	0.317754	0.28593	0.291998	0.26497	0.254655	0.244176	0.232188	0.216709	0.213894	0.213799	0.203562	0.18499	0.180664
Acid	PRT	0.201153	0.198748	0.207087	0.200108	0.213992	0.219607	0.197659	0.192589	0.190269	0.181733	0.17122	0.160814	0.14359	0.135429	0.14152	0.133833	0.137508	0.133126	0.130619	0.119225	0.117889
Acid	ROM	0.247846	0.250974	0.229826	0.244239	0.210725	0.208573	0.211574	0.208833	0.188303	0.157755	0.152724	0.16547	0.148473	0.125915	0.116854	0.116643	0.116767	0.114507	0.116219	0.109309	0.108661
Acid	SWE	0.200314	0.18528	0.183405	0.202389	0.18982	0.180548	0.176263	0.17032	0.168621	0.154541	0.15588	0.149485	0.133488	0.135817	0.132417	0.128322	0.124731	0.120827	0.120582	0.117066	0.102051
Acid	SVN	0.262843	0.232552	0.227755	0.250918	0.233459	0.225751	0.217351	0.224478	0.251256	0.213089	0.216101	0.217265	0.199753	0.18587	0.169722	0.17133	0.165455	0.162461	0.146524	0.14785	0.155533
Acid	SVK	0.379734	0.360156	0.342298	0.328667	0.309262	0.302856	0.283371	0.288366	0.299692	0.262974	0.245029	0.231517	0.19942	0.200821	0.186718	0.18087	0.184966	0.186886	0.188104	0.183547	0.165635
Acid	GBR	0.276861	0.271984	0.268966	0.264054	0.271766	0.265657	0.273568	0.263963	0.246907	0.222548	0.228198	0.21924	0.213802	0.2078	0.199554	0.195786	0.179335	0.173207	0.170134	0.170533	0.148333
Acid	USA	0.412668	0.409229	0.401906	0.395234	0.389431	0.383902	0.371025	0.365622	0.338941	0.323199	0.328794	0.312255	0.292496	0.293057	0.293389	0.284268	0.269094	0.263648	0.266752	0.289944	0.227636
Acid	JPN	0.297176	0.290672	0.289244	0.290402	0.285975	0.288371	0.284382	0.275987	0.275767	0.267521	0.266952	0.292012	0.292179	0.273291	0.264908	0.245762	0.236875	0.233817	0.22646	0.229598	0.216802
Acid	CHN	0.562469	0.550341	0.533267	0.551991	0.578186	0.561865	0.522701	0.505473	0.480047	0.520729	0.501026	0.505027	0.476552	0.46925	0.445149	0.421558	0.393487	0.374364	0.372711	0.359208	0.349683
Acid	CAN	0.306477	0.300812	0.291291	0.322568	0.318525	0.30194	0.297877	0.301725	0.301582	0.269488	0.304946	0.304346	0.290898	0.285005	0.231401	0.204548	0.233382	0.241556	0.130146	-0.431283	0.247792
Acid	KOR	0.375045	0.361538	0.359416	0.365198	0.355482	0.360941	0.378359	0.369293	0.343905	0.298722	0.309757	0.324081	0.309321	0.291042	0.273149	0.271528	0.263333	0.282033	0.267338	0.261151	0.242087
Acid	BRA	0.140698	0.142192	0.136	0.133813	0.12348	0.123438	0.121138	0.122537	0.133212	0.124437	0.141397	0.146826	0.150959	0.157006	0.159165	0.143917	0.135125	0.139521	0.132457	0.135525	0.121823
Acid	IND	0.275014	0.265263	0.265535	0.250043	0.244484	0.243008	0.233289	0.24648	0.244819	0.255877	0.258832	0.265574	0.265598	0.240739	0.249767	0.239569	0.221221	0.225596	0.219811	0.210646	0.204329
Acid	MEX	0.218996	0.218886	0.221438	0.216819	0.215087	0.218972	0.22089	0.220212	0.223071	0.216678	0.215244	0.212996	0.208166	0.201378	0.196402	0.192687	0.188778	0.18808	0.179455	0.178476	0.14786
Acid	RUS	0.290047	0.302801	0.271914	0.268376	0.26076	0.24382	0.249369	0.241548	0.238624	0.228225	0.221479	0.234717	0.230212	0.228804	0.21406	0.207348	0.208851	0.217653	0.210341	0.21019	0.21105
Acid	AUS	0.402456	0.393279	0.411958	0.391777	0.405297	0.402422	0.406713	0.410831	0.375215	0.386661	0.369513	0.384388	0.367041	0.347339	0.335116	0.33297	0.31244	0.31939	0.291154	0.289954	0.270066
Acid	CHE	0.184346	0.176578	0.181126	0.187156	0.189735	0.194288	0.178485	0.173362	0.178767	0.18857	0.196249	0.223503	0.199116	0.200354	0.17927	0.190504	0.19191	0.190437	0.178178	0.183475	0.18988
Acid	TUR	0.255313	0.21987	0.225922	0.22519	0.226178	0.230326	0.233979	0.246969	0.239006	0.224819	0.241428	0.243811	0.239191	0.230186	0.24797	0.227366	0.206347	0.207457	0.185102	0.164131	0.170736
Acid	TWN	81.7844	81.5989	72.723	70.5445	73.3944	65.075	61.4416	53.1458	53.2897	43.8175	45.39	42.1452	40.3741	38.4619	35.514	32.7453	31.1728	28.6181	27.7323	24.9888	22.1621
Acid	NOR	0.153102	0.147406	0.156066	0.158298	0.152509	0.148285	0.157672	0.164105	0.158377	0.161037	0.171435	0.167627	0.160283	0.164803	0.140565	0.161244	0.137776	0.146091	0.138392	0.144549	0.11561
Acid	IDN	0.167325	0.172927	0.184958	0.189704	0.183812	0.172588	0.182367	0.182983	0.191425	0.166607	0.179391	0.1939	0.187222	0.177088	0.180934	0.169473	0.156872	0.168244	0.171325	0.176645	0.164513
Acid	ZAF	0.475569	0.462441	0.48138	0.529687	0.564221	0.51762	0.483118	0.484158	0.4979	0.492289	0.485548	0.450663	0.484827	0.465685	0.47114	0.436849	0.417157	0.425582	0.382894	0.435049	0.450239
Acid	WWA	0.281924	0.270163	0.28195	0.269845	0.271479	0.2741	0.270335	0.246638	0.252548	0.255294	0.280819	0.257369	0.281044	0.277472	0.248694	0.228735	0.269261	0.231004	0.262824	0.242532	0.250305
Acid	WWL	0.198296	0.193854	0.177128	0.172806	0.166556	0.191295	0.195173	0.192445	0.200684	0.18656	0.207568	0.211548	0.217514	0.216619	0.208099	0.21616	0.19065	0.190319	0.170702	0.177547	0.163912
Acid	WWE	0.441866	0.445716	0.437959	0.421997	0.3428	0.331965	0.354594	0.370486	0.327676	0.314249	0.309379	0.297763	0.303226	0.275462	0.249344	0.245868	0.240035	0.21928	0.243223	0.219047	0.219591
Acid	WWF	0.144047	0.148589	0.145739	0.146919	0.144075	0.142015	0.139909	0.161496	0.165823	0.163251	0.166413	0.171101	0.16624	0.179754	0.175617	0.177312	0.181933	0.186537	0.170376	0.174118	0.167481
Acid	WWM	0.295242	0.312649	0.321921	0.314816	0.307765	0.322348	0.321822	0.316008	0.353743	0.360155	0.365006	0.335787	0.357429	0.363022	0.356208	0.348177	0.331842	0.320349	0.315526	0.346371	0.327847
Acid	Advanced	0.328315	0.32337	0.319265	0.322984	0.320656	0.318092	0.312815	0.307341	0.294036	0.278549	0.280694	0.275553	0.262306	0.257677	0.250496	0.242243	0.233374	0.232408	0.225489	0.213484	0.206199
Acid	EmergingDeveloping	0.284793	0.286105	0.284499	0.285101	0.286391	0.28754	0.282756	0.281252	0.2829	0.293607	0.29788	0.297989	0.298039	0.295065	0.285422	0.27427	0.267061	0.258602	0.257809	0.254234	0.249501
Acid	Global	0.309613	0.306865	0.303622	0.30594	0.304897	0.303446	0.298064	0.294496	0.288018	0.287077	0.2913	0.28739	0.283014	0.279117	0.271159	0.26154	0.252261	0.247284	0.244344	0.237879	0.232014
Biodiversity	AUT	1.21421e-15	1.25619e-15	1.22986e-15	1.23337e-15	1.22931e-15	1.159e-15	1.13941e-15	1.11653e-15	1.04763e-15	1.05366e-15	1.03982e-15	1.02922e-15	9.95315e-16	1.03702e-15	9.70675e-16	9.85097e-16	9.77236e-16	1.02465e-15	9.91806e-16	9.2914e-16	9.38101e-16
Biodiversity	BEL	1.72511e-15	1.71963e-15	1.59342e-15	1.66458e-15	1.65724e-15	1.55816e-15	1.67934e-15	1.56813e-15	1.76417e-15	1.6447e-15	1.31941e-15	1.16312e-15	1.18888e-15	1.20949e-15	1.20018e-15	1.0514e-15	1.14569e-15	1.18219e-15	1.18943e-15	1.09353e-15	1.05464e-15
Biodiversity	BGR	2.42942e-15	2.4479e-15	2.34636e-15	2.25445e-15	2.1447e-15	1.91186e-15	1.81416e-15	1.79634e-15	1.55452e-15	1.54529e-15	1.09855e-15	1.06165e-15	1.16539e-15	9.44979e-16	9.78566e-16	9.62425e-16	8.93998e-16	9.14616e-16	8.80936e-16	8.9588e-16	9.11129e-16
Biodiversity	CYP	2.53398e-15	2.43596e-15	2.91054e-15	2.94488e-15	2.84209e-15	3.20665e-15	3.80213e-15	4.09009e-15	5.47229e-15	5.07368e-15	4.72113e-15	4.55691e-15	4.22867e-15	4.08293e-15	3.88132e-15	3.45096e-15	3.11573e-15	2.94707e-15	2.7557e-15	2.3106e-15	2.06989e-15
Biodiversity	CZE	1.30461e-15	1.31344e-15	1.28887e-15	1.29837e-15	1.27051e-15	1.15136e-15	1.15851e-15	1.11309e-15	1.0865e-15	9.85184e-16	9.53892e-16	1.05063e-15	1.01639e-15	9.50049e-16	8.95836e-16	8.51929e-16	8.15277e-16	8.92628e-16	8.45316e-16	8.40955e-16	8.16555e-16
Biodiversity	DEU	1.15858e-15	1.07269e-15	1.05492e-15	1.13442e-15	1.18441e-15	1.13204e-15	1.12707e-15	1.101e-15	1.10154e-15	1.06489e-15	9.57054e-16	9.78227e-16	9.175e-16	8.67055e-16	8.55179e-16	8.3956e-16	7.94537e-16	8.40886e-16	8.29516e-16	8.32346e-16	7.76816e-16
Biodiversity	DNK	1.59749e-15	1.54522e-15	1.38339e-15	1.37203e-15	1.56725e-15	1.3842e-15	1.53217e-15	1.58163e-15	1.56683e-15	1.49293e-15	1.35588e-15	1.54862e-15	1.4394e-15	1.37648e-15	1.51816e-15	1.38423e-15	1.43985e-15	1.59635e-15	9.0341e-16	1.44883e-15	1.43086e-15
Biodiversity	EST	1.42399e-15	1.51085e-15	1.50004e-15	1.50094e-15	1.47394e-15	1.24468e-15	1.30433e-15	1.29422e-15	1.2627e-15	1.22486e-15	1.02991e-15	1.02074e-15	9.70431e-16	1.0798e-15	9.70885e-16	9.94075e-16	8.78723e-16	9.65264e-16	1.04872e-15	8.04776e-16	1.02147e-15
Biodiversity	ESP	2.31368e-15	2.32316e-15	2.36572e-15	2.26631e-15	2.25675e-15	2.28393e-15	2.05311e-15	2.04446e-15	1.94344e-15	1.8e-15	1.6766e-15	1.70786e-15	1.626e-15	1.50606e-15	1.44695e-15	1.39268e-15	1.30034e-15	1.30944e-15	1.32211e-15	1.21664e-15	1.43303e-15
Biodiversity	FIN	1.43513e-15	1.38767e-15	1.25849e-15	1.49962e-15	1.47392e-15	1.45598e-15	1.49298e-15	1.40705e-15	1.34426e-15	1.41658e-15	1.26067e-15	1.30974e-15	1.31457e-15	1.33962e-15	1.25793e-15	1.18877e-15	1.17395e-15	1.16831e-15	1.16338e-15	1.12392e-15	9.96141e-16
Biodiversity	FRA	1.27426e-15	1.27268e-15	1.23782e-15	1.26292e-15	1.2259e-15	1.19699e-15	1.17587e-15	1.13281e-15	1.09059e-15	1.02814e-15	9.70771e-16	9.79386e-16	1.00006e-15	9.61243e-16	9.36591e-16	9.07006e-16	9.1372e-16	9.2701e-16	9.25595e-16	8.92259e-16	8.68287e-16
Biodiversity	GRC	5.40962e-15	4.7498e-15	4.10899e-15	4.1685e-15	4.2151e-15	4.32598e-15	4.21406e-15	5.07748e-15	4.15303e-15	4.48016e-15	4.83479e-15	4.64503e-15	4.51131e-15	4.46407e-15	4.2973e-15	3.16825e-15	3.08235e-15	3.66589e-15	3.9219e-15	2.48582e-15	4.33854e-15
Biodiversity	HRV	1.3957e-15	1.44e-15	1.4954e-15	1.55055e-15	1.55858e-15	1.41734e-15	1.36689e-15	1.30948e-15	1.3747e-15	1.29398e-15	1.17075e-15	1.13707e-15	1.07749e-15	1.06411e-15	9.97123e-16	9.36255e-16	9.15365e-16	9.29266e-16	9.36606e-16	9.25312e-16	9.69269e-16
Biodiversity	HUN	1.48147e-15	1.38845e-15	1.42012e-15	1.3656e-15	1.48772e-15	1.35484e-15	1.16161e-15	1.18922e-15	1.14404e-15	1.0577e-15	8.34547e-16	9.42909e-16	8.7442e-16	8.56218e-16	8.19592e-16	7.55881e-16	8.12241e-16	7.74904e-16	7.26114e-16	6.90004e-16	6.62781e-16
Biodiversity	IRL	2.006e-15	2.0921e-15	1.88152e-15	1.91032e-15	1.67778e-15	1.68993e-15	1.75006e-15	1.77071e-15	1.7392e-15	1.79221e-15	1.19995e-15	1.12778e-15	9.66003e-16	1.12734e-15	1.18236e-15	9.09375e-16	1.19289e-15	1.33916e-15	1.16683e-15	1.57142e-15	9.93039e-16
Biodiversity	ITA	1.55851e-15	1.49799e-15	1.52353e-15	1.55844e-15	1.5958e-15	1.52758e-15	1.6129e-15	1.5559e-15	1.51713e-15	1.5269e-15	1.46e-15	1.43879e-15	1.3499e-15	1.30763e-15	1.22139e-15	1.26882e-15	1.24369e-15	1.26914e-15	1.23333e-15	1.135e-15	1.14548e-15
Biodiversity	LTU	5.8178e-16	5.60183e-16	6.67444e-16	6.011e-16	6.8717e-16	7.83273e-16	8.39019e-16	8.23392e-16	9.59592e-16	7.53656e-16	6.99517e-16	7.58108e-16	9.7174e-16	6.43874e-16	7.22538e-16	6.30684e-16	6.02996e-16	5.841e-16	6.51599e-16	6.83534e-16	5.89107e-16
Biodiversity	LUX	1.47031e-15	1.51877e-15	1.24929e-15	1.34252e-15	1.50377e-15	1.50866e-15	1.47304e-15	1.34425e-15	1.4313e-15	1.36373e-15	1.23198e-15	1.26402e-15	1.27877e-15	1.34711e-15	1.51431e-15	1.25052e-15	1.38521e-15	1.2272e-15	1.18357e-15	1.62567e-15	1.44413e-15
Biodiversity	LVA	1.26909e-15	1.32701e-15	1.23508e-15	1.24184e-15	1.2354e-15	1.11713e-15	1.36536e-15	1.59888e-15	1.33691e-15	9.93881e-16	8.4857e-16	1.07375e-15	1.77615e-15	9.49859e-16	1.10938e-15	1.02674e-15	1.08042e-15	1.32122e-15	1.13879e-15	1.22246e-15	1.448e-15
Biodiversity	MLT	2.00434e-15	2.04247e-15	1.81794e-15	1.93855e-15	1.96038e-15	1.6958e-15	1.59955e-15	1.48858e-15	1.461e-15	1.34611e-15	1.2361e-15	1.16094e-15	1.17904e-15	1.01877e-15	9.39657e-16	7.72384e-16	8.27268e-16	7.14641e-16	8.60623e-16	9.32742e-16	8.38874e-16
Biodiversity	NLD	1.90575e-15	1.80467e-15	1.78918e-15	1.86853e-15	1.99389e-15	1.76267e-15	1.67666e-15	1.68926e-15	1.52875e-15	1.51173e-15	1.03215e-15	1.11579e-15	1.12291e-15	1.0859e-15	1.10162e-15	1.30131e-15	1.08898e-15	1.24792e-15	1.17661e-15	1.14654e-15	1.09518e-15
Biodiversity	POL	1.56933e-15	1.55147e-15	1.47924e-15	1.44763e-15	1.37376e-15	1.41056e-15	1.34352e-15	1.38169e-15	1.35801e-15	1.18353e-15	1.23265e-15	1.1627e-15	1.10599e-15	1.04777e-15	9.80951e-16	9.50995e-16	9.17936e-16	9.38515e-16	8.79627e-16	8.27691e-16	8.60972e-16
Biodiversity	PRT	1.75541e-15	1.74379e-15	1.7753e-15	1.80139e-15	1.7239e-15	1.61893e-15	1.55915e-15	1.65581e-15	1.63364e-15	1.524e-15	1.50902e-15	1.39799e-15	1.27468e-15	1.26174e-15	1.23193e-15	1.26579e-15	1.17382e-15	1.18145e-15	1.21658e-15	1.15882e-15	1.21118e-15
Biodiversity	ROM	1.0891e-15	1.07185e-15	9.89099e-16	1.06596e-15	1.04107e-15	9.31006e-16	9.18306e-16	9.57422e-16	8.87211e-16	8.35593e-16	8.5564e-16	8.69372e-16	6.74926e-16	6.55965e-16	6.63822e-16	6.11106e-16	6.11361e-16	6.32647e-16	6.25405e-16	6.14777e-16	6.25267e-16
Biodiversity	SWE	1.22342e-15	1.13914e-15	1.10032e-15	1.15823e-15	1.13351e-15	1.08996e-15	1.06871e-15	1.07484e-15	1.04941e-15	1.02944e-15	1.06631e-15	1.05737e-15	1.07372e-15	1.08024e-15	1.04654e-15	9.66181e-16	9.31703e-16	9.74841e-16	9.04494e-16	8.47705e-16	8.4326e-16
Biodiversity	SVN	3.15698e-15	2.92038e-15	2.80696e-15	2.83891e-15	2.79502e-15	2.45642e-15	2.24717e-15	2.08181e-15	2.04702e-15	1.95397e-15	1.8339e-15	1.76696e-15	1.67145e-15	1.56326e-15	1.48406e-15	1.45224e-15	1.25017e-15	1.26201e-15	1.23517e-15	1.18489e-15	1.30819e-15
Biodiversity	SVK	1.18249e-15	1.16507e-15	1.17679e-15	1.18033e-15	1.21515e-15	1.16082e-15	1.1143e-15	1.11986e-15	1.16978e-15	1.07919e-15	8.94207e-16	9.09626e-16	8.48975e-16	8.32929e-16	8.72652e-16	8.35117e-16	7.48159e-16	8.29754e-16	7.91593e-16	8.38262e-16	7.75014e-16
Biodiversity	GBR	1.80761e-15	1.74588e-15	1.77085e-15	1.7095e-15	1.79592e-15	1.80828e-15	1.72848e-15	1.48315e-15	1.43492e-15	1.29785e-15	1.2426e-15	1.28248e-15	1.2486e-15	1.20992e-15	1.18941e-15	1.3512e-15	1.068e-15	1.08313e-15	1.09523e-15	1.06048e-15	1.01368e-15
Biodiversity	USA	4.34323e-15	4.09324e-15	4.13397e-15	3.98516e-15	3.71905e-15	3.67781e-15	3.52249e-15	3.18959e-15	3.06492e-15	2.85695e-15	3.01617e-15	3.06291e-15	3.08911e-15	2.9559e-15	2.78667e-15	2.64841e-15	2.64751e-15	2.58279e-15	2.45947e-15	2.39238e-15	2.44084e-15
Biodiversity	JPN	2.2282e-15	2.11642e-15	1.9434e-15	1.94195e-15	1.94057e-15	2.0063e-15	2.00524e-15	1.93686e-15	2.02025e-15	1.8224e-15	1.77706e-15	1.98427e-15	1.98887e-15	1.65588e-15	1.53777e-15	1.37143e-15	1.24566e-15	1.34813e-15	1.29337e-15	1.31747e-15	1.25439e-15
Biodiversity	CHN	5.03339e-15	4.73523e-15	4.41727e-15	4.16684e-15	4.14775e-15	3.91325e-15	3.63512e-15	3.29431e-15	3.12551e-15	3.15601e-15	2.94601e-15	2.99027e-15	3.00216e-15	2.90337e-15	2.81758e-15	2.92492e-15	2.63328e-15	2.49589e-15	2.55767e-15	2.55231e-15	2.61445e-15
Biodiversity	CAN	1.76483e-15	1.75977e-15	1.66295e-15	1.81061e-15	1.7435e-15	1.77144e-15	1.79918e-15	1.86327e-15	1.76417e-15	1.8028e-15	1.79825e-15	1.99291e-15	1.95705e-15	1.79355e-15	1.54985e-15	1.52075e-15	1.42187e-15	1.5173e-15	1.34174e-15	8.60219e-16	1.47844e-15
Biodiversity	KOR	2.43644e-15	2.26346e-15	2.48397e-15	2.27495e-15	2.2661e-15	2.35543e-15	2.4716e-15	2.64493e-15	2.3408e-15	1.83459e-15	2.04325e-15	2.38188e-15	2.31698e-15	2.03661e-15	1.78855e-15	1.71595e-15	1.67846e-15	1.83309e-15	1.79619e-15	1.62833e-15	1.56302e-15
Biodiversity	BRA	1.09275e-14	1.01141e-14	1.02495e-14	1.07152e-14	9.80887e-15	9.71553e-15	9.09157e-15	8.56047e-15	8.19947e-15	8.25767e-15	7.61825e-15	7.47383e-15	6.8918e-15	6.92948e-15	6.51559e-15	5.87337e-15	7.19147e-15	7.05366e-15	5.74788e-15	5.68862e-15	4.863e-15
Biodiversity	IND	9.09393e-15	8.89244e-15	7.99662e-15	7.80864e-15	7.15804e-15	6.95199e-15	6.71351e-15	6.45842e-15	6.34828e-15	5.95493e-15	5.73045e-15	5.36368e-15	5.3041e-15	4.93084e-15	4.7077e-15	4.77417e-15	4.75336e-15	4.74019e-15	4.34239e-15	4.43613e-15	4.70474e-15
Biodiversity	MEX	1.81082e-14	1.8711e-14	1.82593e-14	1.72173e-14	1.58679e-14	1.65701e-14	1.58308e-14	1.47952e-14	1.48013e-14	1.62072e-14	1.44732e-14	1.40124e-14	1.40457e-14	1.31929e-14	1.20649e-14	1.15155e-14	1.05227e-14	1.10015e-14	1.12469e-14	1.12892e-14	1.03347e-14
Biodiversity	RUS	1.10376e-15	1.09104e-15	8.75466e-16	8.92265e-16	1.08314e-15	9.37545e-16	9.68526e-16	8.96996e-16	9.45785e-16	9.21778e-16	1.00651e-15	1.03784e-15	1.07884e-15	1.12449e-15	9.80578e-16	8.31752e-16	7.63665e-16	8.17841e-16	7.97328e-16	8.33964e-16	8.05022e-16
Biodiversity	AUS	1.14575e-14	1.36325e-14	1.32733e-14	1.20045e-14	9.95458e-15	9.99602e-15	1.03155e-14	8.40482e-15	6.05743e-15	7.17492e-15	5.5946e-15	5.72824e-15	6.24482e-15	6.06142e-15	5.76372e-15	5.52038e-15	4.88529e-15	5.42604e-15	4.54607e-15	4.0162e-15	4.37789e-15
Biodiversity	CHE	1.3612e-15	1.32325e-15	1.46403e-15	1.40244e-15	1.56935e-15	1.3088e-15	1.18206e-15	1.10789e-15	1.23869e-15	1.26507e-15	1.21281e-15	1.48906e-15	1.27432e-15	1.43044e-15	1.3123e-15	1.39635e-15	1.43927e-15	1.50811e-15	1.39419e-15	1.39717e-15	1.57064e-15
Biodiversity	TUR	3.8474e-15	3.68623e-15	3.69237e-15	3.6771e-15	3.17068e-15	3.33446e-15	3.18872e-15	3.13966e-15	3.03305e-15	2.74698e-15	3.09435e-15	2.77765e-15	2.76396e-15	2.44102e-15	2.47173e-15	2.33556e-15	2.28566e-15	2.105e-15	1.91327e-15	1.92237e-15	1.8664e-15
Biodiversity	TWN	4.38081e-13	3.63399e-13	3.06068e-13	2.86921e-13	2.84995e-13	2.56858e-13	2.38716e-13	1.97725e-13	1.94265e-13	1.55938e-13	1.79724e-13	1.71023e-13	1.50885e-13	1.50613e-13	1.27489e-13	1.11904e-13	1.02011e-13	9.40256e-14	9.08335e-14	8.22792e-14	7.20664e-14
Biodiversity	NOR	1.07529e-15	1.13191e-15	1.14785e-15	1.1142e-15	1.09513e-15	1.07502e-15	1.14588e-15	1.19289e-15	1.18944e-15	1.09821e-15	1.11419e-15	1.13147e-15	1.08076e-15	1.08414e-15	8.52766e-16	9.89532e-16	8.5377e-16	9.52298e-16	8.99323e-16	9.15889e-16	7.4411e-16
Biodiversity	IDN	7.40291e-15	7.19122e-15	7.36487e-15	7.15594e-15	7.05524e-15	6.78826e-15	6.57175e-15	6.50622e-15	6.39933e-15	6.07042e-15	6.20157e-15	5.90629e-15	5.51375e-15	5.31595e-15	5.17922e-15	4.69006e-15	4.64856e-15	4.33111e-15	4.46423e-15	4.14753e-15	4.08716e-15
Biodiversity	ZAF	8.09672e-15	7.51413e-15	7.25298e-15	7.92067e-15	7.87895e-15	7.1192e-15	6.50441e-15	6.74395e-15	6.00504e-15	6.08657e-15	5.93437e-15	5.46586e-15	6.26201e-15	5.68049e-15	5.43423e-15	5.09838e-15	4.49101e-15	5.61227e-15	4.76025e-15	5.30796e-15	5.6543e-15
Biodiversity	WWA	5.29617e-15	4.69574e-15	4.97939e-15	4.39973e-15	4.33873e-15	4.11528e-15	3.55132e-15	3.3634e-15	3.39133e-15	3.86151e-15	3.68385e-15	3.25984e-15	3.556e-15	3.47042e-15	3.13911e-15	3.01729e-15	3.5241e-15	2.94794e-15	3.24999e-15	2.72358e-15	3.08247e-15
Biodiversity	WWL	3.38554e-15	3.73522e-15	3.50925e-15	3.20203e-15	2.9316e-15	3.01446e-15	3.27597e-15	3.34289e-15	3.31548e-15	3.27865e-15	3.13892e-15	2.9847e-15	3.22534e-15	3.22278e-15	3.06813e-15	2.9285e-15	2.55462e-15	2.49564e-15	2.1548e-15	2.02592e-15	2.23639e-15
Biodiversity	WWE	4.79106e-15	4.96887e-15	3.74767e-15	4.20834e-15	3.34226e-15	2.99973e-15	3.21527e-15	3.19857e-15	2.57012e-15	2.60946e-15	2.38456e-15	2.1783e-15	2.09823e-15	2.47142e-15	2.14308e-15	2.30079e-15	2.30509e-15	2.09722e-15	1.97959e-15	2.1662e-15	2.17459e-15
Biodiversity	WWF	8.96829e-15	8.74591e-15	8.59749e-15	8.28559e-15	7.84028e-15	7.47484e-15	7.03969e-15	7.01035e-15	6.69185e-15	6.59221e-15	6.31239e-15	6.69075e-15	6.41297e-15	6.40627e-15	6.20706e-15	6.12637e-15	6.07004e-15	5.75642e-15	5.39058e-15	5.47082e-15	5.61376e-15
Biodiversity	WWM	3.08672e-15	3.2088e-15	3.14066e-15	2.74489e-15	2.73211e-15	2.64131e-15	2.83598e-15	2.86242e-15	3.03417e-15	3.18837e-15	3.06636e-15	3.12421e-15	3.28787e-15	3.23094e-15	3.08411e-15	3.01094e-15	2.87443e-15	2.85564e-15	2.78977e-15	2.91291e-15	2.7904e-15
Biodiversity	Advanced	2.95865e-15	2.86542e-15	2.85299e-15	2.79498e-15	2.67474e-15	2.65913e-15	2.59789e-15	2.419e-15	2.30121e-15	2.19553e-15	2.17585e-15	2.24155e-15	2.24235e-15	2.12608e-15	2.00744e-15	1.93119e-15	1.86801e-15	1.89538e-15	1.80538e-15	1.7335e-15	1.79005e-15
Biodiversity	EmergingDeveloping	6.11251e-15	5.94392e-15	5.71693e-15	5.42851e-15	5.11127e-15	4.96291e-15	4.70398e-15	4.46058e-15	4.33513e-15	4.40317e-15	4.17989e-15	4.04521e-15	4.05333e-15	3.92639e-15	3.71249e-15	3.62477e-15	3.57666e-15	3.43591e-15	3.32132e-15	3.25721e-15	3.27221e-15
Biodiversity	Global	4.34872e-15	4.22887e-15	4.14159e-15	4.00993e-15	3.82421e-15	3.76355e-15	3.6314e-15	3.45017e-15	3.34697e-15	3.3715e-15	3.27242e-15	3.22805e-15	3.26349e-15	3.15e-15	2.99164e-15	2.91788e-15	2.85575e-15	2.79566e-15	2.70191e-15	2.64567e-15	2.68098e-15
Climate	AUT	0.260067	0.271737	0.276821	0.283021	0.277882	0.271399	0.263512	0.255183	0.247851	0.24448	0.235255	0.226983	0.216659	0.219834	0.212011	0.208739	0.201169	0.208521	0.203561	0.193157	0.185762
Climate	BEL	0.330868	0.32238	0.305031	0.324454	0.303246	0.306777	0.323554	0.308887	0.337902	0.315302	0.26995	0.253842	0.239647	0.24322	0.243888	0.237923	0.227329	0.234195	0.238343	0.219602	0.213792
Climate	BGR	0.524357	0.536802	0.499397	0.519825	0.451995	0.431654	0.404906	0.413179	0.337325	0.328602	0.278625	0.288494	0.282147	0.262376	0.259258	0.246321	0.234711	0.230597	0.20695	0.210421	0.206286
Climate	CYP	0.35105	0.332117	0.363992	0.384461	0.37682	0.390893	0.423031	0.439564	0.525705	0.489729	0.472748	0.450071	0.41663	0.390023	0.391568	0.354784	0.353603	0.364873	0.340705	0.373618	0.323096
Climate	CZE	0.443929	0.434825	0.419091	0.438328	0.382051	0.348338	0.364602	0.338344	0.333905	0.308733	0.321312	0.324356	0.2971	0.290294	0.271085	0.259542	0.229261	0.249443	0.221878	0.239548	0.214672
Climate	DEU	0.310633	0.294982	0.286069	0.302214	0.294695	0.287915	0.281124	0.265892	0.272547	0.265625	0.250202	0.248479	0.23633	0.234012	0.226265	0.215075	0.213162	0.212973	0.20618	0.201761	0.185206
Climate	DNK	0.301671	0.293585	0.27827	0.289577	0.295864	0.269456	0.283771	0.292786	0.278071	0.259522	0.24151	0.245762	0.226996	0.231673	0.225019	0.227415	0.238831	0.215855	0.168851	0.227544	0.197226
Climate	EST	0.619511	0.596682	0.540196	0.566655	0.522855	0.451881	0.468497	0.465853	0.416257	0.403183	0.422083	0.381406	0.33646	0.378236	0.347393	0.312567	0.291538	0.302363	0.279794	0.226889	0.230837
Climate	ESP	0.275851	0.272275	0.28042	0.278013	0.286892	0.289036	0.283317	0.288885	0.26149	0.229943	0.217928	0.219033	0.205417	0.194984	0.199507	0.193207	0.180458	0.186153	0.174288	0.169797	0.164491
Climate	FIN	0.33535	0.336042	0.308302	0.389074	0.342958	0.337517	0.361622	0.33675	0.319431	0.316793	0.32459	0.318351	0.28369	0.286509	0.26558	0.238099	0.242043	0.236186	0.241162	0.225823	0.188382
Climate	FRA	0.239439	0.233236	0.230815	0.238439	0.239155	0.235921	0.230766	0.221594	0.219297	0.209051	0.202481	0.195143	0.193787	0.189228	0.17922	0.174196	0.175328	0.181406	0.174401	0.167464	0.157379
Climate	GRC	0.420841	0.397411	0.392882	0.398764	0.378091	0.395226	0.388402	0.434512	0.393637	0.390348	0.415265	0.403507	0.387205	0.373669	0.378895	0.300371	0.283669	0.316074	0.332642	0.245402	0.328632
Climate	HRV	0.273478	0.283485	0.300685	0.318665	0.310612	0.302229	0.288301	0.275627	0.284241	0.265769	0.247591	0.243107	0.219966	0.224679	0.213817	0.205339	0.202265	0.209175	0.202185	0.204256	0.211713
Climate	HUN	0.302673	0.303608	0.304648	0.333592	0.325533	0.300635	0.291806	0.289049	0.290035	0.260435	0.250361	0.240532	0.227153	0.226571	0.214685	0.20833	0.2009	0.198484	0.200103	0.202626	0.182938
Climate	IRL	0.353681	0.368748	0.368377	0.400913	0.36006	0.371694	0.377567	0.37863	0.377553	0.367001	0.277164	0.260612	0.234607	0.228225	0.246372	0.18317	0.207185	0.23769	0.200669	0.323158	0.189155
Climate	ITA	0.244083	0.235178	0.244814	0.252906	0.256918	0.253712	0.258596	0.247058	0.242076	0.234403	0.241412	0.231453	0.215114	0.206574	0.201148	0.198671	0.191342	0.189626	0.190739	0.180863	0.175648
Climate	LTU	0.349238	0.328267	0.32323	0.292996	0.29895	0.314677	0.303548	0.304572	0.297834	0.27091	0.280817	0.281472	0.272381	0.228982	0.23261	0.209833	0.196633	0.186265	0.185234	0.195194	0.155948
Climate	LUX	0.255237	0.301324	0.288702	0.311653	0.336278	0.335234	0.308014	0.284944	0.294722	0.282144	0.252225	0.244524	0.247137	0.252421	0.285166	0.246058	0.252708	0.238056	0.224839	0.256336	0.248168
Climate	LVA	0.35639	0.348065	0.333202	0.326813	0.314355	0.282367	0.312324	0.313441	0.303191	0.251193	0.256458	0.281672	0.234901	0.234468	0.259705	0.228341	0.206217	0.210437	0.202867	0.21152	0.191425
Climate	MLT	0.268994	0.282208	0.247426	0.271634	0.276532	0.281554	0.267075	0.254529	0.248553	0.23328	0.218368	0.214513	0.214937	0.17315	0.153165	0.134362	0.154367	0.140478	0.148113	0.20259	0.159168
Climate	NLD	0.308257	0.296804	0.298883	0.311616	0.3173	0.297183	0.294126	0.28427	0.27855	0.264475	0.241804	0.238439	0.231661	0.23346	0.217957	0.242861	0.206992	0.224706	0.213557	0.223452	0.20151
Climate	POL	0.501621	0.497341	0.481711	0.465007	0.434301	0.433707	0.408491	0.407747	0.40587	0.358499	0.367682	0.335332	0.319056	0.305881	0.287805	0.268668	0.265835	0.267225	0.253577	0.231149	0.22524
Climate	PRT	0.274362	0.268391	0.27596	0.274482	0.281988	0.285502	0.259989	0.253677	0.252321	0.239625	0.228574	0.213581	0.193109	0.184091	0.190992	0.182822	0.181039	0.176631	0.175055	0.165217	0.168367
Climate	ROM	0.325666	0.32522	0.307096	0.331537	0.289442	0.294565	0.281626	0.27149	0.244396	0.212088	0.208024	0.220582	0.196792	0.171132	0.163905	0.163582	0.162331	0.159118	0.160036	0.152849	0.15285
Climate	SWE	0.265596	0.245662	0.243308	0.266871	0.2489	0.235628	0.225316	0.220738	0.219583	0.201583	0.201087	0.197376	0.178639	0.182537	0.176758	0.171115	0.164216	0.16247	0.159005	0.15671	0.13981
Climate	SVN	0.356385	0.31974	0.315226	0.348597	0.322201	0.303587	0.286777	0.288085	0.317372	0.275318	0.275651	0.27903	0.258226	0.245536	0.230872	0.228383	0.209626	0.212302	0.192336	0.206231	0.208051
Climate	SVK	0.473627	0.44685	0.429499	0.414019	0.385031	0.375064	0.348986	0.352168	0.368093	0.327979	0.302284	0.289482	0.248741	0.258129	0.242444	0.233472	0.234045	0.238906	0.244064	0.239102	0.219354
Climate	GBR	0.36035	0.35425	0.351625	0.345573	0.350624	0.3423	0.353136	0.332365	0.311494	0.283065	0.284309	0.276441	0.271381	0.263827	0.256002	0.252074	0.227475	0.223583	0.217427	0.216945	0.194171
Climate	USA	0.503799	0.500888	0.489398	0.481493	0.476274	0.467517	0.451152	0.44113	0.410863	0.39219	0.397288	0.379231	0.354377	0.350794	0.350901	0.341527	0.32275	0.317632	0.317427	0.340169	0.277315
Climate	JPN	0.363742	0.352967	0.34684	0.351094	0.342765	0.345037	0.342808	0.329155	0.32848	0.312083	0.313147	0.346421	0.341865	0.314966	0.307177	0.283548	0.268184	0.271827	0.261247	0.265067	0.249805
Climate	CHN	0.758093	0.738744	0.70537	0.720622	0.751928	0.723575	0.671993	0.639915	0.608237	0.651915	0.620855	0.625094	0.590151	0.578249	0.551063	0.524422	0.484785	0.464497	0.465856	0.448365	0.439167
Climate	CAN	0.375411	0.365845	0.358894	0.399145	0.38578	0.370434	0.368107	0.369757	0.368215	0.332195	0.366856	0.369773	0.3588	0.349296	0.289454	0.261302	0.286285	0.296452	0.181741	-0.379558	0.300142
Climate	KOR	0.491983	0.465252	0.463834	0.475935	0.449113	0.454434	0.480566	0.466668	0.426138	0.364944	0.382803	0.410265	0.386262	0.356628	0.336922	0.330561	0.317721	0.34645	0.328371	0.317574	0.29556
Climate	BRA	0.347615	0.351883	0.351246	0.355885	0.330669	0.327797	0.313363	0.307023	0.308811	0.296282	0.30949	0.306937	0.301399	0.304113	0.30682	0.288822	0.296634	0.299478	0.272217	0.272488	0.249824
Climate	IND	0.503627	0.478476	0.465614	0.451224	0.428818	0.419912	0.404574	0.404457	0.40639	0.406864	0.404309	0.404662	0.392745	0.359553	0.360274	0.344292	0.31817	0.323903	0.311725	0.300374	0.296546
Climate	MEX	0.310555	0.313089	0.318547	0.306604	0.298211	0.305658	0.305092	0.30407	0.308398	0.301168	0.296847	0.292789	0.284771	0.277412	0.270948	0.265499	0.259612	0.26084	0.250514	0.250038	0.220889
Climate	RUS	0.362467	0.37633	0.33481	0.328174	0.333983	0.309703	0.311385	0.30108	0.295876	0.291873	0.277285	0.291745	0.286718	0.28604	0.268894	0.257982	0.260645	0.27219	0.260621	0.261205	0.26636
Climate	AUS	0.563111	0.584832	0.594173	0.525347	0.558938	0.536092	0.555318	0.556335	0.486117	0.502574	0.466101	0.518597	0.504118	0.444335	0.439948	0.441599	0.389617	0.419528	0.368318	0.361503	0.343119
Climate	CHE	0.233467	0.22316	0.230911	0.239689	0.238756	0.245546	0.223914	0.217559	0.225147	0.235886	0.243034	0.27881	0.250048	0.249587	0.222665	0.233897	0.232678	0.23318	0.214287	0.224683	0.234382
Climate	TUR	0.325161	0.286725	0.299375	0.300163	0.29189	0.297918	0.301749	0.315658	0.307167	0.287801	0.319906	0.319442	0.307855	0.296388	0.313459	0.290705	0.268715	0.268124	0.245197	0.22172	0.229522
Climate	TWN	134.03	114.412	101.824	91.9625	92.4743	79.5072	71.8793	62.089	61.6385	50.2156	51.5705	47.3586	45.0877	43.3519	39.9154	36.5582	34.4208	31.7134	30.7454	27.9762	24.7039
Climate	NOR	0.205327	0.195181	0.208495	0.212139	0.199518	0.192124	0.20402	0.207107	0.201753	0.204662	0.21442	0.213288	0.203615	0.209365	0.180045	0.201839	0.174202	0.18771	0.175108	0.185925	0.152762
Climate	IDN	0.262571	0.26342	0.279929	0.283728	0.284397	0.262224	0.279655	0.280633	0.29002	0.255739	0.270116	0.295464	0.296301	0.279478	0.290667	0.270902	0.250992	0.26852	0.270122	0.284051	0.265293
Climate	ZAF	0.629571	0.606045	0.630206	0.674113	0.710424	0.637245	0.568595	0.596615	0.604446	0.601312	0.58053	0.5402	0.618314	0.591313	0.585366	0.547895	0.511325	0.546764	0.489166	0.544536	0.572237
Climate	WWA	0.472422	0.442218	0.457267	0.428133	0.433044	0.426959	0.397521	0.374634	0.374689	0.399094	0.42124	0.37624	0.411763	0.400059	0.36082	0.330395	0.399179	0.332679	0.383979	0.339899	0.367061
Climate	WWL	0.342241	0.356804	0.337864	0.321916	0.298507	0.328378	0.342859	0.342352	0.347842	0.324898	0.340814	0.338835	0.347901	0.345572	0.334686	0.333396	0.295017	0.295308	0.260218	0.268893	0.269553
Climate	WWE	0.578741	0.589046	0.56346	0.539775	0.444925	0.428856	0.454853	0.460217	0.419667	0.396571	0.389145	0.369197	0.380044	0.352535	0.319889	0.317616	0.311156	0.288587	0.312003	0.285092	0.290139
Climate	WWF	0.493536	0.486075	0.478528	0.482246	0.455071	0.447688	0.426402	0.458688	0.435932	0.429641	0.430438	0.445204	0.425137	0.441019	0.430658	0.422598	0.438651	0.42501	0.407733	0.419703	0.419582
Climate	WWM	0.435325	0.449406	0.453225	0.440693	0.426534	0.44553	0.44646	0.430883	0.476052	0.481522	0.486185	0.456604	0.479662	0.476496	0.471392	0.468036	0.452369	0.440532	0.427249	0.463139	0.448603
Climate	Advanced	0.414709	0.406697	0.401118	0.403976	0.399435	0.393866	0.387719	0.377784	0.361689	0.342663	0.34288	0.339596	0.323033	0.314054	0.306562	0.296861	0.283403	0.285073	0.274787	0.262565	0.254475
Climate	EmergingDeveloping	0.448328	0.446319	0.44026	0.436272	0.433192	0.429863	0.417204	0.410793	0.409044	0.422033	0.421806	0.418274	0.416619	0.409614	0.396526	0.380935	0.373366	0.360528	0.358832	0.351971	0.351393
Climate	Global	0.430025	0.424245	0.41873	0.419316	0.415771	0.411122	0.402188	0.394788	0.385743	0.385449	0.387247	0.382204	0.376333	0.36857	0.358973	0.346467	0.334856	0.328754	0.324249	0.316088	0.312541
Land	AUT	9.26625e-08	9.42708e-08	9.51685e-08	9.42938e-08	8.84823e-08	8.19903e-08	8.02915e-08	7.73759e-08	7.36197e-08	8.01077e-08	7.88396e-08	7.65469e-08	7.25834e-08	7.41686e-08	7.15336e-08	7.40245e-08	7.15887e-08	7.08106e-08	6.88361e-08	6.2152e-08	6.74013e-08
Land	BEL	1.27974e-07	1.09664e-07	1.05239e-07	1.1168e-07	1.06194e-07	1.00944e-07	1.02801e-07	9.22431e-08	1.12528e-07	1.10259e-07	9.14173e-08	7.09376e-08	7.55381e-08	8.84959e-08	7.5446e-08	6.35077e-08	8.01437e-08	8.85182e-08	8.15789e-08	7.07136e-08	6.73956e-08
Land	BGR	3.47612e-07	3.47276e-07	3.39048e-07	3.25879e-07	3.0339e-07	2.63286e-07	2.36176e-07	2.08872e-07	1.83162e-07	1.92142e-07	1.22548e-07	1.12479e-07	1.3688e-07	9.07315e-08	1.00805e-07	1.01758e-07	9.10405e-08	9.79382e-08	8.76997e-08	8.71756e-08	9.68021e-08
Land	CYP	1.72845e-08	1.51443e-08	1.5561e-08	1.65941e-08	1.65168e-08	1.62992e-08	1.57942e-08	1.47533e-08	2.51975e-08	1.52601e-08	1.30462e-08	1.28007e-08	1.46794e-08	1.20378e-08	1.45382e-08	2.18417e-08	1.88711e-08	2.32914e-08	2.99144e-08	2.82605e-08	3.23119e-08
Land	CZE	1.43371e-07	1.32303e-07	1.41879e-07	1.42534e-07	1.33038e-07	1.12976e-07	1.15388e-07	1.04818e-07	1.0556e-07	9.51457e-08	9.81384e-08	9.9966e-08	1.01977e-07	9.00399e-08	8.72489e-08	8.37132e-08	8.00738e-08	8.69734e-08	8.48773e-08	7.67579e-08	8.39579e-08
Land	DEU	9.16674e-08	7.30287e-08	7.44308e-08	8.38782e-08	8.48721e-08	7.88159e-08	7.36905e-08	7.38138e-08	7.43743e-08	7.31658e-08	7.04384e-08	7.21017e-08	6.92792e-08	6.52308e-08	6.34105e-08	6.08849e-08	5.98742e-08	6.25539e-08	6.40909e-08	6.28513e-08	6.11074e-08
Land	DNK	9.82025e-08	9.20147e-08	8.26909e-08	7.19017e-08	9.31367e-08	7.98967e-08	8.12598e-08	8.16422e-08	8.68864e-08	8.86406e-08	6.83596e-08	8.24567e-08	8.33904e-08	6.59146e-08	5.90371e-08	6.01384e-08	5.75482e-08	5.5282e-08	5.90603e-08	6.02224e-08	6.06238e-08
Land	EST	3.74282e-07	3.20116e-07	2.59397e-07	2.52978e-07	2.12622e-07	1.73387e-07	1.83372e-07	1.5942e-07	1.54148e-07	1.74231e-07	1.26377e-07	8.23133e-08	7.90511e-08	1.04089e-07	7.25509e-08	1.04455e-07	9.14395e-08	1.07694e-07	1.21853e-07	6.5268e-08	1.19786e-07
Land	ESP	1.4024e-07	1.38916e-07	1.46549e-07	1.30342e-07	1.29921e-07	1.32655e-07	1.21189e-07	1.13154e-07	1.20647e-07	1.13945e-07	1.09303e-07	1.12265e-07	1.07183e-07	9.82823e-08	9.5343e-08	8.63885e-08	7.82347e-08	7.79579e-08	7.94215e-08	6.69059e-08	8.20622e-08
Land	FIN	9.46262e-08	8.514e-08	6.83525e-08	9.90502e-08	9.51541e-08	9.79694e-08	9.15742e-08	8.48587e-08	8.35392e-08	9.27338e-08	7.50829e-08	7.76674e-08	8.48813e-08	8.28416e-08	7.34106e-08	7.64424e-08	7.3758e-08	7.67376e-08	7.62226e-08	7.23971e-08	6.79883e-08
Land	FRA	1.04087e-07	1.00738e-07	1.01427e-07	1.0085e-07	9.39877e-08	9.19873e-08	8.98263e-08	8.66347e-08	8.03885e-08	8.21555e-08	7.80324e-08	7.5011e-08	7.46097e-08	7.21069e-08	6.79374e-08	6.66841e-08	7.2236e-08	6.91581e-08	6.82615e-08	6.47653e-08	7.02357e-08
Land	GRC	1.97652e-07	1.8944e-07	1.80629e-07	1.81681e-07	1.71732e-07	1.6597e-07	1.50208e-07	1.54744e-07	1.577e-07	1.39339e-07	1.33998e-07	1.53452e-07	1.53734e-07	1.48527e-07	1.38669e-07	1.38725e-07	1.23072e-07	1.26531e-07	1.35326e-07	1.15285e-07	1.33635e-07
Land	HRV	1.47741e-07	1.49487e-07	1.48849e-07	1.47357e-07	1.45746e-07	1.36771e-07	1.25336e-07	1.12461e-07	1.25946e-07	1.15477e-07	1.19234e-07	1.16932e-07	1.1395e-07	1.29513e-07	1.26978e-07	1.14216e-07	1.0821e-07	1.06592e-07	1.05084e-07	9.0092e-08	1.01247e-07
Land	HUN	2.18844e-07	1.85709e-07	1.82163e-07	1.65353e-07	1.90659e-07	1.83101e-07	1.30525e-07	1.29497e-07	1.33876e-07	1.21161e-07	8.64991e-08	1.20621e-07	1.07505e-07	1.05316e-07	1.02415e-07	8.49406e-08	9.31695e-08	7.90538e-08	8.04186e-08	7.14272e-08	7.42898e-08
Land	IRL	2.00818e-07	2.20934e-07	1.86429e-07	1.96818e-07	1.60146e-07	1.59708e-07	1.43866e-07	1.71984e-07	1.6716e-07	1.65733e-07	1.25899e-07	1.13506e-07	8.74177e-08	1.08057e-07	1.26888e-07	7.62052e-08	1.24337e-07	9.68712e-08	9.25152e-08	1.16397e-07	5.4857e-08
Land	ITA	8.33193e-08	8.03771e-08	8.39899e-08	8.55782e-08	8.44029e-08	8.19753e-08	8.15832e-08	7.70627e-08	7.89419e-08	7.71796e-08	7.84261e-08	7.82e-08	7.04779e-08	6.87596e-08	6.51747e-08	6.5956e-08	6.13289e-08	6.35263e-08	6.38356e-08	5.64065e-08	5.97069e-08
Land	LTU	6.72465e-07	5.19034e-07	4.76845e-07	3.77252e-07	3.68202e-07	3.27706e-07	3.08683e-07	2.69328e-07	2.31641e-07	2.3245e-07	2.10535e-07	1.96379e-07	1.54502e-07	1.40019e-07	1.20183e-07	1.1916e-07	1.85664e-07	1.51962e-07	1.40973e-07	1.40515e-07	1.43208e-07
Land	LUX	1.11715e-07	9.80704e-08	7.51919e-08	7.83071e-08	7.75466e-08	8.61997e-08	7.80922e-08	6.76418e-08	7.65825e-08	7.92245e-08	7.45295e-08	9.37277e-08	9.57123e-08	1.22758e-07	1.05916e-07	8.48335e-08	9.09148e-08	6.70595e-08	7.05438e-08	1.1113e-07	8.71543e-08
Land	LVA	5.33416e-07	4.96904e-07	4.644e-07	4.2554e-07	4.02495e-07	3.57381e-07	3.49377e-07	3.15357e-07	2.40874e-07	2.5554e-07	2.40209e-07	2.8093e-07	3.43484e-07	2.14742e-07	2.16765e-07	1.7492e-07	1.78622e-07	1.71914e-07	1.85513e-07	1.64625e-07	1.66444e-07
Land	MLT	6.35884e-09	4.29218e-09	3.35072e-09	4.61366e-09	5.73006e-09	5.8345e-09	4.62613e-09	3.91795e-09	3.9056e-09	3.28351e-09	2.89644e-09	2.83496e-09	2.80547e-09	2.44399e-09	1.90627e-09	6.77449e-09	1.22456e-08	1.33706e-08	2.19584e-08	2.27279e-08	2.58592e-08
Land	NLD	1.53994e-07	1.24858e-07	1.23463e-07	1.32503e-07	1.24856e-07	1.10113e-07	1.00843e-07	9.9552e-08	9.96713e-08	9.81879e-08	6.31237e-08	6.69149e-08	7.03951e-08	6.68656e-08	7.40719e-08	9.65245e-08	7.82643e-08	8.14716e-08	7.85356e-08	7.43855e-08	7.12713e-08
Land	POL	2.5194e-07	2.52995e-07	2.21496e-07	2.0984e-07	1.93121e-07	1.89205e-07	1.75613e-07	1.64015e-07	1.65344e-07	1.42759e-07	1.43755e-07	1.37868e-07	1.27773e-07	1.14949e-07	1.09149e-07	1.01875e-07	1.03104e-07	9.72275e-08	9.46262e-08	8.50187e-08	8.18263e-08
Land	PRT	1.25058e-07	1.20323e-07	1.17263e-07	1.27666e-07	1.13707e-07	1.08762e-07	1.04384e-07	1.05525e-07	1.13029e-07	1.10479e-07	1.08752e-07	1.06589e-07	9.71652e-08	9.64413e-08	9.82975e-08	9.74386e-08	8.32744e-08	8.16811e-08	8.39139e-08	7.49775e-08	7.94399e-08
Land	ROM	2.86632e-07	2.74418e-07	2.62028e-07	2.7166e-07	2.34563e-07	2.10836e-07	1.95013e-07	1.73047e-07	1.49739e-07	1.45818e-07	1.57743e-07	1.49861e-07	1.16048e-07	1.01462e-07	9.90482e-08	7.52545e-08	8.69464e-08	8.43322e-08	7.52565e-08	6.99433e-08	7.65296e-08
Land	SWE	8.66136e-08	7.88279e-08	8.35396e-08	8.20986e-08	8.37194e-08	7.77159e-08	7.1838e-08	7.47375e-08	7.24049e-08	8.00507e-08	8.18025e-08	8.32835e-08	8.28827e-08	8.35228e-08	7.55792e-08	6.71052e-08	6.2575e-08	6.60958e-08	6.36216e-08	5.98778e-08	6.08654e-08
Land	SVN	1.47631e-07	1.29729e-07	1.30201e-07	1.32399e-07	1.30644e-07	1.1785e-07	1.05173e-07	1.03179e-07	1.08003e-07	1.08059e-07	1.04322e-07	1.0432e-07	1.20014e-07	1.09389e-07	8.53728e-08	8.3178e-08	6.83744e-08	6.71188e-08	6.62544e-08	6.25824e-08	6.85667e-08
Land	SVK	2.19599e-07	1.76974e-07	1.91367e-07	1.7616e-07	1.69974e-07	1.40774e-07	1.16463e-07	1.15043e-07	1.30292e-07	1.20944e-07	9.15604e-08	9.39765e-08	8.04397e-08	8.51972e-08	9.35019e-08	8.28264e-08	8.58424e-08	7.76998e-08	8.58695e-08	9.27479e-08	8.23845e-08
Land	GBR	1.28987e-07	1.1716e-07	1.29694e-07	1.23674e-07	1.18417e-07	1.23964e-07	1.1761e-07	1.0447e-07	9.90508e-08	1.03721e-07	9.35692e-08	9.51811e-08	9.42023e-08	8.93038e-08	8.86201e-08	9.64315e-08	7.37265e-08	7.72067e-08	8.06061e-08	7.03815e-08	7.81265e-08
Land	USA	1.12724e-07	1.11585e-07	1.16286e-07	1.06527e-07	1.02437e-07	1.01185e-07	9.75297e-08	8.29413e-08	8.02007e-08	7.79367e-08	7.56857e-08	7.54375e-08	7.09327e-08	6.89559e-08	6.79311e-08	6.63947e-08	6.60155e-08	6.42255e-08	5.95615e-08	5.85674e-08	6.12741e-08
Land	JPN	9.72746e-08	9.36542e-08	7.79785e-08	8.57938e-08	8.57129e-08	8.87961e-08	8.45571e-08	8.07915e-08	8.98707e-08	7.52472e-08	8.10894e-08	8.19138e-08	7.87802e-08	6.80038e-08	6.43598e-08	5.76852e-08	4.94543e-08	5.35016e-08	4.95498e-08	5.25431e-08	4.84279e-08
Land	CHN	3.84598e-07	3.60694e-07	3.16931e-07	2.9661e-07	2.82283e-07	2.50333e-07	2.12786e-07	1.97103e-07	1.83064e-07	1.7396e-07	1.60631e-07	1.54774e-07	1.46331e-07	1.42324e-07	1.39222e-07	1.36865e-07	1.29705e-07	1.21037e-07	1.20736e-07	1.2276e-07	1.23551e-07
Land	CAN	1.38031e-07	1.15215e-07	1.24628e-07	1.39129e-07	1.29687e-07	1.36849e-07	1.12223e-07	1.14784e-07	9.5424e-08	1.09617e-07	1.08065e-07	1.03808e-07	1.02671e-07	9.64526e-08	9.09238e-08	9.4461e-08	8.91561e-08	9.22061e-08	8.43251e-08	8.74434e-08	9.01097e-08
Land	KOR	1.07044e-07	1.01401e-07	1.04861e-07	1.01024e-07	1.03576e-07	1.06087e-07	1.05037e-07	9.90135e-08	9.70501e-08	7.66252e-08	9.29347e-08	9.67371e-08	9.16802e-08	9.03691e-08	8.26637e-08	7.8186e-08	7.36836e-08	7.60141e-08	7.10616e-08	6.5128e-08	6.00566e-08
Land	BRA	4.29188e-07	3.93284e-07	3.89295e-07	3.78586e-07	3.19016e-07	3.1865e-07	3.00021e-07	2.76357e-07	2.65891e-07	2.67207e-07	2.47122e-07	2.38171e-07	2.25093e-07	2.17282e-07	2.13966e-07	2.15639e-07	2.40206e-07	2.31224e-07	2.12036e-07	2.0126e-07	1.87925e-07
Land	IND	3.86233e-07	3.69162e-07	3.50611e-07	3.32433e-07	3.03477e-07	2.80525e-07	2.63656e-07	2.42187e-07	2.11077e-07	2.07197e-07	1.84638e-07	1.6949e-07	1.5436e-07	1.35425e-07	1.37192e-07	1.32964e-07	1.30673e-07	1.21365e-07	1.10693e-07	1.08076e-07	1.12307e-07
Land	MEX	2.24675e-07	2.34336e-07	2.25881e-07	2.19665e-07	2.09631e-07	2.10757e-07	1.97346e-07	1.94152e-07	1.92468e-07	1.93768e-07	1.69924e-07	1.6751e-07	1.59274e-07	1.57638e-07	1.49258e-07	1.54746e-07	1.36043e-07	1.39738e-07	1.34386e-07	1.28458e-07	1.24902e-07
Land	RUS	3.44193e-07	3.62792e-07	3.07067e-07	2.47614e-07	3.03738e-07	2.4631e-07	2.44957e-07	2.03802e-07	2.00699e-07	1.94104e-07	1.98017e-07	1.85814e-07	1.67957e-07	1.81804e-07	1.57906e-07	1.50978e-07	1.23119e-07	1.6449e-07	1.57907e-07	1.61048e-07	1.608e-07
Land	AUS	3.85642e-07	4.21267e-07	4.03576e-07	3.98268e-07	3.3068e-07	3.24168e-07	3.23507e-07	2.76187e-07	2.1461e-07	2.57745e-07	1.58216e-07	1.91858e-07	1.95972e-07	1.81189e-07	1.72364e-07	1.5697e-07	1.18421e-07	1.56395e-07	1.13292e-07	8.18451e-08	1.14833e-07
Land	CHE	7.1877e-08	6.59637e-08	6.37376e-08	7.76621e-08	6.47297e-08	6.10389e-08	5.31281e-08	5.37774e-08	5.7896e-08	6.19088e-08	5.48407e-08	6.39437e-08	5.55211e-08	5.81944e-08	5.29434e-08	5.54498e-08	5.40091e-08	5.60174e-08	5.00147e-08	5.28646e-08	5.79827e-08
Land	TUR	2.56621e-07	2.50991e-07	2.53163e-07	2.45267e-07	1.94746e-07	1.8444e-07	1.75758e-07	1.75242e-07	1.85078e-07	1.57069e-07	1.80369e-07	1.67787e-07	1.53949e-07	1.41107e-07	1.32969e-07	1.24969e-07	1.06678e-07	1.06432e-07	1.00308e-07	8.65605e-08	8.48248e-08
Land	TWN	1.0031e-05	6.74327e-06	6.87576e-06	6.64398e-06	6.50526e-06	6.74407e-06	5.60285e-06	4.51682e-06	4.58548e-06	3.86211e-06	4.08815e-06	3.26967e-06	2.5994e-06	3.03869e-06	2.82936e-06	2.45376e-06	1.8227e-06	1.82999e-06	1.77449e-06	1.47545e-06	1.30692e-06
Land	NOR	4.53022e-08	4.64583e-08	4.86948e-08	5.0011e-08	4.51298e-08	4.50175e-08	4.75296e-08	4.82844e-08	5.17936e-08	4.62967e-08	5.08027e-08	5.50859e-08	5.15398e-08	5.00294e-08	4.22836e-08	4.30321e-08	3.98972e-08	4.29515e-08	3.98683e-08	4.19169e-08	3.64831e-08
Land	IDN	1.26885e-07	1.26513e-07	1.23226e-07	1.2992e-07	1.30337e-07	1.18966e-07	1.22519e-07	1.15044e-07	1.157e-07	1.01014e-07	1.19917e-07	1.18863e-07	9.97745e-08	9.3965e-08	9.89902e-08	8.95809e-08	8.11001e-08	7.78648e-08	8.23039e-08	6.96664e-08	6.75089e-08
Land	ZAF	1.70001e-07	1.50073e-07	1.43029e-07	1.54273e-07	1.5035e-07	1.42083e-07	1.43266e-07	1.40648e-07	1.25909e-07	1.3428e-07	1.25323e-07	1.19554e-07	1.11816e-07	1.06836e-07	9.91855e-08	1.01026e-07	8.47465e-08	9.80411e-08	9.08205e-08	8.84677e-08	8.85117e-08
Land	WWA	4.07126e-07	3.6301e-07	3.73126e-07	3.36388e-07	3.12695e-07	2.90815e-07	2.61859e-07	2.49795e-07	2.52998e-07	2.76397e-07	2.58154e-07	2.14752e-07	2.28065e-07	2.21845e-07	1.98347e-07	1.90771e-07	2.21635e-07	1.74612e-07	1.8447e-07	1.64955e-07	1.8201e-07
Land	WWL	3.92368e-07	4.34263e-07	4.12283e-07	3.90564e-07	3.52729e-07	3.41733e-07	3.59013e-07	3.69594e-07	3.6418e-07	3.59618e-07	3.32993e-07	3.03498e-07	3.09851e-07	3.01168e-07	2.9819e-07	2.6322e-07	2.38899e-07	2.2942e-07	1.89948e-07	1.84264e-07	2.20689e-07
Land	WWE	5.05325e-07	4.94371e-07	3.79914e-07	4.345e-07	3.18189e-07	2.72e-07	2.77736e-07	2.58455e-07	1.92647e-07	1.96811e-07	1.84832e-07	1.53722e-07	1.40075e-07	1.59433e-07	1.5131e-07	1.59836e-07	1.74287e-07	1.68117e-07	1.56907e-07	1.66889e-07	1.63596e-07
Land	WWF	8.58742e-07	8.51849e-07	8.2636e-07	7.89708e-07	7.38035e-07	7.00463e-07	6.47345e-07	6.40753e-07	5.92247e-07	5.72762e-07	5.56064e-07	5.63408e-07	4.9927e-07	4.93704e-07	4.71998e-07	4.57953e-07	4.33709e-07	4.05481e-07	3.87109e-07	3.78673e-07	3.86281e-07
Land	WWM	1.26285e-07	1.27068e-07	1.31046e-07	1.27434e-07	1.13542e-07	1.28764e-07	1.25335e-07	1.31711e-07	1.48933e-07	1.79878e-07	1.6612e-07	1.59923e-07	1.75757e-07	1.55213e-07	1.63092e-07	1.58094e-07	1.36976e-07	1.40734e-07	1.40031e-07	1.41311e-07	1.35314e-07
Land	Advanced	1.26001e-07	1.20344e-07	1.21239e-07	1.1945e-07	1.14564e-07	1.13267e-07	1.07794e-07	9.89216e-08	9.70571e-08	9.48725e-08	8.95307e-08	9.05913e-08	8.65922e-08	8.22546e-08	7.95225e-08	7.72483e-08	7.33616e-08	7.44617e-08	7.08717e-08	6.76126e-08	6.98818e-08
Land	EmergingDeveloping	3.50344e-07	3.4351e-07	3.25265e-07	3.05985e-07	2.86057e-07	2.67116e-07	2.49841e-07	2.37113e-07	2.26766e-07	2.27175e-07	2.14335e-07	2.00255e-07	1.92205e-07	1.85946e-07	1.78534e-07	1.71655e-07	1.65526e-07	1.55962e-07	1.49887e-07	1.45477e-07	1.49025e-07
Land	Global	2.24771e-07	2.19183e-07	2.13038e-07	2.05412e-07	1.95385e-07	1.87021e-07	1.775e-07	1.68656e-07	1.63796e-07	1.65277e-07	1.57611e-07	1.50651e-07	1.4603e-07	1.41195e-07	1.36586e-07	1.32156e-07	1.26722e-07	1.22146e-07	1.17634e-07	1.14226e-07	1.17491e-07
Nitrogen	AUT	0.000417788	0.000441811	0.00046802	0.000420967	0.000394102	0.000361878	0.000369272	0.000372322	0.000388335	0.000359005	0.000361173	0.000388813	0.00037421	0.000404562	0.000450898	0.000418648	0.000388764	0.000595313	0.000366877	0.000554505	0.000498046
Nitrogen	BEL	0.000620412	0.000601216	0.000588314	0.00064013	0.000646451	0.00057359	0.00059148	0.000573999	0.000632904	0.000613748	0.000535002	0.000434379	0.000450219	0.000469651	0.000506501	0.0004208	0.000434692	0.000481514	0.000450732	0.000405591	0.000428222
Nitrogen	BGR	0.00139485	0.00163005	0.00243779	0.00260941	0.00185184	0.00136655	0.000977603	0.00120981	0.00105993	0.0014462	0.000827182	0.000956944	0.000906258	0.000856063	0.000752427	0.000768291	0.000707189	0.000724415	0.000607836	0.000650313	0.000724865
Nitrogen	CYP	0.000291814	0.000258694	0.000262912	0.000290352	0.000283611	0.00021625	0.000206121	0.000198281	0.000232609	0.000231362	0.000261943	0.000222505	0.000268141	0.00021331	0.000201113	0.000254532	0.000254328	0.000351903	0.000326397	0.000473757	0.000512327
Nitrogen	CZE	0.000818876	0.000888704	0.000591517	0.000654897	0.000591784	0.00053156	0.00055051	0.000534383	0.000520867	0.000515346	0.000497422	0.000493306	0.000599541	0.000551252	0.000691632	0.000571007	0.000513181	0.000534716	0.000477928	0.000453805	0.000459294
Nitrogen	DEU	0.000547364	0.000525073	0.000497318	0.000568184	0.000573111	0.000535823	0.000497156	0.000534284	0.000488569	0.000485025	0.000490863	0.000484104	0.000463908	0.000466592	0.000488554	0.000440896	0.000404018	0.000426831	0.000386685	0.000425229	0.000401522
Nitrogen	DNK	0.000801601	0.000715639	0.000562849	0.000503322	0.000607173	0.000500065	0.000473523	0.000534462	0.00050709	0.000482338	0.000406495	0.000518666	0.000547238	0.000463267	0.00054816	0.000522958	0.000464083	0.000562055	0.000453801	0.000491896	0.000557932
Nitrogen	EST	0.000801616	0.000698269	0.000617205	0.000746357	0.000720797	0.000528704	0.000573926	0.000444885	0.000673244	0.000522884	0.000423789	0.000397759	0.000408416	0.000494184	0.000467803	0.000557177	0.000426751	0.000520801	0.000555254	0.000404691	0.000803309
Nitrogen	ESP	0.000737885	0.000754612	0.000727644	0.000766775	0.00071895	0.000640048	0.000617375	0.000622463	0.000527602	0.000517476	0.000578258	0.000552263	0.000532296	0.000544132	0.000613415	0.000567953	0.000495083	0.000525969	0.000514772	0.000457335	0.000562102
Nitrogen	FIN	0.000690055	0.000623332	0.000572686	0.000682202	0.00064926	0.000609019	0.00059649	0.000569585	0.000575781	0.000608591	0.000554133	0.000538138	0.000555288	0.000581442	0.000566498	0.000557575	0.000516593	0.000526491	0.000505943	0.000514579	0.000574363
Nitrogen	FRA	0.000704562	0.000731212	0.000671655	0.000694641	0.000672031	0.000636847	0.000635513	0.00065203	0.000524828	0.000499887	0.00049617	0.000475441	0.000637334	0.000505158	0.000496943	0.000495112	0.000509426	0.000519586	0.00045026	0.00042653	0.000466996
Nitrogen	GRC	0.00100162	0.000889314	0.00081241	0.000837646	0.000836182	0.000726102	0.00064559	0.000715194	0.000674506	0.000613167	0.000685697	0.00071456	0.000698942	0.000765481	0.000651913	0.00060451	0.000567654	0.000621879	0.000644115	0.000606856	0.000721295
Nitrogen	HRV	0.000150646	0.000133463	0.000144773	0.000177341	0.000159542	0.000149173	0.00139901	0.00137232	0.00174606	0.000705603	0.000864713	0.000992384	0.000772653	0.000615639	0.000581445	0.000623304	0.000482856	0.000614199	0.000594171	0.000575643	0.000690479
Nitrogen	HUN	0.0012823	0.00112053	0.00104379	0.00087576	0.000987189	0.000845716	0.000706411	0.00081078	0.000798951	0.000652177	0.000534003	0.000706581	0.000647182	0.000768894	0.000706951	0.000604416	0.000706407	0.00067639	0.000644611	0.000593079	0.000682092
Nitrogen	IRL	0.00125324	0.0012971	0.00136882	0.00136471	0.000993169	0.000926057	0.000864547	0.000958084	0.000862538	0.00103792	0.000779342	0.000662465	0.000570491	0.000694742	0.000838244	0.000523331	0.000653128	0.000635001	0.000603426	0.000671549	0.000434101
Nitrogen	ITA	0.000434694	0.000423302	0.000458136	0.000484295	0.000489587	0.0004507	0.000478625	0.000466919	0.000413661	0.000377543	0.000375193	0.00037917	0.000378249	0.000375	0.000382399	0.000389224	0.000365509	0.000399187	0.000388012	0.000352952	0.000381723
Nitrogen	LTU	0.00179246	0.00171998	0.00184583	0.00164894	0.0015835	0.00135022	0.00129104	0.000983479	0.00102497	0.000991867	0.000886636	0.000876111	0.00111282	0.000856661	0.000874766	0.000831277	0.00134635	0.000917962	0.000794842	0.000912958	0.00104489
Nitrogen	LUX	0.000559633	0.000568567	0.000442238	0.000547773	0.000578084	0.000556344	0.000523024	0.000454228	0.000496075	0.000467324	0.000454436	0.000491391	0.000476933	0.000611958	0.000637924	0.000551673	0.000516676	0.000512368	0.00043439	0.00056001	0.000643302
Nitrogen	LVA	0.000889801	0.000901321	0.000732888	0.000931374	0.000843144	0.0008886	0.000867215	0.000711607	0.000675452	0.000736496	0.00074681	0.0008338	0.000851345	0.000928762	0.000947039	0.000724673	0.000343168	0.000771104	0.000676716	0.000760222	0.00034602
Nitrogen	MLT	0.000175881	7.98926e-05	6.20072e-05	5.91768e-05	6.32579e-05	6.60636e-05	6.48069e-05	5.48545e-05	3.49469e-05	3.51386e-05	4.04718e-05	3.52897e-05	3.90999e-05	3.53873e-05	3.09919e-05	5.81348e-05	0.000102857	0.000123618	0.000182211	0.000382217	0.000251862
Nitrogen	NLD	0.000658928	0.000657945	0.000650913	0.000670343	0.000665132	0.000573703	0.00055312	0.000573006	0.000513744	0.000520681	0.000372757	0.00037569	0.00040773	0.000386844	0.000428322	0.000569028	0.000390145	0.000450289	0.000401538	0.000395776	0.000427318
Nitrogen	POL	0.00123599	0.00122342	0.00110139	0.00112609	0.00104286	0.00114092	0.00111233	0.00115923	0.00108605	0.000926575	0.00101053	0.00094147	0.00026021	0.000851237	0.000238364	0.000744517	0.000253063	0.00041153	0.000573159	0.000359945	0.000398346
Nitrogen	PRT	0.000500029	0.000481721	0.000513249	0.000542467	0.0004683	0.000431959	0.000425216	0.000505114	0.0004857	0.000471159	0.000493732	0.000462491	0.000442941	0.000463463	0.000535504	0.000494469	0.000415403	0.000430095	0.000416041	0.000407686	0.000445359
Nitrogen	ROM	0.000758289	0.0007884	0.000672994	0.000726436	0.000718126	0.000727089	0.000590125	0.00061452	0.000556539	0.000595848	0.000600346	0.000617024	0.000461304	0.000152868	0.000508386	0.00048196	0.000446694	0.000491476	0.000489662	0.000475969	0.000557015
Nitrogen	SWE	0.000568523	0.000545152	0.000532623	0.000541435	0.000517138	0.000465323	0.000453529	0.000483282	0.000501238	0.000462224	0.000507424	0.000500667	0.000469573	0.000503955	0.000504875	0.000487899	0.000444156	0.000483574	0.000432055	0.000421386	0.000463827
Nitrogen	SVN	0.000827433	0.000754164	0.000708847	0.000738318	0.000663778	0.000576386	0.000556638	0.000545834	0.000504992	0.000528242	0.000524428	0.000526296	0.000485781	0.000520616	0.000508449	0.00047988	0.000360438	0.000406177	0.000360606	0.000406341	0.000466031
Nitrogen	SVK	0.000914236	0.000764846	0.000813589	0.000738204	0.000717646	0.000619368	0.00058451	0.000557331	0.000577432	0.000608099	0.0005188	0.000508104	0.000448411	0.000572908	0.00068385	0.000533953	0.000512042	0.000337538	0.000884442	0.000919328	0.00101824
Nitrogen	GBR	0.000725338	0.000762378	0.000752164	0.000724568	0.000732222	0.000713917	0.000685004	0.00064962	0.000608281	0.000598524	0.000561334	0.000561394	0.000573218	0.000551467	0.000610705	0.000638303	0.000498367	0.000535155	0.000518648	0.000501662	0.00052526
Nitrogen	USA	0.000678537	0.000693682	0.000732427	0.000732724	0.000662629	0.000633099	0.000663054	0.000597113	0.000529328	0.00056284	0.000568945	0.000590012	0.00058559	0.000573245	0.00058171	0.000561882	0.00050738	0.000502632	0.000477586	0.000481939	0.000501308
Nitrogen	JPN	0.00044652	0.000469902	0.000427862	0.000453816	0.000437722	0.000444314	0.000438399	0.000447671	0.000442055	0.000413755	0.000420043	0.000464368	0.000495877	0.000476255	0.00102348	0.000780466	0.00028992	0.000324375	0.000304791	0.000325294	0.000400608
Nitrogen	CHN	0.00388148	0.00365883	0.00368047	0.00339268	0.00334819	0.00304616	0.00275163	0.00243344	0.00232677	0.0022034	0.00204483	0.00195727	0.00180571	0.00165046	0.00123784	0.00119665	0.00144701	0.00135073	0.00123971	0.00112451	0.00107156
Nitrogen	CAN	0.00067773	0.000667231	0.000708069	0.000790515	0.000693498	0.000762841	0.000615482	0.000816948	0.000711452	0.000780117	0.000823307	0.000891362	0.000951399	0.000864148	0.000831265	0.000815775	0.000719443	0.000718918	0.000726725	0.000701794	0.000807406
Nitrogen	KOR	0.000729248	0.000738077	0.000864708	0.000785492	0.000736332	0.000757561	0.000694192	0.000826004	0.000645327	0.000497857	0.000535154	0.000606872	0.000664001	0.000718054	0.00112455	0.000926441	0.000422456	0.000461303	0.000452199	0.000434166	0.000502502
Nitrogen	BRA	0.00068858	0.000645935	0.000738321	0.000864173	0.000821529	0.000695741	0.000724305	0.000862864	0.000764694	0.000663507	0.000793427	0.000908108	0.000763007	0.000874519	0.00100486	0.000752389	0.000835363	0.00098372	0.000941333	0.000969913	0.00109367
Nitrogen	IND	0.00321924	0.0032055	0.0028393	0.00280577	0.00272003	0.00273172	0.00273353	0.00264801	0.00256911	0.00253969	0.00245746	0.00242546	0.00220376	0.00203764	0.00199772	0.00192897	0.00171811	0.00165928	0.0015843	0.00163196	0.00186374
Nitrogen	MEX	0.000823132	0.000906281	0.000766131	0.000748935	0.000629726	0.000750689	0.000668453	0.000702071	0.000603099	0.000656722	0.000598853	0.000710671	0.000714258	0.000725638	0.000709342	0.000613238	0.000647563	0.000644187	0.000581157	0.000538218	0.000614392
Nitrogen	RUS	0.000362118	0.000359782	0.000239825	0.000233425	0.000315393	0.000260892	0.000294241	0.000287115	0.000309156	0.000307673	0.000341395	0.00033978	0.000326246	0.00037224	0.000328477	0.000281401	0.000277742	0.000307841	0.000276437	0.000306975	0.00032503
Nitrogen	AUS	0.000702903	0.000820747	0.000750806	0.000859584	0.000766204	0.000685043	0.000687185	0.000687509	0.000528427	0.000582058	0.00056543	0.000631765	0.000596062	0.000617974	0.00067303	0.000682503	0.000504376	0.000561346	0.000452476	0.000440037	0.000590805
Nitrogen	CHE	0.000289722	0.00030346	0.000289072	0.000308762	0.00028175	0.000274406	0.000258151	0.000254638	0.000276256	0.000294766	0.000289595	0.000335482	0.000321447	0.000326283	0.000319325	0.000332361	0.00027544	0.000320627	0.000250886	0.000280358	0.000322742
Nitrogen	TUR	0.00131129	0.00113587	0.00120849	0.00122964	0.00107713	0.00103683	0.00100633	0.000952255	0.000846356	0.000974002	0.00105306	0.000864115	0.000874837	0.000840071	0.000780775	0.000709015	0.00080042	0.000724316	0.000587744	0.00064638	0.000784863
Nitrogen	TWN	0.436416	0.187286	0.112833	0.0705267	0.0506794	0.0442071	0.0379896	0.0328053	0.0300366	0.0273846	0.0317574	0.0252579	0.0217512	0.0256998	0.0235587	0.021279	0.0150282	0.0151783	0.0131213	0.0131112	0.0120052
Nitrogen	NOR	0.000379494	0.000401814	0.000428411	0.000439181	0.000352912	0.000353813	0.000383888	0.00039051	0.000411182	0.000365784	0.000363126	0.000408894	0.000376957	0.00040857	0.000378746	0.000403487	0.000321763	0.000361337	0.000315564	0.000373377	0.000358747
Nitrogen	IDN	0.00112889	0.00106004	0.001082	0.00111288	0.00116709	0.0011149	0.00115152	0.00110417	0.00111552	0.00108462	0.00110277	0.0011252	0.00105146	0.000945402	0.000964513	0.00089243	0.000862755	0.000802761	0.000889254	0.00075845	0.000921145
Nitrogen	ZAF	0.000767631	0.000610163	0.000707289	0.000710134	0.00068579	0.000529971	0.000619858	0.000671011	0.000540603	0.000538419	0.000504776	0.000487427	0.000531901	0.000492176	0.000444383	0.000421397	0.000356075	0.000506996	0.00049253	0.000538004	0.000606412
Nitrogen	WWA	0.00150605	0.00136241	0.00145508	0.00139033	0.00133891	0.00126466	0.00104107	0.00103081	0.000998421	0.00129417	0.00119921	0.0010389	0.00106542	0.00110484	0.00107049	0.00111937	0.00112128	0.000922856	0.00097367	0.000810389	0.0010185
Nitrogen	WWL	0.000674774	0.000719296	0.000676418	0.000669336	0.000655972	0.000576317	0.000648447	0.000706424	0.000688279	0.000633171	0.000676671	0.000654143	0.000662008	0.000659284	0.000723445	0.000639564	0.00058288	0.000616948	0.000562809	0.00055107	0.000713207
Nitrogen	WWE	0.000768477	0.000806787	0.000636061	0.000786012	0.000620828	0.000582752	0.000825959	0.00085841	0.000767855	0.000782316	0.000713956	0.000713701	0.000703944	0.000855554	0.000700646	0.000780004	0.000840028	0.000817467	0.000779843	0.000804135	0.000910543
Nitrogen	WWF	0.000596244	0.000583901	0.000756027	0.000656151	0.000665979	0.000633269	0.000634293	0.000631962	0.000606067	0.000584957	0.000708029	0.000696247	0.000671602	0.00068815	0.000696373	0.000649266	0.000664571	0.000715578	0.000635892	0.000642335	0.00074846
Nitrogen	WWM	0.000756132	0.000813788	0.000759788	0.000656251	0.000630199	0.000631556	0.000709316	0.000707272	0.000749456	0.000753173	0.000716251	0.000706878	0.000762152	0.000772592	0.000810979	0.000717509	0.00070204	0.000669151	0.000635291	0.000669378	0.000721403
Nitrogen	Advanced	0.000696586	0.000689146	0.00068818	0.000704815	0.000661549	0.000634617	0.000632207	0.000627165	0.000566584	0.000564838	0.000564248	0.000581353	0.000578369	0.000574228	0.000651159	0.000615576	0.000485009	0.000507544	0.000481986	0.000480329	0.000516565
Nitrogen	EmergingDeveloping	0.00150117	0.00147541	0.00146595	0.00141928	0.0013969	0.00133857	0.0012961	0.00125251	0.00121529	0.00125556	0.00122961	0.00119903	0.00114613	0.001117	0.00101816	0.000975998	0.00103382	0.000990193	0.000942559	0.000900282	0.000980314
Nitrogen	Global	0.00105113	0.00103738	0.00103813	0.00103436	0.0010083	0.000972085	0.000957993	0.000942903	0.000900283	0.000932537	0.000927596	0.000919512	0.000898185	0.000882871	0.000863525	0.000826194	0.000802609	0.000789788	0.000754462	0.000731733	0.000795385
Phosphorus	AUT	7.56836e-05	7.63364e-05	7.38531e-05	7.33003e-05	6.40717e-05	5.66747e-05	5.52008e-05	5.48626e-05	5.18024e-05	3.9626e-05	4.57184e-05	4.80875e-05	4.80019e-05	5.07837e-05	5.21661e-05	5.15233e-05	4.80682e-05	5.14483e-05	4.5376e-05	4.31792e-05	4.95767e-05
Phosphorus	BEL	7.85069e-05	7.80793e-05	7.38539e-05	7.92206e-05	8.38305e-05	7.00461e-05	7.59032e-05	6.74723e-05	5.31937e-05	5.45415e-05	5.40099e-05	4.34885e-05	4.98892e-05	4.99003e-05	4.82611e-05	4.17325e-05	3.99655e-05	4.65326e-05	4.25236e-05	4.09658e-05	4.62895e-05
Phosphorus	BGR	3.59772e-05	0.000123061	0.000355457	0.000625527	0.000104854	0.000140855	0.000224106	0.000297623	0.000294426	0.000134236	7.86667e-05	0.000120141	0.000123972	0.000135652	0.000129355	0.000143568	0.000152639	0.000128471	0.00014062	0.000151366	0.000171391
Phosphorus	CYP	7.07497e-05	7.56462e-05	8.38592e-05	9.40942e-05	7.83259e-05	6.75291e-05	6.50148e-05	6.08988e-05	3.73017e-05	6.85398e-05	6.92488e-05	3.70739e-05	6.40942e-05	5.75469e-05	5.0245e-05	5.87991e-05	5.99869e-05	8.30154e-05	7.02974e-05	9.48327e-05	0.000115471
Phosphorus	CZE	7.34934e-05	8.45446e-05	6.31783e-05	7.01234e-05	6.44027e-05	6.00076e-05	6.66183e-05	6.35941e-05	4.82121e-05	4.79733e-05	5.0471e-05	5.50733e-05	5.44333e-05	5.29969e-05	5.07068e-05	5.23682e-05	4.40218e-05	5.55702e-05	4.78944e-05	5.02137e-05	5.28836e-05
Phosphorus	DEU	6.65961e-05	5.53636e-05	5.63786e-05	5.84206e-05	6.37364e-05	5.61635e-05	5.38297e-05	5.60637e-05	3.95873e-05	4.47816e-05	5.02512e-05	4.55347e-05	4.9477e-05	4.78769e-05	4.89495e-05	4.6397e-05	4.12777e-05	4.23991e-05	3.71101e-05	4.10059e-05	3.94903e-05
Phosphorus	DNK	6.95724e-05	6.93343e-05	5.6058e-05	5.42976e-05	7.79353e-05	6.50752e-05	5.40582e-05	6.44068e-05	4.81873e-05	4.25877e-05	4.7671e-05	5.61923e-05	5.52319e-05	5.57242e-05	4.91266e-05	5.56995e-05	4.61645e-05	5.44052e-05	4.50845e-05	4.84427e-05	5.1622e-05
Phosphorus	EST	9.38734e-05	6.75938e-05	7.06845e-05	9.35095e-05	0.00010086	8.12513e-05	9.49051e-05	6.08285e-05	9.02605e-05	5.45708e-05	5.2796e-05	6.26763e-05	6.33491e-05	8.08095e-05	7.01053e-05	7.27651e-05	5.43431e-05	8.621e-05	7.1021e-05	6.67321e-05	0.000102663
Phosphorus	ESP	0.000156292	0.000158451	0.000155593	0.000154025	0.000150205	0.000126013	0.000111287	0.000128828	7.33591e-05	6.74858e-05	8.35654e-05	8.65733e-05	9.06209e-05	9.68378e-05	9.03446e-05	8.56736e-05	8.25082e-05	8.03839e-05	7.77927e-05	8.05042e-05	9.5311e-05
Phosphorus	FIN	0.000102105	8.00216e-05	8.60214e-05	9.72019e-05	9.09679e-05	8.0619e-05	7.98691e-05	7.48004e-05	5.28928e-05	6.72453e-05	5.49947e-05	5.55856e-05	6.02937e-05	6.13904e-05	6.32951e-05	5.95322e-05	5.01358e-05	5.9312e-05	5.34709e-05	5.51604e-05	5.24838e-05
Phosphorus	FRA	0.000122523	0.000112528	0.000103982	0.000104958	0.000100071	8.87658e-05	8.48593e-05	8.71576e-05	4.92637e-05	3.64125e-05	4.74422e-05	4.29735e-05	6.20518e-05	6.44434e-05	6.00063e-05	5.79324e-05	5.42056e-05	5.76931e-05	5.25045e-05	5.12318e-05	5.90652e-05
Phosphorus	GRC	0.000174261	0.000169099	0.000138669	0.000152193	0.000134226	0.000117619	0.000107928	0.000102021	8.80454e-05	7.86654e-05	9.73748e-05	9.15826e-05	9.77465e-05	0.000104914	8.94904e-05	8.38591e-05	7.84926e-05	8.62797e-05	9.19504e-05	8.86987e-05	0.000103986
Phosphorus	HRV	2.89824e-05	2.89925e-05	2.81004e-05	3.19887e-05	3.24797e-05	2.8241e-05	0.000273888	0.000228824	0.000279074	0.000150681	0.000317584	0.000294565	0.000117102	0.000119417	0.000140764	0.000108192	5.16891e-05	0.000118312	0.000111946	0.000114551	0.000139288
Phosphorus	HUN	9.74053e-05	0.000112665	0.000120312	0.000115388	0.000127894	9.87137e-05	0.000103283	0.000120485	8.49734e-05	6.10028e-05	5.90023e-05	6.4123e-05	7.37448e-05	9.43902e-05	8.51758e-05	8.18905e-05	8.79991e-05	0.000112864	9.2244e-05	9.06142e-05	0.000100165
Phosphorus	IRL	0.000163238	0.00018478	0.000190322	0.000172182	0.00013346	0.000120248	0.000107327	0.000116574	8.37063e-05	0.00010588	8.97155e-05	7.24841e-05	6.50655e-05	8.59535e-05	7.64358e-05	5.55842e-05	6.57089e-05	7.14737e-05	5.83806e-05	7.5496e-05	4.25156e-05
Phosphorus	ITA	9.52791e-05	7.4469e-05	7.06997e-05	7.32269e-05	7.5798e-05	6.67726e-05	6.82122e-05	6.75499e-05	4.96785e-05	4.58522e-05	5.17861e-05	5.14561e-05	5.21915e-05	5.01843e-05	4.86647e-05	4.85448e-05	4.6305e-05	4.99856e-05	4.66398e-05	4.55452e-05	5.7083e-05
Phosphorus	LTU	0.000162415	0.000147881	0.000209966	0.000197377	0.000194975	0.000171781	0.000188648	0.000115714	9.88809e-05	0.000104667	8.96909e-05	9.24683e-05	0.000133073	0.000126079	0.00014597	0.000154208	0.000154322	0.000145719	0.000131569	0.000139736	0.000155898
Phosphorus	LUX	7.30113e-05	7.38627e-05	5.04266e-05	6.03753e-05	6.65533e-05	6.2794e-05	5.91705e-05	4.57761e-05	4.00619e-05	3.71629e-05	4.59109e-05	4.68384e-05	4.79412e-05	6.45892e-05	6.23605e-05	5.2598e-05	4.16245e-05	4.78772e-05	4.15754e-05	5.10501e-05	5.91493e-05
Phosphorus	LVA	0.000141008	0.000163038	9.75381e-05	0.000106923	0.000175857	0.000145991	0.000133718	9.75917e-05	8.49318e-05	7.78625e-05	9.86879e-05	0.000103258	0.00014007	0.000171411	0.000154924	0.000151374	0.000125706	0.000155719	0.000135498	0.000147803	0.00017109
Phosphorus	MLT	2.64059e-05	1.35691e-05	7.60371e-06	9.6173e-06	1.37329e-05	8.92463e-06	7.50523e-06	7.24009e-06	4.75991e-06	2.02464e-06	3.52463e-06	4.96874e-06	3.48101e-06	3.34504e-06	2.41395e-06	7.26076e-06	1.9362e-05	3.00558e-05	2.84552e-05	8.54386e-05	6.05758e-05
Phosphorus	NLD	8.67066e-05	7.7704e-05	7.80782e-05	8.38149e-05	9.77829e-05	7.43389e-05	7.05323e-05	7.32929e-05	4.96408e-05	4.8335e-05	4.3662e-05	4.36995e-05	4.86817e-05	4.77424e-05	4.77311e-05	5.4635e-05	4.62531e-05	5.44355e-05	4.73959e-05	4.70941e-05	4.94924e-05
Phosphorus	POL	0.000192456	0.000195825	0.000174327	0.000179838	0.000168325	0.000216897	0.00018854	0.000200463	0.000156595	0.00013965	0.000163513	0.000136881	0.000137573	0.000119949	0.000102605	0.000104155	0.000109323	0.000101254	8.97307e-05	9.1349e-05	8.23014e-05
Phosphorus	PRT	0.000108728	0.000110681	0.000105693	0.000108732	9.87115e-05	8.62007e-05	8.85744e-05	0.000108458	7.13031e-05	5.70559e-05	7.59883e-05	5.8664e-05	6.15683e-05	6.98954e-05	6.92948e-05	7.62632e-05	6.3946e-05	6.55177e-05	5.96714e-05	6.11524e-05	6.9389e-05
Phosphorus	ROM	8.18963e-05	0.000109321	9.07524e-05	0.000115589	0.000106063	0.000143228	9.90896e-05	0.000103989	8.98234e-05	9.21029e-05	0.000113316	0.000114867	9.38755e-05	8.01575e-05	9.27503e-05	0.000102924	9.11743e-05	9.85626e-05	0.000116641	0.000123221	0.000124272
Phosphorus	SWE	7.79622e-05	7.21143e-05	6.70963e-05	7.3424e-05	6.98495e-05	6.23181e-05	5.60784e-05	5.59052e-05	5.25836e-05	3.75421e-05	5.16081e-05	5.1289e-05	5.38721e-05	5.77866e-05	5.23578e-05	5.11992e-05	4.6063e-05	5.31445e-05	4.49943e-05	4.79233e-05	5.26971e-05
Phosphorus	SVN	0.000173931	0.000159341	0.000133301	0.000138266	0.000128818	0.000106452	0.000101476	9.57291e-05	8.56421e-05	6.68249e-05	8.05727e-05	7.64024e-05	6.69444e-05	8.43361e-05	7.63248e-05	7.63786e-05	5.05243e-05	6.33345e-05	5.12475e-05	5.63574e-05	6.75508e-05
Phosphorus	SVK	0.000105913	0.000104485	9.07983e-05	8.57275e-05	8.27268e-05	7.99668e-05	8.26737e-05	7.32573e-05	6.10052e-05	6.30214e-05	5.68196e-05	6.42318e-05	6.48139e-05	7.43055e-05	8.0004e-05	7.13736e-05	6.30466e-05	6.98933e-05	7.75095e-05	9.01847e-05	8.4438e-05
Phosphorus	GBR	0.000103863	9.71814e-05	9.94332e-05	9.83062e-05	0.000102394	0.000103471	9.51814e-05	8.07416e-05	6.77176e-05	5.65266e-05	6.36943e-05	5.91929e-05	6.99269e-05	6.43708e-05	6.38492e-05	6.74555e-05	5.92219e-05	5.85283e-05	5.17252e-05	5.176e-05	5.34086e-05
Phosphorus	USA	0.000121515	0.000128414	0.00012391	0.000127803	0.000128755	0.000120179	0.000118812	0.000103795	8.08629e-05	9.90973e-05	0.000101486	9.80617e-05	0.000103024	0.000100188	9.30281e-05	9.44926e-05	9.03545e-05	8.85944e-05	8.26486e-05	8.20891e-05	8.81331e-05
Phosphorus	JPN	0.000113784	0.000106772	9.33301e-05	9.87863e-05	8.85235e-05	8.73631e-05	8.89987e-05	8.5798e-05	6.91314e-05	6.80721e-05	8.12852e-05	8.24507e-05	8.62246e-05	7.71997e-05	7.68463e-05	6.79065e-05	5.84901e-05	6.78932e-05	6.08105e-05	6.4758e-05	6.35396e-05
Phosphorus	CHN	0.000631806	0.000656393	0.000685057	0.00058317	0.000609372	0.000579587	0.000525994	0.000398139	0.000381676	0.000418258	0.000417302	0.000381782	0.000352729	0.000332029	0.000306807	0.000281035	0.000258819	0.000240295	0.000224818	0.000207275	0.000215961
Phosphorus	CAN	0.000111674	0.000106391	0.000111537	0.000146812	0.000117321	0.00012384	0.000114123	0.000131923	0.000120594	0.00011502	0.000130578	0.00015598	0.000154127	0.000160824	0.000149522	0.00015622	0.000146302	0.000159575	0.000161317	0.000144741	0.000172114
Phosphorus	KOR	0.00014067	0.000124792	0.000140158	0.000132422	0.000107816	0.000109448	0.000105776	0.000118414	7.80419e-05	7.75826e-05	9.21587e-05	9.9484e-05	0.000102191	9.86657e-05	8.93572e-05	8.29823e-05	7.60762e-05	8.59298e-05	8.37734e-05	8.33576e-05	6.99217e-05
Phosphorus	BRA	0.000402077	0.000405563	0.00043074	0.000492716	0.000518013	0.000384482	0.000382808	0.000466915	0.000391558	0.000284723	0.000322768	0.000383427	0.000340415	0.000398685	0.000405662	0.000332435	0.000356049	0.00038728	0.000370999	0.000337979	0.000435288
Phosphorus	IND	0.000491198	0.000454639	0.00039295	0.000414244	0.000412847	0.00042627	0.00042161	0.000358382	0.000418566	0.000451239	0.00047433	0.000440176	0.000337039	0.000276569	0.000266186	0.000282676	0.000252654	0.000255414	0.000237895	0.000253535	0.000301456
Phosphorus	MEX	0.000104496	0.000105899	0.000106329	9.91558e-05	9.82047e-05	0.000100325	9.49335e-05	7.96225e-05	5.47348e-05	7.52394e-05	7.30864e-05	6.84133e-05	6.9879e-05	7.63538e-05	8.42164e-05	9.04113e-05	8.6095e-05	7.89459e-05	8.32204e-05	9.00847e-05	6.80158e-05
Phosphorus	RUS	4.42806e-05	4.30678e-05	4.21458e-05	4.19162e-05	4.94391e-05	5.02161e-05	5.56165e-05	5.29475e-05	5.20137e-05	5.08411e-05	6.52993e-05	6.60929e-05	6.56075e-05	6.62272e-05	6.32133e-05	5.15469e-05	5.10617e-05	5.7881e-05	5.46502e-05	5.53043e-05	5.9098e-05
Phosphorus	AUS	0.00016571	0.000218964	0.000269492	0.000314649	0.000327127	0.000319404	0.000303235	0.00029815	0.00022506	0.000194237	0.000223043	0.000233613	0.000233843	0.000206312	0.000213099	0.00022668	0.000200179	0.000236333	0.000187266	0.000181578	0.000201997
Phosphorus	CHE	4.56297e-05	4.70487e-05	4.51921e-05	4.49799e-05	4.39452e-05	3.98733e-05	3.85375e-05	3.66404e-05	3.30168e-05	3.53494e-05	3.97576e-05	4.5678e-05	4.38093e-05	4.8332e-05	4.32951e-05	4.32406e-05	3.92692e-05	4.42467e-05	3.3199e-05	3.89745e-05	4.50655e-05
Phosphorus	TUR	0.000223766	0.000184144	0.000193173	0.000211966	0.000189253	0.000180929	0.000176074	0.000146084	9.90715e-05	0.000162553	0.000174461	0.000138213	0.000123047	0.000129141	0.00011302	0.000111951	0.000143983	0.000129124	9.90231e-05	0.0001045	0.000120755
Phosphorus	TWN	0.0782754	0.0399478	0.0221243	0.0147568	0.0108265	0.00885839	0.00838213	0.00658876	0.0052046	0.00473039	0.00697719	0.00510304	0.00521682	0.00589376	0.00537977	0.00454175	0.00343234	0.00367339	0.00318333	0.00270397	0.0024882
Phosphorus	NOR	5.81595e-05	6.07696e-05	5.96988e-05	6.18906e-05	5.28893e-05	5.00658e-05	5.31192e-05	5.09775e-05	4.50839e-05	4.24945e-05	4.60225e-05	4.45597e-05	4.70993e-05	5.09896e-05	4.33972e-05	4.53235e-05	3.89162e-05	4.61623e-05	3.67157e-05	4.16507e-05	4.27249e-05
Phosphorus	IDN	4.13302e-05	3.79626e-05	4.22429e-05	8.53301e-05	7.69634e-05	5.86343e-05	9.18628e-05	8.76437e-05	7.62384e-05	9.61306e-05	0.000103458	0.000113834	0.000221476	0.000160573	0.000198864	0.000208608	0.000184552	0.00021285	0.000194785	9.98348e-05	9.01827e-05
Phosphorus	ZAF	0.000149339	0.00017921	0.000156401	0.000155258	0.000164271	0.000103445	0.000125555	9.69751e-05	9.14836e-05	0.000101838	0.000109237	0.000108078	0.000114209	0.000147502	0.000129482	0.000127375	0.00010726	0.000134166	0.000145593	0.000153067	0.000145584
Phosphorus	WWA	0.000278021	0.000250581	0.000260216	0.000237122	0.000232872	0.000234416	0.000208434	0.000218586	0.000160308	0.000201403	0.000194536	0.000187187	0.000173742	0.000184729	0.000183232	0.000164045	0.00019665	0.000156158	0.000177141	0.000134342	0.000179308
Phosphorus	WWL	0.000146808	0.000172071	0.000141837	0.000153676	0.000159125	0.000154086	0.000180401	0.000212341	0.000148355	0.000124785	0.000183944	0.000184205	0.000187496	0.00019412	0.000185592	0.000152435	0.000138193	0.000139764	0.000126642	0.000116325	0.00015909
Phosphorus	WWE	8.01687e-05	7.32142e-05	6.43343e-05	8.21093e-05	8.21249e-05	9.40677e-05	0.000134361	0.000138923	0.00012004	0.000122709	0.000114178	0.000125902	0.000123194	0.000128196	0.000108393	0.000115013	0.00011618	0.000123536	0.000118544	0.000111985	0.000141667
Phosphorus	WWF	0.000129555	0.000124026	0.00014282	0.000128463	0.000111126	0.000100317	0.000108656	0.000120805	9.02257e-05	0.000102639	0.000119207	0.000119413	0.000135543	0.000125055	0.000118217	0.000119041	0.000114731	0.000122793	9.9227e-05	0.000111329	0.000116203
Phosphorus	WWM	0.00013132	0.000128176	0.000120752	0.000106521	0.000110846	0.000113321	0.000128029	0.000139626	9.92376e-05	0.000118875	0.000121646	0.000125161	0.000101225	0.000112628	0.000112446	0.00010976	9.1361e-05	0.00010392	9.03492e-05	0.000101611	0.000125679
Phosphorus	Advanced	0.000121469	0.000117799	0.000114219	0.00011975	0.000116145	0.000110105	0.000107431	0.000103078	7.90253e-05	8.19898e-05	9.01091e-05	8.88192e-05	9.35779e-05	9.12601e-05	8.68172e-05	8.66856e-05	8.05962e-05	8.41393e-05	7.76498e-05	7.82406e-05	8.34214e-05
Phosphorus	EmergingDeveloping	0.000263239	0.000264406	0.000267582	0.000256762	0.000263461	0.000252949	0.000248793	0.000228609	0.000207419	0.000228551	0.00024202	0.000234505	0.000216873	0.000211587	0.000204985	0.000192618	0.000186295	0.000181753	0.000172746	0.000161121	0.000184328
Phosphorus	Global	0.00018394	0.00018273	0.000183223	0.000182928	0.000185592	0.000178583	0.000176801	0.000166437	0.000145103	0.000159938	0.000172889	0.000168663	0.000162947	0.000159653	0.000154901	0.000148296	0.000141803	0.000141262	0.00013394	0.000127857	0.00014413
Water	AUT	4.98721e-09	4.99905e-09	4.49968e-09	4.03091e-09	4.56899e-09	4.41868e-09	4.21062e-09	3.89989e-09	3.65955e-09	3.72365e-09	2.86061e-09	2.8726e-09	2.98044e-09	2.5396e-09	2.80271e-09	2.48059e-09	2.36668e-09	2.48199e-09	2.38576e-09	2.56734e-09	2.45333e-09
Water	BEL	1.1389e-08	1.06235e-08	8.96102e-09	1.05347e-08	1.02762e-08	9.14632e-09	9.39618e-09	8.75835e-09	1.04514e-08	1.19391e-08	5.46821e-09	4.87339e-09	5.36177e-09	4.89815e-09	5.3081e-09	4.15255e-09	4.61874e-09	4.7257e-09	4.23043e-09	3.709e-09	3.78834e-09
Water	BGR	9.95343e-09	7.43706e-09	6.0332e-09	7.80415e-09	7.46728e-09	6.56143e-09	5.90763e-09	5.5089e-09	6.48232e-09	6.14457e-09	3.62132e-09	3.59581e-09	4.18324e-09	2.91944e-09	3.11642e-09	3.07699e-09	2.971e-09	2.96682e-09	2.39172e-09	2.77859e-09	2.8071e-09
Water	CYP	1.66311e-08	1.36742e-08	1.18311e-08	1.12873e-08	1.30624e-08	1.08717e-08	1.06054e-08	9.79215e-09	1.60949e-08	1.0818e-08	8.69854e-09	8.4722e-09	8.72151e-09	8.664e-09	8.96367e-09	8.27421e-09	9.38304e-09	7.28232e-09	7.97675e-09	6.54102e-09	6.64159e-09
Water	CZE	4.24063e-09	4.70986e-09	5.26662e-09	4.40515e-09	5.60031e-09	5.09903e-09	3.80944e-09	4.24769e-09	4.01153e-09	3.33405e-09	2.52815e-09	2.68516e-09	2.72155e-09	2.16799e-09	2.11738e-09	1.87298e-09	1.79003e-09	1.91866e-09	1.58278e-09	1.68353e-09	1.63511e-09
Water	DEU	4.68973e-09	4.88552e-09	4.11517e-09	5.0016e-09	4.9395e-09	5.02447e-09	5.49717e-09	5.30732e-09	5.18236e-09	5.10642e-09	4.05883e-09	4.08926e-09	4.39299e-09	3.47002e-09	3.3842e-09	3.22261e-09	2.80614e-09	3.01749e-09	2.74858e-09	3.07216e-09	3.24656e-09
Water	DNK	3.86704e-09	4.02561e-09	3.46865e-09	3.64897e-09	3.61805e-09	3.85335e-09	4.15235e-09	3.96153e-09	4.60766e-09	4.59792e-09	2.86578e-09	3.79958e-09	3.85273e-09	3.04185e-09	3.22626e-09	2.79085e-09	2.69979e-09	2.47261e-09	2.43975e-09	2.96515e-09	2.74743e-09
Water	EST	9.9344e-10	2.43831e-09	3.17202e-09	3.56541e-09	4.56949e-09	4.19587e-09	5.43063e-09	4.51745e-09	5.02515e-09	4.31953e-09	2.14294e-09	2.67621e-09	2.87241e-09	2.82793e-09	2.70239e-09	2.45993e-09	2.23493e-09	2.18271e-09	2.36423e-09	2.37405e-09	2.23572e-09
Water	ESP	1.61732e-08	1.60601e-08	1.50553e-08	1.68755e-08	1.55658e-08	1.71182e-08	1.38896e-08	1.23112e-08	1.24233e-08	1.39661e-08	1.08766e-08	1.11228e-08	1.21118e-08	9.59354e-09	9.69366e-09	9.26159e-09	8.09453e-09	8.30286e-09	7.593e-09	7.15206e-09	1.07373e-08
Water	FIN	5.22847e-09	5.32567e-09	4.45364e-09	5.3977e-09	5.74727e-09	5.394e-09	5.68903e-09	4.99078e-09	4.95045e-09	5.70543e-09	4.1084e-09	3.57232e-09	4.5604e-09	4.0103e-09	3.82432e-09	3.43348e-09	3.29614e-09	3.40069e-09	3.13627e-09	3.13675e-09	3.07262e-09
Water	FRA	6.60712e-09	6.50248e-09	5.56522e-09	6.52136e-09	6.64322e-09	6.32316e-09	5.9221e-09	5.67794e-09	5.33583e-09	4.4589e-09	3.57032e-09	3.73054e-09	4.4412e-09	3.89974e-09	3.89458e-09	3.66355e-09	3.49593e-09	3.62468e-09	3.23704e-09	3.48084e-09	3.61102e-09
Water	GRC	2.56925e-08	2.22157e-08	1.67334e-08	1.86115e-08	2.06698e-08	1.73952e-08	1.67483e-08	1.75288e-08	2.03657e-08	1.68758e-08	1.31266e-08	1.54722e-08	1.70247e-08	1.43759e-08	1.0776e-08	1.03537e-08	1.09038e-08	1.09108e-08	9.24705e-09	1.00759e-08	1.15177e-08
Water	HRV	2.77071e-09	2.96459e-09	2.77183e-09	3.00908e-09	3.24558e-09	3.00864e-09	3.04621e-09	2.72845e-09	3.9787e-09	3.20761e-09	2.13442e-09	1.75777e-09	1.77502e-09	1.5806e-09	1.6304e-09	1.43329e-09	1.30208e-09	1.2697e-09	1.37332e-09	1.81089e-09	1.39899e-09
Water	HUN	3.25586e-09	3.14454e-09	3.26551e-09	3.46732e-09	3.14578e-09	2.67833e-09	2.6768e-09	2.66321e-09	3.00179e-09	2.66533e-09	1.65675e-09	1.69068e-09	1.64923e-09	1.51234e-09	1.49324e-09	1.26094e-09	1.36135e-09	1.51219e-09	1.16142e-09	1.11844e-09	1.16369e-09
Water	IRL	5.47647e-09	5.54413e-09	4.19089e-09	4.73339e-09	4.57902e-09	4.90997e-09	5.58146e-09	5.02033e-09	5.34203e-09	5.37126e-09	2.39213e-09	2.3258e-09	2.36185e-09	2.33936e-09	2.46731e-09	2.53288e-09	2.77844e-09	2.98708e-09	2.30615e-09	3.25434e-09	2.09232e-09
Water	ITA	7.3506e-09	7.07065e-09	6.53948e-09	7.41746e-09	6.63778e-09	6.70812e-09	7.33433e-09	6.6695e-09	6.1825e-09	6.96259e-09	5.61714e-09	5.45058e-09	5.28928e-09	4.74111e-09	4.1605e-09	4.53884e-09	4.19554e-09	5.46216e-09	4.27495e-09	4.02764e-09	4.32355e-09
Water	LTU	4.07854e-10	8.74818e-10	2.50294e-09	2.59556e-09	3.77821e-09	4.77892e-09	5.53247e-09	5.07927e-09	5.86678e-09	4.71785e-09	2.13307e-09	2.2442e-09	5.67448e-09	2.85877e-09	5.63686e-09	2.35129e-09	2.08879e-09	1.69767e-09	1.93794e-09	2.26124e-09	2.0739e-09
Water	LUX	1.33994e-08	1.15556e-08	9.6557e-09	1.08349e-08	1.21675e-08	1.10452e-08	1.08076e-08	9.69476e-09	1.11935e-08	1.25606e-08	6.11901e-09	5.65965e-09	6.32242e-09	6.11441e-09	6.95571e-09	4.99958e-09	5.71193e-09	4.34814e-09	2.68966e-09	5.21034e-09	4.96583e-09
Water	LVA	2.54184e-10	1.00769e-09	6.57713e-10	1.41049e-09	2.33528e-09	4.03362e-09	9.91351e-09	1.97265e-08	1.48056e-08	4.88306e-09	2.47406e-09	3.27639e-09	8.97176e-09	3.42762e-09	8.24188e-09	8.14632e-09	1.74546e-08	2.47903e-08	1.54721e-08	1.78597e-08	2.87137e-08
Water	MLT	4.92271e-10	3.76986e-10	3.35781e-10	4.21832e-10	5.06008e-10	5.37073e-10	5.07873e-10	5.25887e-10	3.99501e-10	3.58787e-10	3.25169e-10	2.7172e-10	2.66752e-10	3.9055e-10	3.38963e-10	6.70952e-10	1.3915e-09	1.39633e-09	2.25527e-09	2.49243e-09	2.14364e-09
Water	NLD	8.90562e-09	9.09388e-09	8.27602e-09	1.06428e-08	8.62561e-09	8.74264e-09	8.99529e-09	9.32862e-09	7.9038e-09	9.36475e-09	3.86181e-09	3.84025e-09	5.0437e-09	3.93603e-09	4.47064e-09	4.93465e-09	3.61338e-09	4.57183e-09	3.93855e-09	3.85513e-09	4.43252e-09
Water	POL	3.7409e-09	4.04374e-09	3.77547e-09	3.53108e-09	3.78569e-09	3.17457e-09	2.56378e-09	2.79566e-09	2.96543e-09	2.34877e-09	2.28109e-09	2.01603e-09	2.27418e-09	1.91791e-09	2.22871e-09	2.70855e-09	1.7799e-09	1.94291e-09	1.68607e-09	1.78317e-09	1.70954e-09
Water	PRT	1.1459e-08	1.07427e-08	1.0233e-08	1.04682e-08	8.81207e-09	9.04271e-09	8.16986e-09	8.25635e-09	8.55793e-09	7.90594e-09	7.37607e-09	6.7884e-09	7.4132e-09	7.11817e-09	6.36305e-09	6.97341e-09	6.29329e-09	6.39217e-09	5.16729e-09	5.81794e-09	5.88016e-09
Water	ROM	4.73428e-09	4.66453e-09	3.74669e-09	4.40286e-09	4.33553e-09	2.93082e-09	3.2111e-09	3.4335e-09	3.561e-09	2.97644e-09	2.71451e-09	2.34286e-09	2.09478e-09	1.80982e-09	2.44968e-09	1.86232e-09	1.57465e-09	1.87849e-09	1.75303e-09	1.95681e-09	1.90658e-09
Water	SWE	4.51587e-09	4.54771e-09	4.02622e-09	4.19604e-09	3.85381e-09	3.83096e-09	4.20339e-09	3.93725e-09	3.97636e-09	4.35764e-09	4.05568e-09	3.74358e-09	4.34254e-09	4.28166e-09	4.18076e-09	2.96404e-09	2.87527e-09	3.46732e-09	2.78044e-09	2.78636e-09	2.71514e-09
Water	SVN	7.08456e-09	7.66682e-09	6.73997e-09	6.81645e-09	8.5296e-09	7.31465e-09	6.70172e-09	5.84728e-09	6.68373e-09	8.23991e-09	7.80573e-09	7.3006e-09	9.2465e-09	7.70759e-09	5.84579e-09	6.00405e-09	5.8829e-09	5.42006e-09	4.75744e-09	5.05415e-09	8.20825e-09
Water	SVK	3.36217e-09	4.63175e-09	4.73881e-09	5.5513e-09	6.55795e-09	5.09199e-09	4.03862e-09	3.47411e-09	3.31114e-09	3.31751e-09	2.68465e-09	2.40766e-09	2.5065e-09	2.27902e-09	2.52844e-09	2.63861e-09	2.18717e-09	2.0791e-09	1.98018e-09	2.03956e-09	1.88631e-09
Water	GBR	7.67793e-09	7.82223e-09	7.14854e-09	7.33935e-09	8.13454e-09	8.16153e-09	8.62222e-09	7.49317e-09	7.37684e-09	7.09905e-09	5.81136e-09	5.63376e-09	6.19478e-09	5.33288e-09	5.3483e-09	5.12314e-09	4.28287e-09	4.17017e-09	3.95312e-09	4.43881e-09	4.31306e-09
Water	USA	6.14451e-09	5.58774e-09	6.11569e-09	6.29999e-09	5.57214e-09	5.5466e-09	5.76017e-09	4.93558e-09	5.08819e-09	4.10041e-09	4.55764e-09	4.53125e-09	5.14763e-09	4.83215e-09	4.48764e-09	3.75761e-09	3.84961e-09	3.83249e-09	3.55947e-09	3.38437e-09	3.47e-09
Water	JPN	5.72237e-09	5.36685e-09	5.0088e-09	4.71153e-09	5.23323e-09	5.42205e-09	5.79822e-09	5.26908e-09	5.18393e-09	4.5666e-09	3.78436e-09	4.58957e-09	4.47586e-09	3.68136e-09	3.6254e-09	2.78205e-09	2.15316e-09	2.54919e-09	2.27809e-09	2.55031e-09	2.27667e-09
Water	CHN	2.06192e-08	1.79256e-08	1.55625e-08	1.36924e-08	1.24413e-08	1.28199e-08	1.22866e-08	1.08042e-08	1.0257e-08	1.11235e-08	1.07957e-08	1.10855e-08	9.92945e-09	9.51773e-09	9.31493e-09	8.89954e-09	7.6284e-09	7.68649e-09	7.21451e-09	7.53518e-09	7.07744e-09
Water	CAN	3.23802e-09	3.47613e-09	3.31977e-09	3.53998e-09	3.58418e-09	3.85511e-09	4.28312e-09	4.43394e-09	3.8724e-09	4.12937e-09	3.76017e-09	4.01848e-09	4.1782e-09	3.52146e-09	3.13966e-09	3.04351e-09	2.70521e-09	2.91603e-09	2.61695e-09	2.6554e-09	2.94343e-09
Water	KOR	6.97092e-09	7.67887e-09	1.20661e-08	7.10397e-09	8.08195e-09	7.67644e-09	8.39707e-09	8.88081e-09	6.94753e-09	5.12534e-09	5.00699e-09	6.26598e-09	6.44376e-09	5.92331e-09	4.81509e-09	4.09095e-09	3.70166e-09	4.29811e-09	4.10098e-09	3.69063e-09	3.53096e-09
Water	BRA	2.38202e-09	1.91945e-09	1.92445e-09	1.94709e-09	1.77488e-09	1.71518e-09	1.8147e-09	1.88144e-09	2.05827e-09	1.91613e-09	1.86652e-09	2.15776e-09	2.10488e-09	1.98537e-09	1.85546e-09	1.67051e-09	1.64829e-09	1.73043e-09	1.59567e-09	1.67439e-09	1.66821e-09
Water	IND	8.06722e-08	7.88374e-08	6.89512e-08	6.69443e-08	5.98553e-08	5.73199e-08	5.67681e-08	5.4048e-08	5.39685e-08	4.84983e-08	4.59224e-08	4.08922e-08	4.14133e-08	3.76331e-08	3.40694e-08	3.32861e-08	3.45919e-08	3.26853e-08	3.1309e-08	3.01032e-08	3.19186e-08
Water	MEX	1.32386e-08	1.40126e-08	1.36976e-08	1.25998e-08	1.15419e-08	1.21853e-08	1.21485e-08	1.09986e-08	1.09037e-08	1.26889e-08	1.10325e-08	1.11547e-08	1.13744e-08	1.01102e-08	9.00305e-09	8.21615e-09	7.65491e-09	8.2206e-09	8.28474e-09	8.15688e-09	7.71399e-09
Water	RUS	6.05486e-09	5.79818e-09	3.73281e-09	3.92613e-09	5.16794e-09	4.16783e-09	4.98692e-09	4.78803e-09	5.01518e-09	4.67225e-09	5.16466e-09	5.07975e-09	5.66554e-09	5.80579e-09	4.97442e-09	4.17714e-09	3.57694e-09	3.60322e-09	3.72722e-09	3.78237e-09	3.26325e-09
Water	AUS	1.27989e-08	1.64911e-08	1.62945e-08	1.29987e-08	1.11654e-08	1.15347e-08	1.49374e-08	1.05103e-08	7.19731e-09	7.91265e-09	6.33388e-09	6.84968e-09	7.19807e-09	7.80387e-09	7.27535e-09	7.09283e-09	5.30105e-09	6.98273e-09	5.31453e-09	4.47746e-09	4.44273e-09
Water	CHE	5.55414e-09	5.12247e-09	4.7186e-09	5.35973e-09	4.98198e-09	4.84729e-09	4.4838e-09	4.22605e-09	4.67831e-09	5.04702e-09	3.52695e-09	4.06352e-09	4.38421e-09	3.95801e-09	3.68918e-09	3.62544e-09	2.94477e-09	3.47562e-09	2.68969e-09	3.20509e-09	3.50874e-09
Water	TUR	1.49262e-08	1.21919e-08	1.12276e-08	1.24619e-08	1.03316e-08	1.14544e-08	1.10631e-08	1.06558e-08	1.13497e-08	8.14351e-09	1.09189e-08	7.13277e-09	9.15796e-09	8.19815e-09	9.97378e-09	7.73492e-09	7.70255e-09	7.61652e-09	6.5328e-09	6.4914e-09	9.38279e-09
Water	TWN	9.09727e-07	6.80947e-07	7.43154e-07	6.03073e-07	5.94818e-07	5.77481e-07	5.51588e-07	4.30276e-07	4.11105e-07	3.66817e-07	3.32004e-07	2.73324e-07	2.3134e-07	2.70996e-07	2.56352e-07	2.09118e-07	1.7594e-07	1.70324e-07	1.51482e-07	1.38036e-07	1.13329e-07
Water	NOR	3.25233e-09	4.12546e-09	3.42192e-09	3.44813e-09	3.6747e-09	3.57224e-09	3.70985e-09	3.72845e-09	4.60438e-09	3.66964e-09	3.51916e-09	3.914e-09	3.75593e-09	3.5572e-09	2.65809e-09	2.37878e-09	2.3535e-09	2.57545e-09	2.50893e-09	2.74031e-09	2.35223e-09
Water	IDN	1.53937e-08	1.45444e-08	1.49033e-08	1.39548e-08	1.43187e-08	1.37214e-08	1.35172e-08	1.41759e-08	1.34821e-08	1.21544e-08	1.21279e-08	1.23002e-08	1.15449e-08	1.08102e-08	1.06543e-08	9.18409e-09	8.47052e-09	8.38643e-09	9.36997e-09	7.5442e-09	7.35341e-09
Water	ZAF	1.46238e-08	1.23672e-08	1.16079e-08	1.50661e-08	1.48664e-08	1.33652e-08	1.09601e-08	1.23851e-08	1.02225e-08	8.98428e-09	7.9411e-09	7.14029e-09	8.38271e-09	7.04331e-09	6.94811e-09	7.67112e-09	6.9046e-09	6.91351e-09	6.36114e-09	7.03964e-09	6.79483e-09
Water	WWA	2.6196e-08	2.41055e-08	2.63905e-08	2.37017e-08	2.37636e-08	2.18093e-08	1.85733e-08	1.57339e-08	1.63204e-08	2.04475e-08	1.82799e-08	1.61223e-08	1.68938e-08	1.66002e-08	1.58228e-08	1.42336e-08	1.48002e-08	1.41853e-08	1.4297e-08	1.14997e-08	1.34384e-08
Water	WWL	4.99314e-09	5.05569e-09	5.02279e-09	4.2263e-09	3.96742e-09	4.11319e-09	4.78974e-09	4.41744e-09	4.72148e-09	5.14762e-09	4.14523e-09	4.11454e-09	4.15151e-09	4.20086e-09	4.15605e-09	4.1925e-09	3.24312e-09	3.23299e-09	3.0403e-09	2.83814e-09	3.15535e-09
Water	WWE	5.63475e-09	5.19252e-09	4.47089e-09	8.33888e-09	5.02354e-09	3.66179e-09	4.90662e-09	4.46619e-09	5.06643e-09	4.64528e-09	4.01158e-09	3.64825e-09	4.46058e-09	4.37454e-09	3.38008e-09	4.26399e-09	3.35516e-09	4.27698e-09	3.84109e-09	3.57467e-09	3.81812e-09
Water	WWF	2.15597e-08	2.15185e-08	2.46884e-08	2.30965e-08	1.9834e-08	2.2061e-08	1.84203e-08	1.9932e-08	2.01248e-08	1.85757e-08	1.7941e-08	1.9995e-08	1.93273e-08	1.86207e-08	1.86433e-08	1.75448e-08	1.80781e-08	1.69046e-08	1.45069e-08	1.53073e-08	1.55666e-08
Water	WWM	4.24236e-08	3.83826e-08	3.97638e-08	2.86982e-08	2.96739e-08	3.12018e-08	2.75695e-08	2.82549e-08	2.95244e-08	2.75791e-08	2.618e-08	2.87106e-08	2.60478e-08	2.9084e-08	2.78212e-08	2.46773e-08	2.36606e-08	2.27738e-08	2.15652e-08	2.13678e-08	2.15867e-08
Water	Advanced	7.00869e-09	6.84176e-09	6.75942e-09	6.97549e-09	6.70385e-09	6.70935e-09	6.88841e-09	6.26118e-09	6.14863e-09	5.68963e-09	4.9267e-09	5.05687e-09	5.48706e-09	4.86421e-09	4.62539e-09	4.1605e-09	3.85573e-09	4.10212e-09	3.67717e-09	3.69061e-09	3.85073e-09
Water	EmergingDeveloping	2.35395e-08	2.22536e-08	2.13115e-08	1.93039e-08	1.82097e-08	1.80702e-08	1.70064e-08	1.61158e-08	1.61448e-08	1.62398e-08	1.54432e-08	1.49658e-08	1.46868e-08	1.43149e-08	1.3681e-08	1.29001e-08	1.27202e-08	1.23559e-08	1.18355e-08	1.13723e-08	1.16892e-08
Water	Global	1.42836e-08	1.36676e-08	1.3307e-08	1.26558e-08	1.21252e-08	1.21556e-08	1.18535e-08	1.12333e-08	1.12932e-08	1.13003e-08	1.06513e-08	1.04892e-08	1.06593e-08	1.0234e-08	9.83804e-09	9.23426e-09	8.99753e-09	8.93867e-09	8.51038e-09	8.28925e-09	8.57024e-09

## Sheet: ImportShare
indicator	region	2000	2001	2002	2003	2004	2005	2006	2007	2008	2009	2010	2011	2012	2013	2014	2015	2016	2017	2018	2019	2020
Climate	AUT	0.553053	0.597892	0.606638	0.608627	0.609958	0.63685	0.655706	0.652296	0.651814	0.606543	0.550515	0.572242	0.570528	0.592332	0.598947	0.573742	0.574529	0.580429	0.607789	0.624424	0.587027
Climate	BEL	0.650945	0.64505	0.641496	0.659227	0.663957	0.730248	0.720397	0.737604	0.76368	0.728769	0.667914	0.715166	0.7059	0.694408	0.703832	0.729101	0.724459	0.745513	0.756854	0.755626	0.753335
Climate	BGR	0.063965	0.0734581	0.114702	0.129958	0.158746	0.170871	0.19623	0.258144	0.350935	0.265316	0.290669	0.28402	0.295103	0.311601	0.351335	0.319291	0.317814	0.324278	0.379222	0.412936	0.378325
Climate	CYP	0.0405311	0.0274649	0.0305056	0.0311394	0.0310258	0.0336519	0.0530201	0.0632078	0.120018	0.071784	0.0771603	0.0784748	0.0745985	0.0735513	0.107099	0.152542	0.222882	0.303765	0.322304	0.430591	0.461316
Climate	CZE	0.207966	0.213858	0.267951	0.263217	0.311998	0.343395	0.414066	0.416107	0.430841	0.413018	0.401554	0.449534	0.439876	0.45329	0.415623	0.424328	0.402294	0.473613	0.46748	0.46055	0.415522
Climate	DEU	0.466076	0.440357	0.43946	0.450845	0.46719	0.486468	0.505333	0.500019	0.499253	0.487837	0.463761	0.499982	0.47199	0.471021	0.475447	0.481259	0.466266	0.503804	0.516244	0.5387	0.528494
Climate	DNK	0.43406	0.426183	0.474288	0.481418	0.510721	0.570254	0.596534	0.589147	0.634601	0.610688	0.659727	0.679964	0.676046	0.67253	0.710358	0.727627	0.729337	0.72642	0.661444	0.744878	0.619073
Climate	EST	0.0566186	0.0759124	0.117787	0.127837	0.15688	0.182208	0.268161	0.255776	0.272383	0.192213	0.178995	0.350658	0.415538	0.360737	0.383675	0.363811	0.355048	0.366998	0.414165	0.535345	0.575048
Climate	ESP	0.414984	0.42423	0.424644	0.438484	0.446737	0.437372	0.462572	0.471447	0.492255	0.431095	0.460897	0.458191	0.44148	0.44939	0.467416	0.456055	0.457514	0.471413	0.441261	0.521725	0.474641
Climate	FIN	0.422401	0.390677	0.428067	0.442439	0.456057	0.513317	0.490614	0.497704	0.562247	0.487568	0.461262	0.522202	0.471674	0.46546	0.4761	0.443435	0.441498	0.471164	0.482435	0.496067	0.458593
Climate	FRA	0.537578	0.527608	0.531232	0.551688	0.562478	0.565788	0.578639	0.578709	0.593156	0.556631	0.52919	0.534298	0.56492	0.544692	0.555338	0.553905	0.548127	0.592289	0.586577	0.588244	0.570504
Climate	GRC	0.308485	0.306831	0.311422	0.341287	0.348082	0.321715	0.34201	0.32166	0.401218	0.308714	0.288721	0.320003	0.314404	0.292942	0.299771	0.328469	0.319227	0.305374	0.333132	0.450688	0.327884
Climate	HRV	0.245709	0.284285	0.327205	0.369688	0.377372	0.397575	0.375944	0.362596	0.419602	0.389086	0.363217	0.382094	0.366452	0.433483	0.422004	0.453652	0.462121	0.494666	0.503639	0.528231	0.495547
Climate	HUN	0.409661	0.42304	0.457353	0.490342	0.510165	0.542379	0.592051	0.621485	0.638196	0.624503	0.548122	0.554597	0.543576	0.544596	0.570941	0.541543	0.539319	0.599498	0.595485	0.583161	0.517154
Climate	IRL	0.576649	0.540939	0.538455	0.560167	0.608437	0.639457	0.669223	0.717759	0.722987	0.685417	0.575981	0.621556	0.618553	0.582804	0.630706	0.772277	0.793353	0.848088	0.837842	0.899205	0.883194
Climate	ITA	0.47858	0.486228	0.490136	0.482638	0.491404	0.491056	0.517742	0.505974	0.509098	0.502858	0.513615	0.517965	0.492268	0.496698	0.509657	0.509336	0.499933	0.508327	0.527666	0.524079	0.499624
Climate	LTU	0.0487785	0.0388271	0.109393	0.120067	0.182823	0.334333	0.370538	0.410234	0.486922	0.346602	0.445609	0.534546	0.584075	0.576523	0.561592	0.508562	0.477297	0.531933	0.57821	0.632126	0.536367
Climate	LUX	0.683031	0.637776	0.578079	0.609763	0.665778	0.748101	0.815794	0.829378	0.811481	0.801943	0.735034	0.745373	0.777536	0.787868	0.783363	0.844685	0.791796	0.766309	0.883928	0.887436	0.816722
Climate	LVA	0.0620345	0.0622975	0.0781478	0.102338	0.162647	0.263105	0.382806	0.441787	0.457782	0.29259	0.269606	0.37796	0.396249	0.414553	0.497652	0.458998	0.446375	0.540369	0.468108	0.539973	0.489461
Climate	MLT	0.152286	0.0623652	0.0469546	0.0854176	0.0960455	0.12419	0.085262	0.0751165	0.0777393	0.073069	0.05819	0.0594112	0.0561054	0.0750079	0.0531608	0.342904	0.585286	0.633811	0.705211	0.810884	0.769984
Climate	NLD	0.652818	0.627012	0.643999	0.667581	0.663143	0.67666	0.685073	0.678817	0.685245	0.675571	0.643137	0.666817	0.68509	0.694936	0.693287	0.7458	0.677759	0.733678	0.76426	0.777485	0.765645
Climate	POL	0.155628	0.160946	0.170133	0.183704	0.187623	0.206225	0.212109	0.237971	0.281697	0.230114	0.247153	0.268189	0.25334	0.246793	0.27983	0.271408	0.272285	0.289747	0.311433	0.335464	0.327703
Climate	PRT	0.399354	0.39327	0.390017	0.42646	0.442564	0.418616	0.438541	0.462605	0.47268	0.412686	0.452235	0.442164	0.404929	0.418207	0.43878	0.439683	0.432102	0.425688	0.453328	0.486501	0.458207
Climate	ROM	0.096565	0.104982	0.137853	0.191779	0.202772	0.264708	0.257624	0.300934	0.310499	0.253323	0.283411	0.31022	0.291972	0.303578	0.332038	0.339777	0.348882	0.36911	0.398815	0.418684	0.395991
Climate	SWE	0.62115	0.595783	0.597996	0.628737	0.644863	0.656035	0.685478	0.701475	0.694397	0.664044	0.659659	0.689038	0.6708	0.675568	0.698022	0.66549	0.669407	0.663823	0.681523	0.70251	0.681617
Climate	SVN	0.470871	0.505244	0.522041	0.562645	0.626099	0.626965	0.643379	0.62115	0.6083	0.568457	0.459875	0.55246	0.564377	0.528239	0.530758	0.546035	0.550862	0.602759	0.632674	0.65756	0.565265
Climate	SVK	0.289443	0.313707	0.328514	0.373276	0.448501	0.504825	0.559015	0.616569	0.629532	0.585061	0.569832	0.58827	0.617997	0.625091	0.589696	0.613072	0.517134	0.587176	0.585737	0.633717	0.574125
Climate	GBR	0.442148	0.440888	0.457126	0.46119	0.48719	0.503123	0.53571	0.518955	0.532723	0.504677	0.51627	0.541325	0.51272	0.520164	0.551812	0.560432	0.573588	0.593661	0.606538	0.649038	0.610934
Climate	USA	0.232465	0.249543	0.259296	0.265061	0.275678	0.280575	0.293952	0.283947	0.258833	0.253592	0.251167	0.261114	0.259411	0.249312	0.265008	0.281466	0.262338	0.283473	0.282767	0.373981	0.274966
Climate	JPN	0.395317	0.382166	0.361699	0.390874	0.407878	0.406382	0.440519	0.429669	0.453074	0.393684	0.420226	0.454254	0.426782	0.397258	0.410948	0.384272	0.34839	0.394998	0.408654	0.433517	0.391475
Climate	CAN	0.465008	0.444077	0.412378	0.427421	0.431308	0.468085	0.471712	0.46238	0.476338	0.441472	0.40545	0.391399	0.426857	0.39937	0.451254	0.483463	0.374974	0.390856	0.692463	-0.215931	0.351756
Climate	KOR	0.441456	0.403744	0.417696	0.445587	0.459845	0.494777	0.522056	0.531687	0.54518	0.459724	0.454595	0.506626	0.498183	0.467904	0.466399	0.42736	0.412042	0.457373	0.441168	0.452436	0.425718
Climate	AUS	0.166854	0.133719	0.1608	0.198424	0.217558	0.245325	0.246115	0.274213	0.301346	0.246112	0.298185	0.33602	0.294982	0.304605	0.306388	0.299715	0.26512	0.329948	0.269853	0.292099	0.288172
Climate	CHE	0.673331	0.654316	0.677368	0.68073	0.690635	0.72188	0.735784	0.759713	0.783246	0.783913	0.81843	0.866061	0.826457	0.822763	0.764636	0.78501	0.765148	0.749469	0.699101	0.719447	0.761206
Climate	TWN	0.594571	0.473147	0.350258	0.29801	0.321985	0.358279	0.364053	0.345133	0.339814	0.273349	0.397832	0.379486	0.35574	0.372564	0.369429	0.335381	0.326499	0.324204	0.326123	0.354933	0.299587
Climate	NOR	0.436223	0.43663	0.453171	0.462881	0.458947	0.503917	0.493163	0.504305	0.547408	0.497538	0.558469	0.593829	0.590193	0.573571	0.624028	0.522974	0.589722	0.579271	0.556707	0.590873	0.572788
Climate	CHN	0.0797073	0.0807442	0.0901116	0.0947959	0.0919933	0.0888092	0.0888856	0.0894588	0.104273	0.0955822	0.0998286	0.109457	0.104094	0.107694	0.112074	0.116879	0.107526	0.121417	0.131134	0.134264	0.130817
Climate	BRA	0.144302	0.149517	0.165843	0.153553	0.139174	0.132383	0.141902	0.145504	0.191811	0.174859	0.192655	0.224001	0.22132	0.225261	0.218245	0.177595	0.154817	0.17205	0.195392	0.211604	0.185743
Climate	IND	0.0473147	0.0495385	0.0626871	0.0631521	0.0806965	0.109591	0.123473	0.131035	0.133624	0.137394	0.148935	0.174126	0.150886	0.126711	0.125125	0.124932	0.119502	0.146564	0.137112	0.131387	0.119997
Climate	MEX	0.32487	0.311776	0.315004	0.282662	0.293707	0.30189	0.314181	0.31116	0.322211	0.253776	0.262777	0.285734	0.275126	0.272004	0.283446	0.292399	0.291201	0.306234	0.320673	0.341751	0.352237
Climate	RUS	0.0820029	0.0902149	0.0993978	0.113694	0.12931	0.128342	0.135185	0.14821	0.176519	0.139887	0.179367	0.194226	0.194451	0.205836	0.20412	0.151837	0.130959	0.156045	0.160078	0.152074	0.132171
Climate	TUR	0.308267	0.256503	0.273927	0.289939	0.338753	0.353817	0.347528	0.346291	0.358327	0.299356	0.329386	0.353	0.374304	0.392231	0.408478	0.384913	0.287815	0.310382	0.290608	0.266509	0.267664
Climate	IDN	0.143513	0.154337	0.166011	0.124112	0.146028	0.15014	0.147826	0.185285	0.213915	0.160637	0.206289	0.248822	0.186176	0.186445	0.206364	0.186145	0.126278	0.189923	0.1693	0.164175	0.138015
Climate	ZAF	0.0835968	0.0752391	0.082435	0.0935878	0.107169	0.124023	0.173497	0.15212	0.142802	0.124992	0.134893	0.157162	0.122774	0.124304	0.121253	0.120841	0.102594	0.117942	0.138928	0.12054	0.077228
Climate	WWA	0.384631	0.372622	0.396735	0.393975	0.422904	0.464655	0.509179	0.439781	0.481057	0.430297	0.464218	0.532074	0.4948	0.515305	0.528842	0.524385	0.476869	0.522315	0.503467	0.500592	0.474741
Climate	WWL	0.265678	0.255451	0.273034	0.246252	0.251875	0.250418	0.268703	0.291469	0.323554	0.271181	0.326683	0.339659	0.353368	0.352528	0.342579	0.384314	0.328308	0.34976	0.363079	0.371065	0.324906
Climate	WWE	0.180697	0.18748	0.213068	0.228611	0.253208	0.265024	0.276334	0.312849	0.340056	0.296486	0.378276	0.395491	0.380201	0.361104	0.340283	0.320409	0.324579	0.367338	0.356327	0.380058	0.341889
Climate	WWF	0.113369	0.126233	0.144698	0.146586	0.149252	0.152621	0.166065	0.219718	0.232821	0.224605	0.232461	0.238382	0.227574	0.237357	0.231776	0.228654	0.222947	0.253486	0.222704	0.216505	0.200426
Climate	WWM	0.219379	0.224796	0.23827	0.228556	0.240425	0.25857	0.286819	0.323022	0.31542	0.31159	0.31546	0.328426	0.326781	0.332846	0.331717	0.321291	0.293861	0.320457	0.31088	0.325781	0.2935
Climate	Advanced	0.197719	0.20044	0.208055	0.223629	0.232401	0.242892	0.261632	0.255284	0.251906	0.231879	0.236834	0.256865	0.245964	0.23983	0.247954	0.246485	0.227748	0.258017	0.248554	0.267883	0.260851
Climate	EmergingDeveloping	0.0616438	0.0548682	0.0562846	0.0519054	0.0548397	0.0557422	0.0576883	0.0587016	0.0671009	0.0580025	0.0622413	0.0634907	0.0625817	0.0621167	0.0595248	0.059239	0.0566616	0.0584041	0.0604792	0.0647597	0.0493858
Climate	Global	0	0	0	0	0	0	0	0	0	0	0	0	0	0	0	0	0	0	0	0	0
Land	AUT	0.448222	0.427604	0.466348	0.490607	0.511854	0.540603	0.548433	0.559649	0.574641	0.570456	0.608377	0.616769	0.638825	0.611358	0.642165	0.632135	0.62267	0.658768	0.688569	0.734928	0.64907
Land	BEL	0.878316	0.858433	0.86269	0.875554	0.879461	0.898797	0.886191	0.923888	0.923427	0.902017	0.892338	0.906416	0.915342	0.922369	0.890992	0.921797	0.922103	0.927744	0.945944	0.937304	0.935666
Land	BGR	0.0247443	0.0370464	0.111756	0.120672	0.127552	0.103145	0.110586	0.162562	0.222262	0.159664	0.191635	0.240335	0.176302	0.227362	0.236631	0.242737	0.290846	0.313639	0.325811	0.368252	0.406661
Land	CYP	0.0687442	0.0513589	0.0526488	0.0628709	0.0873854	0.0814646	0.143144	0.183269	0.637866	0.347055	0.346	0.390168	0.452868	0.38954	0.514781	0.689839	0.654687	0.740231	0.783686	0.774864	0.789626
Land	CZE	0.175691	0.182224	0.21049	0.250568	0.274157	0.318193	0.296642	0.302475	0.323896	0.324555	0.318021	0.355335	0.340128	0.338822	0.340103	0.361505	0.350695	0.392506	0.369237	0.357012	0.349618
Land	DEU	0.664261	0.586527	0.630055	0.641347	0.630272	0.635563	0.63318	0.628037	0.645655	0.650872	0.657509	0.664721	0.660357	0.65204	0.649815	0.684388	0.672565	0.67412	0.703004	0.676878	0.668091
Land	DNK	0.411914	0.408832	0.498432	0.569096	0.494174	0.567472	0.57822	0.625607	0.660848	0.610368	0.644071	0.711593	0.727226	0.697132	0.714763	0.739413	0.663236	0.665189	0.687655	0.69557	0.686947
Land	EST	0.0137385	0.0377192	0.0692869	0.0740124	0.0994907	0.133167	0.193217	0.21886	0.222271	0.144165	0.124787	0.394353	0.38504	0.267958	0.414206	0.284994	0.240145	0.222002	0.248234	0.346933	0.232984
Land	ESP	0.387916	0.378415	0.44032	0.410556	0.420192	0.457609	0.439624	0.444091	0.470432	0.427582	0.435375	0.475019	0.479074	0.431444	0.443965	0.464772	0.462283	0.498155	0.479434	0.511795	0.427027
Land	FIN	0.439508	0.412978	0.489296	0.451986	0.458343	0.456906	0.448055	0.456932	0.488671	0.466037	0.485941	0.558278	0.516987	0.469818	0.533866	0.475545	0.430081	0.461311	0.480324	0.465189	0.443571
Land	FRA	0.416521	0.387249	0.395584	0.434575	0.414728	0.427439	0.416049	0.418759	0.496898	0.472855	0.494013	0.517573	0.525247	0.525249	0.526053	0.547068	0.473973	0.498002	0.524225	0.516126	0.502055
Land	GRC	0.29498	0.308901	0.372768	0.366582	0.335277	0.365733	0.374328	0.39239	0.423355	0.376943	0.403462	0.425322	0.387529	0.334785	0.342414	0.305646	0.273763	0.303056	0.337634	0.332748	0.269583
Land	HRV	0.117543	0.129122	0.171437	0.206686	0.231873	0.220836	0.207131	0.229943	0.250691	0.25177	0.194587	0.212748	0.203386	0.152323	0.161526	0.188676	0.185138	0.208192	0.238005	0.270101	0.238744
Land	HUN	0.148479	0.158399	0.194838	0.270511	0.269262	0.266874	0.305689	0.29341	0.300856	0.307916	0.356816	0.271445	0.269511	0.230557	0.237252	0.283468	0.26464	0.340696	0.289577	0.307607	0.298743
Land	IRL	0.503992	0.512997	0.354977	0.479934	0.568122	0.635651	0.616783	0.73979	0.707245	0.652259	0.554458	0.625519	0.649862	0.56858	0.586325	0.790101	0.802844	0.804768	0.829768	0.8712	0.83149
Land	ITA	0.617346	0.620835	0.648052	0.666276	0.662438	0.663989	0.685257	0.670369	0.657594	0.640891	0.638661	0.670587	0.648614	0.601532	0.608263	0.623413	0.628324	0.653598	0.6535	0.637358	0.61927
Land	LTU	0.00247787	0.00424407	0.0196776	0.0220952	0.0349514	0.0853954	0.107713	0.115361	0.211041	0.123458	0.13656	0.178791	0.297286	0.198579	0.253925	0.248629	0.129484	0.173691	0.235584	0.235662	0.210389
Land	LUX	0.856514	0.807422	0.827859	0.802185	0.857288	0.860776	0.896987	0.933358	0.899361	0.921432	0.927685	0.947369	0.95275	0.955527	0.962738	0.955765	0.949346	0.907243	0.901496	0.954627	0.956772
Land	LVA	0.00372216	0.00787437	0.00742676	0.0158179	0.0282924	0.0583333	0.115934	0.168106	0.183648	0.106348	0.0719739	0.107493	0.499254	0.194312	0.235689	0.232963	0.138818	0.177513	0.2	0.208622	0.199131
Land	MLT	0.589671	0.388863	0.252732	0.467257	0.596547	0.656949	0.582563	0.536876	0.549178	0.476175	0.373352	0.358644	0.367623	0.403828	0.303559	0.901982	0.954479	0.96242	0.98093	0.986758	0.988892
Land	NLD	0.926308	0.922698	0.917464	0.937392	0.945484	0.955055	0.945831	0.945394	0.959199	0.97462	0.923933	0.944653	0.959189	0.970521	0.964408	0.96386	0.935981	0.967765	0.959946	0.942092	0.967045
Land	POL	0.12105	0.103748	0.118187	0.162338	0.141571	0.142522	0.156533	0.174728	0.216136	0.184612	0.208441	0.23267	0.243557	0.2331	0.262282	0.285054	0.258323	0.28828	0.306553	0.304253	0.321705
Land	PRT	0.500639	0.510753	0.504169	0.487729	0.516748	0.500882	0.506422	0.560457	0.581032	0.535005	0.558752	0.577776	0.526486	0.504504	0.525043	0.501165	0.469928	0.539024	0.551837	0.537312	0.496581
Land	ROM	0.0339899	0.0408238	0.04425	0.110224	0.0920267	0.0762639	0.0820932	0.138871	0.164141	0.18393	0.21556	0.216736	0.197752	0.207019	0.247174	0.332883	0.28764	0.292608	0.352589	0.367787	0.387815
Land	SWE	0.544244	0.522215	0.505721	0.582313	0.540774	0.554665	0.577644	0.550033	0.638061	0.595401	0.610612	0.609319	0.627465	0.623877	0.657249	0.635086	0.593643	0.60703	0.616497	0.638604	0.621933
Land	SVN	0.363467	0.328422	0.345763	0.391204	0.411642	0.39281	0.428989	0.426174	0.453277	0.407889	0.381203	0.446645	0.603814	0.53804	0.405056	0.415314	0.408018	0.472187	0.509867	0.519945	0.453428
Land	SVK	0.125792	0.160923	0.160527	0.213129	0.267513	0.318291	0.383294	0.395718	0.397994	0.421826	0.42905	0.476705	0.521603	0.441844	0.440591	0.500196	0.434175	0.493628	0.439336	0.399517	0.395633
Land	GBR	0.62872	0.597231	0.612236	0.639864	0.643874	0.689221	0.653196	0.625952	0.635468	0.598952	0.620633	0.638181	0.638462	0.636321	0.622972	0.676649	0.658109	0.655351	0.663822	0.658011	0.610836
Land	USA	0.352764	0.361508	0.341631	0.36696	0.382882	0.384967	0.36931	0.349451	0.34933	0.329831	0.354361	0.352845	0.363218	0.345396	0.358968	0.387187	0.38175	0.397979	0.377199	0.371486	0.382136
Land	JPN	0.916007	0.913861	0.896561	0.909168	0.910841	0.917421	0.91744	0.916342	0.922311	0.897228	0.907667	0.913925	0.906925	0.895799	0.8905	0.881019	0.876889	0.889979	0.884509	0.889659	0.873279
Land	CAN	0.360302	0.404526	0.315898	0.359245	0.371913	0.344228	0.398065	0.421203	0.44531	0.41032	0.442552	0.446057	0.484056	0.465197	0.441497	0.464396	0.422551	0.438979	0.453201	0.41631	0.476921
Land	KOR	0.899049	0.899181	0.91131	0.90954	0.922488	0.925718	0.928579	0.930081	0.936006	0.919559	0.934044	0.941963	0.939316	0.94134	0.937757	0.93647	0.94138	0.944048	0.942468	0.9394	0.930736
Land	AUS	0.117603	0.111388	0.0924785	0.124091	0.135946	0.161012	0.14979	0.166385	0.186751	0.147949	0.227163	0.251697	0.200238	0.177782	0.175553	0.259847	0.21367	0.267575	0.181541	0.299954	0.20228
Land	CHE	0.651212	0.620228	0.652318	0.727349	0.714613	0.706747	0.724023	0.688026	0.735734	0.768937	0.781973	0.809895	0.783563	0.814475	0.767325	0.791899	0.775832	0.80935	0.766347	0.753708	0.802988
Land	TWN	1	1	1	1	1	1	1	1	1	1	1	1	1	1	1	1	1	1	1	1	1
Land	NOR	0.670069	0.675309	0.707165	0.679483	0.73858	0.751803	0.736202	0.754335	0.801929	0.770189	0.777798	0.810525	0.822749	0.820165	0.830473	0.815473	0.814803	0.814496	0.849508	0.811358	0.774675
Land	CHN	0.091323	0.111518	0.092513	0.140865	0.156908	0.158177	0.166879	0.177571	0.210353	0.240296	0.26855	0.278284	0.301992	0.342383	0.37076	0.392863	0.397049	0.395067	0.427337	0.477136	0.489359
Land	BRA	0.0952318	0.0647054	0.0823065	0.0640211	0.0530558	0.0468342	0.054587	0.0536314	0.0614025	0.0662473	0.0853992	0.0962766	0.096541	0.0989947	0.091154	0.0916577	0.0900483	0.0781597	0.0998863	0.090873	0.0910248
Land	IND	0.025512	0.0312764	0.0318242	0.0349966	0.0419524	0.0470037	0.0859529	0.0780011	0.069072	0.0757985	0.0868373	0.103799	0.0934681	0.0874688	0.100357	0.0896916	0.125297	0.111211	0.0946711	0.0969256	0.0919227
Land	MEX	0.295013	0.308388	0.283403	0.282871	0.29906	0.294688	0.291943	0.277831	0.267807	0.236723	0.251829	0.267697	0.259569	0.241834	0.245061	0.253871	0.251511	0.250559	0.272776	0.258455	0.260774
Land	RUS	0.0851822	0.0615125	0.0537825	0.0774389	0.107992	0.116107	0.120678	0.112902	0.134145	0.137471	0.178725	0.187914	0.227032	0.221593	0.217926	0.180461	0.185789	0.156091	0.183876	0.159834	0.142235
Land	TUR	0.209875	0.118584	0.150394	0.191844	0.206625	0.198202	0.195876	0.284336	0.294686	0.295699	0.39258	0.402098	0.420707	0.431202	0.459862	0.42977	0.389026	0.40802	0.460741	0.477094	0.442476
Land	IDN	0.185344	0.204151	0.18574	0.155103	0.187026	0.181706	0.197277	0.26362	0.302475	0.289258	0.27915	0.37261	0.264219	0.266533	0.335018	0.294176	0.282067	0.312048	0.337701	0.284832	0.212877
Land	ZAF	0.175284	0.142038	0.161416	0.184734	0.230994	0.253276	0.307103	0.257522	0.30173	0.290086	0.282718	0.346714	0.270361	0.25182	0.248836	0.3135	0.284352	0.263525	0.325758	0.251823	0.176072
Land	WWA	0.191696	0.180052	0.180416	0.18848	0.1968	0.203537	0.235059	0.176994	0.235431	0.222349	0.263119	0.288433	0.280303	0.309332	0.313694	0.317764	0.332505	0.328575	0.348052	0.329505	0.354809
Land	WWL	0.0834896	0.0781176	0.0809129	0.083406	0.0919634	0.0845246	0.0912533	0.0949913	0.106345	0.101802	0.110036	0.109697	0.126538	0.136779	0.129556	0.154358	0.123217	0.120286	0.144775	0.137641	0.122665
Land	WWE	0.150967	0.112066	0.148086	0.239514	0.166974	0.157113	0.14696	0.142004	0.210583	0.157269	0.199008	0.202492	0.22794	0.211678	0.202697	0.180885	0.172314	0.203739	0.262024	0.238404	0.222098
Land	WWF	0.04458	0.0492812	0.0832224	0.0786038	0.0750991	0.0837872	0.0729079	0.0875539	0.0937902	0.100134	0.11948	0.13238	0.120874	0.120361	0.129061	0.131747	0.121686	0.10933	0.112366	0.102025	0.0958841
Land	WWM	0.648179	0.644869	0.693962	0.699944	0.706614	0.768862	0.74069	0.740638	0.799694	0.818246	0.818071	0.819007	0.837253	0.822948	0.834793	0.848427	0.8076	0.820015	0.828377	0.824253	0.807869
Land	Advanced	0.289905	0.2688	0.282768	0.302286	0.305191	0.312452	0.308501	0.284685	0.304292	0.280817	0.291187	0.308082	0.305834	0.301257	0.299367	0.315676	0.296785	0.319097	0.30939	0.307003	0.303224
Land	EmergingDeveloping	0.0447894	0.0434004	0.0399011	0.0445818	0.0461918	0.0453983	0.0484205	0.0525046	0.0640649	0.0673775	0.0751386	0.0747206	0.0808038	0.0850846	0.0873537	0.0905644	0.088332	0.0872967	0.0872331	0.0903724	0.0909812
Land	Global	0	0	0	0	0	0	0	0	0	0	0	0	0	0	0	0	0	0	0	0	0
Acid	AUT	0.544524	0.605209	0.608181	0.607672	0.608436	0.641387	0.65751	0.648424	0.654414	0.601168	0.536486	0.554756	0.550648	0.582781	0.585015	0.556285	0.56184	0.561146	0.590471	0.603806	0.575289
Acid	BEL	0.630866	0.622903	0.614896	0.635279	0.640877	0.716011	0.703278	0.722792	0.756531	0.720401	0.640188	0.693677	0.675603	0.667408	0.68871	0.704508	0.706833	0.727373	0.730674	0.732821	0.723981
Acid	BGR	0.0468392	0.0516729	0.0681978	0.0828897	0.118999	0.144	0.172529	0.249047	0.347797	0.26039	0.271675	0.266286	0.286249	0.310801	0.33818	0.308286	0.31435	0.310025	0.367865	0.381022	0.348171
Acid	CYP	0.0272905	0.020451	0.02195	0.0252957	0.0250634	0.02827	0.0472178	0.0562319	0.102228	0.0645068	0.074057	0.073538	0.067593	0.0655071	0.0945175	0.134028	0.189509	0.243987	0.274967	0.344009	0.402629
Acid	CZE	0.194307	0.200298	0.252616	0.238443	0.290607	0.325277	0.406918	0.409042	0.425071	0.403693	0.39645	0.438934	0.437045	0.451978	0.406679	0.416004	0.395052	0.468481	0.462161	0.452369	0.401388
Acid	DEU	0.424816	0.409315	0.397321	0.409562	0.432496	0.449605	0.468653	0.468365	0.472675	0.452781	0.432038	0.462806	0.430848	0.433073	0.438108	0.441984	0.424891	0.462686	0.476382	0.505212	0.493766
Acid	DNK	0.431062	0.427402	0.470671	0.454824	0.503095	0.56624	0.577842	0.580738	0.622703	0.601125	0.660988	0.690003	0.694961	0.678025	0.726325	0.755394	0.75145	0.757325	0.682427	0.776995	0.617726
Acid	EST	0.0444361	0.0561132	0.0838472	0.0908771	0.123548	0.150251	0.239332	0.230576	0.252069	0.168672	0.157381	0.318455	0.38112	0.315882	0.340795	0.340607	0.33418	0.343995	0.410684	0.504617	0.568392
Acid	ESP	0.361626	0.372026	0.368677	0.392338	0.411891	0.399613	0.429342	0.452897	0.473314	0.410774	0.451915	0.448302	0.417332	0.436696	0.460377	0.436196	0.449725	0.447341	0.416719	0.518899	0.468586
Acid	FIN	0.422268	0.359968	0.396194	0.412545	0.430913	0.498716	0.468255	0.486417	0.557553	0.486057	0.460603	0.522447	0.460691	0.457479	0.465517	0.434969	0.443439	0.465815	0.478903	0.492515	0.453398
Acid	FRA	0.561082	0.550857	0.547167	0.566944	0.583673	0.587217	0.602501	0.605456	0.61699	0.574754	0.535577	0.535368	0.57081	0.552768	0.564113	0.56481	0.561612	0.606636	0.596736	0.599663	0.576949
Acid	GRC	0.278069	0.27188	0.262305	0.297775	0.315367	0.289198	0.308048	0.290741	0.375399	0.274339	0.254394	0.287018	0.282808	0.261482	0.270382	0.308154	0.307382	0.275583	0.304437	0.427883	0.294003
Acid	HRV	0.203172	0.245266	0.28804	0.328706	0.359933	0.384597	0.371293	0.361515	0.425799	0.383359	0.354602	0.372127	0.35033	0.429157	0.420429	0.443077	0.474663	0.506071	0.510444	0.50915	0.482756
Acid	HUN	0.438387	0.447346	0.47705	0.500065	0.5299	0.572497	0.618386	0.649878	0.666423	0.650517	0.574482	0.583795	0.570195	0.569996	0.61405	0.566909	0.562551	0.624458	0.635098	0.604757	0.54281
Acid	IRL	0.632304	0.588431	0.637138	0.616475	0.660493	0.656766	0.682335	0.741479	0.733704	0.713101	0.623734	0.652472	0.620997	0.619328	0.70136	0.809045	0.822938	0.875046	0.860873	0.901196	0.895679
Acid	ITA	0.408823	0.417378	0.418991	0.413297	0.4339	0.437872	0.458837	0.461312	0.466203	0.46945	0.485253	0.492329	0.46272	0.477741	0.49068	0.484897	0.478385	0.481726	0.510863	0.510575	0.480326
Acid	LTU	0.057467	0.0463376	0.10487	0.117756	0.187869	0.371463	0.424618	0.475649	0.549042	0.400356	0.505197	0.616229	0.646215	0.631269	0.629839	0.564717	0.554898	0.592317	0.632757	0.67943	0.60114
Acid	LUX	0.63146	0.577398	0.481628	0.527295	0.611515	0.714972	0.792632	0.801206	0.795207	0.776537	0.684558	0.697279	0.725676	0.739745	0.733164	0.809622	0.751642	0.726015	0.872617	0.868266	0.769499
Acid	LVA	0.0538631	0.0580912	0.0693158	0.0898209	0.145775	0.252792	0.40001	0.468771	0.473665	0.302929	0.271326	0.383494	0.397083	0.428311	0.537144	0.484088	0.467689	0.543465	0.484024	0.519248	0.476732
Acid	MLT	0.111468	0.0481177	0.0338941	0.0685306	0.0757746	0.104104	0.0765292	0.0656015	0.069118	0.068664	0.0579724	0.058987	0.0545218	0.0735991	0.0525025	0.333525	0.573194	0.597838	0.664136	0.704925	0.730656
Acid	NLD	0.616075	0.577502	0.587024	0.610099	0.606647	0.623454	0.632946	0.632476	0.63624	0.622843	0.587318	0.612655	0.629353	0.636667	0.637975	0.697146	0.620732	0.674576	0.716219	0.737956	0.71259
Acid	POL	0.15377	0.157746	0.157357	0.174145	0.181853	0.208888	0.209132	0.235618	0.274913	0.215332	0.241128	0.260765	0.243032	0.238062	0.2657	0.25884	0.262839	0.270761	0.291916	0.326187	0.31196
Acid	PRT	0.344927	0.335817	0.335038	0.371757	0.400107	0.374341	0.404802	0.43565	0.438256	0.379233	0.426354	0.417308	0.37086	0.386691	0.413443	0.418491	0.419459	0.39295	0.437757	0.470632	0.444533
Acid	ROM	0.084421	0.0871503	0.105349	0.136428	0.163769	0.208258	0.243459	0.311075	0.315965	0.256085	0.298525	0.319328	0.298538	0.318922	0.359853	0.366944	0.375534	0.399369	0.423972	0.44989	0.411989
Acid	SWE	0.631353	0.611891	0.599063	0.638613	0.670287	0.676505	0.68682	0.72902	0.715205	0.675504	0.660879	0.696448	0.674743	0.676303	0.701487	0.667237	0.679859	0.664309	0.686813	0.711229	0.688162
Acid	SVN	0.446976	0.505187	0.531578	0.562906	0.672705	0.667355	0.688782	0.650132	0.618352	0.577982	0.437674	0.53622	0.545684	0.494118	0.499102	0.524461	0.535387	0.578395	0.61238	0.618123	0.527981
Acid	SVK	0.278032	0.299939	0.314396	0.350054	0.438205	0.500217	0.566412	0.630053	0.640818	0.594236	0.573095	0.590392	0.619962	0.634501	0.58363	0.619208	0.507026	0.584458	0.59391	0.640631	0.571343
Acid	GBR	0.418209	0.415881	0.422927	0.424198	0.452069	0.463761	0.493342	0.488256	0.50083	0.473655	0.489818	0.515505	0.47661	0.48267	0.521955	0.52963	0.558476	0.573707	0.595732	0.651431	0.608475
Acid	USA	0.194823	0.208787	0.223555	0.227875	0.237477	0.247401	0.26432	0.259009	0.233378	0.230394	0.229019	0.238129	0.238907	0.231048	0.246453	0.26235	0.244733	0.263195	0.271144	0.382565	0.261273
Acid	JPN	0.306036	0.29177	0.272287	0.298093	0.322764	0.325381	0.35783	0.349688	0.377102	0.323032	0.348482	0.376986	0.354543	0.333049	0.345357	0.318917	0.295143	0.327648	0.349963	0.378041	0.335105
Acid	CAN	0.434972	0.409325	0.365143	0.393958	0.410817	0.454688	0.451122	0.445342	0.46563	0.426862	0.390616	0.371647	0.415082	0.387603	0.458568	0.501824	0.367134	0.381703	0.869423	-0.14925	0.334878
Acid	KOR	0.329921	0.297964	0.307484	0.330314	0.367861	0.411136	0.440102	0.452949	0.479521	0.386412	0.378931	0.421401	0.420319	0.396895	0.395438	0.354166	0.343022	0.37803	0.36359	0.387173	0.361479
Acid	AUS	0.179098	0.141432	0.171602	0.190006	0.228952	0.251034	0.253454	0.280428	0.305748	0.246532	0.294955	0.347877	0.31637	0.303311	0.307971	0.292657	0.263657	0.328216	0.272643	0.292041	0.292866
Acid	CHE	0.653272	0.636344	0.656723	0.651769	0.665666	0.702555	0.715385	0.753938	0.777741	0.77711	0.810026	0.866954	0.818977	0.816088	0.753481	0.778358	0.755045	0.731695	0.679644	0.699826	0.745841
Acid	TWN	0.344829	0.276646	0.254902	0.248329	0.301624	0.329203	0.317487	0.305471	0.31026	0.23636	0.351981	0.338318	0.310826	0.324545	0.322938	0.288652	0.285486	0.279351	0.283952	0.310225	0.254274
Acid	NOR	0.420556	0.418998	0.422616	0.440984	0.445552	0.49157	0.482062	0.492907	0.537872	0.482895	0.545184	0.587415	0.570625	0.550705	0.605189	0.493379	0.576865	0.551923	0.53054	0.564631	0.558587
Acid	CHN	0.0764485	0.0762973	0.0838878	0.0850058	0.0800083	0.077981	0.0735655	0.0708202	0.0844018	0.0744937	0.0781673	0.0852071	0.0791007	0.0828329	0.0864266	0.0898127	0.0845328	0.0922144	0.0934768	0.0937976	0.0884462
Acid	BRA	0.239839	0.278113	0.315864	0.319849	0.291958	0.27215	0.282274	0.281304	0.350189	0.328848	0.327772	0.365246	0.357191	0.351629	0.349318	0.264587	0.261239	0.280479	0.318589	0.350882	0.303233
Acid	IND	0.0607961	0.0559056	0.0694795	0.0734221	0.0985994	0.1362	0.14208	0.149655	0.161902	0.154351	0.164488	0.184904	0.166109	0.135978	0.127009	0.126336	0.122589	0.145475	0.135865	0.137757	0.120866
Acid	MEX	0.334714	0.310392	0.305874	0.280464	0.292014	0.305636	0.319419	0.320785	0.339258	0.258898	0.268254	0.291596	0.284977	0.286845	0.302882	0.306101	0.313663	0.322411	0.34012	0.365938	0.403191
Acid	RUS	0.0582775	0.0557844	0.0646702	0.0754368	0.0928901	0.0926263	0.101206	0.12609	0.147997	0.108599	0.140971	0.1559	0.156198	0.168406	0.167615	0.119975	0.107644	0.129675	0.131273	0.124321	0.11033
Acid	TUR	0.281323	0.24297	0.25988	0.26888	0.325576	0.338101	0.330337	0.331775	0.338092	0.285343	0.30705	0.335443	0.364958	0.400819	0.418311	0.382531	0.270859	0.281915	0.24724	0.242652	0.251058
Acid	IDN	0.15361	0.148557	0.15193	0.120685	0.152775	0.160898	0.158255	0.187179	0.226566	0.159883	0.215485	0.248629	0.210561	0.21598	0.219687	0.193344	0.134298	0.200902	0.180427	0.19429	0.170367
Acid	ZAF	0.067939	0.0601135	0.0609715	0.0726123	0.0806654	0.0927534	0.121321	0.123439	0.109899	0.0918143	0.101703	0.125642	0.102373	0.108792	0.103886	0.105168	0.0902919	0.0996653	0.114347	0.107415	0.0663635
Acid	WWA	0.488978	0.45675	0.482457	0.478143	0.514079	0.568753	0.593692	0.518526	0.573969	0.525455	0.548138	0.604598	0.576524	0.591355	0.602887	0.595347	0.56236	0.590152	0.565309	0.561388	0.535426
Acid	WWL	0.347645	0.356779	0.351609	0.33274	0.34503	0.329604	0.355513	0.401158	0.427683	0.356906	0.419679	0.419189	0.436126	0.430222	0.42005	0.457942	0.408354	0.438736	0.446269	0.460246	0.425641
Acid	WWE	0.193323	0.209622	0.227214	0.231541	0.262738	0.276265	0.281823	0.328123	0.337599	0.296302	0.382773	0.390073	0.378503	0.372746	0.348233	0.330547	0.334638	0.380106	0.355178	0.391647	0.346745
Acid	WWF	0.297451	0.324413	0.349518	0.351076	0.339584	0.364841	0.376215	0.453245	0.480804	0.464519	0.504028	0.505264	0.492052	0.491797	0.47125	0.45103	0.45969	0.495856	0.451961	0.451235	0.441756
Acid	WWM	0.228636	0.221417	0.224949	0.227666	0.230173	0.254663	0.268132	0.300579	0.306028	0.290131	0.30071	0.302555	0.311574	0.316135	0.310074	0.294005	0.280989	0.303072	0.285247	0.315974	0.273502
Acid	Advanced	0.149383	0.153056	0.162827	0.176182	0.191173	0.203873	0.224932	0.225105	0.221081	0.203124	0.20757	0.227458	0.216895	0.211958	0.21984	0.216797	0.203129	0.228597	0.224044	0.24444	0.238479
Acid	EmergingDeveloping	0.0774799	0.0690659	0.0685736	0.0638449	0.0671335	0.0686257	0.0693379	0.0699716	0.0803304	0.066642	0.0726582	0.0712748	0.0700354	0.069723	0.0661305	0.0660502	0.0634687	0.0644149	0.0669151	0.0737821	0.0541082
Acid	Global	0	0	0	0	0	0	0	0	-2.22045e-16	0	0	0	0	0	0	0	0	0	0	0	0
Water	AUT	0.983145	0.986751	0.988277	0.985974	0.988455	0.992075	0.991657	0.985924	0.987348	0.983914	0.980919	0.982471	0.981277	0.976806	0.980826	0.976993	0.978321	0.978733	0.980005	0.981472	0.979532
Water	BEL	0.986286	0.986971	0.986509	0.987652	0.989106	0.990443	0.989095	0.989581	0.992018	0.99074	0.979738	0.980211	0.984744	0.982446	0.985874	0.988438	0.985049	0.985678	0.988134	0.985465	0.986238
Water	BGR	0.216518	0.296565	0.483202	0.488032	0.635862	0.752073	0.710488	0.669277	0.767493	0.75487	0.662505	0.661514	0.695472	0.670224	0.744933	0.621773	0.597435	0.632812	0.751065	0.792532	0.745464
Water	CYP	0.00510272	0.00391286	0.00516522	0.00634751	0.00684477	0.00753416	0.0152554	0.0200508	0.300004	0.104984	0.0463688	0.0572203	0.0885686	0.0658927	0.115071	0.231508	0.228538	0.368743	0.470814	0.561133	0.615469
Water	CZE	0.967402	0.97245	0.978299	0.97215	0.982523	0.983639	0.977183	0.981649	0.980858	0.97791	0.968152	0.973385	0.976419	0.970576	0.969775	0.968071	0.969596	0.970163	0.965748	0.965727	0.961874
Water	DEU	0.99101	0.990964	0.989721	0.98994	0.991298	0.99167	0.992541	0.992915	0.992444	0.992148	0.990695	0.991919	0.992704	0.989987	0.990766	0.99022	0.989587	0.99165	0.988383	0.990705	0.990888
Water	DNK	0.983091	0.986608	0.991645	0.990225	0.986526	0.989168	0.992554	0.991922	0.99385	0.995189	0.991921	0.994594	0.992297	0.989767	0.992834	0.99252	0.994008	0.993235	0.983906	0.993494	0.991738
Water	EST	0.826009	0.939776	0.953136	0.958685	0.96503	0.97466	0.98495	0.980707	0.977029	0.966514	0.976034	0.985125	0.987937	0.986102	0.9876	0.9861	0.985976	0.984029	0.986232	0.975667	0.972565
Water	ESP	0.239423	0.26543	0.258221	0.295554	0.328321	0.212865	0.259509	0.301979	0.32918	0.264559	0.262999	0.263699	0.284565	0.271829	0.280885	0.294879	0.303407	0.329151	0.301501	0.322956	0.251017
Water	FIN	0.834491	0.846958	0.81057	0.850621	0.873471	0.845543	0.826642	0.865627	0.869123	0.857397	0.853724	0.844523	0.852125	0.820115	0.866121	0.806851	0.799334	0.790371	0.779533	0.782216	0.723857
Water	FRA	0.924532	0.919164	0.912517	0.90472	0.918675	0.914002	0.911083	0.933557	0.932125	0.903553	0.877701	0.898787	0.916274	0.905891	0.919003	0.900229	0.889354	0.905592	0.899018	0.897833	0.889408
Water	GRC	0.202175	0.207174	0.314641	0.317011	0.328464	0.324738	0.330032	0.300721	0.388848	0.416355	0.379363	0.358039	0.320697	0.283405	0.338694	0.326407	0.293472	0.336744	0.441593	0.471619	0.406675
Water	HRV	0.979377	0.980773	0.980251	0.977436	0.981109	0.982857	0.980176	0.977634	0.986425	0.981091	0.974753	0.967513	0.96543	0.959624	0.97149	0.963149	0.967366	0.964425	0.969742	0.980692	0.968193
Water	HUN	0.938959	0.965244	0.959531	0.958812	0.967472	0.978183	0.97716	0.961148	0.978295	0.97412	0.974529	0.959609	0.9459	0.944854	0.968759	0.950639	0.971376	0.968991	0.968789	0.971444	0.973041
Water	IRL	0.994002	0.993336	0.983739	0.991197	0.992654	0.994966	0.996027	0.995636	0.996675	0.994337	0.987283	0.989737	0.993244	0.992421	0.985838	0.996814	0.996549	0.997432	0.996698	0.998071	0.99782
Water	ITA	0.840546	0.840899	0.850984	0.80624	0.817215	0.792797	0.816236	0.780218	0.796543	0.80517	0.771463	0.747686	0.691484	0.684545	0.734987	0.70203	0.72675	0.714963	0.749745	0.722403	0.712476
Water	LTU	0.480883	0.790769	0.926822	0.934285	0.958205	0.974234	0.979064	0.977181	0.981224	0.968315	0.96491	0.966732	0.988886	0.981697	0.98944	0.975931	0.977231	0.976891	0.985722	0.990059	0.98629
Water	LUX	0.999763	0.999632	0.999681	0.999579	0.999682	0.999656	0.999769	0.999832	0.999779	0.99985	0.999644	0.999678	0.999866	0.99973	0.999842	0.999837	0.999813	0.999783	0.99964	0.999867	0.999887
Water	LVA	0.630879	0.922424	0.888105	0.951653	0.971625	0.98595	0.995959	0.998528	0.998024	0.992559	0.983895	0.99028	0.996724	0.992182	0.997599	0.997627	0.999066	0.999326	0.998831	0.999172	0.999459
Water	MLT	0.579243	0.33137	0.207256	0.376607	0.443034	0.466455	0.391066	0.303758	0.358324	0.307563	0.243191	0.272794	0.299182	0.197358	0.14817	0.7213	0.919987	0.907144	0.930983	0.945022	0.944632
Water	NLD	0.979802	0.981674	0.984159	0.988803	0.986294	0.989995	0.989024	0.988044	0.987793	0.989653	0.981073	0.976429	0.989156	0.985157	0.985812	0.993411	0.990423	0.993851	0.992983	0.992334	0.993404
Water	POL	0.966459	0.971454	0.968363	0.966695	0.972104	0.967907	0.962717	0.966985	0.972748	0.967162	0.96497	0.965177	0.971017	0.965579	0.972969	0.977964	0.9682	0.972686	0.970409	0.975276	0.973727
Water	PRT	0.55854	0.557101	0.55321	0.489944	0.513287	0.441596	0.486865	0.593327	0.581988	0.455993	0.428495	0.520027	0.443254	0.399185	0.507322	0.418742	0.430961	0.452991	0.521489	0.495283	0.459435
Water	ROM	0.558149	0.670414	0.666112	0.71363	0.864712	0.902174	0.857711	0.818529	0.878976	0.860607	0.900863	0.869935	0.814847	0.840588	0.927011	0.862344	0.870536	0.891424	0.922259	0.911406	0.906996
Water	SWE	0.988409	0.988307	0.98917	0.988654	0.98862	0.98817	0.992064	0.992521	0.991446	0.992741	0.991958	0.992623	0.99382	0.994159	0.993768	0.990396	0.989759	0.992488	0.989513	0.99101	0.991688
Water	SVN	0.981794	0.991396	0.991445	0.989191	0.997803	0.996413	0.997309	0.990794	0.990118	0.991946	0.985702	0.991693	0.995007	0.990598	0.982673	0.988615	0.991222	0.994227	0.996348	0.997281	0.989502
Water	SVK	0.944288	0.963115	0.966099	0.974506	0.98518	0.984993	0.983185	0.983437	0.985811	0.984916	0.982878	0.982468	0.98423	0.982812	0.986002	0.98751	0.98412	0.983774	0.983426	0.982378	0.977846
Water	GBR	0.985086	0.986802	0.986203	0.987474	0.990141	0.99237	0.992623	0.992592	0.992872	0.991723	0.990321	0.990826	0.991729	0.989531	0.990078	0.989873	0.988795	0.988751	0.987251	0.989985	0.988375
Water	USA	0.413873	0.460918	0.434654	0.452302	0.485176	0.494079	0.496328	0.518204	0.478614	0.529484	0.41301	0.472118	0.398651	0.39725	0.432974	0.495204	0.443879	0.481389	0.464412	0.487247	0.502228
Water	JPN	0.992534	0.992486	0.99232	0.991584	0.992875	0.993274	0.993761	0.99326	0.993397	0.99154	0.990717	0.991988	0.991794	0.990706	0.99052	0.987832	0.984947	0.987142	0.986468	0.98778	0.98584
Water	CAN	0.925337	0.930902	0.927136	0.919276	0.939072	0.937173	0.941893	0.939399	0.932226	0.934412	0.93563	0.931621	0.93567	0.926984	0.928408	0.922618	0.924692	0.918841	0.910378	0.926228	0.926068
Water	KOR	0.984138	0.985445	0.991242	0.986668	0.989368	0.989254	0.990445	0.99193	0.990466	0.986619	0.987809	0.991019	0.991341	0.991406	0.988507	0.986855	0.986617	0.987918	0.988164	0.987396	0.987339
Water	AUS	0.27106	0.181433	0.197838	0.283193	0.387673	0.363174	0.394213	0.517006	0.630807	0.509122	0.497951	0.583015	0.457701	0.373734	0.403592	0.43363	0.393684	0.45422	0.363185	0.454136	0.425869
Water	CHE	0.99842	0.998491	0.998451	0.998442	0.998465	0.998429	0.998481	0.998442	0.998794	0.998778	0.998427	0.998618	0.998681	0.998494	0.998266	0.99826	0.998088	0.99856	0.997904	0.998093	0.99806
Water	TWN	0.867605	0.804807	0.805705	0.845067	0.838709	0.886614	0.870916	0.852441	0.829646	0.8215	0.825476	0.786466	0.793258	0.810061	0.790893	0.73076	0.729221	0.711565	0.661271	0.72194	0.711348
Water	NOR	0.975891	0.982135	0.977863	0.983757	0.97726	0.98003	0.982949	0.982552	0.994686	0.987777	0.984886	0.994433	0.996063	0.993985	0.994621	0.986589	0.986832	0.990613	0.993007	0.988949	0.984418
Water	CHN	0.0924829	0.115197	0.141817	0.174986	0.219623	0.225334	0.24959	0.245482	0.268672	0.25091	0.325661	0.352826	0.427354	0.407086	0.384253	0.349292	0.340765	0.338237	0.378864	0.397568	0.379881
Water	BRA	0.614694	0.548474	0.544176	0.501618	0.503064	0.451517	0.504082	0.538624	0.582069	0.547903	0.572303	0.614095	0.617971	0.602616	0.607445	0.553034	0.521139	0.544077	0.556476	0.574978	0.604157
Water	IND	0.0251396	0.0345766	0.0329879	0.0330999	0.0375521	0.0393876	0.0453956	0.054688	0.0440954	0.0444958	0.0451436	0.0498482	0.0538465	0.0436633	0.0566532	0.0515259	0.0575223	0.0527533	0.052293	0.0640939	0.0607009
Water	MEX	0.207073	0.233222	0.231651	0.216985	0.219029	0.201907	0.230931	0.247455	0.22105	0.212248	0.196726	0.20825	0.210563	0.184885	0.184839	0.207184	0.199255	0.189911	0.18314	0.181212	0.183588
Water	RUS	0.897257	0.878107	0.82647	0.883374	0.912614	0.928001	0.934143	0.940508	0.942799	0.933241	0.939413	0.938641	0.952767	0.95225	0.940745	0.927999	0.921505	0.90916	0.91255	0.916197	0.897678
Water	TUR	0.616872	0.429756	0.535104	0.485515	0.506633	0.53688	0.584083	0.590686	0.552904	0.607915	0.741022	0.677951	0.642801	0.715434	0.78829	0.743333	0.67138	0.651128	0.704979	0.718085	0.775059
Water	IDN	0.149497	0.15593	0.160596	0.135108	0.162781	0.145595	0.181188	0.252425	0.233497	0.17031	0.16088	0.248979	0.235457	0.176765	0.214888	0.180731	0.13698	0.204056	0.258976	0.177362	0.135731
Water	ZAF	0.13757	0.133643	0.189446	0.156312	0.191316	0.191074	0.315237	0.249548	0.258599	0.227496	0.232671	0.312086	0.262464	0.267135	0.244749	0.216588	0.267864	0.244036	0.249176	0.214066	0.182099
Water	WWA	0.218362	0.25009	0.269166	0.279987	0.264983	0.262154	0.352982	0.288946	0.312288	0.220368	0.355203	0.382803	0.367992	0.385291	0.3889	0.362806	0.359203	0.332392	0.366884	0.336002	0.326172
Water	WWL	0.506066	0.535267	0.521993	0.555293	0.555969	0.558178	0.585979	0.649139	0.579614	0.501185	0.53121	0.577918	0.611079	0.61766	0.583729	0.647627	0.613483	0.650417	0.653875	0.611559	0.574673
Water	WWE	0.725929	0.761488	0.739571	0.867171	0.869345	0.80864	0.833728	0.76485	0.861209	0.834678	0.833139	0.839709	0.852078	0.859561	0.830438	0.853614	0.856435	0.866994	0.871014	0.857641	0.872879
Water	WWF	0.161349	0.16578	0.333408	0.315577	0.265203	0.242694	0.229471	0.318338	0.319878	0.287041	0.319535	0.357714	0.386796	0.321473	0.3333	0.321717	0.288787	0.296471	0.240201	0.282046	0.273694
Water	WWM	0.0778971	0.101418	0.103879	0.113669	0.112535	0.105953	0.159451	0.176437	0.213308	0.180739	0.175682	0.196689	0.259347	0.234649	0.235682	0.203545	0.179714	0.191728	0.233796	0.238961	0.213806
Water	Advanced	0.575614	0.586744	0.574006	0.594802	0.631425	0.608044	0.632661	0.640682	0.645692	0.636469	0.573514	0.579467	0.545262	0.544274	0.572509	0.581599	0.545714	0.571595	0.558742	0.577624	0.576069
Water	EmergingDeveloping	0.0209944	0.0229493	0.0249814	0.0213838	0.0229338	0.0231705	0.0278041	0.0296385	0.0258929	0.0310674	0.0315823	0.0398128	0.0443565	0.0397736	0.0359492	0.0414123	0.042628	0.0420094	0.0467878	0.0431302	0.0402152
Water	Global	0	0	0	0	0	0	0	0	0	0	0	0	0	0	0	0	0	0	0	0	0
Nitrogen	AUT	0.497633	0.52661	0.539847	0.631613	0.622072	0.638933	0.650598	0.67075	0.613477	0.691469	0.704932	0.66152	0.723504	0.673143	0.748633	0.664092	0.665946	0.7422	0.722176	0.884518	0.751152
Nitrogen	BEL	0.733382	0.745935	0.746541	0.76838	0.793774	0.812485	0.808627	0.846605	0.852891	0.800223	0.7664	0.794674	0.815873	0.805166	0.772007	0.829028	0.819317	0.842803	0.887328	0.859013	0.873491
Nitrogen	BGR	0.0768552	0.0596205	0.0466753	0.0496563	0.0662648	0.0885289	0.129638	0.133675	0.182077	0.114977	0.163517	0.149266	0.165952	0.364766	0.225641	0.220391	0.183849	0.22144	0.248088	0.288589	0.317765
Nitrogen	CYP	0.151134	0.0642973	0.0452523	0.0334341	0.0371119	0.037852	0.0682902	0.0957085	0.423308	0.136661	0.108511	0.13581	0.134921	0.139415	0.224564	0.301596	0.39407	0.632853	0.589656	0.732682	0.787043
Nitrogen	CZE	0.157249	0.128338	0.206673	0.228513	0.279151	0.32268	0.312733	0.337508	0.357652	0.353099	0.343551	0.409568	0.312117	0.337924	0.493335	0.325853	0.285155	0.383769	0.339538	0.401405	0.426253
Nitrogen	DEU	0.383451	0.396485	0.401428	0.427535	0.439258	0.431935	0.499672	0.475003	0.512936	0.507839	0.478689	0.517907	0.510877	0.508201	0.508297	0.54675	0.512954	0.576795	0.605713	0.605294	0.618018
Nitrogen	DNK	0.253428	0.27509	0.371792	0.448576	0.390472	0.441538	0.53302	0.51946	0.568233	0.562043	0.581873	0.560718	0.500503	0.58648	0.512934	0.549845	0.483441	0.420165	0.509769	0.537214	0.49598
Nitrogen	EST	0.134968	0.176044	0.268184	0.23597	0.248335	0.314014	0.343831	0.376187	0.279795	0.322113	0.312217	0.50801	0.5005	0.396058	0.534508	0.417802	0.381707	0.363667	0.343758	0.483661	0.500568
Nitrogen	ESP	0.267294	0.297525	0.347697	0.318608	0.367593	0.404536	0.38821	0.415763	0.492878	0.431773	0.407702	0.457707	0.453125	0.392099	0.401505	0.413239	0.405121	0.445957	0.437238	0.440833	0.392612
Nitrogen	FIN	0.28978	0.285501	0.351914	0.344767	0.361582	0.356706	0.372459	0.395459	0.390168	0.392971	0.352886	0.424766	0.413767	0.400347	0.427117	0.413046	0.361701	0.406214	0.403954	0.386335	0.492544
Nitrogen	FRA	0.252303	0.248997	0.270485	0.28765	0.305729	0.302736	0.309036	0.309278	0.365976	0.362266	0.365014	0.402433	0.543338	0.390886	0.415991	0.435444	0.390211	0.419048	0.428603	0.429282	0.427403
Nitrogen	GRC	0.255199	0.29934	0.353124	0.349939	0.352055	0.375111	0.396793	0.398847	0.473539	0.478302	0.449423	0.494715	0.467628	0.459087	0.436705	0.432919	0.375224	0.41488	0.462039	0.460068	0.392544
Nitrogen	HRV	1	1	1	1	1	1	0.099946	0.10193	0.0960413	0.220938	0.156799	0.153458	0.181966	0.238339	0.241061	0.267132	0.248787	0.257696	0.253917	0.344682	0.30482
Nitrogen	HUN	0.110874	0.124011	0.167546	0.227319	0.211446	0.226806	0.276577	0.279383	0.27415	0.318603	0.326641	0.266249	0.255128	0.262492	0.273601	0.275236	0.215224	0.295016	0.22615	0.277837	0.293783
Nitrogen	IRL	0.365383	0.372303	0.298869	0.343538	0.427212	0.51859	0.53679	0.643036	0.634446	0.531312	0.424056	0.502836	0.503807	0.445683	0.482176	0.657011	0.727981	0.733376	0.672842	0.839484	0.77486
Nitrogen	ITA	0.459818	0.497551	0.490868	0.526821	0.521128	0.528931	0.571652	0.556944	0.585714	0.625792	0.634589	0.639757	0.58506	0.554161	0.586639	0.590436	0.569803	0.620314	0.611569	0.582751	0.589497
Nitrogen	LTU	0.0241867	0.0144965	0.0485824	0.0509093	0.0717164	0.104162	0.12188	0.151303	0.212476	0.155343	0.176208	0.199036	0.373336	0.238822	0.253757	0.251183	0.325236	0.209167	0.26646	0.245402	0.234252
Nitrogen	LUX	0.803876	0.758808	0.791068	0.724541	0.743736	0.773775	0.826814	0.888075	0.8225	0.843009	0.866604	0.867778	0.900395	0.906274	0.932778	0.93872	0.922807	0.896569	0.890517	0.930282	0.949448
Nitrogen	LVA	0.0784073	0.0519575	0.0539587	0.0673075	0.116739	0.17941	0.233418	0.265899	0.289379	0.227263	0.205662	0.251248	0.415001	0.227174	0.250111	0.321103	0.397717	0.313922	0.254696	0.311251	0.858689
Nitrogen	MLT	0.657648	0.368786	0.18399	0.319303	0.373781	0.350337	0.255805	0.272941	0.376225	0.29834	0.188994	0.224662	0.206332	0.230088	0.156116	0.657804	0.857866	0.903492	0.943129	0.97544	0.964751
Nitrogen	NLD	0.727067	0.751346	0.769445	0.796875	0.79892	0.825766	0.808379	0.849527	0.861114	0.870796	0.807379	0.847581	0.86221	0.883099	0.885091	0.885811	0.851546	0.890086	0.888993	0.872681	0.900133
Nitrogen	POL	0.0993713	0.0998827	0.125698	0.121201	0.121117	0.111346	0.122275	0.142624	0.168607	0.156846	0.168098	0.182902	0.660354	0.193472	0.796492	0.259554	0.630969	0.478677	0.282903	0.422546	0.411161
Nitrogen	PRT	0.47411	0.510194	0.557197	0.575295	0.592246	0.574882	0.565234	0.551414	0.569857	0.558524	0.595886	0.616142	0.541462	0.537517	0.539302	0.53723	0.54037	0.633535	0.615991	0.608842	0.602378
Nitrogen	ROM	0.0914398	0.0821942	0.0838664	0.134655	0.150383	0.113214	0.157353	0.237949	0.257788	0.228607	0.27952	0.297175	0.275327	0.954898	0.381406	0.339375	0.357298	0.341304	0.360756	0.370485	0.375677
Nitrogen	SWE	0.437235	0.439	0.476765	0.51115	0.497881	0.517091	0.552106	0.537575	0.542427	0.582286	0.588539	0.592517	0.632153	0.636028	0.639156	0.567269	0.535371	0.558721	0.575222	0.596333	0.558836
Nitrogen	SVN	0.360403	0.32866	0.328204	0.379865	0.419483	0.430508	0.448426	0.480285	0.555139	0.493071	0.488316	0.548	0.625136	0.60445	0.545055	0.556437	0.540442	0.64469	0.632802	0.6618	0.653476
Nitrogen	SVK	0.184742	0.203031	0.201213	0.277165	0.329766	0.379785	0.415481	0.478289	0.497831	0.486647	0.515435	0.552077	0.548678	0.546945	0.575815	0.566267	0.467431	0.827373	0.289994	0.319674	0.428066
Nitrogen	GBR	0.498773	0.492215	0.495263	0.529613	0.559852	0.599498	0.620312	0.592971	0.591629	0.574101	0.570743	0.571619	0.59421	0.594011	0.599988	0.638067	0.585842	0.610252	0.62103	0.594869	0.599252
Nitrogen	USA	0.213947	0.229153	0.229599	0.228843	0.244108	0.247382	0.232842	0.261538	0.265774	0.226679	0.230976	0.235428	0.2479	0.238183	0.290066	0.28528	0.245356	0.26499	0.240049	0.251423	0.26342
Nitrogen	JPN	0.820964	0.82449	0.819498	0.855125	0.870094	0.864537	0.864932	0.869559	0.903228	0.873678	0.864487	0.881002	0.887397	0.897293	0.951596	0.944724	0.843526	0.864811	0.864465	0.878433	0.885151
Nitrogen	CAN	0.298316	0.341329	0.309563	0.338602	0.361645	0.332191	0.427829	0.365939	0.353887	0.349869	0.337614	0.305785	0.325711	0.340941	0.336816	0.344647	0.305556	0.340428	0.319515	0.331269	0.313088
Nitrogen	KOR	0.612313	0.667165	0.726666	0.707063	0.708634	0.692509	0.780237	0.797403	0.794431	0.818366	0.837	0.845187	0.859882	0.875001	0.922271	0.911397	0.812464	0.837234	0.82734	0.825905	0.835172
Nitrogen	AUS	0.27111	0.227036	0.251579	0.292775	0.319314	0.350973	0.405588	0.458832	0.483128	0.436553	0.423919	0.472754	0.457497	0.402496	0.405369	0.474998	0.334828	0.442935	0.327577	0.391758	0.300204
Nitrogen	CHE	0.748633	0.717785	0.810357	0.813777	0.811015	0.779258	0.805262	0.799269	0.81234	0.83066	0.855798	0.890396	0.904901	0.890785	0.876443	0.889525	0.866076	0.897116	0.878418	0.896593	0.907521
Nitrogen	TWN	1	1	1	1	1	1	1	1	1	1	1	1	1	1	1	1	1	1	1	1	1
Nitrogen	NOR	0.428694	0.456953	0.50919	0.472553	0.526064	0.514506	0.504078	0.543484	0.580083	0.562691	0.632417	0.629377	0.638054	0.668503	0.6817	0.673503	0.6061	0.635583	0.655474	0.613628	0.587
Nitrogen	CHN	0.0295609	0.0362259	0.0312535	0.0403764	0.0448363	0.044969	0.0498935	0.0545587	0.0584934	0.0677265	0.0776247	0.0881323	0.0996002	0.111363	0.16115	0.16648	0.117058	0.139368	0.148603	0.173613	0.220989
Nitrogen	BRA	0.133993	0.122824	0.112247	0.10122	0.0703446	0.0746984	0.0962863	0.0860465	0.102239	0.115498	0.136504	0.124002	0.136562	0.135275	0.12385	0.138996	0.107825	0.0874641	0.100342	0.0985798	0.084301
Nitrogen	IND	0.015371	0.0210998	0.0253917	0.0232109	0.0278641	0.0272846	0.0357287	0.0345047	0.0309703	0.0354135	0.040094	0.0425915	0.0455857	0.0425581	0.0568662	0.0509938	0.0439639	0.0527769	0.0382612	0.0371419	0.0386549
Nitrogen	MEX	0.287821	0.330075	0.384256	0.376148	0.413221	0.336977	0.394384	0.387136	0.413961	0.370697	0.401769	0.395045	0.385835	0.339354	0.364794	0.433099	0.346771	0.366118	0.412105	0.447243	0.404785
Nitrogen	RUS	0.392126	0.315829	0.302311	0.409787	0.474787	0.443612	0.485292	0.484416	0.454424	0.438157	0.519458	0.52244	0.580889	0.633615	0.597951	0.505632	0.431395	0.491747	0.475775	0.464197	0.458738
Nitrogen	TUR	0.112199	0.0982871	0.122217	0.130417	0.141958	0.135702	0.159042	0.187943	0.241433	0.167433	0.246127	0.255957	0.262227	0.233583	0.260601	0.249182	0.163352	0.222128	0.232536	0.236632	0.215349
Nitrogen	IDN	0.0962351	0.109074	0.123779	0.0832609	0.105984	0.0861308	0.0939042	0.142572	0.122723	0.0956225	0.11602	0.170485	0.132935	0.127958	0.157644	0.162815	0.0935333	0.133527	0.137671	0.123573	0.0840217
Nitrogen	ZAF	0.130091	0.125568	0.157124	0.18937	0.209108	0.252227	0.27059	0.262496	0.251346	0.246457	0.272663	0.316231	0.281292	0.291292	0.283718	0.321016	0.311491	0.229617	0.225952	0.198278	0.147606
Nitrogen	WWA	0.217942	0.229805	0.246105	0.248961	0.253144	0.24552	0.301278	0.263989	0.300256	0.245537	0.309674	0.342964	0.35384	0.359308	0.402805	0.445323	0.307061	0.332287	0.321791	0.35283	0.345727
Nitrogen	WWL	0.261637	0.277903	0.31624	0.274839	0.269597	0.282824	0.30449	0.317227	0.319186	0.319204	0.30239	0.306823	0.326263	0.355066	0.371554	0.439236	0.341572	0.338353	0.336311	0.327922	0.283944
Nitrogen	WWE	0.199981	0.138045	0.188883	0.358468	0.27897	0.21057	0.177908	0.190867	0.216416	0.175522	0.212188	0.213471	0.221033	0.231489	0.234038	0.188615	0.164001	0.21803	0.225042	0.227838	0.213136
Nitrogen	WWF	0.34579	0.375901	0.471819	0.482227	0.437197	0.405283	0.398841	0.496867	0.492013	0.495239	0.476514	0.519022	0.48042	0.442776	0.450942	0.455428	0.408284	0.367026	0.363181	0.354127	0.313981
Nitrogen	WWM	0.370331	0.378059	0.380182	0.426738	0.428778	0.435651	0.471474	0.524974	0.580991	0.57927	0.630963	0.645781	0.683182	0.713284	0.732971	0.723671	0.683453	0.660814	0.66629	0.655167	0.63087
Nitrogen	Advanced	0.227698	0.22384	0.232618	0.233208	0.245036	0.24663	0.258889	0.259007	0.269903	0.248846	0.23985	0.248498	0.251996	0.26886	0.367107	0.344341	0.212747	0.244837	0.218163	0.24001	0.260762
Nitrogen	EmergingDeveloping	0.0457869	0.0430526	0.0390132	0.0426161	0.0441031	0.0414317	0.0432596	0.0476821	0.0512505	0.0513199	0.0592357	0.0604868	0.0686092	0.0701822	0.0771646	0.0788105	0.0795748	0.0735632	0.0721515	0.0700229	0.0765595
Nitrogen	Global	0	0	0	0	0	-2.22045e-16	0	0	-2.22045e-16	-2.22045e-16	0	0	-2.22045e-16	0	0	0	0	-2.22045e-16	0	-2.22045e-16	0
Phosphorus	AUT	0.491683	0.483357	0.492939	0.521527	0.554378	0.562301	0.612781	0.591111	0.509531	0.715526	0.71079	0.649314	0.693861	0.653441	0.657596	0.656851	0.639941	0.677465	0.68946	0.750417	0.660818
Phosphorus	BEL	0.757752	0.744131	0.714837	0.727461	0.71427	0.733718	0.738872	0.769809	0.8844	0.822925	0.810685	0.839223	0.862733	0.854274	0.876525	0.904188	0.910727	0.925864	0.94741	0.931682	0.951559
Phosphorus	BGR	0.558957	0.165399	0.0781224	0.0480614	0.312257	0.172305	0.105878	0.0885789	0.0911592	0.171833	0.278525	0.20111	0.180224	0.230322	0.220639	0.17924	0.12907	0.211946	0.164794	0.203036	0.214834
Phosphorus	CYP	0.113076	0.0482676	0.0282957	0.0222272	0.0294943	0.0257921	0.0500789	0.066321	0.286636	0.0613466	0.0795337	0.132596	0.0902848	0.0882406	0.135068	0.162677	0.228099	0.553606	0.409424	0.602907	0.723513
Phosphorus	CZE	0.280006	0.252711	0.297473	0.322651	0.401206	0.436365	0.388109	0.400566	0.478222	0.49054	0.461357	0.502732	0.505338	0.542602	0.49099	0.469863	0.481912	0.469844	0.45282	0.457905	0.478747
Phosphorus	DEU	0.536223	0.514986	0.521948	0.588525	0.608867	0.605922	0.644165	0.585587	0.679108	0.601166	0.582577	0.625299	0.615083	0.586073	0.573381	0.608896	0.654705	0.712743	0.701686	0.656369	0.713957
Phosphorus	DNK	0.450557	0.488406	0.55843	0.640271	0.491	0.520177	0.726033	0.609293	0.666397	0.779336	0.701992	0.644129	0.697379	0.678117	0.725717	0.651772	0.68565	0.637507	0.665506	0.689694	0.745088
Phosphorus	EST	0.199548	0.358068	0.410885	0.359896	0.358927	0.380066	0.351681	0.438632	0.279779	0.467046	0.516318	0.606712	0.63665	0.582647	0.526905	0.472352	0.384581	0.513477	0.357701	0.619483	0.514784
Phosphorus	ESP	0.209652	0.186593	0.201146	0.212382	0.25817	0.251424	0.284304	0.274293	0.377501	0.329935	0.319745	0.298188	0.322503	0.26539	0.284854	0.284377	0.269955	0.318995	0.289715	0.27416	0.25442
Phosphorus	FIN	0.33176	0.440119	0.400541	0.443069	0.451634	0.444265	0.457569	0.457282	0.556805	0.489048	0.514302	0.55576	0.583316	0.536507	0.563763	0.56484	0.515778	0.529996	0.536911	0.533018	0.526633
Phosphorus	FRA	0.250818	0.231019	0.249394	0.261251	0.296462	0.311205	0.335181	0.316414	0.449902	0.588552	0.507457	0.53475	0.438138	0.398064	0.418373	0.418636	0.417485	0.431664	0.411838	0.441	0.413103
Phosphorus	GRC	0.262385	0.286476	0.307022	0.304519	0.324584	0.326189	0.353242	0.400023	0.410245	0.405906	0.379227	0.389819	0.399709	0.412853	0.431301	0.40903	0.3465	0.441568	0.411295	0.442037	0.393678
Phosphorus	HRV	1	1	1	1	1	1	0.0905903	0.100063	0.084858	0.157874	0.0795148	0.087544	0.220063	0.270871	0.175785	0.262235	0.34734	0.273846	0.214994	0.285815	0.297253
Phosphorus	HUN	0.265643	0.276506	0.263515	0.306938	0.268484	0.297194	0.293995	0.278373	0.336786	0.466087	0.396965	0.381259	0.337014	0.305747	0.256332	0.296093	0.253848	0.26602	0.233643	0.263479	0.264322
Phosphorus	IRL	0.480075	0.511204	0.364132	0.445391	0.529211	0.619529	0.642064	0.763281	0.78124	0.647392	0.54194	0.599662	0.585342	0.531431	0.72943	0.852224	0.877554	0.891928	0.852917	0.935995	0.897498
Phosphorus	ITA	0.346405	0.396427	0.455494	0.484292	0.501776	0.504804	0.548485	0.531545	0.544852	0.547605	0.573929	0.53689	0.618399	0.581511	0.573316	0.593708	0.589597	0.629527	0.608167	0.585952	0.532966
Phosphorus	LTU	0.0485449	0.0285498	0.0679749	0.0761805	0.111546	0.141946	0.139989	0.195209	0.261095	0.197899	0.245304	0.252311	0.207652	0.319693	0.217899	0.223236	0.123124	0.222874	0.21895	0.298078	0.238777
Phosphorus	LUX	0.881365	0.869836	0.893702	0.834938	0.857869	0.854817	0.905434	0.930381	0.907593	0.923303	0.93873	0.932808	0.956746	0.96035	0.96839	0.977132	0.968457	0.953452	0.96446	0.981275	0.987079
Phosphorus	LVA	0.0899603	0.0511041	0.0774325	0.119061	0.127979	0.203151	0.249862	0.291631	0.293612	0.310097	0.277086	0.336957	0.218397	0.214056	0.216718	0.204712	0.152152	0.343848	0.18138	0.297923	0.241909
Phosphorus	MLT	0.802992	0.473122	0.296844	0.416009	0.36957	0.54051	0.511981	0.439048	0.519124	0.93456	0.471188	0.325651	0.54832	0.551397	0.46642	0.830967	0.918307	0.96005	0.971769	0.990195	0.949783
Phosphorus	NLD	0.817122	0.806389	0.845201	0.848131	0.880039	0.876331	0.867694	0.904461	0.906654	0.962466	0.894467	0.956824	0.946438	0.977797	0.978216	0.979003	0.962723	0.976331	0.972909	0.973855	0.973225
Phosphorus	POL	0.101974	0.104604	0.121258	0.114863	0.115227	0.0843132	0.100077	0.103429	0.122796	0.121102	0.12905	0.144526	0.154467	0.174239	0.207781	0.187847	0.176095	0.223145	0.200047	0.204059	0.245302
Phosphorus	PRT	0.394503	0.422871	0.44001	0.459582	0.492922	0.442441	0.4452	0.423197	0.476497	0.550866	0.507725	0.571489	0.536614	0.505244	0.478153	0.456735	0.460997	0.579583	0.521559	0.569947	0.563133
Phosphorus	ROM	0.141928	0.0964935	0.101501	0.1017	0.131099	0.0944708	0.155138	0.192522	0.18158	0.169261	0.149309	0.155016	0.16618	0.193838	0.162994	0.183256	0.173486	0.198055	0.166719	0.181076	0.196325
Phosphorus	SWE	0.599414	0.581993	0.613051	0.593857	0.590671	0.586996	0.665981	0.631679	0.582462	0.865748	0.756487	0.720087	0.744999	0.738777	0.740409	0.701036	0.657279	0.683876	0.67019	0.705532	0.66727
Phosphorus	SVN	0.301473	0.339354	0.31	0.361875	0.392629	0.390506	0.402354	0.421215	0.435503	0.5116	0.452736	0.526778	0.566115	0.624691	0.547745	0.544622	0.479184	0.633214	0.591171	0.666298	0.645941
Phosphorus	SVK	0.273539	0.326597	0.310868	0.39569	0.470186	0.478772	0.473013	0.542105	0.580303	0.608756	0.5748	0.551977	0.564177	0.576293	0.543227	0.549686	0.466907	0.581814	0.455853	0.473126	0.487312
Phosphorus	GBR	0.60011	0.580888	0.595795	0.60805	0.644601	0.691306	0.700254	0.664842	0.638338	0.722441	0.674465	0.636064	0.702337	0.676566	0.665559	0.698991	0.672175	0.698599	0.675683	0.676491	0.675559
Phosphorus	USA	0.24112	0.239381	0.246525	0.226223	0.241865	0.249734	0.247321	0.252421	0.280088	0.213125	0.232751	0.228341	0.234866	0.224924	0.264807	0.267566	0.247247	0.266241	0.239223	0.263351	0.257638
Phosphorus	JPN	0.577931	0.607362	0.578	0.612277	0.604314	0.616077	0.618726	0.587319	0.646604	0.641907	0.617414	0.644265	0.680397	0.655478	0.648853	0.62144	0.58011	0.625618	0.603598	0.641442	0.621555
Phosphorus	CAN	0.384891	0.345246	0.308545	0.266422	0.28608	0.259757	0.312502	0.291197	0.249319	0.317181	0.309709	0.252055	0.308188	0.262647	0.23966	0.228737	0.203075	0.21063	0.187437	0.201529	0.19287
Phosphorus	KOR	0.662989	0.6269	0.668314	0.668358	0.642161	0.655542	0.785776	0.771366	0.764867	0.655919	0.69682	0.742629	0.748276	0.741424	0.725366	0.716756	0.705863	0.758485	0.727828	0.725888	0.811792
Phosphorus	AUS	0.174667	0.139624	0.100343	0.120534	0.116062	0.112434	0.138777	0.141971	0.142318	0.170861	0.162818	0.183651	0.185681	0.184301	0.173312	0.183612	0.129911	0.173796	0.11274	0.143945	0.130125
Phosphorus	CHE	0.822661	0.783674	0.780389	0.784637	0.795657	0.783372	0.801844	0.771108	0.777757	0.837329	0.852176	0.86374	0.893844	0.890105	0.871845	0.8749	0.874149	0.897559	0.86198	0.888803	0.898251
Phosphorus	TWN	1	1	1	1	1	1	1	1	1	1	1	1	1	1	1	1	1	1	1	1	1
Phosphorus	NOR	0.512897	0.545404	0.573669	0.544149	0.604241	0.577064	0.572773	0.611912	0.617502	0.652258	0.746878	0.70299	0.749901	0.765173	0.762091	0.72556	0.69919	0.74416	0.719722	0.73165	0.695762
Phosphorus	CHN	0.0251341	0.0312381	0.0265893	0.0350696	0.0417468	0.0328728	0.0401501	0.0566445	0.0451039	0.041485	0.0474053	0.0621872	0.0697991	0.0821945	0.0995415	0.114149	0.100019	0.130277	0.182831	0.208285	0.281078
Phosphorus	BRA	0.0325273	0.0254393	0.0248183	0.0160371	0.0149358	0.0177858	0.0182079	0.0159796	0.0204451	0.0296018	0.0377198	0.0339348	0.03989	0.0350037	0.0299554	0.0318269	0.0304107	0.0287126	0.031004	0.0310187	0.0220703
Phosphorus	IND	0.0151808	0.022544	0.0239673	0.0209241	0.024551	0.0231649	0.0279428	0.0317182	0.0186001	0.0190682	0.0228674	0.0255551	0.030404	0.0337111	0.0358587	0.0317291	0.0283594	0.0351962	0.0271614	0.0242192	0.0199874
Phosphorus	MEX	0.443226	0.42949	0.425201	0.404241	0.369121	0.337762	0.377576	0.412913	0.443965	0.357602	0.366451	0.403657	0.380922	0.365445	0.328469	0.306706	0.267916	0.339637	0.288174	0.283	0.369471
Phosphorus	RUS	0.235581	0.230687	0.231219	0.295178	0.400904	0.417957	0.454426	0.456129	0.417701	0.417153	0.499454	0.518068	0.549184	0.559682	0.518224	0.414129	0.349712	0.383263	0.376692	0.36978	0.370611
Phosphorus	TUR	0.0984336	0.0856421	0.0905899	0.0910532	0.101082	0.103137	0.1127	0.135215	0.175943	0.0973136	0.155436	0.19816	0.19675	0.15664	0.159727	0.168291	0.151254	0.189077	0.328475	0.209667	0.176586
Phosphorus	IDN	0.364043	0.486884	0.466256	0.157469	0.23903	0.241818	0.188148	0.257775	0.253566	0.153082	0.218431	0.232708	0.0879069	0.108952	0.118156	0.0923174	0.0727948	0.0845877	0.0800901	0.160999	0.13668
Phosphorus	ZAF	0.11651	0.0965274	0.102431	0.132215	0.143543	0.211605	0.213551	0.253586	0.200222	0.195517	0.192564	0.210704	0.221208	0.147989	0.130629	0.148859	0.129906	0.134451	0.113352	0.114313	0.0999553
Phosphorus	WWA	0.260444	0.290505	0.296644	0.269959	0.299282	0.287747	0.302426	0.285394	0.312936	0.336548	0.392352	0.470097	0.383623	0.370892	0.393086	0.406277	0.304742	0.348513	0.366636	0.350718	0.421996
Phosphorus	WWL	0.201983	0.160037	0.186434	0.141888	0.149772	0.126559	0.128821	0.13581	0.183982	0.205419	0.184625	0.187335	0.221126	0.255526	0.252486	0.281116	0.180559	0.194871	0.223546	0.234026	0.209723
Phosphorus	WWE	0.196187	0.209997	0.275605	0.270901	0.270899	0.219671	0.156196	0.184293	0.176975	0.152726	0.195906	0.159044	0.181179	0.190409	0.182941	0.162624	0.15871	0.180778	0.195675	0.210176	0.180568
Phosphorus	WWF	0.175138	0.18934	0.212292	0.22873	0.300192	0.245092	0.246456	0.323299	0.285433	0.263478	0.237498	0.250694	0.208887	0.246815	0.242283	0.222389	0.197633	0.200006	0.237275	0.216356	0.207946
Phosphorus	WWM	0.396881	0.442186	0.427625	0.394778	0.49345	0.493204	0.475805	0.59595	0.501308	0.615297	0.642024	0.756071	0.731101	0.659254	0.697868	0.761863	0.733595	0.715706	0.804422	0.703448	0.780608
Phosphorus	Advanced	0.234881	0.211046	0.219827	0.222561	0.25136	0.246548	0.268542	0.246316	0.27938	0.263827	0.266234	0.260524	0.275711	0.261361	0.270086	0.266761	0.234851	0.265622	0.21915	0.242223	0.244539
Phosphorus	EmergingDeveloping	0.0361416	0.0342282	0.0294461	0.0280707	0.0250653	0.0219295	0.0218485	0.0240898	0.0207165	0.020381	0.0220123	0.0251632	0.0292716	0.031493	0.0304677	0.0306583	0.0309958	0.032566	0.0345962	0.0370369	0.0333722
Phosphorus	Global	0	0	-2.22045e-16	0	0	0	0	0	0	0	0	0	0	0	0	0	0	0	0	0	0
Biodiversity	AUT	0.632627	0.65531	0.675894	0.682465	0.705278	0.716623	0.728941	0.73464	0.745281	0.710285	0.685265	0.704015	0.704593	0.666715	0.72135	0.710504	0.711718	0.709793	0.746719	0.788	0.711283
Biodiversity	BEL	0.876901	0.885251	0.884558	0.891988	0.887469	0.913549	0.905523	0.915221	0.92445	0.912973	0.893921	0.907059	0.908099	0.904121	0.890595	0.916078	0.90898	0.912269	0.927604	0.923741	0.929568
Biodiversity	BGR	0.0841455	0.103185	0.205106	0.217797	0.264592	0.246558	0.285295	0.352927	0.46541	0.371543	0.404099	0.432805	0.400315	0.450674	0.46985	0.472525	0.491863	0.500969	0.563935	0.574575	0.546464
Biodiversity	CYP	0.0198306	0.0126998	0.011163	0.0140919	0.0155831	0.0135543	0.0214508	0.0248021	0.068612	0.0292647	0.0270299	0.0263146	0.0319222	0.0282111	0.0436017	0.0760276	0.104181	0.156839	0.21359	0.261734	0.338648
Biodiversity	CZE	0.37154	0.374587	0.408372	0.407861	0.48276	0.526075	0.52012	0.537645	0.563662	0.556589	0.516797	0.578953	0.548846	0.545056	0.522689	0.532812	0.528775	0.571179	0.554116	0.535532	0.523842
Biodiversity	DEU	0.776523	0.76332	0.770543	0.76785	0.773786	0.768395	0.772997	0.765027	0.756284	0.752374	0.736567	0.765131	0.770172	0.765778	0.748947	0.775931	0.770321	0.7835	0.796334	0.8005	0.814662
Biodiversity	DNK	0.558144	0.576406	0.650625	0.678293	0.647616	0.699488	0.726124	0.7218	0.75833	0.744376	0.811921	0.815586	0.817656	0.810409	0.720489	0.854877	0.849922	0.74023	0.744308	0.814131	0.603277
Biodiversity	EST	0.119671	0.184149	0.259433	0.277288	0.330301	0.365823	0.508119	0.490279	0.503912	0.389772	0.353552	0.622879	0.643553	0.575691	0.632338	0.576803	0.605154	0.573204	0.613018	0.674635	0.592763
Biodiversity	ESP	0.322685	0.337767	0.372717	0.349911	0.392329	0.373032	0.391774	0.43475	0.459872	0.370468	0.398544	0.429239	0.411551	0.397938	0.415364	0.416663	0.424676	0.459374	0.440292	0.463241	0.388237
Biodiversity	FIN	0.504213	0.499031	0.526302	0.525732	0.560395	0.564903	0.565059	0.583745	0.617117	0.576076	0.547753	0.622629	0.554709	0.532858	0.583778	0.56082	0.547961	0.566316	0.571103	0.562628	0.529682
Biodiversity	FRA	0.588261	0.587978	0.59835	0.620749	0.638567	0.635933	0.639983	0.651243	0.681719	0.648727	0.636723	0.659943	0.683105	0.683073	0.682144	0.691034	0.685743	0.722514	0.720939	0.71024	0.713908
Biodiversity	GRC	0.151063	0.169633	0.192939	0.193065	0.206906	0.194535	0.192875	0.16965	0.24143	0.185101	0.162956	0.1899	0.18778	0.147357	0.151607	0.183172	0.169429	0.159061	0.18602	0.274571	0.149153
Biodiversity	HRV	0.265553	0.310025	0.352068	0.380441	0.408227	0.407297	0.41066	0.4218	0.467667	0.438847	0.401911	0.420536	0.420597	0.418037	0.435724	0.47176	0.493852	0.515312	0.542346	0.566506	0.527206
Biodiversity	HUN	0.385629	0.427974	0.473678	0.530912	0.524099	0.534753	0.591019	0.609516	0.641845	0.634151	0.592892	0.545987	0.544094	0.519765	0.54055	0.562801	0.579009	0.640189	0.594583	0.594626	0.584111
Biodiversity	IRL	0.708417	0.720916	0.632975	0.680511	0.749373	0.789845	0.807074	0.834408	0.842642	0.791374	0.66192	0.742121	0.770674	0.667942	0.732365	0.856152	0.884957	0.893412	0.87178	0.933459	0.906232
Biodiversity	ITA	0.522808	0.540462	0.547411	0.538829	0.56559	0.556621	0.587367	0.570072	0.565671	0.558268	0.553629	0.569217	0.528327	0.506033	0.526819	0.536614	0.555174	0.559341	0.577357	0.563839	0.544541
Biodiversity	LTU	0.126111	0.129168	0.359581	0.361993	0.483908	0.61779	0.67225	0.682204	0.777218	0.679287	0.715831	0.776554	0.853045	0.801359	0.816589	0.771911	0.749327	0.770517	0.81875	0.830789	0.794564
Biodiversity	LUX	0.874527	0.863494	0.858433	0.85242	0.893072	0.90652	0.937111	0.944712	0.927706	0.924777	0.911137	0.913452	0.931559	0.926408	0.930316	0.952019	0.944881	0.928298	0.953737	0.965156	0.952613
Biodiversity	LVA	0.069253	0.0879964	0.0868009	0.146456	0.227475	0.381871	0.542165	0.616661	0.631916	0.487789	0.40682	0.509043	0.770403	0.598914	0.649107	0.655284	0.712324	0.781438	0.735308	0.755658	0.776986
Biodiversity	MLT	0.0800363	0.032642	0.0194615	0.0453028	0.0545159	0.0738983	0.0580833	0.0499322	0.0441244	0.0494559	0.0343662	0.0314794	0.0320533	0.0408846	0.0277437	0.20663	0.393775	0.465463	0.566787	0.623135	0.712445
Biodiversity	NLD	0.882284	0.882382	0.886443	0.899441	0.906576	0.904129	0.901296	0.902322	0.900393	0.909046	0.861101	0.892094	0.90274	0.907064	0.907489	0.917215	0.897849	0.921338	0.924513	0.909507	0.923342
Biodiversity	POL	0.298292	0.291882	0.326503	0.316708	0.345536	0.333202	0.339404	0.370206	0.42033	0.364442	0.382632	0.403389	0.406909	0.387785	0.441671	0.470753	0.430488	0.448577	0.483484	0.498515	0.468135
Biodiversity	PRT	0.482998	0.497241	0.520395	0.511481	0.551531	0.507634	0.539702	0.59579	0.60062	0.530154	0.56382	0.578148	0.523742	0.509006	0.527698	0.518171	0.527154	0.570952	0.592601	0.575112	0.531387
Biodiversity	ROM	0.199003	0.209663	0.226977	0.295911	0.377771	0.354687	0.391339	0.456169	0.487999	0.460874	0.520632	0.534461	0.500602	0.502934	0.548805	0.581109	0.586187	0.598971	0.659224	0.650076	0.640586
Biodiversity	SWE	0.721659	0.716133	0.721422	0.744723	0.751419	0.744734	0.770747	0.755471	0.774676	0.752962	0.774981	0.790062	0.791196	0.807282	0.797291	0.739843	0.731483	0.744999	0.765351	0.79423	0.752994
Biodiversity	SVN	0.314274	0.317518	0.320652	0.346981	0.388786	0.387102	0.428369	0.462113	0.507576	0.46028	0.434845	0.501496	0.571566	0.524041	0.452503	0.478786	0.498424	0.555645	0.567742	0.606371	0.565397
Biodiversity	SVK	0.4699	0.517611	0.536173	0.583791	0.673806	0.705544	0.742211	0.776008	0.780485	0.766751	0.747927	0.771116	0.801145	0.777071	0.76122	0.772915	0.724743	0.786934	0.746589	0.768158	0.664662
Biodiversity	GBR	0.768995	0.764378	0.780679	0.780162	0.804551	0.824841	0.827105	0.797063	0.81439	0.791441	0.799746	0.812149	0.799985	0.792774	0.782889	0.805643	0.805614	0.808132	0.803247	0.827054	0.824072
Biodiversity	USA	0.246585	0.267679	0.264231	0.280697	0.291745	0.301744	0.299213	0.297123	0.292556	0.303625	0.29882	0.341437	0.297856	0.304589	0.311908	0.346567	0.34773	0.366041	0.364024	0.376413	0.395957
Biodiversity	JPN	0.764175	0.759754	0.738831	0.746162	0.75699	0.762017	0.771293	0.770287	0.783958	0.747542	0.766871	0.787471	0.781595	0.762466	0.75784	0.737028	0.710154	0.74594	0.748569	0.763458	0.745642
Biodiversity	CAN	0.773053	0.771686	0.748539	0.742936	0.751155	0.767486	0.770222	0.766998	0.754526	0.765545	0.748972	0.768932	0.772041	0.762259	0.764502	0.774038	0.747666	0.756664	0.807455	1.27295	0.764626
Biodiversity	KOR	0.821616	0.816614	0.843614	0.831336	0.843765	0.856134	0.863512	0.883216	0.881232	0.855036	0.869972	0.894845	0.895918	0.884341	0.872745	0.853087	0.859459	0.872028	0.865243	0.864597	0.855466
Biodiversity	AUS	0.0578095	0.0480101	0.0480826	0.0615988	0.0810152	0.0827702	0.089572	0.119455	0.1417	0.105913	0.1374	0.178632	0.138289	0.124143	0.125734	0.146319	0.11864	0.152174	0.119764	0.141742	0.122333
Biodiversity	CHE	0.72229	0.716789	0.766119	0.737694	0.767508	0.756567	0.782188	0.792386	0.829884	0.837787	0.853264	0.887846	0.825373	0.822481	0.75987	0.75459	0.719536	0.709661	0.631098	0.622645	0.702562
Biodiversity	TWN	0.725269	0.624895	0.609277	0.576417	0.611232	0.666772	0.656093	0.666331	0.672363	0.580471	0.708439	0.628639	0.621066	0.65998	0.700771	0.664801	0.654982	0.650824	0.660777	0.676038	0.630469
Biodiversity	NOR	0.54829	0.568449	0.561788	0.561213	0.5783	0.609158	0.591482	0.60132	0.670991	0.607031	0.667612	0.725742	0.734043	0.713429	0.763177	0.637846	0.738792	0.702698	0.71993	0.71534	0.752359
Biodiversity	CHN	0.0945417	0.112451	0.11903	0.151822	0.17103	0.168183	0.186993	0.194824	0.215437	0.222256	0.260394	0.295669	0.323751	0.325805	0.320106	0.309615	0.304802	0.33008	0.345852	0.38796	0.381968
Biodiversity	BRA	0.0425667	0.0362864	0.0400571	0.0361465	0.0292594	0.025339	0.0322208	0.0336776	0.0398781	0.037694	0.0524681	0.0601153	0.0592178	0.0595712	0.0587783	0.0603052	0.0480534	0.0477893	0.0629438	0.0611182	0.0655161
Biodiversity	IND	0.0221264	0.0281772	0.0311938	0.0304889	0.0395024	0.0438359	0.0522237	0.0550899	0.0519882	0.0580965	0.0616698	0.0758199	0.0697523	0.0606951	0.0654277	0.0620285	0.0651885	0.073953	0.0632225	0.0620905	0.0545986
Biodiversity	MEX	0.0734329	0.0763076	0.0763541	0.0680034	0.0719046	0.0690029	0.0758142	0.076576	0.0730728	0.0641202	0.0643898	0.0702039	0.0728111	0.064316	0.0662574	0.0679956	0.0723576	0.069727	0.0699055	0.0663864	0.070178
Biodiversity	RUS	0.451483	0.399419	0.347192	0.39845	0.516132	0.494242	0.536833	0.52588	0.573256	0.535636	0.623992	0.628431	0.647986	0.676356	0.647388	0.589324	0.547332	0.55888	0.584401	0.568736	0.544285
Biodiversity	TUR	0.217824	0.159355	0.200416	0.189824	0.212333	0.205679	0.238024	0.25629	0.261151	0.228872	0.334413	0.320726	0.320078	0.310292	0.3249	0.281616	0.288873	0.316888	0.367889	0.329792	0.349707
Biodiversity	IDN	0.0586961	0.0635603	0.069741	0.0534494	0.0677209	0.0612622	0.0708693	0.0998541	0.110031	0.0978497	0.106433	0.145413	0.106047	0.100866	0.141196	0.117693	0.101722	0.130689	0.147653	0.119294	0.0889277
Biodiversity	ZAF	0.0545335	0.0502731	0.0577147	0.0601175	0.0835427	0.0887139	0.122964	0.1032	0.112285	0.0949916	0.0980693	0.124307	0.0921769	0.0859478	0.0774382	0.0963365	0.115044	0.0875402	0.115081	0.0840588	0.0540737
Biodiversity	WWA	0.280462	0.283667	0.300174	0.288127	0.315615	0.318692	0.380001	0.309159	0.355173	0.309307	0.370099	0.426488	0.410323	0.434534	0.441452	0.427844	0.405405	0.437037	0.46649	0.446909	0.439659
Biodiversity	WWL	0.269219	0.260947	0.277991	0.263279	0.294881	0.287726	0.29414	0.317189	0.342749	0.328226	0.362869	0.383626	0.412347	0.424091	0.385319	0.440457	0.399224	0.408119	0.479275	0.453026	0.417559
Biodiversity	WWE	0.106242	0.0906209	0.117257	0.200937	0.175703	0.159389	0.162593	0.172439	0.223884	0.188119	0.211147	0.238154	0.258168	0.210859	0.19861	0.194377	0.194043	0.230125	0.256287	0.226063	0.216101
Biodiversity	WWF	0.0817213	0.0875365	0.130135	0.125685	0.12799	0.120932	0.116084	0.144606	0.168722	0.158704	0.160249	0.190925	0.170724	0.165566	0.163372	0.156696	0.160112	0.152612	0.138803	0.135968	0.127884
Biodiversity	WWM	0.333772	0.369034	0.382118	0.364933	0.415775	0.43004	0.469852	0.469014	0.525418	0.522914	0.531256	0.55699	0.57781	0.567388	0.550445	0.556285	0.52923	0.553159	0.569224	0.56761	0.534751
Biodiversity	Advanced	0.237026	0.244156	0.249681	0.268257	0.29016	0.294266	0.298693	0.295843	0.307119	0.294121	0.295869	0.331722	0.299335	0.305249	0.307529	0.329413	0.316585	0.336726	0.333745	0.34353	0.35837
Biodiversity	EmergingDeveloping	0.0545962	0.0531503	0.0560142	0.0505741	0.0539941	0.0537109	0.0595067	0.060766	0.067052	0.0663009	0.0735986	0.0816542	0.0879568	0.084595	0.0822732	0.0809242	0.0826994	0.0832792	0.0879451	0.0833671	0.078602
Biodiversity	Global	0	0	0	0	0	0	-2.22045e-16	0	0	0	0	0	-2.22045e-16	0	-2.22045e-16	0	0	0	0	0	0

## Sheet: Exceedance_LowerBound
indicator	region	2000	2001	2002	2003	2004	2005	2006	2007	2008	2009	2010	2011	2012	2013	2014	2015	2016	2017	2018	2019	2020
Acid	AUT	2.08598	2.24428	2.33263	2.45869	2.55984	2.59294	2.61839	2.65107	2.67218	2.53313	2.51208	2.48392	2.38295	2.42286	2.36199	2.3868	2.38424	2.54351	2.54883	2.48484	2.20381
Acid	BEL	2.53501	2.51558	2.43311	2.66131	2.61639	2.77996	2.99236	3.00821	3.3295	3.05716	2.72841	2.63602	2.50677	2.55982	2.57269	2.6366	2.50937	2.59547	2.75954	2.60386	2.37402
Acid	BGR	0.938378	1.02074	0.981064	1.10548	1.03812	1.10899	1.17202	1.3178	1.11269	1.06077	0.936829	1.02129	1.03348	0.947418	0.974527	0.975977	0.965404	0.981909	0.923851	0.954297	0.923876
Acid	CYP	1.80569	1.76547	1.9768	2.13423	2.16258	2.35667	2.64947	2.87385	3.49895	3.20019	3.07347	2.92783	2.59633	2.25195	2.2069	2.0335	2.11992	2.2173	2.17074	2.22457	1.86488
Acid	CZE	2.0664	2.11226	2.0877	2.30258	2.11942	2.09267	2.38216	2.36412	2.4309	2.14737	2.3241	2.38007	2.15806	2.1262	2.02067	2.05549	1.87852	2.16969	1.99058	2.24402	1.88087
Acid	DEU	2.39004	2.3653	2.29462	2.45618	2.45856	2.48966	2.56697	2.51219	2.63129	2.42013	2.44557	2.51476	2.43559	2.46399	2.45266	2.40857	2.48214	2.59895	2.57729	2.52949	2.22314
Acid	DNK	2.65036	2.63974	2.51145	2.72106	2.86068	2.68376	3.02247	3.19109	3.03979	2.71466	2.61328	2.62132	2.37278	2.55242	2.48951	2.56732	2.90452	2.64185	2.00677	2.89342	2.41029
Acid	EST	1.86511	1.97324	1.89892	2.23429	2.23644	2.12143	2.50297	2.80823	2.34245	1.94705	2.2192	2.17895	1.95088	2.25946	2.18139	1.98176	1.95136	2.12766	1.97908	1.52842	1.48909
Acid	ESP	1.58057	1.63768	1.77671	1.83786	2.01368	2.1334	2.15623	2.30806	2.05388	1.70865	1.58228	1.58917	1.42628	1.32521	1.37898	1.42992	1.38812	1.50042	1.45627	1.45086	1.19787
Acid	FIN	2.35846	2.57538	2.42069	3.17469	2.91236	2.96342	3.35253	3.34254	3.06902	2.83123	3.16834	3.12756	2.71059	2.72557	2.50441	2.25093	2.40584	2.42043	2.53023	2.34591	1.88355
Acid	FRA	1.58503	1.58452	1.5909	1.69831	1.7804	1.80694	1.80287	1.8043	1.80926	1.67504	1.68167	1.66319	1.65464	1.64648	1.56593	1.55322	1.60045	1.71086	1.68704	1.65536	1.39923
Acid	GRC	2.01664	2.01623	2.0946	2.28358	2.31354	2.49969	2.66757	3.1461	2.81153	2.73021	2.77869	2.42607	2.08953	1.99355	2.08006	1.61593	1.54188	1.7858	1.9624	1.39903	1.79774
Acid	HRV	0.81712	0.936452	1.03086	1.19588	1.20403	1.29287	1.31091	1.36116	1.41118	1.25591	1.15612	1.12863	0.991035	1.046	0.993818	0.98511	1.08743	1.14843	1.16741	1.16886	1.11598
Acid	HUN	0.96344	1.05018	1.10935	1.31557	1.35148	1.33367	1.37933	1.3819	1.43103	1.217	1.20746	1.18423	1.12127	1.14956	1.12823	1.16955	1.18545	1.22418	1.32806	1.41876	1.18082
Acid	IRL	2.68594	2.96233	2.9334	3.45129	3.48998	3.93791	4.26376	4.47001	4.29194	3.77703	2.87406	2.73861	2.48784	2.29626	2.63092	2.5496	2.96112	3.8638	3.51204	6.294	3.87574
Acid	ITA	1.78902	1.78877	1.8741	1.99143	2.11197	2.1383	2.20935	2.2109	2.15431	1.98411	2.09793	2.04983	1.83456	1.73321	1.68833	1.70915	1.6831	1.69596	1.74904	1.67341	1.45136
Acid	LTU	0.605527	0.644696	0.667252	0.686258	0.779631	0.962774	1.04932	1.22454	1.26381	0.947904	1.10443	1.21374	1.22795	1.07026	1.14029	1.04334	1.02265	1.07369	1.20207	1.24653	0.951326
Acid	LUX	4.47105	5.80131	5.8855	6.38858	7.4445	7.56673	7.3555	7.43884	7.62534	7.03498	6.3896	6.12899	6.28691	6.32011	7.36213	6.56215	7.14746	6.65225	6.25136	7.26722	6.8077
Acid	LVA	0.663221	0.71767	0.752002	0.814778	0.863368	0.849191	1.14191	1.3127	1.23675	0.840602	0.877002	1.00785	0.894131	0.934737	1.12184	1.0228	1.01124	0.998935	1.09879	1.04987	0.916838
Acid	MLT	1.48079	1.61721	1.46013	1.67092	1.71416	1.7918	1.70665	1.7047	1.73894	1.60471	1.6108	1.59681	1.70677	1.45568	1.38243	1.26727	1.41514	1.41452	1.53848	1.57548	1.59938
Acid	NLD	2.55736	2.56315	2.57522	2.71205	2.86247	2.79572	2.84281	2.9221	2.93938	2.72403	2.59243	2.63977	2.55482	2.57969	2.45329	2.69263	2.42111	2.69599	2.65714	2.86797	2.46707
Acid	POL	1.35833	1.37195	1.36941	1.40602	1.41509	1.49339	1.51395	1.63941	1.70152	1.5914	1.69431	1.64726	1.61654	1.58197	1.57501	1.5499	1.58403	1.67856	1.72833	1.64079	1.57152
Acid	PRT	1.38044	1.40286	1.48552	1.43026	1.56881	1.63103	1.49865	1.50396	1.5055	1.40352	1.35989	1.2667	1.09658	1.03329	1.09993	1.06871	1.13304	1.1521	1.18149	1.10944	1.00805
Acid	ROM	0.700914	0.768329	0.766941	0.848991	0.824378	0.870614	0.970717	1.05449	1.0688	0.864141	0.81738	0.94155	0.873632	0.755112	0.731943	0.754	0.778284	0.827441	0.892139	0.873709	0.838112
Acid	SWE	1.82891	1.73278	1.76732	2.00723	1.97419	1.94559	2.003	2.00574	1.97453	1.7377	1.86191	1.84804	1.6504	1.70455	1.70271	1.72246	1.71283	1.691	1.72212	1.71366	1.46615
Acid	SVN	1.50609	1.38553	1.41736	1.6303	1.60417	1.62767	1.67425	1.86408	2.17898	1.71225	1.76862	1.80715	1.62779	1.5171	1.42536	1.47514	1.46963	1.51961	1.43235	1.49785	1.51322
Acid	SVK	1.32707	1.31835	1.31897	1.34344	1.34901	1.42833	1.47141	1.68169	1.8606	1.55627	1.56343	1.53002	1.35482	1.38671	1.32936	1.35641	1.41176	1.47453	1.54046	1.54304	1.35987
Acid	GBR	2.28486	2.31784	2.35542	2.40014	2.54975	2.57666	2.73011	2.70732	2.54237	2.19472	2.30596	2.24673	2.2374	2.22203	2.20474	2.21234	2.0716	2.05051	2.04525	2.08722	1.6305
Acid	USA	4.32068	4.35211	4.34263	4.42104	4.52856	4.63485	4.61714	4.66097	4.33102	4.03003	4.2279	4.09854	3.9361	4.0433	4.15246	4.14481	4.00065	4.01385	4.17526	4.66243	3.58139
Acid	JPN	2.20993	2.1932	2.20474	2.27208	2.31334	2.40191	2.42937	2.42116	2.4175	2.24181	2.35976	2.60422	2.67561	2.58855	2.51824	2.37917	2.31386	2.32509	2.2719	2.29937	2.08301
Acid	CHN	0.427924	0.456058	0.485182	0.555275	0.645111	0.702407	0.741024	0.820031	0.860124	1.03075	1.10323	1.22603	1.25738	1.34627	1.37306	1.39128	1.39016	1.41597	1.50282	1.53824	1.5332
Acid	CAN	2.80967	2.82096	2.83208	3.18371	3.25019	3.20131	3.24578	3.3707	3.39148	2.94617	3.45124	3.54719	3.44329	3.46352	2.88594	2.57749	2.97101	3.16754	1.74821	-5.90387	3.22
Acid	KOR	1.79437	1.82734	1.962	2.08366	2.14905	2.29514	2.55133	2.64995	2.55297	2.25881	2.50704	2.73336	2.69442	2.6309	2.55612	2.61551	2.60899	2.88451	2.81991	2.81524	2.59045
Acid	BRA	0.374964	0.383097	0.377858	0.375856	0.365581	0.377741	0.385706	0.415007	0.475655	0.444173	0.545067	0.590361	0.620201	0.666123	0.679098	0.591895	0.537932	0.563421	0.54396	0.564333	0.491201
Acid	IND	0.164957	0.166252	0.172089	0.174152	0.182974	0.195796	0.202602	0.229971	0.235514	0.264998	0.290337	0.31319	0.329777	0.317887	0.354201	0.366963	0.366744	0.399227	0.413959	0.411645	0.377497
Acid	MEX	0.811709	0.806218	0.815166	0.805988	0.827082	0.861864	0.909384	0.926043	0.945488	0.858256	0.895049	0.916126	0.924617	0.901149	0.90029	0.907767	0.906487	0.920209	0.894305	0.886154	0.672269
Acid	RUS	1.12377	1.25329	1.19888	1.29212	1.36905	1.3849	1.55817	1.66172	1.74769	1.56188	1.59525	1.77871	1.83223	1.86989	1.76582	1.67803	1.69648	1.80514	1.797	1.83847	1.7996
Acid	AUS	3.43227	3.41783	3.72462	3.651	3.93636	4.03988	4.15202	4.38108	4.11682	4.28051	4.18295	4.45419	4.37055	4.24382	4.19052	4.25909	4.08597	4.26832	4.00231	4.09666	3.78913
Acid	CHE	2.3671	2.31483	2.3862	2.47761	2.59188	2.74319	2.63707	2.66872	2.82801	2.91344	3.13291	3.63161	3.27557	3.35982	3.0762	3.32761	3.42185	3.44378	3.31141	3.4513	3.49421
Acid	TUR	0.742554	0.601869	0.656723	0.689282	0.759024	0.840858	0.916258	1.01796	0.991693	0.885231	1.02898	1.15429	1.18754	1.23731	1.39931	1.35744	1.27497	1.38055	1.26491	1.13146	1.20247
Acid	TWN	2.30344	2.36982	2.32453	2.42797	2.76975	2.67881	2.72445	2.56234	2.6679	2.29467	2.67096	2.64851	2.66388	2.66625	2.64413	2.63241	2.69815	2.67327	2.81232	2.74567	2.52799
Acid	NOR	2.2612	2.24418	2.42658	2.49768	2.52116	2.52919	2.76215	2.96576	2.87432	2.86322	3.06829	3.03319	2.97199	3.08009	2.68321	3.13532	2.70992	2.94471	2.81458	2.97234	2.34752
Acid	IDN	0.199955	0.21417	0.238728	0.256391	0.25953	0.257158	0.285874	0.304224	0.336426	0.305625	0.349356	0.399658	0.408756	0.408483	0.438295	0.430144	0.419111	0.471958	0.505004	0.547422	0.498099
Acid	ZAF	1.08771	1.07732	1.15434	1.30761	1.45407	1.40303	1.38182	1.45682	1.54459	1.49979	1.52195	1.45592	1.59959	1.57257	1.61388	1.51767	1.45904	1.50746	1.37818	1.57066	1.52592
Acid	WWA	0.301878	0.298483	0.325904	0.329685	0.354832	0.381674	0.402224	0.392349	0.416634	0.429198	0.503392	0.482376	0.555376	0.574917	0.538677	0.516398	0.635802	0.575551	0.686506	0.662725	0.659647
Acid	WWL	0.411594	0.403133	0.362297	0.37016	0.379267	0.459968	0.498658	0.523575	0.56856	0.519577	0.615573	0.662362	0.698396	0.721271	0.705463	0.752406	0.670764	0.686864	0.623766	0.656782	0.55647
Acid	WWE	0.865365	0.953068	1.0029	1.06482	0.966133	0.994474	1.16304	1.33252	1.24129	1.08951	1.1312	1.15501	1.20059	1.11324	0.952344	0.891361	0.88573	0.829707	0.957271	0.889189	0.867599
Acid	WWF	0.0875547	0.0932076	0.0961001	0.100666	0.104161	0.107485	0.110808	0.133363	0.141935	0.142473	0.151474	0.157503	0.158429	0.176172	0.18015	0.187543	0.195727	0.207004	0.194433	0.203768	0.190676
Acid	WWM	0.885475	0.947531	0.987762	0.98959	1.04055	1.12898	1.18201	1.21273	1.40926	1.43823	1.51926	1.46481	1.57492	1.61654	1.63637	1.64594	1.64643	1.61352	1.6243	1.81156	1.68266
Acid	Advanced	2.8625	2.88374	2.90447	3.01638	3.10584	3.17935	3.23652	3.28153	3.16202	2.90691	3.03286	3.04415	2.94989	2.95742	2.93808	2.90771	2.85518	2.9176	2.89794	2.7933	2.59143
Acid	EmergingDeveloping	0.355924	0.368762	0.382012	0.405505	0.437467	0.467293	0.49436	0.530479	0.561109	0.593566	0.644026	0.681667	0.713481	0.738886	0.746877	0.746567	0.757965	0.768696	0.801902	0.820282	0.788533
Acid	Global	0.744039	0.755656	0.767596	0.802136	0.840373	0.874303	0.903507	0.938705	0.945059	0.933001	0.99224	1.02383	1.03477	1.05541	1.05921	1.05433	1.05634	1.07414	1.09955	1.10019	1.04406
Biodiversity	AUT	3.99713	4.24098	4.26711	4.37633	4.51505	4.40121	4.50146	4.6066	4.4218	4.30515	4.34748	4.46239	4.37241	4.57946	4.3535	4.50622	4.61453	4.98775	4.98045	4.74438	4.49379
Biodiversity	BEL	5.36631	5.46975	5.20776	5.55768	5.78532	5.6201	6.25878	6.10887	6.94799	6.40732	5.31044	4.79756	4.93067	5.05027	5.11529	4.55043	5.00999	5.26912	5.43315	5.11786	4.70615
Biodiversity	BGR	1.81558	1.93467	1.99513	2.05737	2.10945	2.04924	2.1531	2.33529	2.19022	2.1338	1.57219	1.57426	1.79401	1.47291	1.57135	1.62055	1.58584	1.69684	1.69858	1.7966	1.77453
Biodiversity	CYP	4.52994	4.49091	5.52495	5.69688	5.73473	6.73692	8.30461	9.32184	12.8411	11.5976	10.9863	10.6122	9.48175	8.53835	7.96286	7.31641	7.03741	7.03988	6.99897	6.20993	5.38093
Biodiversity	CZE	2.32687	2.44609	2.46444	2.60347	2.70013	2.64372	2.88082	2.95831	3.00158	2.62147	2.63512	2.97863	2.87624	2.69059	2.61283	2.62984	2.60272	3.02953	2.977	3.07269	2.82808
Biodiversity	DEU	3.55574	3.38119	3.35402	3.62448	3.8742	3.77836	3.94423	4.00734	4.09054	3.78245	3.58497	3.85219	3.67434	3.53418	3.60918	3.64849	3.56954	3.98672	4.01396	4.07249	3.65354
Biodiversity	DNK	5.71562	5.62205	5.09177	5.11012	6.0589	5.53248	6.40036	6.74207	6.70088	6.12393	5.69758	6.66175	6.21541	6.06639	6.82905	6.39607	6.90974	7.95188	4.61776	7.52908	7.3078
Biodiversity	EST	1.75152	2.02241	2.1991	2.41992	2.57931	2.38613	2.79524	3.03808	2.8635	2.41359	2.1156	2.29637	2.29932	2.64057	2.48553	2.62687	2.4282	2.85459	3.25337	2.5929	3.20016
Biodiversity	ESP	5.80408	6.10679	6.4672	6.43063	6.66578	6.99138	6.5478	6.7193	6.37831	5.67516	5.25851	5.30208	4.85932	4.41084	4.3151	4.35494	4.22034	4.42119	4.632	4.34504	4.56626
Biodiversity	FIN	4.16423	4.16494	3.88995	4.77215	4.91954	5.05427	5.44071	5.44529	5.28624	5.17759	4.79468	5.12459	5.10933	5.18857	4.88658	4.66479	4.7493	4.91776	4.99349	4.89069	4.228
Biodiversity	FRA	3.65485	3.74967	3.71852	3.86648	3.88339	3.88802	3.93786	3.90816	3.79212	3.49015	3.37248	3.50435	3.6073	3.50911	3.4816	3.4233	3.50128	3.64759	3.72679	3.6666	3.303
Biodiversity	GRC	10.5178	9.72588	8.87174	9.57379	10.2775	10.7699	11.2658	14.1861	11.7042	12.2079	12.5344	10.9547	9.81501	9.57658	9.40513	7.01266	6.91814	8.46645	9.39739	6.09977	9.67957
Biodiversity	HRV	1.73555	1.94275	2.12762	2.39942	2.50064	2.47198	2.52622	2.5859	2.78857	2.4779	2.23042	2.19278	2.05189	2.05051	1.94547	1.88288	2	2.1244	2.23922	2.28115	2.18648
Biodiversity	HUN	1.97703	1.95464	2.1234	2.16455	2.50546	2.41859	2.18567	2.27835	2.24696	1.96414	1.58813	1.85091	1.72013	1.73715	1.75484	1.70092	1.89557	1.91391	1.9173	1.91419	1.76059
Biodiversity	IRL	6.95003	7.63833	7.30287	7.65632	7.18841	7.6344	8.29045	8.76458	8.18986	7.96488	5.35844	5.05119	4.23575	5.00669	5.74466	5.53301	7.40909	9.24071	8.7394	12.3617	8.36486
Biodiversity	ITA	4.79926	4.75187	4.90783	5.08078	5.35508	5.22066	5.66812	5.61491	5.46208	5.22003	5.11177	5.11604	4.68325	4.46376	4.19718	4.4425	4.4423	4.65131	4.59532	4.2487	3.90316
Biodiversity	LTU	0.539647	0.564651	0.73239	0.743556	0.922878	1.15509	1.35586	1.50756	1.8389	1.25847	1.2063	1.42903	1.95665	1.37864	1.64166	1.52736	1.53982	1.60153	1.92569	2.11049	1.82183
Biodiversity	LUX	10.8714	11.5643	9.81886	10.8261	12.6224	12.9595	13.4151	13.2508	14.0617	12.9313	12.0772	12.4679	12.7672	13.7879	15.7898	13.2415	15.2291	13.4956	13.0224	18.395	16.1804
Biodiversity	LVA	1.07329	1.22374	1.25413	1.39727	1.54228	1.59072	2.24868	2.97633	2.45652	1.56835	1.31933	1.75645	3.17863	1.77413	2.17493	2.15704	2.39721	3.10355	2.85108	3.08663	3.53547
Biodiversity	MLT	3.99404	4.06607	3.73947	4.16064	4.25544	3.81286	3.61404	3.54801	3.6549	3.33707	3.27151	3.12825	3.33296	3.0764	3.06525	2.77944	3.11999	3.05576	3.95291	4.46476	3.88079
Biodiversity	NLD	6.70685	6.55337	6.55937	6.89973	7.54863	6.84235	6.77018	7.15668	6.64944	6.37711	4.43833	4.94181	4.9702	4.84306	5.03899	6.10278	5.23658	6.21248	6.06434	6.07006	5.55846
Biodiversity	POL	1.7608	1.78399	1.75471	1.79943	1.81516	1.96833	2.01537	2.23979	2.32701	2.1079	2.28876	2.31305	2.24664	2.17227	2.12931	2.17648	2.17534	2.35789	2.38988	2.34922	2.39656
Biodiversity	PRT	3.85496	3.93872	4.07519	4.1201	4.04421	3.84763	3.78289	4.13777	4.13639	3.76634	3.83526	3.52373	3.11508	3.08056	3.06397	3.23448	3.09506	3.27186	3.5214	3.45065	3.31412
Biodiversity	ROM	0.985599	1.05003	1.05622	1.18571	1.30328	1.24357	1.34824	1.54702	1.61145	1.4647	1.46541	1.583	1.27083	1.25883	1.33056	1.2641	1.30397	1.4629	1.53627	1.57246	1.54327
Biodiversity	SWE	3.57443	3.40912	3.39292	3.67584	3.77243	3.75854	3.88622	4.05046	3.9323	3.70411	4.07569	4.18303	4.24802	4.33837	4.30631	4.15007	4.09416	4.36577	4.13368	3.97091	3.87681
Biodiversity	SVN	5.78861	5.56781	5.58982	5.90251	6.14573	5.66746	5.53916	5.53198	5.68077	5.02427	4.80292	4.70306	4.35862	4.08305	3.98829	4.00118	3.55343	3.7774	3.86383	3.8413	4.07289
Biodiversity	SVK	1.3224	1.36472	1.45105	1.54389	1.69616	1.75189	1.85153	2.08985	2.32398	2.04372	1.82578	1.92366	1.84569	1.84049	1.98814	2.00412	1.82732	2.09496	2.07446	2.25507	2.03612
Biodiversity	GBR	4.77368	4.76106	4.96251	4.97237	5.39185	5.61246	5.51986	4.86777	4.72808	4.09572	4.01811	4.20564	4.18124	4.1401	4.20512	4.88585	3.94785	4.10324	4.21316	4.15348	3.5656
Biodiversity	USA	14.5517	13.93	14.2938	14.2648	13.8392	14.2087	14.0271	13.0115	12.5324	11.3996	12.411	12.8648	13.3024	13.0504	12.6211	12.357	12.5955	12.5828	12.3188	12.3106	12.2885
Biodiversity	JPN	5.30237	5.11007	4.74028	4.86197	5.0233	5.34749	5.48159	5.4373	5.66734	4.88692	5.02676	5.66276	5.82815	5.01892	4.67781	4.24849	3.89375	4.28986	4.15213	4.22212	3.85666
Biodiversity	CHN	1.2254	1.25568	1.28607	1.34132	1.48091	1.56547	1.6491	1.7102	1.79204	1.99907	2.07582	2.32298	2.53478	2.66551	2.78105	3.08902	2.97702	3.0209	3.30012	3.49754	3.66822
Biodiversity	CAN	5.17739	5.2809	5.17379	5.71856	5.69295	6.01012	6.27346	6.66092	6.34856	6.30688	6.51258	7.43285	7.41284	6.97474	6.18532	6.13213	5.79224	6.36688	5.76743	3.7682	6.14786
Biodiversity	KOR	3.73021	3.66091	4.33907	4.15355	4.38389	4.79284	5.33326	6.07339	5.5606	4.43916	5.29189	6.42854	6.45845	5.89123	5.3559	5.28926	5.32142	5.99935	6.06283	5.61717	5.35203
Biodiversity	BRA	9.31906	8.71984	9.11263	9.63108	9.29298	9.51398	9.26326	9.27759	9.3688	9.43216	9.39757	9.61626	9.06056	9.40784	8.89587	7.72985	9.16135	9.11502	7.55351	7.58005	6.2746
Biodiversity	IND	1.74549	1.78344	1.65839	1.74036	1.71429	1.79243	1.86573	1.92827	1.95424	1.9735	2.05694	2.02411	2.10745	2.08353	2.13635	2.34012	2.52167	2.68432	2.6169	2.77411	2.78144
Biodiversity	MEX	21.4779	22.0537	21.5095	20.4808	19.5255	20.8702	20.8557	19.9095	20.0754	20.5429	19.2588	19.2862	19.9639	18.8919	17.6974	17.3602	16.1692	17.2245	17.9355	17.9366	15.0363
Biodiversity	RUS	1.36847	1.44505	1.23519	1.37468	1.81975	1.70408	1.93658	1.97467	2.21663	2.01866	2.31989	2.51676	2.74764	2.94073	2.58848	2.15399	1.98502	2.17053	2.17977	2.33422	2.19658
Biodiversity	AUS	31.2681	37.9121	38.4023	35.7987	30.9381	32.1117	33.6987	28.6811	21.2677	25.4175	20.2662	21.2408	23.7953	23.6988	23.0635	22.596	20.4442	23.2043	19.9974	18.1579	19.6555
Biodiversity	CHE	5.59311	5.55107	6.17201	5.94106	6.86019	5.91333	5.58868	5.45755	6.27058	6.25457	6.1956	7.74241	6.70826	7.67607	7.20594	7.80504	8.21213	8.72701	8.29149	8.41017	9.24899
Biodiversity	TUR	3.58073	3.229	3.43462	3.60167	3.40491	3.89543	3.99583	4.14116	4.02716	3.46122	4.22026	4.20811	4.39121	4.19875	4.46339	4.46206	4.51922	4.48258	4.18382	4.24065	4.20632
Biodiversity	TWN	3.94831	3.37726	3.13063	3.16004	3.44164	3.38354	3.38725	3.05057	3.11222	2.61321	3.38426	3.43921	3.18573	3.34105	3.03742	2.87872	2.82545	2.8106	2.94764	2.89296	2.63055
Biodiversity	NOR	5.08201	5.5145	5.71113	5.62565	5.79321	5.86743	6.42369	6.89865	6.90771	6.24832	6.38124	6.55165	6.41268	6.48388	5.20906	6.15713	5.37373	6.14246	5.85287	6.02663	4.83507
Biodiversity	IDN	2.8309	2.85002	3.04191	3.09487	3.18769	3.23667	3.29654	3.46149	3.59894	3.56339	3.86473	3.89561	3.85216	3.92388	4.01477	3.80928	3.97421	3.88789	4.21087	4.11301	3.95991
Biodiversity	ZAF	5.92597	5.60169	5.56561	6.25709	6.49764	6.17501	5.9533	6.49357	5.96123	5.9338	5.9524	5.6506	6.61128	6.13839	5.95675	5.66797	5.02644	6.36138	5.48286	6.13228	6.13223
Biodiversity	WWA	1.81473	1.66015	1.8418	1.72013	1.81468	1.83372	1.69085	1.71215	1.79032	2.07742	2.11316	1.95513	2.24867	2.30101	2.1758	2.17981	2.66285	2.35035	2.71651	2.38152	2.59951
Biodiversity	WWL	2.2487	2.48565	2.2969	2.19485	2.13618	2.31945	2.67838	2.91034	3.0058	2.92197	2.97885	2.99045	3.3139	3.43385	3.32834	3.26191	2.87614	2.88217	2.51964	2.39818	2.42957
Biodiversity	WWE	3.00255	3.39996	2.74621	3.39804	3.0143	2.87563	3.37467	3.68134	3.11553	2.89506	2.79002	2.70385	2.65846	3.19612	2.61929	2.66918	2.72185	2.53933	2.49318	2.81387	2.74936
Biodiversity	WWF	1.74436	1.75558	1.81414	1.81667	1.81385	1.81036	1.78414	1.85253	1.8329	1.84101	1.83863	1.97088	1.95572	2.00915	2.03753	2.07355	2.08969	2.04416	1.96855	2.04877	2.04519
Biodiversity	WWM	2.96242	3.11192	3.08371	2.76105	2.95592	2.96026	3.33318	3.51518	3.86806	4.07434	4.08417	4.36123	4.63588	4.60395	4.53376	4.55477	4.56367	4.60261	4.59567	4.87514	4.58292
Biodiversity	Advanced	8.25464	8.17702	8.30549	8.35283	8.29032	8.50503	8.60126	8.26499	7.91903	7.33195	7.52313	7.92427	8.06958	7.8085	7.53451	7.4178	7.31325	7.61412	7.42475	7.25814	7.19896
Biodiversity	EmergingDeveloping	2.44454	2.45157	2.45646	2.47075	2.49842	2.58094	2.63177	2.69224	2.75148	2.84851	2.89185	2.96117	3.10507	3.14633	3.10868	3.15734	3.24838	3.26825	3.30584	3.36299	3.30932
Biodiversity	Global	3.34417	3.33235	3.35054	3.36433	3.37296	3.46999	3.52245	3.51917	3.51432	3.50636	3.56694	3.67998	3.81828	3.8115	3.73954	3.76407	3.8267	3.88596	3.89074	3.91558	3.86061
Climate	AUT	4.28063	4.58702	4.8023	5.02116	5.10307	5.1531	5.20531	5.26419	5.23059	4.99458	4.918	4.92064	4.75891	4.85391	4.75437	4.77427	4.74962	5.07514	5.111	4.93151	4.44928
Climate	BEL	5.14615	5.1271	4.98464	5.41643	5.29306	5.53255	6.02932	6.01654	6.65396	6.14168	5.43257	5.23517	4.96946	5.07788	5.19739	5.14861	4.97042	5.21915	5.44356	5.13881	4.77005
Climate	BGR	1.95934	2.12127	2.12322	2.37191	2.22284	2.31336	2.40277	2.68572	2.37635	2.26873	1.99377	2.13895	2.1717	2.04479	2.08154	2.0738	2.08174	2.13908	1.99515	2.1099	2.00883
Climate	CYP	3.13782	3.06143	3.45475	3.71871	3.80171	4.10617	4.61992	5.00911	6.168	5.5972	5.50055	5.24068	4.67096	4.07814	4.01668	3.7609	3.99337	4.358	4.32664	5.02066	4.19964
Climate	CZE	3.9589	4.04899	4.00669	4.39464	4.05975	3.99921	4.53318	4.49617	4.61226	4.10752	4.43811	4.59791	4.20373	4.11064	3.95329	4.00593	3.6595	4.23297	3.907	4.37631	3.71751
Climate	DEU	4.76675	4.64901	4.54765	4.82789	4.81972	4.80481	4.91903	4.83886	5.06051	4.71746	4.68607	4.89246	4.7322	4.76925	4.77463	4.67329	4.78827	5.04862	4.98845	4.93587	4.35533
Climate	DNK	5.39672	5.34082	5.12108	5.39266	5.71898	5.38492	5.92702	6.24034	5.94616	5.32275	5.07429	5.28602	4.9009	5.10514	5.06096	5.25404	5.73068	5.37618	4.31539	5.91233	5.03644
Climate	EST	3.81004	3.99356	3.95971	4.568	4.57482	4.33143	5.02007	5.46777	4.71984	3.97235	4.33515	4.29027	3.986	4.62473	4.44675	4.12983	4.02807	4.47091	4.33992	3.65506	3.61596
Climate	ESP	3.45999	3.57859	3.83293	3.9443	4.23699	4.42386	4.51779	4.74724	4.291	3.62489	3.41755	3.39996	3.06946	2.85527	2.97485	3.02083	2.92845	3.14263	3.05309	3.03203	2.6207
Climate	FIN	4.8653	5.04297	4.76475	6.19064	5.72352	5.85826	6.58912	6.51613	6.28072	5.78939	6.17251	6.22803	5.5131	5.5485	5.15841	4.67156	4.89602	4.97088	5.17559	4.91331	3.99782
Climate	FRA	3.43382	3.43589	3.46694	3.64994	3.78797	3.83155	3.86404	3.82247	3.81261	3.54826	3.51711	3.49122	3.49505	3.45397	3.33108	3.28733	3.35921	3.56897	3.51101	3.44084	2.99338
Climate	GRC	4.09114	4.06877	4.24137	4.57921	4.6094	4.91974	5.19174	6.06998	5.54682	5.31825	5.38296	4.75809	4.2121	4.00808	4.14627	3.32423	3.18339	3.64991	3.98526	3.01086	3.666
Climate	HRV	1.70034	1.91229	2.13903	2.4656	2.49177	2.63558	2.66411	2.72149	2.8829	2.54466	2.35845	2.3441	2.09443	2.16476	2.08587	2.06476	2.20967	2.39098	2.4169	2.51774	2.38791
Climate	HUN	2.01959	2.13709	2.27759	2.64381	2.74114	2.68339	2.74528	2.76884	2.84822	2.41813	2.38216	2.3608	2.23423	2.29841	2.29833	2.34397	2.34425	2.45114	2.64186	2.8106	2.42975
Climate	IRL	6.12684	6.73155	7.14903	8.03405	7.71335	8.3958	8.94312	9.37061	8.88945	8.15505	6.18845	5.83625	5.14355	5.06794	5.98517	5.57239	6.43418	8.20078	7.51493	12.7107	7.96672
Climate	ITA	3.75812	3.73011	3.94315	4.12258	4.31075	4.33544	4.54386	4.45788	4.3577	4.00679	4.22617	4.11499	3.7315	3.52583	3.45612	3.47803	3.41724	3.47482	3.5534	3.38516	2.99255
Climate	LTU	1.61973	1.65443	1.77341	1.81217	2.00746	2.32026	2.45267	2.78823	2.85375	2.26186	2.42132	2.65287	2.74227	2.45144	2.64252	2.54082	2.51063	2.55359	2.73714	3.01342	2.41136
Climate	LUX	9.436	11.4718	11.3453	12.5659	14.1133	14.3985	14.0255	14.044	14.4774	13.3769	12.363	12.0595	12.3371	12.9178	14.8672	13.0273	13.8915	13.0897	12.3691	14.5026	13.9027
Climate	LVA	1.50701	1.60489	1.69171	1.83859	1.96221	2.01036	2.5719	2.91736	2.78551	1.98192	1.99367	2.30381	2.10193	2.18968	2.54575	2.39858	2.28776	2.47159	2.5395	2.67038	2.33693
Climate	MLT	2.68011	2.80905	2.54476	2.91498	3.00136	3.16525	3.01717	3.03333	3.10896	2.89157	2.88971	2.89011	3.03796	2.61433	2.4982	2.41752	2.91092	3.00337	3.40148	4.84869	3.68172
Climate	NLD	5.42419	5.38898	5.47874	5.75337	6.0063	5.76803	5.93826	6.02168	6.05789	5.57835	5.1989	5.28022	5.12685	5.2061	4.98487	5.69475	4.97682	5.59325	5.50344	5.91503	5.11369
Climate	POL	2.81411	2.85939	2.85709	2.89006	2.86922	3.02602	3.06383	3.30489	3.47738	3.19248	3.41353	3.33551	3.24056	3.1708	3.12364	3.07442	3.1499	3.35684	3.44475	3.28032	3.13484
Climate	PRT	3.01256	3.03109	3.16731	3.13894	3.30768	3.39269	3.15398	3.16962	3.19439	2.96099	2.90467	2.69174	2.35961	2.24731	2.3751	2.33584	2.38676	2.44576	2.53348	2.45985	2.3035
Climate	ROM	1.47358	1.593	1.63967	1.84391	1.81173	1.9673	2.06739	2.1934	2.21949	1.85882	1.78136	2.00823	1.85272	1.64205	1.64265	1.69188	1.73117	1.83969	1.96559	1.95476	1.88631
Climate	SWE	3.87992	3.67599	3.75129	4.23479	4.14181	4.06262	4.09666	4.15918	4.11406	3.62665	3.843	3.90416	3.5338	3.66544	3.63661	3.67497	3.60806	3.63808	3.63338	3.6704	3.21381
Climate	SVN	3.26733	3.04798	3.13873	3.62393	3.5423	3.50218	3.53445	3.82764	4.40377	3.53965	3.60959	3.71343	3.36687	3.20657	3.10224	3.14619	2.97915	3.17729	3.0083	3.3429	3.23871
Climate	SVK	2.64833	2.61711	2.64797	2.70771	2.68721	2.83021	2.89938	3.28603	3.65642	3.10555	3.086	3.06096	2.70384	2.85188	2.76176	2.80143	2.85818	3.01595	3.19798	3.21613	2.88145
Climate	GBR	4.7582	4.83026	4.92685	5.02578	5.26336	5.31208	5.63865	5.4542	5.13188	4.46645	4.59674	4.53265	4.54394	4.5138	4.52543	4.5574	4.20431	4.23502	4.18203	4.24845	3.41496
Climate	USA	8.43974	8.52303	8.4608	8.61747	8.86148	9.03093	8.98282	8.99769	8.40006	7.82446	8.17382	7.96424	7.63013	7.74383	7.94634	7.96747	7.67739	7.73717	7.94952	8.75213	6.98077
Climate	JPN	4.32791	4.26117	4.23001	4.39509	4.43636	4.59823	4.68557	4.62014	4.60737	4.18439	4.42898	4.94312	5.00898	4.77325	4.67208	4.39196	4.19151	4.32489	4.19343	4.24733	3.84017
Climate	CHN	0.922807	0.979495	1.02683	1.15986	1.34234	1.44731	1.52428	1.66102	1.74369	2.06467	2.18733	2.42801	2.49138	2.65438	2.7196	2.76923	2.74034	2.81101	3.00543	3.07207	3.08088
Climate	CAN	5.5066	5.48931	5.58298	6.30324	6.29833	6.28404	6.41764	6.60915	6.62531	5.81074	6.64305	6.89561	6.79524	6.7917	5.77592	5.26823	5.83117	6.21983	3.90604	-8.31328	6.24044
Climate	KOR	3.76615	3.76247	4.0512	4.34476	4.34415	4.62342	5.18485	5.3579	5.06147	4.41528	4.95718	5.5364	5.38342	5.15802	5.04465	5.09462	5.03654	5.66934	5.54191	5.4776	5.06022
Climate	BRA	1.48224	1.51688	1.56143	1.59939	1.56639	1.60499	1.5964	1.66371	1.76425	1.69211	1.90887	1.97462	1.98123	2.06441	2.09454	1.90057	1.88944	1.93499	1.78866	1.81544	1.61171
Climate	IND	0.483332	0.479809	0.48281	0.502836	0.513491	0.541329	0.56217	0.603786	0.62551	0.674187	0.725634	0.763545	0.780236	0.759644	0.817462	0.843798	0.843951	0.917114	0.93929	0.939184	0.876588
Climate	MEX	1.84172	1.84511	1.87624	1.8236	1.83476	1.92489	2.00966	2.0459	2.09143	1.90867	1.97501	2.01492	2.0238	1.98623	1.9872	2.00126	1.99459	2.04192	1.99748	1.98634	1.60689
Climate	RUS	2.24698	2.49219	2.36191	2.52803	2.80558	2.81458	3.11309	3.31403	3.46722	3.19595	3.19554	3.53739	3.65114	3.74022	3.54906	3.34048	3.38751	3.61193	3.56249	3.6555	3.63395
Climate	AUS	7.68381	8.13207	8.59532	7.8332	8.6857	8.61085	9.07053	9.49234	8.53381	8.90195	8.44214	9.61499	9.6045	8.68626	8.80226	9.03774	8.15242	8.97049	8.10086	8.17209	7.70254
Climate	CHE	4.79655	4.6808	4.86732	5.07689	5.21846	5.54707	5.29323	5.35854	5.69877	5.83116	6.20768	7.24842	6.5815	6.69668	6.11335	6.53693	6.63802	6.74676	6.372	6.76231	6.90102
Climate	TUR	1.51312	1.2558	1.39238	1.47003	1.56727	1.74019	1.89063	2.08173	2.03922	1.81316	2.18153	2.41976	2.4455	2.54906	2.83018	2.77695	2.65652	2.85484	2.6809	2.44552	2.58638
Climate	TWN	6.03991	5.31645	5.20755	5.0642	5.58365	5.23666	5.09965	4.78963	4.93739	4.20757	4.85544	4.76181	4.75981	4.80838	4.75493	4.70228	4.76686	4.73986	4.98861	4.91827	4.50869
Climate	NOR	4.85205	4.75447	5.18683	5.3555	5.27724	5.24305	5.71856	5.98865	5.85846	5.82219	6.14019	6.17508	6.04072	6.26067	5.49894	6.27948	5.48224	6.05379	5.69809	6.11703	4.96309
Climate	IDN	0.502039	0.521992	0.578096	0.613547	0.64248	0.625145	0.701406	0.74652	0.815527	0.750605	0.841664	0.974395	1.03505	1.03146	1.12658	1.10014	1.07291	1.20521	1.27396	1.40843	1.28517
Climate	ZAF	2.30391	2.25899	2.41796	2.66264	2.92938	2.76365	2.60209	2.87232	3.00018	2.9311	2.91147	2.79229	3.26401	3.19489	3.20825	3.04553	2.86144	3.09872	2.81711	3.14552	3.10303
Climate	WWA	0.809376	0.781718	0.845682	0.836918	0.905606	0.951239	0.946337	0.953542	0.989012	1.07352	1.20817	1.12827	1.30191	1.32626	1.25047	1.19345	1.50812	1.3262	1.60475	1.48605	1.54775
Climate	WWL	1.1366	1.1872	1.10571	1.1033	1.08757	1.26334	1.40158	1.49027	1.57676	1.44776	1.61717	1.69744	1.78727	1.84103	1.81535	1.85677	1.66074	1.70523	1.52139	1.59151	1.46418
Climate	WWE	1.81348	2.01528	2.06446	2.17922	2.00633	2.05557	2.38701	2.6484	2.54362	2.19988	2.27656	2.29135	2.40758	2.27955	1.95486	1.84236	1.83707	1.74712	1.96476	1.85166	1.83413
Climate	WWF	0.47997	0.487853	0.504866	0.528678	0.526402	0.542137	0.540339	0.606056	0.59701	0.599932	0.626874	0.655714	0.648256	0.691569	0.706838	0.71517	0.755058	0.754625	0.744487	0.785876	0.764305
Climate	WWM	2.08897	2.17919	2.22504	2.21643	2.30737	2.49665	2.62367	2.64572	3.03444	3.07662	3.23782	3.18697	3.38161	3.39493	3.46483	3.54009	3.59108	3.55017	3.5191	3.87562	3.6839
Climate	Advanced	5.7852	5.80293	5.83859	6.03643	6.19022	6.29874	6.41842	6.45385	6.22329	5.72159	5.92764	6.00266	5.81252	5.76716	5.7531	5.7013	5.54759	5.72599	5.65042	5.49677	5.11704
Climate	EmergingDeveloping	0.896485	0.920421	0.945857	0.992831	1.05873	1.11774	1.16708	1.2397	1.29809	1.36511	1.45913	1.53092	1.59576	1.64118	1.66017	1.65906	1.69548	1.71468	1.7858	1.81701	1.77689
Climate	Global	1.65345	1.67153	1.69376	1.75903	1.83355	1.89527	1.95061	2.01342	2.02515	2.00434	2.1105	2.17856	2.20155	2.22985	2.24358	2.23471	2.24354	2.28484	2.33459	2.33905	2.2503
Land	AUT	2.0336	2.12176	2.20131	2.23053	2.16654	2.07568	2.11472	2.12826	2.07154	2.18207	2.19752	2.21256	2.12572	2.18351	2.13886	2.25745	2.25362	2.29792	2.30444	2.11574	2.15249
Land	BEL	2.65392	2.32545	2.293	2.48584	2.47145	2.42729	2.55422	2.39563	2.95452	2.8636	2.45295	1.95066	2.08853	2.46346	2.14373	1.8324	2.3364	2.63023	2.48426	2.20632	2.00494
Land	BGR	1.73187	1.82977	1.92198	1.98261	1.98936	1.88137	1.86867	1.81027	1.72042	1.76878	1.16923	1.11192	1.40476	0.942805	1.07913	1.14228	1.07663	1.21133	1.12732	1.16548	1.25689
Land	CYP	0.205993	0.186132	0.196925	0.214009	0.222182	0.228288	0.229984	0.224164	0.394183	0.232548	0.202394	0.198738	0.219433	0.167825	0.198843	0.308712	0.284157	0.37092	0.506513	0.50635	0.559992
Land	CZE	1.70475	1.64263	1.80857	1.90538	1.88491	1.72941	1.91286	1.8572	1.94414	1.68782	1.80738	1.88942	1.92386	1.69999	1.69649	1.72278	1.7042	1.96789	1.99278	1.86973	1.93855
Land	DEU	1.87555	1.53461	1.57764	1.78661	1.85077	1.75374	1.71922	1.79108	1.84125	1.73255	1.759	1.89288	1.84963	1.77257	1.78411	1.76393	1.79327	1.97716	2.06753	2.05012	1.91601
Land	DNK	2.34238	2.23187	2.02904	1.78532	2.40041	2.12891	2.26299	2.32013	2.47726	2.424	1.91504	2.36471	2.40056	1.93665	1.77042	1.85253	1.84114	1.83584	2.01257	2.08637	2.06415
Land	EST	3.06915	2.85669	2.53522	2.71912	2.48051	2.21596	2.61983	2.49484	2.33046	2.2888	1.73066	1.23454	1.24868	1.69693	1.23824	1.84016	1.68451	2.12323	2.5201	1.40191	2.50186
Land	ESP	2.34538	2.43441	2.67082	2.46562	2.55832	2.70715	2.57664	2.47926	2.63972	2.39501	2.28545	2.32353	2.13545	1.91895	1.89555	1.80093	1.69278	1.75478	1.85502	1.59297	1.74324
Land	FIN	1.83047	1.70359	1.4085	2.10135	2.11733	2.26726	2.22476	2.18936	2.19009	2.25961	1.90374	2.02592	2.19939	2.13907	1.90116	1.99976	1.98929	2.15341	2.18109	2.10022	1.92379
Land	FRA	1.99031	1.97867	2.0313	2.05837	1.9849	1.99193	2.00545	1.99259	1.86347	1.85925	1.80724	1.78932	1.79416	1.75489	1.68363	1.6779	1.84534	1.81415	1.83231	1.77429	1.7812
Land	GRC	2.56192	2.58603	2.59998	2.78178	2.7915	2.75464	2.6771	2.88229	2.9629	2.53122	2.31598	2.41264	2.2298	2.12419	2.02328	2.04705	1.84152	1.94817	2.16173	1.88593	1.98765
Land	HRV	1.22477	1.34452	1.41186	1.5202	1.55893	1.59028	1.54426	1.48055	1.70321	1.47421	1.51437	1.50331	1.44664	1.66379	1.65163	1.53132	1.57619	1.62453	1.67488	1.48068	1.52262
Land	HUN	1.94699	1.74293	1.81583	1.74729	2.14058	2.17909	1.63729	1.65396	1.75293	1.49997	1.09737	1.5785	1.40986	1.42448	1.46189	1.27425	1.44956	1.30168	1.41563	1.32101	1.3156
Land	IRL	4.63838	5.37758	4.82399	5.25883	4.57429	4.80997	4.54353	5.67518	5.24771	4.9103	3.74805	3.3892	2.55541	3.19932	4.11002	3.09109	5.14843	4.45633	4.61952	6.10427	3.08059
Land	ITA	1.71048	1.69979	1.80374	1.86	1.88823	1.86773	1.91136	1.85401	1.89475	1.75904	1.83057	1.85376	1.63007	1.5648	1.49311	1.53954	1.46039	1.55213	1.58565	1.40766	1.35632
Land	LTU	4.15843	3.48783	3.4883	3.11106	3.29666	3.22178	3.32555	3.28745	2.95934	2.58767	2.42041	2.46783	2.07398	1.99869	1.82042	1.92384	3.16075	2.77776	2.77748	2.89238	2.9525
Land	LUX	5.50673	4.97821	3.93982	4.2098	4.33941	4.93644	4.74127	4.44514	5.01586	5.00821	4.87082	6.16334	6.37061	8.37633	7.36264	5.98858	6.66351	4.9164	5.17446	8.38311	6.51001
Land	LVA	3.00744	3.05489	3.14376	3.19202	3.34984	3.39259	3.83603	3.9136	2.95065	2.68829	2.4898	3.06364	4.09804	2.67395	2.83312	2.44989	2.64216	2.69219	3.09635	2.77112	2.70929
Land	MLT	0.0844747	0.0569647	0.0459491	0.066014	0.0829224	0.0874558	0.0696822	0.0622557	0.0651362	0.0542666	0.0511056	0.0509267	0.0528709	0.0492012	0.0414562	0.162521	0.307889	0.381146	0.672376	0.725279	0.79753
Land	NLD	3.61297	3.02269	3.01756	3.26186	3.15126	2.84959	2.71463	2.81174	2.89019	2.76132	1.80959	1.97577	2.07721	1.98811	2.25879	3.01781	2.509	2.70392	2.69852	2.62543	2.41153
Land	POL	1.88453	1.93941	1.75163	1.7389	1.70114	1.76014	1.75621	1.77251	1.88883	1.69504	1.77948	1.82847	1.73034	1.58877	1.5795	1.55436	1.62892	1.62847	1.71395	1.60871	1.51845
Land	PRT	1.83088	1.81183	1.7945	1.94663	1.77836	1.72326	1.68841	1.758	1.90794	1.82022	1.84267	1.7911	1.58302	1.56976	1.62985	1.65991	1.46382	1.50802	1.61926	1.48841	1.44913
Land	ROM	1.72929	1.79221	1.86539	2.01452	1.95762	1.87746	1.90877	1.86409	1.81314	1.70401	1.80106	1.81916	1.45672	1.29807	1.32354	1.03778	1.23632	1.30004	1.23242	1.19266	1.25926
Land	SWE	1.68704	1.57273	1.71734	1.73702	1.85751	1.7866	1.74153	1.87762	1.80875	1.92024	2.08445	2.1965	2.18609	2.23624	2.07328	1.9216	1.83314	1.97337	1.9384	1.8699	1.86549
Land	SVN	1.80464	1.64889	1.72857	1.83518	1.91507	1.81269	1.7283	1.82785	1.99816	1.85237	1.82144	1.8511	2.0864	1.90474	1.52955	1.52781	1.29563	1.33932	1.3817	1.35257	1.42316
Land	SVK	1.63721	1.382	1.57311	1.53613	1.58172	1.41636	1.29011	1.43127	1.72566	1.52692	1.24631	1.32493	1.16585	1.25504	1.42015	1.32511	1.39775	1.30784	1.5002	1.66338	1.44294
Land	GBR	2.27094	2.13	2.42298	2.39818	2.37014	2.56503	2.5039	2.28584	2.17582	2.18214	2.01712	2.08084	2.10307	2.0372	2.08876	2.32459	1.81686	1.94989	2.06719	1.83771	1.83206
Land	USA	2.51783	2.53161	2.68049	2.54209	2.54123	2.60611	2.58919	2.25566	2.18626	2.07319	2.07621	2.11235	2.03635	2.02962	2.05111	2.06523	2.09378	2.08595	1.98884	2.00916	2.05658
Land	JPN	1.5432	1.50751	1.26802	1.43199	1.47916	1.57782	1.54099	1.51203	1.68074	1.34521	1.52918	1.55845	1.53904	1.37411	1.30519	1.19134	1.03058	1.13498	1.06047	1.12257	0.992622
Land	CHN	0.624214	0.637654	0.615152	0.636532	0.671908	0.667626	0.643548	0.682158	0.699744	0.734596	0.754557	0.801569	0.823667	0.871095	0.916114	0.963623	0.977573	0.976644	1.03856	1.12149	1.15566
Land	CAN	2.69957	2.30499	2.58497	2.92947	2.82306	3.09534	2.6087	2.73558	2.28929	2.55656	2.60914	2.58111	2.59263	2.50056	2.41913	2.53929	2.42129	2.57942	2.41645	2.55364	2.49804
Land	KOR	1.09257	1.09336	1.22116	1.22965	1.33582	1.43911	1.51101	1.51572	1.53695	1.23607	1.60464	1.74058	1.70369	1.74272	1.65027	1.60668	1.55739	1.65853	1.59907	1.49779	1.37096
Land	BRA	2.4401	2.26047	2.30744	2.26854	2.01492	2.08026	2.03791	1.99672	2.0254	2.03475	2.03227	2.04296	1.97285	1.96663	1.94755	1.89199	2.04002	1.99198	1.85763	1.78785	1.6165
Land	IND	0.494225	0.493587	0.484745	0.493944	0.484534	0.482186	0.488479	0.482059	0.433181	0.457776	0.441839	0.426407	0.408874	0.381491	0.41505	0.434493	0.46215	0.458184	0.444718	0.450566	0.44264
Land	MEX	1.77656	1.84134	1.77391	1.74201	1.71969	1.76967	1.73324	1.74177	1.74033	1.63736	1.5074	1.53703	1.50923	1.50489	1.45959	1.55524	1.39363	1.45854	1.42871	1.36066	1.2115
Land	RUS	2.84493	3.20338	2.88826	2.54327	3.40201	2.98461	3.2653	2.99103	3.13585	2.83387	3.0427	3.00399	2.85175	3.16967	2.77889	2.60658	2.13351	2.91036	2.87796	3.0051	2.92507
Land	AUS	7.01627	7.81028	7.7842	7.91784	6.85153	6.94249	7.04552	6.28318	5.02333	6.08716	3.82087	4.74283	4.97822	4.72272	4.5981	4.28338	3.30382	4.4588	3.32236	2.46691	3.43713
Land	CHE	1.96894	1.84479	1.79135	2.1933	1.88638	1.83855	1.67457	1.76607	1.9539	2.04054	1.86769	2.21652	1.94849	2.08189	1.93811	2.06628	2.05442	2.16105	1.98297	2.12143	2.27628
Land	TUR	1.59223	1.46573	1.56993	1.60157	1.39422	1.43646	1.4683	1.54094	1.63826	1.31939	1.63999	1.69464	1.63056	1.6181	1.60074	1.59168	1.40616	1.51097	1.46232	1.27299	1.27447
Land	TWN	0.60271	0.417793	0.468859	0.487829	0.523722	0.592255	0.53001	0.464579	0.489745	0.431475	0.513208	0.438345	0.365884	0.449382	0.449398	0.420819	0.336562	0.364678	0.383893	0.34585	0.318033
Land	NOR	1.42737	1.50892	1.61521	1.68339	1.59158	1.63804	1.7763	1.86157	2.00529	1.75605	1.93974	2.12645	2.03874	1.99472	1.72191	1.78505	1.67412	1.84696	1.72977	1.83878	1.58039
Land	IDN	0.323474	0.334264	0.339308	0.374594	0.392592	0.378155	0.409723	0.408043	0.433791	0.395309	0.498205	0.522654	0.464714	0.462391	0.511561	0.485053	0.462235	0.465977	0.517552	0.460577	0.436048
Land	ZAF	0.82949	0.745849	0.731692	0.812471	0.826608	0.821593	0.874182	0.902844	0.833272	0.872734	0.838023	0.823967	0.787017	0.769657	0.724817	0.748749	0.632336	0.740849	0.69738	0.681378	0.639954
Land	WWA	0.930012	0.855601	0.920092	0.876766	0.871898	0.86389	0.831175	0.847724	0.890403	0.99131	0.987228	0.858666	0.961457	0.980604	0.916534	0.918802	1.11647	0.928104	1.02793	0.961584	1.02328
Land	WWL	1.73743	1.92657	1.799	1.78476	1.7135	1.75296	1.95683	2.14514	2.20109	2.13664	2.10675	2.02722	2.12239	2.13929	2.15653	1.95458	1.79311	1.76636	1.48073	1.45415	1.59834
Land	WWE	2.11124	2.25516	1.85595	2.33893	1.91311	1.73832	1.94336	1.98309	1.55685	1.45568	1.44172	1.27207	1.18317	1.37455	1.23288	1.23619	1.37199	1.35705	1.31744	1.44525	1.37891
Land	WWF	1.11352	1.13995	1.16246	1.15432	1.1383	1.13099	1.09376	1.12882	1.08145	1.06637	1.07977	1.10641	1.01506	1.03225	1.03292	1.03334	0.9954	0.959934	0.942439	0.945398	0.93819
Land	WWM	0.807996	0.821544	0.857798	0.854563	0.818957	0.962087	0.982062	1.07831	1.26576	1.53241	1.47507	1.4883	1.65211	1.47448	1.59834	1.59437	1.44982	1.51219	1.53785	1.57668	1.48159
Land	Advanced	2.34362	2.28949	2.35298	2.37986	2.36727	2.41517	2.37927	2.25323	2.22665	2.11217	2.06371	2.13504	2.07747	2.01398	1.98981	1.9781	1.91473	1.99419	1.9431	1.88728	1.8736
Land	EmergingDeveloping	0.934073	0.944538	0.931734	0.928448	0.932175	0.926084	0.931871	0.954081	0.959513	0.979763	0.988584	0.97727	0.981597	0.993358	0.996648	0.996795	1.00222	0.989011	0.99459	1.00134	1.00477
Land	Global	1.15233	1.15144	1.14899	1.14894	1.14886	1.14956	1.14783	1.14686	1.14657	1.14592	1.1453	1.14495	1.13903	1.13897	1.13821	1.13654	1.13205	1.13189	1.12928	1.12703	1.12791
Nitrogen	AUT	2.21828	2.40578	2.6191	2.4092	2.33463	2.21647	2.35305	2.47763	2.64365	2.36589	2.43558	2.71899	2.65146	2.88151	3.26175	3.08881	2.96089	4.67393	2.97146	4.56681	3.84805
Nitrogen	BEL	3.11277	3.08441	3.10125	3.4472	3.63986	3.3369	3.5555	3.6066	4.02037	3.85645	3.47308	2.88984	3.01161	3.16298	3.48188	2.93744	3.0659	3.46154	3.32076	3.06163	3.08204
Nitrogen	BGR	1.68132	2.07789	3.34336	3.8408	2.93775	2.3625	1.87137	2.53676	2.40866	3.22092	1.90939	2.2887	2.25017	2.15213	1.94875	2.08655	2.02333	2.16769	1.89032	2.10345	2.27704
Nitrogen	CYP	0.841399	0.769233	0.804958	0.905948	0.923009	0.73278	0.726142	0.728883	0.880375	0.852995	0.983154	0.835767	0.969743	0.719487	0.665487	0.87038	0.926525	1.35584	1.33708	2.05365	2.14816
Nitrogen	CZE	2.35569	2.66949	1.82425	2.11804	2.02852	1.96863	2.20795	2.29074	2.3209	2.21174	2.21633	2.25576	2.73646	2.51803	3.25362	2.843	2.64242	2.92709	2.71475	2.67438	2.5657
Nitrogen	DEU	2.7095	2.66946	2.55029	2.92799	3.02361	2.88451	2.80616	3.13652	2.92628	2.7787	2.96563	3.07478	2.99649	3.06753	3.32562	3.09034	2.92757	3.26395	3.01796	3.35574	3.04588
Nitrogen	DNK	4.62585	4.19958	3.34137	3.02359	3.78597	3.2237	3.19042	3.67462	3.49788	3.19118	2.75507	3.59865	3.81129	3.29307	3.97703	3.89744	3.5921	4.51574	3.74127	4.12292	4.59598
Nitrogen	EST	1.59032	1.50757	1.45942	1.94085	2.03444	1.63477	1.98379	1.68441	2.4625	1.66184	1.40409	1.4433	1.56079	1.94917	1.93162	2.37476	1.90202	2.48415	2.77827	2.10301	4.05918
Nitrogen	ESP	2.98557	3.19938	3.20834	3.50922	3.42512	3.1601	3.17571	3.29964	2.79285	2.6315	2.92524	2.76533	2.56576	2.57034	2.95053	2.86453	2.59166	2.86432	2.90888	2.63437	2.88888
Nitrogen	FIN	3.22949	3.01753	2.85508	3.50151	3.49525	3.40991	3.50601	3.55532	3.65198	3.58774	3.39922	3.39606	3.48104	3.6323	3.54941	3.52896	3.37083	3.57444	3.5026	3.61157	3.93196
Nitrogen	FRA	3.25942	3.47477	3.25437	3.43011	3.43364	3.33643	3.43267	3.62821	2.94337	2.73699	2.78017	2.74383	3.70795	2.97441	2.97951	3.01403	3.1485	3.29752	2.92406	2.82703	2.86528
Nitrogen	GRC	3.14099	2.93709	2.82916	3.10294	3.28842	2.91563	2.78372	3.2229	3.066	2.69485	2.86726	2.71806	2.45266	2.64864	2.30127	2.15812	2.05494	2.31652	2.48933	2.4018	2.59558
Nitrogen	HRV	0.302142	0.290419	0.332225	0.442627	0.412861	0.419633	4.17029	4.37096	5.71269	2.17934	2.65706	3.08671	2.37319	1.91343	1.82975	2.02179	1.70161	2.26472	2.29118	2.28891	2.51223
Nitrogen	HUN	2.76005	2.54432	2.51727	2.23891	2.68148	2.43505	2.14382	2.50535	2.53094	1.95337	1.63903	2.2371	2.05341	2.51609	2.44139	2.19369	2.659	2.6945	2.74531	2.65371	2.9224
Nitrogen	IRL	7.00323	7.63829	8.56919	8.82191	6.86324	6.74764	6.60575	7.64882	6.5511	7.4398	5.61321	4.78565	4.03468	4.97656	6.56892	5.13574	6.5429	7.06735	7.28966	8.52061	5.89782
Nitrogen	ITA	2.15902	2.16578	2.38035	2.54658	2.64989	2.48438	2.71291	2.71775	2.40209	2.08179	2.11875	2.1746	2.11656	2.06469	2.11947	2.19805	2.10572	2.35966	2.33179	2.131	2.0979
Nitrogen	LTU	2.68169	2.79629	3.26684	3.28988	3.4301	3.21154	3.36505	2.90431	3.16804	2.67136	2.4661	2.66365	3.61408	2.95848	3.20569	3.24701	5.54527	4.05959	3.78875	4.54655	5.21183
Nitrogen	LUX	6.674	6.98258	5.6061	7.12458	7.82634	7.70816	7.6826	7.22177	7.86073	7.14728	7.18533	7.81764	7.68015	10.1024	10.7285	9.42189	9.16192	9.08801	7.70878	10.2205	11.6254
Nitrogen	LVA	1.21373	1.34061	1.20031	1.69024	1.69771	2.04082	2.30364	2.13655	2.0018	1.87451	1.87278	2.19989	2.4574	2.79795	2.99463	2.45556	1.22809	2.92149	2.73264	3.09599	1.36266
Nitrogen	MLT	0.565284	0.256528	0.205722	0.204853	0.221476	0.239578	0.23617	0.210878	0.141008	0.140501	0.172765	0.153372	0.178273	0.172355	0.163062	0.337418	0.625676	0.852552	1.34985	2.9509	1.8793
Nitrogen	NLD	3.74023	3.85358	3.84893	3.99243	4.06147	3.59194	3.60233	3.91547	3.60415	3.54267	2.58531	2.68375	2.91078	2.78274	3.16003	4.30416	3.02596	3.61559	3.33799	3.37957	3.49807
Nitrogen	POL	2.23676	2.269	2.10725	2.25766	2.22248	2.56785	2.69126	3.03091	3.00159	2.6617	3.02636	3.02087	0.852543	2.84646	0.834528	2.74827	0.967276	1.6676	2.51166	1.64778	1.78842
Nitrogen	PRT	1.7711	1.75495	1.90026	2.00116	1.77196	1.65583	1.664	2.03589	1.98354	1.87806	2.02395	1.88023	1.74591	1.82509	2.14817	2.03794	1.76662	1.9211	1.9423	1.95802	1.96552
Nitrogen	ROM	1.10682	1.24573	1.15913	1.3033	1.45	1.56644	1.39744	1.60154	1.63039	1.6846	1.65836	1.81211	1.40096	0.473162	1.64355	1.60799	1.53669	1.83301	1.94004	1.96358	2.21744
Nitrogen	SWE	2.67909	2.63143	2.64901	2.7715	2.77595	2.58804	2.66	2.93744	3.02938	2.68252	3.12821	3.19464	2.99645	3.26441	3.35073	3.38015	3.14797	3.493	3.18477	3.18371	3.43935
Nitrogen	SVN	2.44706	2.3191	2.27679	2.47593	2.35407	2.1449	2.21304	2.33942	2.26036	2.19077	2.21525	2.2594	2.04317	2.19321	2.20389	2.13251	1.6524	1.9609	1.81941	2.1247	2.34021
Nitrogen	SVK	1.64904	1.44502	1.61806	1.55739	1.61568	1.50765	1.56649	1.67754	1.85028	1.8574	1.70852	1.73311	1.57235	2.04182	2.5129	2.06675	2.01713	1.37454	3.73835	3.98895	4.31472
Nitrogen	GBR	3.08957	3.35327	3.3997	3.39924	3.54571	3.5739	3.5283	3.43885	3.23273	3.04646	2.92765	2.96931	3.09607	3.04356	3.48246	3.72267	2.9713	3.2699	3.21799	3.16905	2.97998
Nitrogen	USA	3.66677	3.80761	4.08462	4.23028	3.97702	3.94499	4.2587	3.92879	3.49099	3.62227	3.77597	3.99705	4.06722	4.08209	4.2494	4.22844	3.89331	3.94954	3.85822	3.9999	4.07073
Nitrogen	JPN	1.71382	1.82996	1.68327	1.83258	1.82754	1.91009	1.93294	2.02699	2.00013	1.78955	1.9164	2.13746	2.34373	2.32825	5.02156	3.89964	1.46169	1.66482	1.57818	1.68141	1.98659
Nitrogen	CHN	1.52414	1.56491	1.72831	1.76148	1.92812	1.96547	2.01339	2.03757	2.15173	2.25109	2.32392	2.45242	2.45902	2.44395	1.97064	2.03838	2.63854	2.63687	2.57996	2.48542	2.42493
Nitrogen	CAN	3.2068	3.2295	3.55315	4.027	3.65232	4.17446	3.46143	4.71045	4.12942	4.40186	4.80919	5.36204	5.81237	5.42015	5.35082	5.30555	4.72707	4.86566	5.03838	4.95841	5.41526
Nitrogen	KOR	1.80078	1.92542	2.43629	2.31312	2.29753	2.48628	2.41603	3.05919	2.47255	1.94301	2.23551	2.64179	2.98527	3.35014	5.43149	4.60593	2.16027	2.4351	2.46185	2.41568	2.77523
Nitrogen	BRA	0.947139	0.898215	1.05875	1.2528	1.25536	1.09888	1.1903	1.5083	1.40927	1.22238	1.57861	1.88456	1.61793	1.91499	2.21283	1.59711	1.71643	2.05033	1.99523	2.08452	2.27601
Nitrogen	IND	0.996615	1.03691	0.949727	1.00861	1.05068	1.136	1.22527	1.27517	1.27559	1.35753	1.42275	1.4763	1.41227	1.38871	1.4622	1.52502	1.4701	1.51554	1.53994	1.64602	1.77716
Nitrogen	MEX	1.57468	1.72288	1.45564	1.43693	1.24981	1.525	1.42037	1.52381	1.31935	1.34259	1.28527	1.57765	1.63744	1.67596	1.67822	1.49111	1.60491	1.62673	1.49479	1.37926	1.44177
Nitrogen	RUS	0.724135	0.768583	0.545753	0.580046	0.85465	0.764832	0.948933	1.01946	1.16866	1.08676	1.26915	1.32898	1.34016	1.57012	1.39854	1.17539	1.16443	1.31774	1.21893	1.38582	1.43045
Nitrogen	AUS	3.09397	3.68144	3.50361	4.13446	3.84082	3.54946	3.62079	3.78403	2.99244	3.32576	3.30362	3.77844	3.6633	3.89701	4.34375	4.50583	3.40441	3.8719	3.21027	3.20884	4.2783
Nitrogen	CHE	1.92009	2.05326	1.96557	2.10966	1.9865	1.99969	1.96857	2.02316	2.25561	2.35055	2.38611	2.81347	2.72928	2.82403	2.82813	2.99639	2.53483	2.99256	2.40655	2.72193	3.06537
Nitrogen	TUR	1.96839	1.60481	1.81312	1.94261	1.86566	1.95365	2.03395	2.02582	1.81251	1.97944	2.31649	2.1115	2.24175	2.33063	2.27404	2.18479	2.55257	2.48778	2.07297	2.29981	2.85299
Nitrogen	TWN	6.34405	2.80734	1.86147	1.25283	0.987114	0.939244	0.869439	0.816338	0.77613	0.740179	0.964519	0.819238	0.74072	0.919514	0.9053	0.882907	0.671363	0.731785	0.686773	0.743539	0.70679
Nitrogen	NOR	2.89282	3.15738	3.438	3.57653	3.01113	3.11469	3.47102	3.64254	3.85155	3.3567	3.35438	3.81878	3.60753	3.94114	3.73152	4.04936	3.26647	3.75915	3.31245	3.96267	3.75977
Nitrogen	IDN	0.696277	0.677606	0.720806	0.776304	0.850504	0.857403	0.931661	0.947494	1.01187	1.0269	1.10844	1.19702	1.18484	1.12554	1.2059	1.16909	1.18968	1.16228	1.35288	1.21313	1.43946
Nitrogen	ZAF	0.906173	0.733659	0.875391	0.904812	0.912193	0.741425	0.915062	1.04209	0.86558	0.846622	0.816629	0.812744	0.905757	0.857824	0.785665	0.755605	0.642787	0.926885	0.914993	1.00251	1.06076
Nitrogen	WWA	0.832334	0.776889	0.868086	0.876718	0.903223	0.908897	0.79947	0.846347	0.850124	1.12296	1.10952	1.00499	1.08665	1.18153	1.19675	1.30432	1.36653	1.18674	1.31265	1.14292	1.38536
Nitrogen	WWL	0.72289	0.772039	0.714088	0.74	0.770952	0.715228	0.855097	0.991964	1.00644	0.910143	1.03575	1.0571	1.09707	1.133	1.26581	1.149	1.05845	1.1492	1.06145	1.05214	1.24969
Nitrogen	WWE	0.776779	0.890395	0.751761	1.02366	0.903079	0.901037	1.39823	1.5935	1.50129	1.3999	1.34734	1.42886	1.43855	1.78456	1.38119	1.45951	1.59985	1.59644	1.58415	1.68478	1.85679
Nitrogen	WWF	0.18705	0.189044	0.257303	0.232041	0.248506	0.247377	0.259283	0.269355	0.267745	0.263487	0.332628	0.330794	0.330345	0.348096	0.368695	0.354441	0.369012	0.409852	0.374544	0.387982	0.439801
Nitrogen	WWM	1.17045	1.27293	1.20325	1.0647	1.09971	1.14164	1.34464	1.40091	1.54102	1.55236	1.5387	1.59155	1.73328	1.77566	1.92286	1.75065	1.79776	1.73954	1.68796	1.80692	1.91101
Nitrogen	Advanced	3.13464	3.17195	3.23129	3.39734	3.3072	3.27383	3.37605	3.45618	3.14476	3.04237	3.14664	3.31482	3.35707	3.40157	3.94192	3.81364	3.06259	3.28856	3.1971	3.24376	3.35071
Nitrogen	EmergingDeveloping	0.96831	0.981501	1.01595	1.04189	1.10131	1.12277	1.16958	1.2193	1.24409	1.31008	1.3721	1.41566	1.41612	1.44368	1.3751	1.37119	1.5144	1.51915	1.51318	1.49922	1.59908
Nitrogen	Global	1.30374	1.31847	1.35459	1.39972	1.43439	1.44558	1.49879	1.55123	1.52467	1.56426	1.63077	1.69071	1.69496	1.72302	1.74098	1.71902	1.73467	1.77065	1.7523	1.74672	1.84735
Phosphorus	AUT	4.01849	4.15672	4.13292	4.19498	3.79557	3.47126	3.51746	3.65086	3.52653	2.6114	3.08304	3.36278	3.40116	3.61709	3.77365	3.80142	3.66095	4.03932	3.67516	3.55616	3.83045
Phosphorus	BEL	3.93889	4.00569	3.89315	4.26615	4.7201	4.07498	4.56269	4.23947	3.379	3.42709	3.50617	2.89321	3.33719	3.36066	3.31765	2.91317	2.81878	3.34516	3.13292	3.09233	3.33159
Phosphorus	BGR	0.433659	1.56871	4.87499	9.20717	1.6634	2.4351	4.28992	6.24062	6.69075	2.98966	1.81587	2.87337	3.07812	3.41027	3.35023	3.89907	4.36713	3.84428	4.37316	4.89599	5.38394
Phosphorus	CYP	2.03996	2.24936	2.56752	2.9359	2.54911	2.28828	2.29041	2.23865	1.41179	2.52695	2.59912	1.39256	2.31799	1.94103	1.66261	2.01065	2.18534	3.19847	2.87972	4.11083	4.84163
Phosphorus	CZE	2.11421	2.53955	1.94843	2.2679	2.2076	2.22238	2.67187	2.72608	2.14825	2.0589	2.2488	2.51836	2.48448	2.42081	2.38538	2.60737	2.26672	3.04197	2.72053	2.95922	2.95417
Phosphorus	DEU	3.29657	2.81467	2.89114	3.01056	3.3626	3.02346	3.03838	3.29123	2.37108	2.56553	3.03601	2.89214	3.19584	3.14758	3.33203	3.25207	2.99104	3.24223	2.89633	3.23602	2.99567
Phosphorus	DNK	4.01487	4.06874	3.3279	3.26181	4.85958	4.19512	3.64224	4.42821	3.32393	2.81763	3.23096	3.89878	3.84668	3.96108	3.56425	4.15111	3.57324	4.3711	3.7169	4.06032	4.25238
Phosphorus	EST	1.86235	1.45936	1.67138	2.43165	2.84676	2.51232	3.28043	2.30307	3.30143	1.73438	1.74922	2.27425	2.42093	3.18731	2.89475	3.10135	2.42206	4.1121	3.5536	3.46779	5.18763
Phosphorus	ESP	6.32376	6.71795	6.86045	7.04909	7.15587	6.22162	5.72446	6.82912	3.88325	3.43183	4.22734	4.33497	4.36809	4.57438	4.34558	4.32103	4.31914	4.37755	4.39592	4.63725	4.89843
Phosphorus	FIN	4.77856	3.87381	4.28853	4.98904	4.8972	4.51386	4.6945	4.669	3.35481	3.96421	3.37354	3.50788	3.77974	3.83509	3.96578	3.76786	3.27142	4.0268	3.70175	3.87142	3.59292
Phosphorus	FRA	5.66813	5.34738	5.03825	5.18276	5.11296	4.65042	4.58361	4.84987	2.76284	1.99366	2.65831	2.48006	3.61011	3.79447	3.59778	3.52667	3.35017	3.66146	3.40972	3.39563	3.62398
Phosphorus	GRC	5.46468	5.58473	4.82904	5.63778	5.27867	4.72295	4.65374	4.5974	4.00215	3.45732	4.07174	3.48363	3.43003	3.63014	3.15903	2.99379	2.84148	3.21395	3.55363	3.5105	3.74192
Phosphorus	HRV	0.581283	0.630883	0.644847	0.798406	0.840508	0.794437	8.16428	7.28824	9.13062	4.65395	9.75862	9.16214	3.59676	3.71153	4.42971	3.5094	1.82156	4.36246	4.31674	4.55484	5.06785
Phosphorus	HUN	2.09658	2.55821	2.90151	2.94994	3.47397	2.84224	3.13443	3.72305	2.69181	1.82713	1.81097	2.03019	2.33981	3.08878	2.94147	2.97216	3.31239	4.4961	3.92855	4.05451	4.29155
Phosphorus	IRL	9.12189	10.8812	11.9146	11.1304	9.22271	8.76175	8.20052	9.30665	6.35761	7.58947	6.46175	5.23625	4.60162	6.157	5.98991	5.45479	6.58259	7.95479	7.05263	9.57893	5.7763
Phosphorus	ITA	4.73227	3.81012	3.67336	3.85051	4.10256	3.68069	3.86637	3.93182	2.88477	2.52832	2.92441	2.95109	2.92047	2.76307	2.69727	2.74145	2.66766	2.95474	2.80285	2.74986	3.13721
Phosphorus	LTU	2.42989	2.4042	3.71608	3.93797	4.22345	4.08589	4.91704	3.41715	3.05627	2.81895	2.49468	2.81133	4.32176	4.35414	5.34924	6.02344	6.35611	6.44429	6.27146	6.95887	7.77609
Phosphorus	LUX	8.70708	9.0711	6.3924	7.85269	9.01027	8.70012	8.69144	7.27794	6.34815	5.68371	7.25921	7.45162	7.72007	10.6626	10.4877	8.98309	7.38103	8.49212	7.37807	9.31689	10.6891
Phosphorus	LVA	1.92342	2.42501	1.59746	1.94042	3.54097	3.35294	3.55205	2.93012	2.51708	1.98174	2.4748	2.72436	4.04309	5.16385	4.89885	5.1293	4.49861	5.89975	5.47151	6.01925	6.73769
Phosphorus	MLT	0.84869	0.435692	0.25227	0.332923	0.480812	0.323649	0.273507	0.278332	0.192058	0.0809545	0.150459	0.215946	0.158714	0.162921	0.127009	0.421419	1.17778	2.07285	2.10801	6.59628	4.51993
Phosphorus	NLD	4.92167	4.55112	4.61686	4.99185	5.97088	4.65435	4.59359	5.00825	3.48253	3.28867	3.02824	3.12168	3.47538	3.43433	3.52146	4.13262	3.58738	4.37088	3.94002	4.02141	4.0515
Phosphorus	POL	3.48287	3.63183	3.33535	3.6055	3.58724	4.88166	4.56168	5.2413	4.32794	4.0116	4.89692	4.39205	4.50738	4.01097	3.59227	3.84472	4.17864	4.10301	3.93213	4.18184	3.69501
Phosphorus	PRT	3.85114	4.0322	3.91319	4.01113	3.73507	3.30433	3.46618	4.37145	2.91194	2.27428	3.11498	2.38495	2.4268	2.75244	2.77975	3.14317	2.71949	2.92648	2.78579	2.93701	3.06238
Phosphorus	ROM	1.19538	1.72734	1.56307	2.07378	2.14157	3.08571	2.34648	2.71014	2.6314	2.60396	3.13017	3.37346	2.85096	2.48106	2.99851	3.43391	3.13653	3.67599	4.62131	5.08339	4.94718
Phosphorus	SWE	3.67387	3.48093	3.33705	3.75843	3.74945	3.46602	3.28906	3.39797	3.17804	2.17876	3.18158	3.27263	3.43769	3.74318	3.47486	3.54706	3.26473	3.83879	3.31663	3.62077	3.90758
Phosphorus	SVN	5.14384	4.89985	4.28157	4.63671	4.56852	3.96139	4.03441	4.10291	3.83338	2.77142	3.4035	3.27997	2.81565	3.55284	3.30833	3.39415	2.31625	3.0576	2.58566	2.94685	3.39211
Phosphorus	SVK	1.91039	1.97403	1.80579	1.80859	1.86248	1.94653	2.21566	2.20501	1.95481	1.92495	1.87119	2.1909	2.27269	2.64822	2.93985	2.76262	2.48365	2.84623	3.27617	3.9131	3.57801
Phosphorus	GBR	4.42402	4.27446	4.49428	4.61193	4.95832	5.17984	4.90257	4.27416	3.59887	2.87718	3.32199	3.13082	3.77689	3.55264	3.64091	3.93409	3.53086	3.5762	3.20933	3.26973	3.03006
Phosphorus	USA	6.56659	7.04861	6.91023	7.37855	7.7277	7.48864	7.63112	6.82934	5.33302	6.37762	6.73539	6.64321	7.15553	7.13441	6.79571	7.11103	6.93322	6.96149	6.67683	6.81307	7.15661
Phosphorus	JPN	4.36722	4.15804	3.67174	3.98915	3.69596	3.7557	3.92403	3.88482	3.12793	2.94421	3.70855	3.79516	4.07534	3.77402	3.77036	3.39298	2.94889	3.48455	3.14872	3.34728	3.15088
Phosphorus	CHN	2.48091	2.80744	3.21695	3.02782	3.5092	3.73967	3.84874	3.33369	3.52964	4.27309	4.74257	4.78365	4.8035	4.91657	4.88436	4.78714	4.71943	4.69099	4.6787	4.58126	4.88719
Phosphorus	CAN	5.28405	5.14947	5.59701	7.47881	6.17875	6.77685	6.41817	7.60654	6.99952	6.4901	7.62745	9.38305	9.41606	10.0873	9.62468	10.1601	9.6127	10.8001	11.1841	10.2265	11.5437
Phosphorus	KOR	3.47366	3.25545	3.94892	3.89957	3.36411	3.59202	3.68137	4.38559	2.99015	3.02785	3.84977	4.33066	4.59437	4.60333	4.31588	4.12558	3.89022	4.53601	4.56078	4.63797	3.86166
Phosphorus	BRA	5.53056	5.63962	6.17683	7.14297	7.91562	6.07268	6.29091	8.16176	7.2161	5.24546	6.42184	7.9571	7.21837	8.73027	8.93322	7.05664	7.31576	8.07192	7.86362	7.26378	9.05871
Phosphorus	IND	1.52065	1.47067	1.31439	1.48912	1.59473	1.77267	1.88981	1.72582	2.07823	2.412	2.74614	2.67921	2.1599	1.8849	1.94831	2.2348	2.16183	2.33287	2.31234	2.5572	2.87452
Phosphorus	MEX	1.99905	2.01319	2.02024	1.90243	1.94906	2.03807	2.01721	1.72816	1.19739	1.53818	1.5686	1.51874	1.60198	1.76349	1.99247	2.19838	2.13377	1.99357	2.14051	2.30854	1.5961
Phosphorus	RUS	0.885488	0.920034	0.959083	1.04159	1.3397	1.47214	1.79364	1.88	1.9662	1.7958	2.42753	2.58508	2.69504	2.79348	2.69141	2.15308	2.14075	2.47766	2.40976	2.49668	2.60089
Phosphorus	AUS	7.29406	9.82156	12.5757	15.1341	16.3982	16.5495	15.9775	16.41	12.7449	11.0983	13.0317	13.9718	14.3716	13.0102	13.7535	14.9652	13.5116	16.3012	13.2863	13.2411	14.6275
Phosphorus	CHE	3.02405	3.18339	3.07289	3.07332	3.0984	2.9057	2.93874	2.91117	2.6958	2.81886	3.27583	3.83071	3.71968	4.18322	3.83447	3.89834	3.61388	4.12974	3.18452	3.78394	4.28028
Phosphorus	TUR	3.35898	2.60166	2.89819	3.34868	3.27798	3.40916	3.55873	3.10777	2.12166	3.30353	3.83775	3.3773	3.15306	3.58279	3.29176	3.4497	4.59168	4.43499	3.49253	3.7181	4.38946
Phosphorus	TWN	11.3787	5.98801	3.64999	2.62139	2.10875	1.88209	1.91835	1.63957	1.34484	1.27858	2.11907	1.65516	1.77654	2.10873	2.06731	1.88445	1.53334	1.77104	1.66617	1.53343	1.4649
Phosphorus	NOR	4.43341	4.77516	4.79083	5.04015	4.51264	4.4074	4.80291	4.755	4.22302	3.89961	4.25134	4.16157	4.50747	4.91855	4.27562	4.54863	3.95069	4.80248	3.85401	4.42042	4.4777
Phosphorus	IDN	0.254916	0.242666	0.281412	0.595232	0.560864	0.45092	0.743234	0.752077	0.691547	0.910154	1.03989	1.211	2.4957	1.91169	2.48634	2.73278	2.54484	3.08175	2.96339	1.59684	1.40927
Phosphorus	ZAF	1.76291	2.15482	1.93573	1.97821	2.18503	1.44718	1.8535	1.50604	1.46478	1.60132	1.76724	1.80211	1.94482	2.57084	2.28922	2.28395	1.93626	2.45281	2.70474	2.85223	2.5466
Phosphorus	WWA	1.53651	1.4289	1.55242	1.49525	1.57095	1.68472	1.60064	1.7947	1.36498	1.7476	1.79985	1.81077	1.77205	1.97551	2.04844	1.9115	2.39663	2.0081	2.38812	1.89468	2.43894
Phosphorus	WWL	1.57276	1.84688	1.49736	1.699	1.87016	1.91226	2.37892	2.9817	2.16932	1.7937	2.81554	2.97677	3.10717	3.33602	3.24729	2.73854	2.50945	2.6034	2.38847	2.22095	2.7876
Phosphorus	WWE	0.810348	0.808015	0.760367	1.06935	1.19462	1.45445	2.27455	2.57889	2.34699	2.19579	2.1547	2.5206	2.51753	2.67399	2.13675	2.15207	2.21267	2.41255	2.40806	2.34625	2.8889
Phosphorus	WWF	0.406431	0.401549	0.486067	0.454295	0.414661	0.391873	0.444159	0.514896	0.398595	0.462324	0.56003	0.56734	0.666705	0.632583	0.6259	0.649857	0.637061	0.703309	0.584453	0.672446	0.682818
Phosphorus	WWM	2.03276	2.00494	1.9123	1.7282	1.93429	2.04846	2.42703	2.7656	2.0405	2.45012	2.61329	2.81802	2.30204	2.58854	2.66614	2.67804	2.33954	2.70152	2.40056	2.74289	3.32925
Phosphorus	Advanced	5.46611	5.42195	5.36307	5.77219	5.8063	5.68004	5.73694	5.68043	4.38621	4.4162	5.02512	5.06438	5.43162	5.40601	5.25566	5.37038	5.08925	5.45169	5.15066	5.28375	5.41114
Phosphorus	EmergingDeveloping	1.69799	1.75894	1.85443	1.8849	2.07712	2.12169	2.24507	2.22548	2.12335	2.38475	2.70067	2.76874	2.67962	2.73469	2.76848	2.70611	2.72896	2.78845	2.77326	2.68313	3.00675
Phosphorus	Global	2.28144	2.32244	2.39076	2.47544	2.6402	2.65571	2.76608	2.73815	2.45739	2.68283	3.0395	3.10122	3.07498	3.11581	3.123	3.08552	3.06477	3.167	3.11085	3.05207	3.34754
Water	AUT	0.410441	0.421928	0.390302	0.357568	0.419529	0.419492	0.415874	0.402256	0.386151	0.38036	0.299005	0.311367	0.327326	0.28037	0.314255	0.283679	0.279388	0.302042	0.299508	0.327734	0.293805
Water	BEL	0.885692	0.844774	0.732179	0.879329	0.896836	0.824744	0.875475	0.852983	1.02905	1.16279	0.550221	0.502537	0.555923	0.511311	0.565593	0.449303	0.504931	0.526573	0.483098	0.433964	0.422619
Water	BGR	0.185963	0.146945	0.128252	0.178048	0.183614	0.175823	0.175284	0.179043	0.228329	0.212117	0.129567	0.1333	0.160993	0.113761	0.125106	0.129528	0.131755	0.137605	0.11529	0.139305	0.136679
Water	CYP	0.743274	0.630239	0.561461	0.545886	0.658927	0.571012	0.579108	0.557938	0.944195	0.618207	0.506049	0.493257	0.488896	0.452961	0.459744	0.438555	0.529831	0.434896	0.506487	0.439489	0.431641
Water	CZE	0.189087	0.219286	0.251756	0.220828	0.29755	0.292705	0.236818	0.282232	0.277058	0.221789	0.1746	0.190317	0.192539	0.153497	0.154391	0.144544	0.142864	0.162795	0.139355	0.153783	0.141577
Water	DEU	0.359826	0.384987	0.327096	0.399505	0.403926	0.41925	0.48094	0.482929	0.481116	0.453445	0.380093	0.402581	0.439819	0.353602	0.357066	0.350115	0.315172	0.357655	0.332503	0.375785	0.381732
Water	DNK	0.345895	0.366164	0.319173	0.339766	0.34968	0.385034	0.433643	0.422173	0.492642	0.471511	0.301059	0.408619	0.415907	0.335151	0.362814	0.322389	0.323903	0.307919	0.311768	0.385222	0.350797
Water	EST	0.0305487	0.0815975	0.116257	0.14371	0.199908	0.201094	0.290953	0.265109	0.284895	0.21279	0.110049	0.150518	0.170146	0.172887	0.172958	0.162511	0.154396	0.161374	0.18336	0.191223	0.175108
Water	ESP	1.0143	1.05541	1.02892	1.1971	1.14942	1.31002	1.10743	1.01155	1.01932	1.10083	0.852833	0.863274	0.904906	0.702421	0.722712	0.724032	0.656785	0.700844	0.665053	0.638563	0.855343
Water	FIN	0.379277	0.399611	0.344151	0.42942	0.479571	0.468117	0.518299	0.482859	0.486684	0.521334	0.390633	0.349433	0.443124	0.388314	0.371402	0.336829	0.33337	0.357863	0.336538	0.341236	0.326034
Water	FRA	0.473767	0.478953	0.41796	0.499135	0.52611	0.513467	0.49581	0.48972	0.463834	0.378408	0.310084	0.333707	0.400496	0.35591	0.361934	0.345682	0.334902	0.356559	0.325838	0.357599	0.343412
Water	GRC	1.24883	1.13725	0.90323	1.06863	1.25995	1.08267	1.11936	1.22435	1.43488	1.14961	0.850783	0.912226	0.925994	0.770998	0.589614	0.572929	0.611825	0.629968	0.553928	0.618115	0.642419
Water	HRV	0.0861343	0.0999906	0.0985923	0.116411	0.130183	0.131184	0.140746	0.1347	0.201769	0.15356	0.101658	0.0847441	0.0845051	0.0761446	0.079526	0.0720613	0.0711234	0.0725668	0.0820824	0.111609	0.0788962
Water	HUN	0.108624	0.110671	0.122067	0.137397	0.132445	0.11953	0.125915	0.127556	0.147392	0.123738	0.0788191	0.0829689	0.0811078	0.0767084	0.0799302	0.0709358	0.0794265	0.0933723	0.0766684	0.077569	0.0772797
Water	IRL	0.474347	0.506045	0.40666	0.474271	0.490467	0.554529	0.661018	0.621234	0.628888	0.596768	0.267054	0.260425	0.258908	0.259737	0.299694	0.385277	0.431426	0.515302	0.43182	0.640011	0.440616
Water	ITA	0.565883	0.560731	0.526648	0.604554	0.556867	0.573144	0.644367	0.601719	0.556467	0.595079	0.491669	0.484529	0.458756	0.404609	0.357427	0.397295	0.374647	0.50046	0.398205	0.376921	0.368306
Water	LTU	0.00945792	0.0220449	0.0686624	0.0802672	0.126855	0.176186	0.223513	0.232493	0.281067	0.196949	0.0919608	0.105758	0.285647	0.153028	0.320183	0.142356	0.133349	0.11637	0.143182	0.174546	0.160339
Water	LUX	2.47684	2.19967	1.89723	2.18433	2.55329	2.37199	2.46063	2.38912	2.74923	2.97759	1.49964	1.39563	1.57807	1.56455	1.81319	1.32349	1.56994	1.19542	0.739835	1.47392	1.39096
Water	LVA	0.00537415	0.0232317	0.0166965	0.0396759	0.0728843	0.14359	0.408176	0.918027	0.680118	0.192638	0.096165	0.133988	0.401402	0.160051	0.403955	0.427859	0.968199	1.45581	0.968404	1.12737	1.7527
Water	MLT	0.0245236	0.0187622	0.0172674	0.022634	0.0274601	0.0301891	0.0286874	0.031336	0.0249853	0.0222363	0.0215152	0.0183043	0.0188517	0.0294838	0.0276433	0.0603608	0.131199	0.149265	0.258965	0.298263	0.247922
Water	NLD	0.783531	0.825574	0.758526	0.982488	0.816389	0.848431	0.908052	0.988038	0.859457	0.987612	0.415155	0.425211	0.558107	0.438862	0.511237	0.578552	0.434392	0.568995	0.507489	0.510248	0.562418
Water	POL	0.104933	0.116244	0.111964	0.10973	0.125051	0.110747	0.0961464	0.113297	0.127035	0.10458	0.105887	0.100266	0.115491	0.0994064	0.120944	0.154972	0.105451	0.122033	0.114524	0.126529	0.118965
Water	PRT	0.629111	0.606619	0.587243	0.598567	0.516821	0.537284	0.495552	0.515804	0.541718	0.488459	0.468668	0.427767	0.452912	0.43448	0.395642	0.445482	0.414844	0.442554	0.373917	0.433105	0.402243
Water	ROM	0.107109	0.114239	0.100023	0.122437	0.135688	0.0978696	0.117862	0.138698	0.161697	0.130434	0.116225	0.10665	0.0986075	0.0868282	0.122753	0.0963071	0.0839641	0.108593	0.107656	0.125127	0.117645
Water	SWE	0.329847	0.34025	0.310379	0.33292	0.320646	0.33026	0.382127	0.370931	0.3725	0.391989	0.387543	0.370247	0.429515	0.42989	0.430074	0.318288	0.315869	0.388205	0.317676	0.326304	0.312064
Water	SVN	0.324755	0.365427	0.335552	0.354311	0.468875	0.421909	0.412984	0.388449	0.463708	0.529686	0.511073	0.485795	0.602801	0.503284	0.392752	0.413557	0.418031	0.40558	0.372052	0.409625	0.638883
Water	SVK	0.0939994	0.135636	0.14608	0.181529	0.228847	0.192119	0.167765	0.162082	0.164454	0.157063	0.137037	0.127292	0.136229	0.125896	0.144012	0.158303	0.13355	0.131233	0.129732	0.137169	0.123893
Water	GBR	0.506913	0.533287	0.500815	0.533693	0.610555	0.633284	0.688372	0.614825	0.607668	0.560075	0.469794	0.461868	0.518619	0.4562	0.472718	0.463122	0.39579	0.394949	0.380176	0.434627	0.379278
Water	USA	0.51467	0.4754	0.528646	0.563768	0.518372	0.535714	0.573448	0.503353	0.520138	0.40903	0.468845	0.475804	0.55417	0.533352	0.508125	0.438306	0.457861	0.466777	0.44571	0.435378	0.436746
Water	JPN	0.340432	0.323955	0.305433	0.294901	0.338665	0.361292	0.396256	0.369794	0.363558	0.306143	0.267619	0.327446	0.3279	0.278951	0.275707	0.21546	0.168261	0.202794	0.182835	0.204326	0.174993
Water	CHN	0.125496	0.118837	0.113274	0.110191	0.111051	0.128213	0.139348	0.140221	0.147024	0.176145	0.190172	0.215292	0.209591	0.21845	0.229854	0.234971	0.215605	0.232583	0.232719	0.258144	0.248251
Water	CAN	0.23748	0.260788	0.258213	0.279514	0.29258	0.32699	0.373364	0.396268	0.348382	0.361154	0.340446	0.374687	0.395651	0.342356	0.313252	0.306808	0.275504	0.305904	0.281222	0.2908	0.305994
Water	KOR	0.266814	0.310494	0.526935	0.324257	0.390873	0.390502	0.452983	0.509811	0.412598	0.310045	0.324195	0.422787	0.449041	0.428354	0.360475	0.31525	0.293396	0.351673	0.346061	0.318284	0.302264
Water	BRA	0.050785	0.0413713	0.0427749	0.0437522	0.0420384	0.04199	0.0462242	0.0509762	0.0587952	0.0547167	0.0575616	0.0694074	0.0691813	0.0673862	0.0633323	0.0549633	0.0524948	0.0559033	0.0524233	0.055778	0.053811
Water	IND	0.387106	0.395285	0.357488	0.373007	0.35837	0.36947	0.394406	0.403423	0.415337	0.401817	0.412096	0.385792	0.411363	0.397546	0.386517	0.407891	0.458777	0.462733	0.471701	0.470621	0.471756
Water	MEX	0.392552	0.412899	0.403392	0.374702	0.355061	0.383687	0.400114	0.370015	0.369723	0.402084	0.367013	0.383823	0.404174	0.361939	0.330153	0.309656	0.294063	0.321764	0.330292	0.323998	0.280584
Water	RUS	0.187674	0.191988	0.131665	0.151221	0.217063	0.189386	0.249285	0.263512	0.293852	0.255801	0.297598	0.307959	0.360732	0.379579	0.32828	0.270439	0.232441	0.239071	0.254741	0.264667	0.222603
Water	AUS	0.873226	1.14654	1.17858	0.969085	0.867532	0.926369	1.21993	0.896652	0.631745	0.700773	0.573605	0.634979	0.68569	0.762786	0.727808	0.725807	0.554601	0.746536	0.584444	0.506084	0.498665
Water	CHE	0.570544	0.53722	0.497312	0.567628	0.544452	0.547519	0.529975	0.520444	0.592071	0.623819	0.450434	0.528211	0.576982	0.530989	0.50644	0.506618	0.420054	0.502813	0.399901	0.482321	0.516547
Water	TUR	0.347291	0.266992	0.261095	0.305156	0.277373	0.334536	0.346583	0.35137	0.37674	0.256523	0.372295	0.270153	0.363739	0.352537	0.450259	0.369438	0.380738	0.405483	0.357138	0.357994	0.528653
Water	TWN	0.204979	0.15821	0.190034	0.166051	0.179577	0.190176	0.195669	0.165961	0.164653	0.153678	0.156294	0.137411	0.12211	0.150288	0.15269	0.134489	0.121827	0.127282	0.122894	0.121335	0.103418
Water	NOR	0.384275	0.502465	0.425644	0.435245	0.485979	0.487431	0.519925	0.539054	0.668504	0.521967	0.503878	0.566587	0.557144	0.531859	0.405919	0.370035	0.37033	0.4153	0.408208	0.450787	0.382106
Water	IDN	0.147165	0.144106	0.153888	0.150882	0.161736	0.163561	0.169513	0.188549	0.189556	0.178369	0.188949	0.202822	0.201645	0.199484	0.206472	0.186484	0.181044	0.188205	0.220955	0.187035	0.178112
Water	ZAF	0.267578	0.23049	0.222684	0.297543	0.306501	0.289816	0.250786	0.298131	0.253698	0.21897	0.199131	0.184541	0.221257	0.190277	0.190405	0.213203	0.193195	0.195908	0.183169	0.203322	0.184229
[truncated: 8 more rows]

## Sheet: Exceedance_UpperBound
indicator	region	2000	2001	2002	2003	2004	2005	2006	2007	2008	2009	2010	2011	2012	2013	2014	2015	2016	2017	2018	2019	2020
[truncated: 364 more rows]

## Sheet: Alloc_LowerBound_Pop
indicator	region	2000	2001	2002	2003	2004	2005	2006	2007	2008	2009	2010	2011	2012	2013	2014	2015	2016	2017	2018	2019	2020	2021	2022	2023	2024	2025	2026	2027	2028	2029	2030	2031	2032	2033	2034	2035	2036	2037	2038	2039	2040	2041	2042	2043	2044	2045	2046	2047
[truncated: 364 more rows]
[truncated: 3 more columns]

[truncated: 19 more sheets: Alloc_LowerBound_PPP, Alloc_UpperBound_Pop, Alloc_UpperBound_PPP, Decoupling_AbsIndex, Decoupling_RelIndex, Decoupling_Yearly, Decoupling_Total, Decoupling_DiffTotal, SDA_3driver, SDA_4driver_MD, SDA_5driver_MDa, Decomp_5drv_2000_2020, Trade_LMDI, Trade_Origin, Trade_DecompInputs, Sens_Allocation, Sens_WaterScarcity, Input_Population, Input_GDP_PPP]
